# Supplementary material for: High-Resolution Mass Spectrometer–Based Ultra-Deep Profile of Milk Whey Proteome in Indian Zebu (Sahiwal) Cattle
Source: Front Nutr. 2020 Sep 11;7:150. doi: 10.3389/fnut.2020.00150 (PMC7533583; doi:10.3389/fnut.2020.00150)
Supplement: Supplementary Table 2 — Final complete table for identifications of total whey proteins in ProteinScape using Mascot search engine through in-gel and in-solution digestion. [file Table_2.XLSX]

## Sheet: Ingel & Insol fractions_ PS
Row	User Flag	OK	Accession	Protein	#Peptides	Modifications	pI	MW [kDa]	#Alt. Proteins	Scores	SC [%]	RMS90 [ppm]	Rank
1		true	tr|B0JYQ0|B0JYQ0_BOVIN	ALB protein OS=Bos taurus GN=ALB PE=2 SV=1	116	Carbamidomethyl, Gln->pyro-Glu, Carbamyl, Carboxymethyl, Oxidation, Phospho, Glu->pyro-Glu	5.9	69.2	1	6113.7 (M:6113.7)	77.9	7642.58	1
2		true	sp|P02769|ALBU_BOVIN	Serum albumin OS=Bos taurus GN=ALB PE=1 SV=4	108	Carbamidomethyl, Gln->pyro-Glu, Carbamyl, Carboxymethyl, Oxidation, Phospho, Glu->pyro-Glu	5.8	69.2	1	5579.1 (M:5579.1)	76.4	8513.27	2
3		true	tr|G3X7A5|G3X7A5_BOVIN	Complement C3 OS=Bos taurus GN=C3 PE=4 SV=1	81	Carbamidomethyl, Gln->pyro-Glu, Carbamyl, Carboxymethyl, Oxidation, Phospho, Glu->pyro-Glu	6.6	187.0	6	4540.2 (M:4540.2)	43.9	12.16	3
4		true	sp|P24627|TRFL_BOVIN	Lactotransferrin OS=Bos taurus GN=LTF PE=1 SV=2	65	Carbamidomethyl, Gln->pyro-Glu, Carbamyl, Carboxymethyl, Oxidation, Phospho, Glu->pyro-Glu	8.7	78.0	16	3888.6 (M:3888.6)	69.5	128.56	4
5		true	sp|P02663|CASA2_BOVIN	Alpha-S2-casein OS=Bos taurus GN=CSN1S2 PE=1 SV=2	62	Carbamidomethyl, Carbamyl, Carboxymethyl, Oxidation, Phospho, Glu->pyro-Glu	8.5	26.0	1	3791.8 (M:3791.8)	73.4	126.96	5
6		true	sp|P02662|CASA1_BOVIN	Alpha-S1-casein OS=Bos taurus GN=CSN1S1 PE=1 SV=2	41	Gln->pyro-Glu, Carbamyl, Oxidation, Phospho, Glu->pyro-Glu	5.0	24.5	2	3580.9 (M:3580.9)	62.6	12.39	6
7		true	tr|B5B3R8|B5B3R8_BOVIN	Alpha S1 casein OS=Bos taurus GN=CSN1S1 PE=2 SV=1	39	Gln->pyro-Glu, Carbamyl, Oxidation, Phospho, Glu->pyro-Glu	5.0	24.4	2	3534.0 (M:3534.0)	82.2	12.27	7
8		true	sp|P80457|XDH_BOVIN	Xanthine dehydrogenase/oxidase OS=Bos taurus GN=XDH PE=1 SV=4	57	Carbamidomethyl, Carbamyl, Carboxymethyl, Oxidation, Phospho	8.0	146.7	3	3438.2 (M:3438.2)	36.1	132.86	8
9		true	tr|F1MR22|F1MR22_BOVIN	Uncharacterized protein OS=Bos taurus GN=PIGR PE=4 SV=1	43	Carbamidomethyl, Carbamyl, Carboxymethyl, Oxidation, Phospho	7.4	82.5	3	3083.7 (M:3083.7)	44.5	9795.88	9
10		true	tr|G3X6N3|G3X6N3_BOVIN	Serotransferrin OS=Bos taurus GN=TF PE=3 SV=1	43	Carbamidomethyl, Carbamyl, Carboxymethyl, Oxidation, Phospho, Glu->pyro-Glu	7.1	77.6	1	2990.7 (M:2990.7)	51.6	156.41	10
11		true	sp|P02754|LACB_BOVIN	Beta-lactoglobulin OS=Bos taurus GN=LGB PE=1 SV=3	50	Carbamidomethyl, Carbamyl, Carboxymethyl, Oxidation, Phospho	4.9	19.9	4	2865.8 (M:2865.8)	95.5	402.53	11
12		true	sp|Q29443|TRFE_BOVIN	Serotransferrin OS=Bos taurus GN=TF PE=2 SV=1	44	Carbamidomethyl, Carbamyl, Carboxymethyl, Oxidation, Phospho, Glu->pyro-Glu	6.8	77.7	1	2865.3 (M:2865.3)	53.3	154.50	12
13		true	tr|B5B0D4|B5B0D4_BOVIN	Major allergen beta-lactoglobulin OS=Bos taurus PE=2 SV=1	49	Carbamidomethyl, Carbamyl, Carboxymethyl, Oxidation, Phospho	4.8	20.0	2	2806.0 (M:2806.0)	95.5	373.02	13
14		true	tr|A6QNW3|A6QNW3_BOVIN	PIGR protein OS=Bos taurus GN=PIGR PE=2 SV=1	37	Carbamidomethyl, Carbamyl, Carboxymethyl, Oxidation, Phospho	7.1	82.5	3	2530.2 (M:2530.2)	43.9	7775.17	14
15		true	sp|P61823|RNAS1_BOVIN	Ribonuclease pancreatic OS=Bos taurus GN=RNASE1 PE=1 SV=1	23	Carbamidomethyl, Gln->pyro-Glu, Carbamyl, Carboxymethyl, Oxidation, Phospho	8.9	16.5	3	2297.4 (M:2297.4)	49.3	10704.47	15
16		true	tr|F1N757|F1N757_BOVIN	Uncharacterized protein OS=Bos taurus GN=TTN PE=4 SV=2	68	Carbamidomethyl, Gln->pyro-Glu, Carbamyl, Carboxymethyl, Oxidation, Phospho, Glu->pyro-Glu	5.9	3811.5	2	2273.3 (M:2273.3)	2.0	573.76	16
17		true	sp|P31096|OSTP_BOVIN	Osteopontin OS=Bos taurus GN=SPP1 PE=1 SV=2	44	Gln->pyro-Glu, Carbamyl, Oxidation, Phospho	4.5	30.9	6	2210.0 (M:2210.0)	46.8	12.23	17
18		true	tr|Q28049|Q28049_BOVIN	Alpha lactalbumin (Fragment) OS=Bos taurus GN=alfaLA PE=3 SV=1	35	Carbamidomethyl, Carbamyl, Carboxymethyl, Oxidation, Phospho, Glu->pyro-Glu	4.8	14.1	2	1909.0 (M:1909.0)	57.7	13263.12	18
19		true	tr|E1BH06|E1BH06_BOVIN	Uncharacterized protein OS=Bos taurus GN=C4A PE=4 SV=2	34	Carbamidomethyl, Gln->pyro-Glu, Carbamyl, Carboxymethyl, Oxidation, Phospho	7.2	192.6	2	1858.7 (M:1858.7)	22.2	10.81	19
20		true	tr|F1N647|F1N647_BOVIN	Fatty acid synthase OS=Bos taurus GN=FASN PE=4 SV=2	36	Carbamidomethyl, Gln->pyro-Glu, Carbamyl, Carboxymethyl, Oxidation, Phospho	6.0	274.1	2	1813.1 (M:1813.1)	18.5	11.39	20
21		true	sp|P80025|PERL_BOVIN	Lactoperoxidase OS=Bos taurus GN=LPO PE=1 SV=1	30	Carbamidomethyl, Gln->pyro-Glu, Carbamyl, Carboxymethyl, Oxidation	8.8	80.6	2	1713.8 (M:1713.8)	37.6	11.35	21
22		true	sp|Q71SP7|FAS_BOVIN	Fatty acid synthase OS=Bos taurus GN=FASN PE=2 SV=1	31	Carbamidomethyl, Gln->pyro-Glu, Carbamyl, Carboxymethyl, Oxidation, Phospho	6.2	274.4	1	1600.8 (M:1600.8)	16.4	11.30	22
23		true	tr|F1MAV0|F1MAV0_BOVIN	Fibrinogen beta chain OS=Bos taurus GN=FGB PE=4 SV=2	25	Carbamidomethyl, Gln->pyro-Glu, Carbamyl, Oxidation, Phospho	8.5	56.4	2	1575.2 (M:1575.2)	43.2	14.36	23
24		true	sp|P02666|CASB_BOVIN	Beta-casein OS=Bos taurus GN=CSN2 PE=1 SV=2	22	Carbamyl, Oxidation, Phospho	5.3	25.1	3	1547.6 (M:1547.6)	83.9	14.18	24
25		true	sp|P02676|FIBB_BOVIN	Fibrinogen beta chain OS=Bos taurus GN=FGB PE=1 SV=2	25	Carbamidomethyl, Gln->pyro-Glu, Carbamyl, Carboxymethyl, Oxidation, Phospho	8.5	53.3	1	1525.6 (M:1525.6)	44.4	14.32	25
26		true	sp|Q7SIH1|A2MG_BOVIN	Alpha-2-macroglobulin OS=Bos taurus GN=A2M PE=1 SV=2	31	Carbamidomethyl, Carbamyl, Carboxymethyl, Oxidation, Phospho	5.7	167.5	15	1516.3 (M:1516.3)	24.4	13.55	26
27		true	tr|F1MXX6|F1MXX6_BOVIN	Lactadherin OS=Bos taurus GN=MFGE8 PE=4 SV=1	25	Carbamidomethyl, Gln->pyro-Glu, Carbamyl, Carboxymethyl, Oxidation	6.8	47.8	5	1501.0 (M:1501.0)	51.5	24.41	27
28		true	sp|P18892|BT1A1_BOVIN	Butyrophilin subfamily 1 member A1 OS=Bos taurus GN=BTN1A1 PE=1 SV=2	24	Carbamidomethyl, Gln->pyro-Glu, Carbamyl, Oxidation, Phospho, Glu->pyro-Glu	5.1	59.2	7	1485.8 (M:1485.8)	31.4	11.79	28
29		true	sp|P80195|GLCM1_BOVIN	Glycosylation-dependent cell adhesion molecule 1 OS=Bos taurus GN=GLYCAM1 PE=1 SV=2	27	Carbamyl, Phospho, Glu->pyro-Glu	6.2	17.1	1	1476.7 (M:1476.7)	60.8	182.29	29
30		true	sp|Q0P569|NUCB1_BOVIN	Nucleobindin-1 OS=Bos taurus GN=NUCB1 PE=2 SV=1	26	Gln->pyro-Glu, Carbamyl, Oxidation, Phospho, Glu->pyro-Glu	5.1	54.9	1	1321.6 (M:1321.6)	48.1	11.89	30
31		true	tr|B8Y9S9|B8Y9S9_BOVIN	Embryo-specific fibronectin 1 transcript variant OS=Bos taurus GN=FN1 PE=2 SV=1	26	Carbamidomethyl, Gln->pyro-Glu, Carbamyl, Phospho	5.5	262.3	8	1312.3 (M:1312.3)	15.4	10.94	31
32		true	tr|F1MVK1|F1MVK1_BOVIN	Uncharacterized protein (Fragment) OS=Bos taurus PE=4 SV=2	23	Carbamidomethyl, Gln->pyro-Glu, Carbamyl, Carboxymethyl, Oxidation, Phospho	6.5	173.9	1	1261.0 (M:1261.0)	15.3	10.79	32
33		true	tr|Q0IIH5|Q0IIH5_BOVIN	Nucleobindin 2 OS=Bos taurus GN=NUCB2 PE=2 SV=1	21	Gln->pyro-Glu, Carbamyl, Oxidation	5.1	49.2	1	1213.3 (M:1213.3)	46.5	11.69	33
34		true	tr|G9G9X6|G9G9X6_BOVIN	Alpha-lactalbumin protein variant D OS=Bos taurus GN=LALBA PE=3 SV=1	24	Carbamidomethyl, Carbamyl, Carboxymethyl, Oxidation, Phospho	5.1	16.2	1	1191.7 (M:1191.7)	43.0	13289.79	34
35		true	sp|P15497|APOA1_BOVIN	Apolipoprotein A-I OS=Bos taurus GN=APOA1 PE=1 SV=3	17	Gln->pyro-Glu, Carbamyl, Phospho, Glu->pyro-Glu	5.7	30.3	2	1155.2 (M:1155.2)	57.7	11.40	35
36		true	tr|A5PJE3|A5PJE3_BOVIN	Fibrinogen alpha chain OS=Bos taurus GN=FGA PE=2 SV=1	19	Carbamidomethyl, Carbamyl, Phospho	6.6	67.0	2	1111.6 (M:1111.6)	33.5	11.76	36
37		true	sp|Q9XSG3|IDHC_BOVIN	Isocitrate dehydrogenase [NADP] cytoplasmic OS=Bos taurus GN=IDH1 PE=2 SV=1	20	Carbamidomethyl, Carbamyl, Oxidation	6.1	46.8	1	1041.1 (M:1041.1)	44.9	11.20	37
38		true	tr|K4JF16|K4JF16_BOVIN	Alpha-2-macroglobulin variant 23 OS=Bos taurus GN=A2M PE=2 SV=1	16	Carbamidomethyl, Carbamyl, Oxidation	5.7	101.3	4	1021.3 (M:1021.3)	22.0	10.81	38
39		true	sp|Q0VCX2|GRP78_BOVIN	78 kDa glucose-regulated protein OS=Bos taurus GN=HSPA5 PE=2 SV=1	18	Carbamyl, Phospho	5.1	72.4	2	966.9 (M:966.9)	26.9	10.66	39
40		true	sp|Q3ZCH5|ZA2G_BOVIN	Zinc-alpha-2-glycoprotein OS=Bos taurus GN=AZGP1 PE=2 SV=1	17	Carbamidomethyl, Gln->pyro-Glu, Carbamyl, Oxidation	5.1	33.8	4	950.1 (M:950.1)	44.5	11.52	40
41		true	sp|P17697|CLUS_BOVIN	Clusterin OS=Bos taurus GN=CLU PE=1 SV=1	16	Carbamidomethyl, Carbamyl, Carboxymethyl, Oxidation, Phospho, Glu->pyro-Glu	5.7	51.1	2	942.5 (M:942.5)	29.6	12.30	41
42		true	sp|P00735|THRB_BOVIN	Prothrombin OS=Bos taurus GN=F2 PE=1 SV=2	14	Carbamidomethyl	6.0	70.5	1	933.7 (M:933.7)	30.2	11.07	42
43		true	tr|Q3SZZ9|Q3SZZ9_BOVIN	FGG protein OS=Bos taurus GN=FGG PE=2 SV=1	17	Carbamidomethyl, Carboxymethyl	5.6	49.1	3	932.9 (M:932.9)	49.7	135.02	43
44		true	sp|P19120|HSP7C_BOVIN	Heat shock cognate 71 kDa protein OS=Bos taurus GN=HSPA8 PE=1 SV=2	19	Carbamyl, Phospho	5.4	71.2	5	930.8 (M:930.8)	32.5	11.42	44
45		true	tr|F1N3Q7|F1N3Q7_BOVIN	Apolipoprotein A-IV OS=Bos taurus GN=APOA4 PE=4 SV=1	21	Gln->pyro-Glu, Carbamyl, Oxidation	5.3	43.0	2	914.0 (M:914.0)	52.1	21.72	45
46		true	tr|Q0QEQ4|Q0QEQ4_BOVIN	Isocitrate dehydrogenase 1 (Fragment) OS=Bos taurus GN=IDH1 PE=2 SV=1	17	Carbamidomethyl, Carbamyl, Oxidation	6.1	41.3	1	904.7 (M:904.7)	46.9	10.99	46
47		true	sp|Q3SX14|GELS_BOVIN	Gelsolin OS=Bos taurus GN=GSN PE=2 SV=1	16	Gln->pyro-Glu, Carbamyl, Oxidation, Phospho	5.5	80.7	3	904.6 (M:904.6)	25.0	13.53	47
48		true	sp|Q4GZT4|ABCG2_BOVIN	ATP-binding cassette sub-family G member 2 OS=Bos taurus GN=ABCG2 PE=3 SV=2	15	Carbamidomethyl	8.9	72.7	5	897.7 (M:897.7)	22.4	10.88	48
49		true	sp|Q29RQ1|CO7_BOVIN	Complement component C7 OS=Bos taurus GN=C7 PE=2 SV=1	18	Carbamidomethyl, Gln->pyro-Glu, Carbamyl, Carboxymethyl, Oxidation, Phospho, Glu->pyro-Glu	6.9	93.0	2	879.9 (M:879.9)	24.6	109.88	49
50		true	tr|I7CT57|I7CT57_BOVIN	Vitamin D binding protein OS=Bos taurus PE=2 SV=1	16	Carbamidomethyl, Carbamyl, Carboxymethyl	5.4	53.3	3	878.2 (M:878.2)	36.9	11.87	50
51		true	tr|G5E513|G5E513_BOVIN	Uncharacterized protein (Fragment) OS=Bos taurus PE=4 SV=1	14	Carbamidomethyl, Gln->pyro-Glu, Carbamyl, Oxidation	5.3	49.9	1	854.1 (M:854.1)	37.0	11.19	51
52		true	tr|F1N726|F1N726_BOVIN	Uncharacterized protein OS=Bos taurus GN=GP2 PE=4 SV=1	17	Carbamidomethyl, Carbamyl, Oxidation, Phospho	4.7	59.2	2	839.6 (M:839.6)	27.3	12.23	52
53		true	tr|G3X6K8|G3X6K8_BOVIN	Haptoglobin OS=Bos taurus GN=HP PE=3 SV=1	19	Carbamidomethyl, Gln->pyro-Glu, Oxidation	7.8	44.8	3	831.4 (M:831.4)	54.1	11.25	53
54		true	tr|G5E5T5|G5E5T5_BOVIN	Uncharacterized protein (Fragment) OS=Bos taurus GN=IGHM PE=4 SV=1	12	Carbamidomethyl, Gln->pyro-Glu, Carbamyl, Oxidation	4.9	42.4	1	823.6 (M:823.6)	32.6	11.34	54
55		true	tr|Q1RMN8|Q1RMN8_BOVIN	Immunoglobulin light chain, lambda gene cluster OS=Bos taurus GN=IGL@ PE=2 SV=1	15	Carbamidomethyl, Carbamyl, Carboxymethyl, Phospho	7.5	24.5	4	823.1 (M:823.1)	36.8	13819.21	55
56		true	sp|P81187|CFAB_BOVIN	Complement factor B OS=Bos taurus GN=CFB PE=1 SV=2	14	Carbamidomethyl	7.9	85.3	2	815.2 (M:815.2)	24.0	10.76	56
57		true	tr|F1MSZ6|F1MSZ6_BOVIN	Antithrombin-III OS=Bos taurus GN=SERPINC1 PE=3 SV=1	15	Carbamidomethyl, Carbamyl, Phospho	6.4	52.4	2	813.3 (M:813.3)	32.3	22.50	57
58		true	sp|P10790|FABPH_BOVIN	Fatty acid-binding protein, heart OS=Bos taurus GN=FABP3 PE=1 SV=2	15	Carbamidomethyl, Gln->pyro-Glu, Carbamyl, Oxidation	6.7	14.8	4	808.2 (M:808.2)	72.9	347.09	58
59		true	sp|P01044|KNG1_BOVIN	Kininogen-1 OS=Bos taurus GN=KNG1 PE=1 SV=1	13	Carbamidomethyl, Carbamyl, Carboxymethyl, Oxidation	6.1	68.8	3	806.3 (M:806.3)	19.6	12.42	59
60		true	tr|F1N4M7|F1N4M7_BOVIN	Uncharacterized protein OS=Bos taurus GN=CFI PE=3 SV=2	16	Carbamidomethyl, Carbamyl, Carboxymethyl, Oxidation, Phospho, Glu->pyro-Glu	8.1	68.9	2	791.1 (M:791.1)	29.9	158.30	60
61		true	tr|F1N6H4|F1N6H4_BOVIN	Uncharacterized protein (Fragment) OS=Bos taurus GN=MACF1 PE=4 SV=2	27	Carbamidomethyl, Gln->pyro-Glu, Carbamyl, Carboxymethyl, Oxidation, Phospho, Glu->pyro-Glu	5.2	824.2	1	783.7 (M:783.7)	3.0	558.11	61
62		true	sp|P12763|FETUA_BOVIN	Alpha-2-HS-glycoprotein OS=Bos taurus GN=AHSG PE=1 SV=2	11	Carbamidomethyl, Gln->pyro-Glu, Phospho	5.3	38.4	1	773.0 (M:773.0)	25.3	10.57	62
63		true	sp|P01045|KNG2_BOVIN	Kininogen-2 OS=Bos taurus GN=KNG2 PE=1 SV=1	11	Carbamidomethyl, Carbamyl, Carboxymethyl, Oxidation	6.1	68.7	2	770.8 (M:770.8)	17.4	11.97	63
64		true	sp|Q03247|APOE_BOVIN	Apolipoprotein E OS=Bos taurus GN=APOE PE=2 SV=1	15	Gln->pyro-Glu, Oxidation, Phospho	5.5	36.0	3	760.6 (M:760.6)	44.3	11.23	64
65		true	tr|F1N3A1|F1N3A1_BOVIN	Thrombospondin-1 OS=Bos taurus GN=THBS1 PE=4 SV=1	17	Carbamidomethyl, Carbamyl, Carboxymethyl, Phospho	4.7	129.3	2	745.0 (M:745.0)	16.3	21.78	65
66		true	sp|Q28178|TSP1_BOVIN	Thrombospondin-1 OS=Bos taurus GN=THBS1 PE=2 SV=2	17	Carbamidomethyl, Carbamyl, Carboxymethyl, Phospho	4.7	129.5	1	736.2 (M:736.2)	16.3	21.82	66
67		true	sp|P63258|ACTG_BOVIN	Actin, cytoplasmic 2 OS=Bos taurus GN=ACTG1 PE=1 SV=1	13	Carbamidomethyl, Gln->pyro-Glu, Carbamyl, Carboxymethyl, Oxidation, Phospho, Glu->pyro-Glu	5.3	41.8	8	714.1 (M:714.1)	36.8	202.56	67
68		true	tr|A6QM09|A6QM09_BOVIN	Putative uncharacterized protein OS=Bos taurus PE=2 SV=1	14	Carbamidomethyl, Carbamyl, Phospho	7.5	24.7	1	708.9 (M:708.9)	47.8	149.62	68
69		true	tr|G3N0V0|G3N0V0_BOVIN	Uncharacterized protein (Fragment) OS=Bos taurus PE=4 SV=1	18	Carbamidomethyl, Gln->pyro-Glu, Carbamyl, Carboxymethyl, Oxidation, Phospho, Glu->pyro-Glu	8.0	35.9	1	705.9 (M:705.9)	36.5	6227.17	69
70		true	tr|F1N076|F1N076_BOVIN	Uncharacterized protein OS=Bos taurus GN=CP PE=4 SV=2	15	Carbamidomethyl, Carbamyl, Phospho	5.8	123.7	2	687.4 (M:687.4)	18.3	12.91	70
71		true	tr|Q8HZM7|Q8HZM7_BOVIN	Perilipin OS=Bos taurus GN=ADRP PE=2 SV=1	14	Carbamidomethyl, Carbamyl, Phospho	8.6	45.3	10	676.8 (M:676.8)	43.2	10.87	71
72		true	sp|P01030|CO4_BOVIN	Complement C4 (Fragments) OS=Bos taurus GN=C4 PE=1 SV=2	13	Carbamidomethyl, Carbamyl, Carboxymethyl, Phospho	6.2	101.8	1	674.6 (M:674.6)	16.8	10.29	72
73		true	tr|A1L5C2|A1L5C2_BOVIN	Perilipin OS=Bos taurus GN=ADFP PE=2 SV=1	14	Carbamidomethyl, Carbamyl, Phospho	8.7	49.3	1	670.1 (M:670.1)	39.6	10.44	73
74		true	tr|F1MZ96|F1MZ96_BOVIN	Uncharacterized protein OS=Bos taurus PE=4 SV=2	9	Carbamidomethyl, Carbamyl, Carboxymethyl	6.4	26.5	3	659.6 (M:659.6)	30.4	149.12	74
75		true	tr|G5E5D5|G5E5D5_BOVIN	Uncharacterized protein OS=Bos taurus GN=LOC787476 PE=4 SV=1	21	Carbamidomethyl, Gln->pyro-Glu, Carbamyl, Carboxymethyl, Oxidation, Phospho, Glu->pyro-Glu	6.2	770.6	1	657.4 (M:657.4)	3.0	6423.58	75
76		true	tr|Q05B55|Q05B55_BOVIN	IGK protein OS=Bos taurus GN=IGK PE=2 SV=1	9	Carbamidomethyl, Carbamyl, Carboxymethyl, Phospho	6.1	26.6	1	652.6 (M:652.6)	30.4	459.57	76
77		true	sp|Q95121|PEDF_BOVIN	Pigment epithelium-derived factor OS=Bos taurus GN=SERPINF1 PE=1 SV=1	13	Carbamidomethyl, Oxidation	6.6	46.2	1	649.6 (M:649.6)	36.3	10.88	77
78		true	tr|A3FJ56|A3FJ56_BOVIN	Kappa casein (Fragment) OS=Bos taurus PE=4 SV=1	10	Carbamidomethyl, Carbamyl, Carboxymethyl, Oxidation, Phospho	7.9	17.8	9	648.6 (M:648.6)	24.4	14048.47	78
79		true	sp|P06394|K1C10_BOVIN	Keratin, type I cytoskeletal 10 OS=Bos taurus GN=KRT10 PE=3 SV=1	14	Carbamidomethyl, Gln->pyro-Glu, Carbamyl, Phospho	5.0	54.8	4	638.8 (M:638.8)	21.5	13.76	79
80		true	tr|Q3T101|Q3T101_BOVIN	IGL@ protein OS=Bos taurus GN=IGL@ PE=1 SV=1	12	Carbamidomethyl, Carbamyl, Carboxymethyl, Phospho	5.8	24.6	2	627.9 (M:627.9)	40.4	370.50	80
81		true	tr|E1B6Z6|E1B6Z6_BOVIN	Uncharacterized protein (Fragment) OS=Bos taurus GN=LCN2 PE=3 SV=2	9	Carbamidomethyl, Carbamyl, Oxidation, Phospho	9.4	23.0	1	622.2 (M:622.2)	43.0	11.69	81
82		true	sp|P22226|CTHL1_BOVIN	Cathelicidin-1 OS=Bos taurus GN=CATHL1 PE=1 SV=2	10	Carbamidomethyl, Carboxymethyl	7.6	17.6	1	621.5 (M:621.5)	57.4	8662.76	82
83		true	tr|G8JKZ1|G8JKZ1_BOVIN	Ectonucleotide pyrophosphatase/phosphodiesterase family member 3 OS=Bos taurus GN=ENPP3 PE=4 SV=1	15	Carbamidomethyl, Carbamyl, Oxidation, Phospho	5.6	99.4	2	621.4 (M:621.4)	22.5	12.69	83
84		true	sp|P06868|PLMN_BOVIN	Plasminogen OS=Bos taurus GN=PLG PE=1 SV=2	15	Carbamidomethyl, Carbamyl, Carboxymethyl, Oxidation	7.7	91.2	3	621.1 (M:621.1)	22.2	10.42	84
85		true	sp|P48616|VIME_BOVIN	Vimentin OS=Bos taurus GN=VIM PE=1 SV=3	11	Carbamyl, Oxidation, Phospho	5.0	53.7	1	612.1 (M:612.1)	26.4	178.61	85
86		true	sp|P05307|PDIA1_BOVIN	Protein disulfide-isomerase OS=Bos taurus GN=P4HB PE=1 SV=1	11	Carbamyl, Oxidation	4.8	57.2	2	595.3 (M:595.3)	19.6	11.57	86
87		true	tr|F1N6D4|F1N6D4_BOVIN	Sodium-dependent phosphate transport protein 2B OS=Bos taurus GN=SLC34A2 PE=4 SV=1	12	Carbamidomethyl, Carbamyl, Oxidation, Phospho	7.6	75.8	3	585.8 (M:585.8)	19.2	273.88	87
88		true	tr|Q58DW1|Q58DW1_BOVIN	Fatty acid binding protein 3 OS=Bos taurus GN=FABP3 PE=2 SV=1	9	Carbamidomethyl, Carbamyl	6.7	10.9	1	573.3 (M:573.3)	73.5	229.33	88
89		true	tr|F1MNT4|F1MNT4_BOVIN	Uncharacterized protein (Fragment) OS=Bos taurus GN=LAMB1 PE=4 SV=2	15	Carbamidomethyl, Carbamyl, Phospho	5.0	198.6	1	569.6 (M:569.6)	9.0	19.06	89
90		true	tr|Q3SYR8|Q3SYR8_BOVIN	Immunoglobulin J chain OS=Bos taurus GN=IGJ PE=2 SV=1	7	Carbamidomethyl, Oxidation	5.1	17.8	1	569.1 (M:569.1)	51.6	11.55	90
91		true	tr|E7E1P7|E7E1P7_BOVIN	Kappa casein (Fragment) OS=Bos taurus GN=CSN3 PE=4 SV=1	10	Carbamidomethyl, Carbamyl, Carboxymethyl, Oxidation, Phospho	6.3	15.7	1	568.4 (M:568.4)	60.6	14046.50	91
92		true	tr|A6H7J7|A6H7J7_BOVIN	Putative uncharacterized protein OS=Bos taurus PE=2 SV=1	11	Carbamidomethyl, Carbamyl, Phospho	6.6	24.5	1	565.2 (M:565.2)	33.6	171.43	92
93		true	tr|E1BA17|E1BA17_BOVIN	Uncharacterized protein OS=Bos taurus GN=COL14A1 PE=4 SV=2	17	Carbamyl, Phospho	5.1	193.7	1	564.2 (M:564.2)	9.2	10.52	93
94		true	sp|Q3MHX6|OS9_BOVIN	Protein OS-9 OS=Bos taurus GN=OS9 PE=2 SV=1	11	Carbamidomethyl	4.8	75.7	3	563.4 (M:563.4)	23.1	11.84	94
95		true	tr|F1MCF8|F1MCF8_BOVIN	Uncharacterized protein OS=Bos taurus GN=IGLL1 PE=4 SV=2	11	Carbamidomethyl, Carbamyl, Phospho	7.5	24.5	1	559.0 (M:559.0)	31.2	170.46	95
96		true	tr|F2FB38|F2FB38_BOVIN	Mucin-16 OS=Bos taurus GN=MUC16 PE=4 SV=1	12	Carbamidomethyl, Carbamyl, Oxidation, Phospho	5.3	531.6	2	556.8 (M:556.8)	2.7	34.39	96
97		true	tr|G5E604|G5E604_BOVIN	Uncharacterized protein (Fragment) OS=Bos taurus PE=4 SV=1	8	Carbamidomethyl, Gln->pyro-Glu, Carbamyl, Carboxymethyl	8.0	11.1	2	553.9 (M:553.9)	52.3	484.59	97
98		true	tr|K4JDR8|K4JDR8_BOVIN	Alpha-2-macroglobulin variant 5 OS=Bos taurus GN=A2M PE=2 SV=1	11	Carbamidomethyl, Carbamyl, Phospho	7.1	45.0	2	551.4 (M:551.4)	32.8	20.79	98
99		true	tr|A5D7Q2|A5D7Q2_BOVIN	Putative uncharacterized protein OS=Bos taurus PE=2 SV=1	8	Carbamidomethyl, Gln->pyro-Glu, Carbamyl, Carboxymethyl, Oxidation	6.2	51.6	2	551.0 (M:551.0)	13.6	11.32	99
100		true	tr|E7E1P8|E7E1P8_BOVIN	Kappa casein (Fragment) OS=Bos taurus GN=CSN3 PE=4 SV=1	9	Carbamidomethyl, Carbamyl, Carboxymethyl, Oxidation, Phospho	6.3	15.5	1	547.3 (M:547.3)	58.2	14898.43	100
101		true	tr|A5PK49|A5PK49_BOVIN	IGL@ protein OS=Bos taurus GN=IGL@ PE=2 SV=1	10	Carbamidomethyl, Carbamyl, Phospho	7.5	24.6	1	545.3 (M:545.3)	27.8	179.64	101
102		true	tr|Q5J801|Q5J801_BOVIN	Endopin 2B OS=Bos taurus PE=2 SV=1	12	Carbamyl, Phospho	5.8	47.0	6	544.9 (M:544.9)	28.5	212.43	102
103		true	tr|A6QQA8|A6QQA8_BOVIN	Sulfhydryl oxidase OS=Bos taurus GN=QSOX1 PE=2 SV=1	11	Carbamidomethyl, Phospho, Glu->pyro-Glu	9.3	62.9	2	537.6 (M:537.6)	21.9	10.30	103
104		true	sp|P50397|GDIB_BOVIN	Rab GDP dissociation inhibitor beta OS=Bos taurus GN=GDI2 PE=2 SV=3	13	Carbamidomethyl	5.9	50.5	1	534.1 (M:534.1)	38.2	11.15	104
105		true	tr|F1MQA8|F1MQA8_BOVIN	Uncharacterized protein OS=Bos taurus GN=EHBP1 PE=4 SV=2	16	Carbamyl, Oxidation, Phospho, Glu->pyro-Glu	5.3	139.8	1	527.4 (M:527.4)	2.8	382.48	105
106		true	tr|A6QPP2|A6QPP2_BOVIN	SERPIND1 protein OS=Bos taurus GN=SERPIND1 PE=2 SV=1	11	Carbamidomethyl	6.4	55.2	1	525.1 (M:525.1)	29.8	11.68	106
107		true	sp|P50448|F12AI_BOVIN	Factor XIIa inhibitor OS=Bos taurus PE=1 SV=1	12	Carbamyl, Phospho	6.2	51.7	2	523.0 (M:523.0)	21.6	90.56	107
108		true	tr|Q3ZC00|Q3ZC00_BOVIN	Lymphocyte cytosolic protein 1 (L-plastin) OS=Bos taurus GN=LCP1 PE=2 SV=1	11	Carbamidomethyl, Carbamyl	5.2	70.0	2	521.3 (M:521.3)	23.4	10.54	108
109		true	tr|G3N0V2|G3N0V2_BOVIN	Uncharacterized protein OS=Bos taurus GN=KRT1 PE=3 SV=1	10	Carbamyl, Oxidation, Phospho	8.4	63.1	1	521.1 (M:521.1)	16.7	12.39	109
110		true	sp|A6QR11|NELL2_BOVIN	Protein kinase C-binding protein NELL2 OS=Bos taurus GN=NELL2 PE=2 SV=1	13	Carbamidomethyl, Carbamyl, Oxidation	5.5	91.2	1	512.3 (M:512.3)	19.6	10.08	110
111		true	tr|G3N2D8|G3N2D8_BOVIN	Uncharacterized protein OS=Bos taurus GN=GGT1 PE=4 SV=1	11	Carbamidomethyl, Carbamyl, Phospho	5.9	60.9	1	510.7 (M:510.7)	16.0	34.21	111
112		true	tr|F1MPE1|F1MPE1_BOVIN	Uncharacterized protein OS=Bos taurus GN=CD109 PE=4 SV=2	9	Carbamyl, Phospho	5.4	161.6	1	500.4 (M:500.4)	8.2	10.23	112
113		true	tr|F1MLW8|F1MLW8_BOVIN	Uncharacterized protein OS=Bos taurus PE=4 SV=2	6	Carbamidomethyl, Carbamyl	5.6	24.6	1	498.4 (M:498.4)	25.8	12.41	113
114		true	tr|F1MFI4|F1MFI4_BOVIN	Uncharacterized protein (Fragment) OS=Bos taurus GN=CRTAC1 PE=4 SV=2	10	Carbamidomethyl, Gln->pyro-Glu, Carbamyl	5.1	69.9	1	498.3 (M:498.3)	16.7	11.31	114
115		true	tr|G5E507|G5E507_BOVIN	Heat shock protein HSP 90-beta OS=Bos taurus GN=HSP90AB1 PE=3 SV=1	9	Carbamyl, Phospho	4.9	82.8	7	492.3 (M:492.3)	18.1	9.03	115
116		true	sp|Q2KJF1|A1BG_BOVIN	Alpha-1B-glycoprotein OS=Bos taurus GN=A1BG PE=1 SV=1	8	Carbamidomethyl	5.3	53.5	1	491.9 (M:491.9)	22.1	11.27	116
117		true	tr|A6QNW7|A6QNW7_BOVIN	CD5L protein OS=Bos taurus GN=CD5L PE=2 SV=1	9	Carbamidomethyl, Carboxymethyl	5.2	50.2	2	489.7 (M:489.7)	24.6	285.21	117
118		true	tr|F1MSI2|F1MSI2_BOVIN	Uncharacterized protein (Fragment) OS=Bos taurus GN=AGRN PE=4 SV=1	9	Carbamidomethyl, Carbamyl, Phospho	5.8	215.1	1	486.7 (M:486.7)	6.3	10.33	118
119		true	tr|Q58DT9|Q58DT9_BOVIN	Alpha 2 actin OS=Bos taurus GN=ACTA2 PE=2 SV=1	9	Carbamidomethyl, Carbamyl, Oxidation, Phospho, Glu->pyro-Glu	5.8	45.2	10	484.6 (M:484.6)	18.2	11.90	119
120		true	tr|F1MC45|F1MC45_BOVIN	Complement factor H (Fragment) OS=Bos taurus GN=CFH PE=4 SV=2	11	Carbamidomethyl, Carbamyl, Carboxymethyl	6.0	96.5	2	479.8 (M:479.8)	20.6	271.96	120
121		true	sp|P02702|FOLR1_BOVIN	Folate receptor alpha OS=Bos taurus GN=FOLR1 PE=1 SV=3	8	Carbamidomethyl, Oxidation	8.1	27.9	2	476.8 (M:476.8)	34.4	11.76	121
122		true	tr|G3MZ71|G3MZ71_BOVIN	Uncharacterized protein OS=Bos taurus GN=KRT2 PE=3 SV=1	9	Carbamidomethyl, Carbamyl, Oxidation, Phospho	8.9	64.3	4	471.4 (M:471.4)	13.9	11.79	122
123		true	tr|E1BH49|E1BH49_BOVIN	Uncharacterized protein OS=Bos taurus GN=FSIP2 PE=4 SV=2	15	Carbamidomethyl, Carbamyl, Carboxymethyl, Oxidation, Phospho	6.1	770.8	2	470.5 (M:470.5)	2.1	651.51	123
124		true	tr|F1MPT5|F1MPT5_BOVIN	Uncharacterized protein (Fragment) OS=Bos taurus GN=DST PE=4 SV=2	13	Carbamidomethyl, Gln->pyro-Glu, Carbamyl, Oxidation, Phospho, Glu->pyro-Glu	5.1	843.7	1	470.3 (M:470.3)	1.4	232.12	124
125		true	sp|P68250-2|1433B_BOVIN	Isoform Short of 14-3-3 protein beta/alpha OS=Bos taurus GN=YWHAB	8	Oxidation	4.8	27.8	2	469.8 (M:469.8)	37.3	10.64	125
126		true	tr|E1BDY3|E1BDY3_BOVIN	Uncharacterized protein OS=Bos taurus GN=GLG1 PE=4 SV=2	12	Carbamidomethyl, Gln->pyro-Glu, Carbamyl, Carboxymethyl, Oxidation, Phospho	6.5	134.5	2	468.9 (M:468.9)	10.7	8522.19	126
127		true	tr|F1MVS9|F1MVS9_BOVIN	Uncharacterized protein OS=Bos taurus GN=MASP1 PE=3 SV=1	8	Carbamidomethyl	5.0	81.2	3	466.4 (M:466.4)	13.9	11.11	127
128		true	tr|F6R3I5|F6R3I5_BOVIN	Uncharacterized protein OS=Bos taurus GN=CRISP3 PE=4 SV=1	7	Carbamidomethyl, Carboxymethyl	8.3	27.1	2	463.2 (M:463.2)	36.8	361.35	128
129		true	tr|Q9TRB9|Q9TRB9_BOVIN	Enterotoxin-binding glycoprotein PP20K (Fragment) OS=Bos taurus PE=1 SV=1	10	Carbamyl, Oxidation, Phospho	8.5	2.3	1	457.4 (M:457.4)	100.0	27.52	129
130		true	sp|Q28085|CFAH_BOVIN	Complement factor H OS=Bos taurus GN=CFH PE=1 SV=3	13	Carbamidomethyl, Carbamyl, Carboxymethyl	6.4	140.3	1	453.6 (M:453.6)	17.0	248.30	130
131		true	sp|Q2TBX4|HSP13_BOVIN	Heat shock 70 kDa protein 13 OS=Bos taurus GN=HSPA13 PE=2 SV=1	10	Gln->pyro-Glu	5.2	51.9	1	450.3 (M:450.3)	21.2	16.47	131
132		true	tr|A1L5B6|A1L5B6_BOVIN	Annexin OS=Bos taurus GN=ANXA5 PE=2 SV=1	9	Carbamyl, Phospho	4.9	36.1	4	446.7 (M:446.7)	30.8	10.91	132
133		true	tr|F1N3U7|F1N3U7_BOVIN	Uncharacterized protein (Fragment) OS=Bos taurus GN=BPTF PE=4 SV=1	12	Carbamidomethyl, Carbamyl, Oxidation, Phospho	6.6	316.6	1	444.5 (M:444.5)	4.2	614.57	133
134		true	sp|Q2HJ49|MOES_BOVIN	Moesin OS=Bos taurus GN=MSN PE=2 SV=3	11	Gln->pyro-Glu, Carbamyl, Oxidation, Phospho, Glu->pyro-Glu	5.9	67.9	1	439.0 (M:439.0)	17.9	209.39	134
135		true	tr|F1MQI3|F1MQI3_BOVIN	Uncharacterized protein OS=Bos taurus GN=NEB PE=4 SV=2	16	Carbamidomethyl, Gln->pyro-Glu, Carbamyl, Carboxymethyl, Oxidation, Phospho, Glu->pyro-Glu	9.2	801.4	3	437.7 (M:437.7)	2.2	487.79	135
136		true	tr|F1MF78|F1MF78_BOVIN	Uncharacterized protein (Fragment) OS=Bos taurus GN=SYNE2 PE=4 SV=2	12	Carbamidomethyl, Gln->pyro-Glu, Carbamyl, Oxidation, Phospho, Glu->pyro-Glu	5.2	788.8	5	437.2 (M:437.2)	2.0	367.21	136
137		true	sp|Q5XQN5|K2C5_BOVIN	Keratin, type II cytoskeletal 5 OS=Bos taurus GN=KRT5 PE=1 SV=1	7	Carbamidomethyl, Carbamyl, Phospho, Glu->pyro-Glu	7.6	62.9	4	434.1 (M:434.1)	11.0	308.84	137
138		true	tr|F1MN78|F1MN78_BOVIN	Serpin B4 OS=Bos taurus PE=2 SV=1	10	Carbamidomethyl, Carbamyl, Oxidation, Phospho	6.2	44.4	4	432.5 (M:432.5)	27.4	11.64	138
139		true	sp|Q3SZV7|HEMO_BOVIN	Hemopexin OS=Bos taurus GN=HPX PE=2 SV=1	11	Carbamidomethyl, Carbamyl, Oxidation, Phospho	7.9	52.2	1	432.4 (M:432.4)	23.7	16.24	139
140		true	tr|E1BL04|E1BL04_BOVIN	Uncharacterized protein OS=Bos taurus GN=XIRP2 PE=4 SV=2	10	Carbamidomethyl, Gln->pyro-Glu, Carbamyl, Carboxymethyl, Oxidation, Phospho, Glu->pyro-Glu	5.9	428.5	2	428.2 (M:428.2)	2.5	661.13	140
141		true	tr|F1MDH3|F1MDH3_BOVIN	Uncharacterized protein (Fragment) OS=Bos taurus GN=TLN1 PE=4 SV=2	9	Carbamidomethyl, Carbamyl, Oxidation, Phospho, Glu->pyro-Glu	5.8	270.6	2	426.6 (M:426.6)	4.1	324.07	141
142		true	sp|Q1JPB0|ILEU_BOVIN	Leukocyte elastase inhibitor OS=Bos taurus GN=SERPINB1 PE=2 SV=2	8	Carbamyl, Phospho	5.7	42.2	2	423.7 (M:423.7)	20.7	16.48	142
143		true	sp|Q76LV2|HS90A_BOVIN	Heat shock protein HSP 90-alpha OS=Bos taurus GN=HSP90AA1 PE=1 SV=3	8		4.9	84.7	4	423.6 (M:423.6)	14.6	9.82	143
144		true	tr|Q5EA67|Q5EA67_BOVIN	Inter-alpha (Globulin) inhibitor H4 (Plasma Kallikrein-sensitive glycoprotein) OS=Bos taurus GN=ITIH4 PE=2 SV=1	10	Carbamyl, Phospho	6.3	101.4	3	420.8 (M:420.8)	11.6	11.27	144
145		true	tr|X5F5B4|X5F5B4_BOVIN	Serpin B4-like protein OS=Bos taurus PE=2 SV=1	10	Carbamyl, Oxidation, Phospho	6.2	38.6	1	419.1 (M:419.1)	31.6	11.34	145
146		true	tr|Q58DP6|Q58DP6_BOVIN	Ribonuclease 4 OS=Bos taurus GN=RNASE4 PE=2 SV=1	8	Carbamidomethyl, Gln->pyro-Glu, Carbamyl, Carboxymethyl, Oxidation	9.2	16.9	2	413.0 (M:413.0)	51.0	11.16	146
147		true	sp|Q9XSJ4|ENOA_BOVIN	Alpha-enolase OS=Bos taurus GN=ENO1 PE=1 SV=4	9	Carbamidomethyl, Carbamyl, Oxidation, Phospho	6.4	47.3	4	411.5 (M:411.5)	25.6	34.27	147
148		true	sp|Q3MHN2|CO9_BOVIN	Complement component C9 OS=Bos taurus GN=C9 PE=2 SV=1	8	Carbamidomethyl, Carboxymethyl	5.7	62.0	1	411.4 (M:411.4)	21.4	11.20	148
149		true	sp|P0CB32|HS71L_BOVIN	Heat shock 70 kDa protein 1-like OS=Bos taurus GN=HSPA1L PE=3 SV=1	8	Carbamyl, Phospho	5.9	70.3	4	411.4 (M:411.4)	15.0	35.84	149
150		true	tr|Q17QL7|Q17QL7_BOVIN	KRT15 protein OS=Bos taurus GN=KRT15 PE=2 SV=2	8	Gln->pyro-Glu, Carbamyl, Phospho	4.8	49.0	3	411.2 (M:411.2)	14.8	14.46	150
151		true	tr|A5D9D2|A5D9D2_BOVIN	Complement component 4 binding protein, alpha chain OS=Bos taurus GN=C4BPA PE=2 SV=1	11	Carbamidomethyl, Carbamyl, Carboxymethyl, Phospho	6.0	68.9	3	410.3 (M:410.3)	25.6	19.25	151
152		true	tr|G3X7D2|G3X7D2_BOVIN	Chitinase-3-like protein 1 OS=Bos taurus GN=CHI3L1 PE=1 SV=1	5	Carbamidomethyl	8.7	43.7	2	407.3 (M:407.3)	16.4	12.37	152
153		true	tr|A1L528|A1L528_BOVIN	RAB1A, member RAS oncogene family OS=Bos taurus GN=RAB1A PE=2 SV=1	7	Gln->pyro-Glu, Phospho	5.9	22.7	14	406.6 (M:406.6)	34.1	10.88	153
154		true	sp|P79345|NPC2_BOVIN	Epididymal secretory protein E1 OS=Bos taurus GN=NPC2 PE=1 SV=1	9	Carbamidomethyl, Oxidation, Glu->pyro-Glu	8.2	16.6	1	406.3 (M:406.3)	46.3	11.73	154
155		true	sp|Q2HJH2|RAB1B_BOVIN	Ras-related protein Rab-1B OS=Bos taurus GN=RAB1B PE=2 SV=1	6	Gln->pyro-Glu, Carbamyl, Oxidation	5.6	22.2	2	403.4 (M:403.4)	28.4	11.46	155
156		true	sp|Q32KV6|SIL1_BOVIN	Nucleotide exchange factor SIL1 OS=Bos taurus GN=SIL1 PE=2 SV=1	8	Phospho	5.5	52.5	1	402.2 (M:402.2)	17.3	9.89	156
157		true	sp|Q0IIG8|RAB18_BOVIN	Ras-related protein Rab-18 OS=Bos taurus GN=RAB18 PE=2 SV=1	7	Carbamidomethyl	5.1	23.0	1	400.9 (M:400.9)	43.7	10.90	157
158		true	sp|Q0II59|PDXK_BOVIN	Pyridoxal kinase OS=Bos taurus GN=PDXK PE=2 SV=1	6		5.6	34.8	1	400.8 (M:400.8)	27.9	10.74	158
159		true	sp|Q95M18|ENPL_BOVIN	Endoplasmin OS=Bos taurus GN=HSP90B1 PE=2 SV=1	7	Carbamyl, Oxidation, Phospho	4.8	92.4	1	397.3 (M:397.3)	9.6	10.53	159
160		true	sp|P0C6X0|R1AB_CVBQ	Replicase polyprotein 1ab OS=Bovine coronavirus (strain Quebec) GN=rep PE=3 SV=1	8	Carbamidomethyl, Gln->pyro-Glu, Carbamyl, Carboxymethyl, Oxidation, Phospho	6.4	792.2	6	394.7 (M:394.7)	1.0	512.12	160
161		true	tr|Q0V7N2|Q0V7N2_BOVIN	Complement C2 OS=Bos taurus GN=C2 PE=2 SV=1	6	Carbamidomethyl, Carbamyl, Phospho	8.7	86.9	3	392.9 (M:392.9)	10.0	11.41	161
162		true	sp|P62261|1433E_BOVIN	14-3-3 protein epsilon OS=Bos taurus GN=YWHAE PE=2 SV=1	8	Carbamyl, Oxidation, Phospho	4.6	29.2	1	392.6 (M:392.6)	31.4	10.31	162
163		true	sp|P68252|1433G_BOVIN	14-3-3 protein gamma OS=Bos taurus GN=YWHAG PE=1 SV=2	7	Carbamidomethyl, Carbamyl, Carboxymethyl, Oxidation, Phospho	4.8	28.2	2	387.4 (M:387.4)	28.7	10.98	163
164		true	sp|P17690|APOH_BOVIN	Beta-2-glycoprotein 1 OS=Bos taurus GN=APOH PE=1 SV=4	7	Carbamidomethyl	8.5	38.2	2	385.8 (M:385.8)	32.2	11.36	164
165		true	tr|F1MMP5|F1MMP5_BOVIN	Inter-alpha-trypsin inhibitor heavy chain H1 OS=Bos taurus GN=ITIH1 PE=4 SV=1	8	Carbamidomethyl	6.7	101.2	2	383.5 (M:383.5)	11.4	11.07	165
166		true	tr|G3MXR2|G3MXR2_BOVIN	Uncharacterized protein OS=Bos taurus GN=MUC16 PE=4 SV=1	9	Carbamidomethyl, Carbamyl, Phospho	8.8	146.7	2	381.6 (M:381.6)	7.9	12.48	166
167		true	sp|P0C6W7|R1AB_CVBEN	Replicase polyprotein 1ab OS=Bovine coronavirus (strain 98TXSF-110-ENT) GN=rep PE=3 SV=1	8	Carbamidomethyl, Gln->pyro-Glu, Carbamyl, Carboxymethyl, Oxidation, Phospho	6.4	796.7	2	378.9 (M:378.9)	1.1	230.91	167
168		true	sp|Q2KIS7|TETN_BOVIN	Tetranectin OS=Bos taurus GN=CLEC3B PE=2 SV=1	6	Carbamidomethyl	5.5	22.1	1	377.0 (M:377.0)	42.6	11.46	168
169		true	tr|E7E1Q8|E7E1Q8_BOVIN	Beta-lactoglobulin (Fragment) OS=Bos taurus GN=LGB PE=4 SV=1	7	Carbamyl, Phospho	4.4	4.2	2	374.0 (M:374.0)	41.7	545.63	169
170		true	tr|A0A0F6QMJ3|A0A0F6QMJ3_BOVIN	Complement component 5 OS=Bos taurus GN=C5 PE=2 SV=1	8	Carbamidomethyl, Carbamyl, Carboxymethyl, Oxidation, Phospho	6.2	188.7	2	373.1 (M:373.1)	5.8	190.68	170
171		true	sp|P05689|CATZ_BOVIN	Cathepsin Z OS=Bos taurus GN=CTSZ PE=2 SV=2	7	Carbamidomethyl, Carboxymethyl	6.5	33.9	2	372.5 (M:372.5)	29.6	299.01	171
172		true	tr|M0QVY0|M0QVY0_BOVIN	Uncharacterized protein OS=Bos taurus GN=KRT6A PE=3 SV=1	7	Carbamidomethyl, Carbamyl, Phospho	8.3	60.8	7	372.2 (M:372.2)	12.4	11.42	172
173		true	sp|Q5E9B1|LDHB_BOVIN	L-lactate dehydrogenase B chain OS=Bos taurus GN=LDHB PE=2 SV=4	8	Carbamidomethyl, Carbamyl, Oxidation, Phospho	6.0	36.7	9	371.0 (M:371.0)	27.5	10.33	173
174		true	sp|A5D7D1|ACTN4_BOVIN	Alpha-actinin-4 OS=Bos taurus GN=ACTN4 PE=2 SV=1	8		5.3	104.9	1	369.8 (M:369.8)	10.1	9.95	174
175		true	tr|G3MZC1|G3MZC1_BOVIN	5'-nucleotidase (Fragment) OS=Bos taurus GN=NT5E PE=4 SV=1	7	Carbamidomethyl, Carbamyl, Phospho	6.7	36.0	1	369.7 (M:369.7)	20.7	10.68	175
176		true	tr|A7E3W4|A7E3W4_BOVIN	Transketolase OS=Bos taurus GN=TKT PE=2 SV=1	8	Carbamyl	6.7	64.8	4	369.1 (M:369.1)	15.4	17.57	176
177		true	tr|G8JKW7|G8JKW7_BOVIN	Uncharacterized protein OS=Bos taurus GN=SERPINA3 PE=3 SV=1	8	Carbamyl, Phospho	6.3	46.3	2	368.5 (M:368.5)	22.8	11.57	177
178		true	sp|Q3ZBD7|G6PI_BOVIN	Glucose-6-phosphate isomerase OS=Bos taurus GN=GPI PE=2 SV=4	6	Carbamyl, Phospho	7.3	62.8	1	368.4 (M:368.4)	12.9	10.52	178
179		true	sp|A2I7N1|SPA35_BOVIN	Serpin A3-5 OS=Bos taurus GN=SERPINA3-5 PE=3 SV=1	7	Carbamyl	6.5	46.4	1	365.8 (M:365.8)	17.3	12.40	179
180		true	sp|A8YXY3|SEP15_BOVIN	15 kDa selenoprotein OS=Bos taurus GN=SEP15 PE=2 SV=2	4	Carbamidomethyl, Phospho	5.1	18.0	2	364.5 (M:364.5)	25.3	11.65	180
181		true	tr|F1MX50|F1MX50_BOVIN	Uncharacterized protein OS=Bos taurus GN=CREG1 PE=4 SV=1	8	Carbamidomethyl, Carbamyl, Oxidation	6.9	23.9	2	362.0 (M:362.0)	38.9	11.16	181
182		true	tr|F1MGT1|F1MGT1_BOVIN	Uncharacterized protein (Fragment) OS=Bos taurus GN=SYNE1 PE=4 SV=2	12	Carbamidomethyl, Carbamyl, Oxidation, Phospho	5.4	1004.5	3	361.7 (M:361.7)	1.5	261.45	182
183		true	sp|P63103|1433Z_BOVIN	14-3-3 protein zeta/delta OS=Bos taurus GN=YWHAZ PE=1 SV=1	8	Carbamidomethyl, Carbamyl, Oxidation, Phospho	4.7	27.7	2	361.6 (M:361.6)	29.8	14.77	183
184		true	tr|Q32T06|Q32T06_BOVIN	Endopin 2C OS=Bos taurus PE=2 SV=1	8	Carbamyl	6.0	46.7	2	359.1 (M:359.1)	22.0	11.09	184
185		true	sp|Q28034|GLU2B_BOVIN	Glucosidase 2 subunit beta OS=Bos taurus GN=PRKCSH PE=2 SV=1	8	Carbamidomethyl, Carbamyl, Phospho	4.4	60.1	1	356.9 (M:356.9)	20.8	11.66	185
186		true	sp|P07688|CATB_BOVIN	Cathepsin B OS=Bos taurus GN=CTSB PE=1 SV=5	8	Carbamidomethyl	5.7	36.6	2	355.9 (M:355.9)	32.2	11.87	186
187		true	sp|P62157|CALM_BOVIN	Calmodulin OS=Bos taurus GN=CALM PE=1 SV=2	8	Phospho	4.1	16.8	4	355.0 (M:355.0)	53.0	9.78	187
188		true	tr|B9TUB7|B9TUB7_BOBOX	Cathelicidin 2 (Fragment) OS=Bos indicus x Bos taurus PE=4 SV=1	6	Carbamidomethyl, Gln->pyro-Glu, Carbamyl, Phospho	7.6	18.1	5	352.1 (M:352.1)	51.6	12.72	188
189		true	tr|F1N2R1|F1N2R1_BOVIN	Uncharacterized protein OS=Bos taurus GN=STOM PE=4 SV=2	5	Carbamyl, Oxidation, Phospho	6.6	31.3	2	350.2 (M:350.2)	19.7	250.69	189
190		true	sp|P31976|EZRI_BOVIN	Ezrin OS=Bos taurus GN=EZR PE=1 SV=2	7	Gln->pyro-Glu	6.1	68.7	1	349.8 (M:349.8)	10.5	11.19	190
191		true	tr|E1B748|E1B748_BOVIN	Uncharacterized protein OS=Bos taurus GN=HYOU1 PE=3 SV=1	11	Carbamyl, Oxidation, Phospho, Glu->pyro-Glu	5.3	111.6	1	348.5 (M:348.5)	11.5	271.12	191
192		true	tr|Q8JTP6|Q8JTP6_LSDV	LW134b OS=Lumpy skin disease virus GN=LW134b PE=4 SV=1	10	Carbamidomethyl, Carbamyl, Carboxymethyl, Oxidation, Phospho	6.1	141.7	1	348.4 (M:348.4)	5.0	21070.94	192
193		true	sp|P08037-2|B4GT1_BOVIN	Isoform Short of Beta-1,4-galactosyltransferase 1 OS=Bos taurus GN=B4GALT1	8	Carbamidomethyl, Gln->pyro-Glu, Carbamyl, Oxidation	9.3	43.5	2	345.5 (M:345.5)	14.4	31.10	193
194		true	tr|Q3SX32|Q3SX32_BOVIN	Mannose 6 phosphate receptor binding protein 1 OS=Bos taurus GN=M6PRBP1 PE=2 SV=1	9	Carbamidomethyl, Gln->pyro-Glu, Carbamyl, Phospho	5.8	47.6	1	342.8 (M:342.8)	23.1	265.71	194
195		true	tr|Q5GN72|Q5GN72_BOVIN	Alpha-1 acid glycoprotein OS=Bos taurus GN=agp PE=2 SV=2	7	Carbamidomethyl, Phospho	5.5	23.1	2	341.1 (M:341.1)	34.7	11.77	195
196		true	tr|E1B7E3|E1B7E3_BOVIN	Uncharacterized protein OS=Bos taurus GN=GOLGA4 PE=4 SV=2	12	Carbamidomethyl, Carbamyl, Carboxymethyl, Oxidation, Phospho, Glu->pyro-Glu	5.2	259.0	1	340.5 (M:340.5)	3.6	617.24	196
197		true	sp|Q05927|5NTD_BOVIN	5'-nucleotidase OS=Bos taurus GN=NT5E PE=1 SV=2	7	Carbamidomethyl, Carbamyl, Phospho	6.5	62.9	2	338.2 (M:338.2)	10.6	11.42	197
198		true	tr|F1MJK3|F1MJK3_BOVIN	Uncharacterized protein OS=Bos taurus GN=LOC506828 PE=4 SV=2	6	Carbamidomethyl, Carbamyl, Carboxymethyl, Phospho	6.8	165.5	2	337.2 (M:337.2)	4.6	10.44	198
199		true	tr|E1BF59|E1BF59_BOVIN	Uncharacterized protein OS=Bos taurus GN=PLEC PE=4 SV=2	5	Gln->pyro-Glu, Carbamyl, Oxidation, Phospho	5.8	527.3	1	336.4 (M:336.4)	1.3	289.01	199
200		true	tr|E1BMG2|E1BMG2_BOVIN	Uncharacterized protein OS=Bos taurus GN=DNAH5 PE=4 SV=2	15	Carbamyl, Oxidation, Phospho, Glu->pyro-Glu	5.8	529.9	1	336.2 (M:336.2)	2.8	546.28	200
201		true	tr|F1MU12|F1MU12_BOVIN	Keratin, type II cytoskeletal 8 OS=Bos taurus GN=KRT8 PE=3 SV=1	8	Carbamyl, Oxidation, Phospho	5.8	53.5	3	335.8 (M:335.8)	15.7	10.42	201
202		true	tr|A0A059U1M0|A0A059U1M0_BVDV	Genome polyprotein OS=Bovine viral diarrhea virus PE=4 SV=1	8	Carbamidomethyl, Carbamyl, Carboxymethyl, Oxidation, Phospho	8.8	438.0	49	334.8 (M:334.8)	2.8	357.65	202
203		true	tr|A4ZZF8|A4ZZF8_BOVIN	Alpha-actinin 1 OS=Bos taurus GN=ACTN1 PE=2 SV=1	7	Carbamidomethyl, Carbamyl, Carboxymethyl, Phospho	5.2	102.8	2	334.3 (M:334.3)	10.0	10.46	203
204		true	tr|Q862Q3|Q862Q3_BOVIN	Similar to beta 2-microglobulin (Fragment) OS=Bos taurus PE=2 SV=1	5	Carbamyl	7.1	11.0	4	333.0 (M:333.0)	31.2	10.31	204
205		true	tr|E1BKT9|E1BKT9_BOVIN	Uncharacterized protein OS=Bos taurus GN=DSP PE=4 SV=1	13	Carbamidomethyl, Gln->pyro-Glu, Carbamyl, Carboxymethyl, Oxidation, Phospho	6.5	332.2	1	332.4 (M:332.4)	2.9	571.30	205
206		true	tr|J9UDR5|J9UDR5_BVDV	Genome polyprotein OS=Bovine viral diarrhea virus PE=4 SV=1	8	Carbamidomethyl, Carbamyl, Carboxymethyl, Oxidation, Phospho	8.8	437.8	30	331.9 (M:331.9)	2.3	616.61	206
207		true	tr|A5D7R6|A5D7R6_BOVIN	ITIH2 protein OS=Bos taurus GN=ITIH2 PE=2 SV=1	7	Carbamyl, Oxidation, Phospho	7.9	106.1	2	330.3 (M:330.3)	10.3	10.12	207
208		true	sp|P54228|CTHL6_BOVIN	Cathelicidin-6 OS=Bos taurus GN=CATHL6 PE=1 SV=1	7	Carbamidomethyl, Gln->pyro-Glu, Carbamyl, Phospho	9.4	17.8	5	329.5 (M:329.5)	38.0	12.63	208
209		true	tr|F1MUP9|F1MUP9_BOVIN	Uncharacterized protein OS=Bos taurus GN=VAT1 PE=4 SV=2	6	Carbamidomethyl, Carboxymethyl, Oxidation	6.0	42.8	1	328.2 (M:328.2)	21.9	11.09	209
210		true	tr|F1MC11|F1MC11_BOVIN	Keratin, type I cytoskeletal 14 OS=Bos taurus GN=KRT14 PE=3 SV=2	9	Carbamyl, Phospho	5.1	51.9	4	327.7 (M:327.7)	21.2	13.18	210
211		true	sp|Q3ZBZ1|CAB45_BOVIN	45 kDa calcium-binding protein OS=Bos taurus GN=SDF4 PE=2 SV=1	7	Oxidation	4.8	41.1	2	326.5 (M:326.5)	21.4	10.53	211
212		true	sp|Q6TQR6|L_CCHFI	RNA-directed RNA polymerase L OS=Crimean-Congo hemorrhagic fever virus (strain Nigeria/IbAr10200/1970) GN=L PE=1 SV=2	9	Carbamidomethyl, Carbamyl, Carboxymethyl, Oxidation, Phospho, Glu->pyro-Glu	7.6	447.6	1	326.2 (M:326.2)	2.8	318.26	212
213		true	tr|G3MXL3|G3MXL3_BOVIN	Uncharacterized protein (Fragment) OS=Bos taurus GN=KRT3 PE=3 SV=1	6	Carbamidomethyl, Carbamyl	5.8	62.9	1	323.9 (M:323.9)	8.1	11.74	213
214		true	sp|P29392|SPAD1_BOVIN	Spermadhesin-1 OS=Bos taurus GN=SPADH1 PE=1 SV=1	5	Carbamidomethyl	5.1	15.0	2	321.5 (M:321.5)	52.2	11.45	214
215		true	tr|F1N1F8|F1N1F8_BOVIN	Uncharacterized protein OS=Bos taurus GN=CENPF PE=4 SV=2	7	Carbamidomethyl, Carbamyl, Oxidation, Phospho, Glu->pyro-Glu	5.0	353.0	1	319.7 (M:319.7)	2.3	228.12	215
216		true	tr|O11993|O11993_BVDV	Pestivirus type 1 cytopathic genomic RNA, complete genome OS=Bovine viral diarrhea virus PE=4 SV=1	9	Carbamidomethyl, Carbamyl, Carboxymethyl, Oxidation, Phospho	9.1	558.5	14	319.0 (M:319.0)	2.3	22.12	216
217		true	sp|A2I7N0|SPA34_BOVIN	Serpin A3-4 OS=Bos taurus GN=SERPINA3-4 PE=3 SV=1	6		5.9	46.3	4	318.9 (M:318.9)	13.9	11.53	217
218		true	tr|E1BNF6|E1BNF6_BOVIN	Uncharacterized protein (Fragment) OS=Bos taurus GN=SPEN PE=4 SV=2	9	Carbamyl, Oxidation, Phospho, Glu->pyro-Glu	7.4	401.4	3	318.7 (M:318.7)	2.4	645.38	218
219		true	sp|P42916|CL43_BOVIN	Collectin-43 OS=Bos taurus GN=CL43 PE=1 SV=2	6	Carbamidomethyl	5.0	33.6	1	317.4 (M:317.4)	24.0	11.94	219
220		true	tr|E1BKN6|E1BKN6_BOVIN	Uncharacterized protein OS=Bos taurus GN=ANKRD12 PE=4 SV=1	6	Carbamidomethyl, Gln->pyro-Glu, Carbamyl, Carboxymethyl, Phospho	6.5	233.0	1	311.1 (M:311.1)	3.0	702.08	220
221		true	tr|K9ZRL4|K9ZRL4_BOBOX	Heat shock 70kDa protein 1A OS=Bos indicus x Bos taurus GN=HSPA1A PE=2 SV=1	8	Carbamyl, Phospho	5.5	70.2	6	310.9 (M:310.9)	14.2	35.72	221
222		true	sp|Q5E956|TPIS_BOVIN	Triosephosphate isomerase OS=Bos taurus GN=TPI1 PE=2 SV=3	6	Carbamidomethyl	6.4	26.7	1	309.1 (M:309.1)	30.5	10.61	222
223		true	sp|P61585|RHOA_BOVIN	Transforming protein RhoA OS=Bos taurus GN=RHOA PE=1 SV=1	5	Carbamidomethyl, Carbamyl	5.8	21.8	4	308.5 (M:308.5)	32.1	10.69	223
224		true	sp|Q9TTE1|SPA31_BOVIN	Serpin A3-1 OS=Bos taurus GN=SERPINA3-1 PE=1 SV=3	5		5.7	46.2	4	307.9 (M:307.9)	12.9	22.83	224
225		true	sp|P80311|PPIB_BOVIN	Peptidyl-prolyl cis-trans isomerase B OS=Bos taurus GN=PPIB PE=1 SV=4	8	Carbamidomethyl, Carbamyl, Phospho	9.3	23.7	3	306.8 (M:306.8)	32.4	193.63	225
226		true	sp|P07224|PROS_BOVIN	Vitamin K-dependent protein S OS=Bos taurus GN=PROS1 PE=1 SV=1	7	Carbamidomethyl, Carbamyl, Oxidation, Phospho	5.3	75.1	1	306.5 (M:306.5)	11.3	9.93	226
227		true	tr|F1N7D7|F1N7D7_BOVIN	Dystroglycan OS=Bos taurus GN=DAG1 PE=4 SV=1	8	Carbamidomethyl, Carbamyl, Carboxymethyl	8.6	97.2	2	306.3 (M:306.3)	9.2	334.75	227
228		true	tr|F1MDT8|F1MDT8_BOVIN	Uncharacterized protein (Fragment) OS=Bos taurus GN=SETD2 PE=4 SV=2	8	Carbamidomethyl, Carbamyl, Carboxymethyl, Phospho, Glu->pyro-Glu	6.1	283.9	1	305.7 (M:305.7)	2.8	793.73	228
229		true	tr|A0A0E3MW13|A0A0E3MW13_BVDV	Genome polyprotein OS=Bovine viral diarrhea virus PE=4 SV=1	7	Carbamidomethyl, Carbamyl, Carboxymethyl, Oxidation, Phospho	8.8	437.9	1	304.6 (M:304.6)	2.4	233.06	229
230		true	tr|E1BGW1|E1BGW1_BOVIN	Mucin-15 OS=Bos taurus GN=MUC15 PE=4 SV=2	6	Oxidation	4.9	35.7	5	302.0 (M:302.0)	19.7	11.89	230
231		true	tr|C6KEF7|C6KEF7_BOVIN	Myostatin OS=Bos taurus GN=MSTN PE=2 SV=1	6	Carbamidomethyl, Carbamyl, Oxidation, Phospho	6.1	42.5	6	301.8 (M:301.8)	18.1	10.92	231
232		true	sp|Q3MHP2|RB11B_BOVIN	Ras-related protein Rab-11B OS=Bos taurus GN=RAB11B PE=2 SV=3	6		5.6	24.5	3	298.4 (M:298.4)	29.4	10.60	232
233		true	tr|E1BA80|E1BA80_BOVIN	Uncharacterized protein OS=Bos taurus GN=MYO18B PE=4 SV=2	5	Carbamidomethyl, Carbamyl, Carboxymethyl, Oxidation, Phospho, Glu->pyro-Glu	6.5	278.0	1	296.3 (M:296.3)	2.1	603.30	233
234		true	tr|E1BG25|E1BG25_BOVIN	Uncharacterized protein OS=Bos taurus GN=MFI2 PE=3 SV=1	7	Carbamidomethyl, Carbamyl, Carboxymethyl, Oxidation, Phospho	5.5	80.6	1	296.1 (M:296.1)	11.9	174.70	234
235		true	tr|G3MYZ3|G3MYZ3_BOVIN	Uncharacterized protein OS=Bos taurus GN=AFM PE=4 SV=1	8	Carbamidomethyl, Carbamyl, Carboxymethyl, Oxidation, Glu->pyro-Glu	5.6	69.5	1	294.0 (M:294.0)	14.9	20.55	235
236		true	sp|P62935|PPIA_BOVIN	Peptidyl-prolyl cis-trans isomerase A OS=Bos taurus GN=PPIA PE=1 SV=2	7	Carbamidomethyl, Oxidation, Glu->pyro-Glu	8.3	17.9	7	290.8 (M:290.8)	26.8	11.85	236
237		true	sp|Q2KJ32|SBP1_BOVIN	Selenium-binding protein 1 OS=Bos taurus GN=SELENBP1 PE=1 SV=1	7	Carbamyl, Phospho, Glu->pyro-Glu	6.0	52.5	1	289.6 (M:289.6)	16.9	149.13	237
238		true	tr|F1MD77|F1MD77_BOVIN	Uncharacterized protein OS=Bos taurus GN=LAMC1 PE=4 SV=2	7	Carbamidomethyl, Carbamyl, Carboxymethyl	5.0	177.6	1	289.5 (M:289.5)	6.0	11.82	238
239		true	sp|O46375|TTHY_BOVIN	Transthyretin OS=Bos taurus GN=TTR PE=1 SV=1	4		5.9	15.7	1	286.3 (M:286.3)	30.6	12.49	239
240		true	tr|W8EAE0|W8EAE0_BVDV	Genome polyprotein OS=Bovine viral diarrhea virus PE=4 SV=1	6	Carbamidomethyl, Carbamyl, Oxidation, Phospho	8.9	438.5	15	286.3 (M:286.3)	1.8	33.60	240
241		true	tr|F1MEB1|F1MEB1_BOVIN	Uncharacterized protein OS=Bos taurus GN=BDP1 PE=4 SV=2	6	Carbamidomethyl, Carbamyl, Carboxymethyl, Oxidation, Phospho, Glu->pyro-Glu	4.9	293.3	1	285.0 (M:285.0)	1.9	219.46	241
242		true	sp|Q3ZCJ8|CATC_BOVIN	Dipeptidyl peptidase 1 OS=Bos taurus GN=CTSC PE=2 SV=1	5	Carbamidomethyl, Carbamyl, Carboxymethyl	7.5	51.9	3	283.0 (M:283.0)	15.3	16007.13	242
243		true	tr|F1MVI7|F1MVI7_BOVIN	Uncharacterized protein (Fragment) OS=Bos taurus GN=TRANK1 PE=4 SV=2	9	Carbamidomethyl, Carbamyl, Oxidation, Phospho	6.1	326.6	2	282.7 (M:282.7)	2.8	633.54	243
244		true	tr|F1N032|F1N032_BOVIN	Uncharacterized protein OS=Bos taurus GN=DENND4C PE=4 SV=2	8	Carbamidomethyl, Gln->pyro-Glu, Carbamyl, Carboxymethyl, Oxidation, Phospho, Glu->pyro-Glu	6.1	216.1	1	282.5 (M:282.5)	4.1	719.27	244
245		true	sp|P33046|CTHL4_BOVIN	Cathelicidin-4 OS=Bos taurus GN=CATHL4 PE=1 SV=1	5	Carbamidomethyl, Carbamyl	6.3	16.5	1	281.4 (M:281.4)	31.2	10.60	245
246		true	tr|F1N272|F1N272_BOVIN	Uncharacterized protein (Fragment) OS=Bos taurus GN=ATP13A4 PE=3 SV=1	7	Carbamidomethyl, Carbamyl, Carboxymethyl, Phospho, Glu->pyro-Glu	7.6	133.8	1	281.4 (M:281.4)	5.8	10.96	246
247		true	tr|F1MKE7|F1MKE7_BOVIN	Uncharacterized protein (Fragment) OS=Bos taurus PE=3 SV=2	5	Carbamidomethyl, Carbamyl, Phospho	8.8	56.6	1	279.7 (M:279.7)	9.2	302.53	247
248		true	tr|F1MM86|F1MM86_BOVIN	Complement component C6 OS=Bos taurus GN=C6 PE=4 SV=1	7	Carbamidomethyl, Carboxymethyl, Phospho	6.7	104.5	2	278.5 (M:278.5)	7.6	26.47	248
249		true	sp|Q5E9I6|ARF3_BOVIN	ADP-ribosylation factor 3 OS=Bos taurus GN=ARF3 PE=2 SV=3	5	Gln->pyro-Glu, Oxidation	6.8	20.6	6	277.5 (M:277.5)	32.0	9.79	249
250		true	tr|Q807Z9|Q807Z9_BVDV	Genome polyprotein OS=Bovine viral diarrhea virus PE=4 SV=1	7	Carbamidomethyl, Carbamyl, Carboxymethyl, Oxidation, Phospho, Glu->pyro-Glu	8.9	472.0	1	277.0 (M:277.0)	2.2	414.53	250
251		true	sp|G7H7V7|TOPZ1_BOVIN	Testis- and ovary-specific PAZ domain-containing protein 1 OS=Bos taurus GN=TOPAZ1 PE=2 SV=1	7	Carbamidomethyl, Carbamyl, Oxidation, Phospho	8.3	185.6	2	273.3 (M:273.3)	4.4	354.83	251
252		true	tr|F1MQI1|F1MQI1_BOVIN	Uncharacterized protein OS=Bos taurus GN=TLN2 PE=4 SV=2	9	Carbamidomethyl, Carbamyl, Carboxymethyl, Oxidation, Phospho, Glu->pyro-Glu	5.4	271.3	1	273.1 (M:273.1)	4.2	463.18	252
253		true	sp|P61223|RAP1B_BOVIN	Ras-related protein Rap-1b OS=Bos taurus GN=RAP1B PE=2 SV=1	5	Carbamidomethyl, Carbamyl, Phospho	5.6	20.8	2	273.0 (M:273.0)	28.3	14.09	253
254		true	tr|F1MJN1|F1MJN1_BOVIN	Uncharacterized protein (Fragment) OS=Bos taurus GN=ZNF318 PE=4 SV=2	9	Carbamidomethyl, Carbamyl, Carboxymethyl, Oxidation, Phospho, Glu->pyro-Glu	6.3	241.9	2	272.5 (M:272.5)	4.1	40.44	254
255		true	tr|A0A0E3KDE5|A0A0E3KDE5_BVDV	Genome polyprotein OS=Bovine viral diarrhea virus PE=4 SV=1	5	Carbamidomethyl, Carbamyl, Carboxymethyl, Oxidation, Phospho, Glu->pyro-Glu	8.8	438.2	2	269.6 (M:269.6)	1.5	33.69	255
256		true	tr|F1MMK9|F1MMK9_BOVIN	Protein AMBP OS=Bos taurus GN=AMBP PE=4 SV=2	6	Carbamidomethyl, Carbamyl, Oxidation	8.1	39.3	2	269.2 (M:269.2)	18.2	11.22	256
257		true	tr|I1XC72|I1XC72_BVDV	Genome polyprotein OS=Bovine viral diarrhea virus PE=4 SV=1	9	Carbamidomethyl, Carbamyl, Carboxymethyl, Oxidation, Phospho	8.8	439.5	1	268.9 (M:268.9)	2.6	513.99	257
258		true	tr|G3N309|G3N309_BOVIN	Uncharacterized protein (Fragment) OS=Bos taurus GN=DNAH8 PE=4 SV=1	7	Carbamyl, Oxidation, Phospho	6.1	529.1	2	267.7 (M:267.7)	1.8	328.54	258
259		true	sp|Q27968|DNJC3_BOVIN	DnaJ homolog subfamily C member 3 OS=Bos taurus GN=DNAJC3 PE=1 SV=1	6	Carbamidomethyl, Carbamyl, Oxidation, Phospho	5.6	57.7	2	264.7 (M:264.7)	14.3	11.21	259
260		true	tr|F1MCK2|F1MCK2_BOVIN	Uncharacterized protein OS=Bos taurus GN=AHNAK PE=4 SV=2	7	Carbamidomethyl, Carbamyl, Carboxymethyl, Oxidation, Phospho	5.7	586.6	1	264.3 (M:264.3)	1.4	713.69	260
261		true	sp|P08728|K1C19_BOVIN	Keratin, type I cytoskeletal 19 OS=Bos taurus GN=KRT19 PE=2 SV=1	7	Phospho	4.9	43.9	1	264.2 (M:264.2)	16.0	18.58	261
262		true	tr|F1N401|F1N401_BOVIN	Collagen alpha-1(XII) chain OS=Bos taurus GN=COL12A1 PE=4 SV=2	8	Carbamyl, Oxidation, Phospho	5.4	339.9	1	263.4 (M:263.4)	2.4	32.78	262
263		true	tr|E1BPD7|E1BPD7_BOVIN	Uncharacterized protein OS=Bos taurus GN=MKI67 PE=4 SV=1	9	Carbamidomethyl, Carbamyl, Carboxymethyl, Phospho, Glu->pyro-Glu	9.7	357.3	2	261.6 (M:261.6)	2.8	792.27	263
264		true	sp|P34955|A1AT_BOVIN	Alpha-1-antiproteinase OS=Bos taurus GN=SERPINA1 PE=1 SV=1	6		6.1	46.1	1	261.1 (M:261.1)	16.3	10.72	264
265		true	sp|P0C6V8|R1AB_BRV1	Replicase polyprotein 1ab OS=Breda virus 1 GN=rep PE=2 SV=1	8	Carbamidomethyl, Gln->pyro-Glu, Carbamyl, Carboxymethyl, Oxidation, Phospho	6.1	765.5	1	261.0 (M:261.0)	1.1	559.18	265
266		true	tr|F1MKS5|F1MKS5_BOVIN	Histidine-rich glycoprotein OS=Bos taurus GN=HRG PE=4 SV=2	6	Carbamidomethyl	7.1	60.7	2	260.5 (M:260.5)	11.9	11.08	266
267		true	tr|E1BKC4|E1BKC4_BOVIN	Uncharacterized protein OS=Bos taurus GN=NIPBL PE=4 SV=2	8	Carbamidomethyl, Carbamyl, Carboxymethyl, Oxidation, Phospho	8.4	316.1	1	260.0 (M:260.0)	2.8	9091.36	267
268		true	tr|Q17QC7|Q17QC7_BOVIN	Poliovirus receptor-related 2 (Herpesvirus entry mediator B) OS=Bos taurus GN=PVRL2 PE=2 SV=1	5		5.9	43.2	2	258.7 (M:258.7)	19.6	10.47	268
269		true	tr|E1BED7|E1BED7_BOVIN	Uncharacterized protein (Fragment) OS=Bos taurus GN=HYDIN PE=4 SV=2	11	Carbamidomethyl, Carbamyl, Oxidation, Phospho, Glu->pyro-Glu	6.0	575.7	1	258.5 (M:258.5)	2.0	635.44	269
270		true	tr|A0A0A0MP89|A0A0A0MP89_BOVIN	Serpin A3-8 OS=Bos taurus GN=SERPINA3-8 PE=3 SV=1	6		5.8	46.9	2	258.2 (M:258.2)	18.9	12.37	270
271		true	tr|E1BNY9|E1BNY9_BOVIN	Uncharacterized protein OS=Bos taurus GN=HUWE1 PE=4 SV=2	10	Carbamidomethyl, Carbamyl, Carboxymethyl, Oxidation, Phospho	5.1	481.9	1	257.7 (M:257.7)	2.2	597.73	271
272		true	tr|R4VDL3|R4VDL3_BVDV	Genome polyprotein OS=Bovine viral diarrhea virus PE=4 SV=1	8	Carbamidomethyl, Carbamyl, Carboxymethyl, Oxidation, Phospho	8.8	437.3	12	256.5 (M:256.5)	2.6	12466.33	272
273		true	sp|P11151|LIPL_BOVIN	Lipoprotein lipase OS=Bos taurus GN=LPL PE=1 SV=2	6	Carbamidomethyl, Carbamyl, Carboxymethyl, Oxidation	8.8	53.3	1	256.0 (M:256.0)	14.6	11.94	273
274		true	tr|G3MXG3|G3MXG3_BOVIN	Uncharacterized protein OS=Bos taurus GN=CCDC88A PE=4 SV=1	3	Carbamyl, Oxidation, Phospho	5.8	207.9	3	255.0 (M:255.0)	1.1	59.14	274
275		true	tr|Q7M2Q9|Q7M2Q9_BOVIN	Rho protein GDP-dissociation inhibitor (Fragments) OS=Bos taurus PE=1 SV=1	4		4.4	8.1	3	254.8 (M:254.8)	80.6	11.75	275
276		true	tr|F1MYX9|F1MYX9_BOVIN	Uncharacterized protein OS=Bos taurus GN=LAMA4 PE=4 SV=2	5	Carbamyl, Oxidation	5.9	202.6	1	254.5 (M:254.5)	3.6	481.74	276
277		true	tr|G3MWW2|G3MWW2_BOVIN	Uncharacterized protein OS=Bos taurus GN=TET1 PE=4 SV=1	8	Carbamidomethyl, Carbamyl, Carboxymethyl, Oxidation, Phospho	8.1	231.6	2	253.5 (M:253.5)	3.5	631.21	277
278		true	tr|F1N6Y1|F1N6Y1_BOVIN	Uncharacterized protein OS=Bos taurus GN=GANAB PE=3 SV=1	5	Carbamidomethyl, Oxidation	5.8	109.4	2	252.9 (M:252.9)	6.9	11.01	278
279		true	tr|A0A0E3MY53|A0A0E3MY53_BVDV	Genome polyprotein OS=Bovine viral diarrhea virus PE=4 SV=1	7	Carbamidomethyl, Carbamyl, Carboxymethyl, Oxidation, Phospho	8.7	437.3	1	252.2 (M:252.2)	2.3	439.11	279
280		true	tr|E1BJH3|E1BJH3_BOVIN	Uncharacterized protein OS=Bos taurus GN=CNTRL PE=4 SV=2	8	Carbamyl, Oxidation, Phospho	5.5	269.4	1	252.1 (M:252.1)	3.7	502.30	280
281		true	tr|F1MSP8|F1MSP8_BOVIN	Uncharacterized protein (Fragment) OS=Bos taurus GN=DNAH10 PE=4 SV=2	4	Carbamidomethyl, Carbamyl, Oxidation, Phospho, Glu->pyro-Glu	5.4	513.9	1	251.8 (M:251.8)	0.7	56.62	281
282		true	tr|E1BCI2|E1BCI2_BOVIN	Uncharacterized protein OS=Bos taurus GN=RNF40 PE=4 SV=2	5	Carbamyl, Oxidation, Phospho, Glu->pyro-Glu	6.1	113.6	1	249.8 (M:249.8)	3.7	493.50	282
283		true	sp|P26779|SAP_BOVIN	Prosaposin OS=Bos taurus GN=PSAP PE=1 SV=3	4	Carbamidomethyl, Carbamyl, Phospho	5.1	58.0	4	249.2 (M:249.2)	10.7	11.85	283
284		true	tr|E1BKJ5|E1BKJ5_BOVIN	Uncharacterized protein OS=Bos taurus GN=TRRAP PE=4 SV=2	5	Carbamyl, Oxidation, Phospho	8.5	434.0	1	248.9 (M:248.9)	1.5	566.44	284
285		true	tr|E1BP55|E1BP55_BOVIN	Uncharacterized protein OS=Bos taurus GN=NAV3 PE=4 SV=2	8	Carbamyl, Oxidation, Phospho, Glu->pyro-Glu	8.7	246.9	1	247.1 (M:247.1)	3.7	357.46	285
286		true	tr|R9RYA5|R9RYA5_BVDV	Genome polyprotein OS=Bovine viral diarrhea virus PE=4 SV=1	3	Carbamidomethyl, Carbamyl, Carboxymethyl, Oxidation, Phospho	8.7	437.1	15	245.9 (M:245.9)	1.0	544.51	286
287		true	tr|E1BDX8|E1BDX8_BOVIN	Uncharacterized protein OS=Bos taurus GN=DYNC1H1 PE=4 SV=1	5	Carbamyl, Oxidation, Phospho	6.0	531.7	1	245.9 (M:245.9)	1.0	778.53	287
288		true	tr|F1MMR6|F1MMR6_BOVIN	Cathepsin D OS=Bos taurus GN=CTSD PE=3 SV=1	5	Carbamidomethyl, Phospho	7.6	44.7	4	245.5 (M:245.5)	14.6	10.88	288
289		true	sp|P22338|POLG_LIV	Genome polyprotein OS=Louping ill virus PE=3 SV=2	5	Carbamidomethyl, Carbamyl, Carboxymethyl, Oxidation, Phospho	8.6	378.2	12	244.9 (M:244.9)	1.6	17164.67	289
290		true	sp|Q3SZI4|1433T_BOVIN	14-3-3 protein theta OS=Bos taurus GN=YWHAQ PE=2 SV=1	5	Carbamidomethyl, Carbamyl, Oxidation	4.7	27.7	1	243.2 (M:243.2)	17.6	10.44	290
291		true	tr|E1BFN5|E1BFN5_BOVIN	Uncharacterized protein (Fragment) OS=Bos taurus GN=LOC100336868 PE=4 SV=2	6	Carbamidomethyl, Carbamyl, Carboxymethyl	8.3	78.3	1	242.7 (M:242.7)	11.4	11.34	291
292		true	sp|Q95122|CD14_BOVIN	Monocyte differentiation antigen CD14 OS=Bos taurus GN=CD14 PE=2 SV=2	5	Carbamidomethyl, Oxidation, Phospho	5.4	39.6	5	242.5 (M:242.5)	16.1	355.28	292
293		true	tr|A0A0E3MTK0|A0A0E3MTK0_BVDV	Genome polyprotein OS=Bovine viral diarrhea virus PE=4 SV=1	6	Carbamidomethyl, Carbamyl, Carboxymethyl, Oxidation, Phospho	8.8	437.1	11	241.8 (M:241.8)	1.8	42.80	293
294		true	tr|F1MRT9|F1MRT9_BOVIN	Uncharacterized protein (Fragment) OS=Bos taurus GN=UTRN PE=4 SV=2	10	Carbamyl, Oxidation, Phospho	5.2	389.3	1	241.6 (M:241.6)	3.4	514.49	294
295		true	tr|F1MJJ0|F1MJJ0_BOVIN	Uncharacterized protein OS=Bos taurus GN=DNAH9 PE=4 SV=2	10	Carbamidomethyl, Carbamyl, Carboxymethyl, Oxidation, Phospho, Glu->pyro-Glu	5.7	511.0	3	241.6 (M:241.6)	2.6	14871.42	295
296		true	tr|G1K122|G1K122_BOVIN	Retinol-binding protein 4 OS=Bos taurus GN=RBP4 PE=3 SV=1	5	Carbamidomethyl, Gln->pyro-Glu, Carbamyl	5.5	23.0	3	241.5 (M:241.5)	16.4	27.66	296
297		true	tr|E1BCZ2|E1BCZ2_BOVIN	Uncharacterized protein OS=Bos taurus GN=RBBP6 PE=4 SV=2	5	Carbamyl, Phospho	9.6	192.6	1	241.2 (M:241.2)	1.8	764.55	297
298		true	tr|E1BKZ5|E1BKZ5_BOVIN	Uncharacterized protein OS=Bos taurus GN=GOLGB1 PE=4 SV=2	5	Carbamidomethyl, Gln->pyro-Glu, Carbamyl, Carboxymethyl, Phospho, Glu->pyro-Glu	5.0	377.4	2	241.2 (M:241.2)	2.0	9448.11	298
299		true	tr|E1BPJ0|E1BPJ0_BOVIN	Uncharacterized protein OS=Bos taurus PE=4 SV=1	7	Carbamidomethyl, Carbamyl, Oxidation, Phospho, Glu->pyro-Glu	7.3	137.2	1	241.0 (M:241.0)	3.2	355.30	299
300		true	tr|E1BEW9|E1BEW9_BOVIN	Uncharacterized protein OS=Bos taurus GN=WDR87 PE=4 SV=2	5	Carbamidomethyl, Carbamyl, Oxidation, Phospho	5.9	333.9	1	240.8 (M:240.8)	1.6	462.05	300
301		true	tr|F1MPW8|F1MPW8_BOVIN	Uncharacterized protein OS=Bos taurus PE=4 SV=2	9	Carbamidomethyl, Carbamyl, Carboxymethyl, Phospho	5.9	393.8	2	240.1 (M:240.1)	2.6	202.80	301
302		true	tr|G3N0S9|G3N0S9_BOVIN	Uncharacterized protein OS=Bos taurus GN=LOC515150 PE=4 SV=1	5	Carbamidomethyl, Carbamyl, Carboxymethyl, Phospho	7.5	22.3	1	239.8 (M:239.8)	26.1	22424.46	302
303		true	sp|P17248|SYWC_BOVIN	Tryptophan--tRNA ligase, cytoplasmic OS=Bos taurus GN=WARS PE=1 SV=3	5	Carbamidomethyl, Carbamyl, Oxidation, Phospho	5.5	53.8	2	239.4 (M:239.4)	10.9	538.32	303
304		true	tr|E1BLI9|E1BLI9_BOVIN	Protein S100-A9 OS=Bos taurus GN=S100A9 PE=4 SV=2	3		6.3	16.4	3	239.2 (M:239.2)	19.7	10.90	304
305		true	tr|E1BPX1|E1BPX1_BOVIN	Uncharacterized protein OS=Bos taurus GN=VPS13C PE=4 SV=2	9	Carbamidomethyl, Carbamyl, Oxidation, Phospho, Glu->pyro-Glu	6.2	423.6	2	238.6 (M:238.6)	1.5	850.49	305
306		true	tr|Q9TS85|Q9TS85_BOVIN	Histidine-rich GLYCOPROTEIN=FACTOR XIIIA substrate (Fragments) OS=Bos taurus PE=1 SV=1	4	Carbamidomethyl	5.1	24.0	2	236.8 (M:236.8)	24.8	11.04	306
307		true	sp|P25975|CATL1_BOVIN	Cathepsin L1 OS=Bos taurus GN=CTSL PE=1 SV=3	4	Carbamidomethyl	6.6	37.3	3	235.8 (M:235.8)	15.9	11.48	307
308		true	tr|A8E4Q3|A8E4Q3_BOVIN	LOC511106 protein OS=Bos taurus GN=LOC511106 PE=2 SV=1	6	Carbamidomethyl, Carbamyl, Phospho	5.7	44.0	2	235.8 (M:235.8)	15.7	32.00	308
309		true	tr|F1MF54|F1MF54_BOVIN	Uncharacterized protein OS=Bos taurus GN=FAM179A PE=4 SV=2	8	Carbamyl, Oxidation, Phospho	9.6	110.8	2	235.5 (M:235.5)	6.2	404.56	309
310		true	sp|P46193|ANXA1_BOVIN	Annexin A1 OS=Bos taurus GN=ANXA1 PE=2 SV=2	6	Carbamyl	6.4	38.9	3	235.5 (M:235.5)	19.1	10.30	310
311		true	sp|Q95M12|LGMN_BOVIN	Legumain OS=Bos taurus GN=LGMN PE=1 SV=1	5	Carbamidomethyl	6.1	49.3	1	235.3 (M:235.3)	12.5	10.57	311
312		true	tr|F1MC13|F1MC13_BOVIN	Uncharacterized protein (Fragment) OS=Bos taurus GN=LAMA5 PE=4 SV=2	5	Carbamidomethyl, Gln->pyro-Glu, Carbamyl, Oxidation, Phospho	6.2	395.8	1	234.9 (M:234.9)	1.6	517.98	312
313		true	tr|A0A068L3P5|A0A068L3P5_BVDVN	Genome polyprotein (Fragment) OS=Bovine viral diarrhea virus (isolate NADL) PE=4 SV=1	6	Carbamidomethyl, Carbamyl, Oxidation, Phospho	8.7	316.1	1	234.7 (M:234.7)	2.4	46.36	313
314		true	tr|F1MNT5|F1MNT5_BOVIN	Uncharacterized protein OS=Bos taurus GN=MUC20 PE=4 SV=2	7	Carbamidomethyl, Carbamyl, Oxidation, Phospho, Glu->pyro-Glu	5.3	54.7	1	233.2 (M:233.2)	15.9	20.96	314
315		true	tr|F1N1K6|F1N1K6_BOVIN	Uncharacterized protein (Fragment) OS=Bos taurus GN=DNHD1 PE=4 SV=2	3	Carbamidomethyl, Carbamyl, Oxidation, Phospho, Glu->pyro-Glu	6.5	530.3	2	232.2 (M:232.2)	0.5	933.11	315
316		true	tr|E1BC24|E1BC24_BOVIN	Midasin OS=Bos taurus GN=MDN1 PE=3 SV=2	6	Carbamidomethyl, Carbamyl, Carboxymethyl, Oxidation, Phospho	5.4	630.3	1	231.1 (M:231.1)	1.1	507.44	316
317		true	tr|R9W356|R9W356_BVDV	Genome polyprotein OS=Bovine viral diarrhea virus PE=4 SV=1	7	Carbamidomethyl, Carbamyl, Carboxymethyl, Oxidation, Phospho	8.8	437.9	4	230.7 (M:230.7)	2.0	272.47	317
318		true	sp|P21856|GDIA_BOVIN	Rab GDP dissociation inhibitor alpha OS=Bos taurus GN=GDI1 PE=1 SV=1	7	Carbamidomethyl	5.0	50.5	1	230.6 (M:230.6)	21.9	10.50	318
319		true	sp|A7E3Q8|PLST_BOVIN	Plastin-3 OS=Bos taurus GN=PLS3 PE=2 SV=1	6	Carbamidomethyl, Carbamyl, Phospho	5.4	70.8	3	230.2 (M:230.2)	9.4	24.67	319
320		true	sp|A7MBJ4|PTPRF_BOVIN	Receptor-type tyrosine-protein phosphatase F OS=Bos taurus GN=PTPRF PE=2 SV=1	7	Carbamyl, Oxidation, Phospho, Glu->pyro-Glu	6.1	211.2	1	230.1 (M:230.1)	3.6	563.24	320
321		true	tr|F1N0H4|F1N0H4_BOVIN	Uncharacterized protein (Fragment) OS=Bos taurus GN=RAI14 PE=4 SV=1	8	Carbamyl, Oxidation, Phospho, Glu->pyro-Glu	5.8	109.6	1	229.0 (M:229.0)	4.5	673.74	321
322		true	tr|E1BE11|E1BE11_BOVIN	Uncharacterized protein OS=Bos taurus GN=HMCN1 PE=4 SV=2	8	Carbamidomethyl, Carbamyl, Carboxymethyl, Oxidation, Phospho	6.1	607.0	1	228.9 (M:228.9)	1.9	481.05	322
323		true	tr|E1BKS1|E1BKS1_BOVIN	Syndecan OS=Bos taurus GN=SDC4 PE=3 SV=1	3		4.3	21.6	2	228.7 (M:228.7)	19.1	12.81	323
324		true	sp|Q08D91|K2C75_BOVIN	Keratin, type II cytoskeletal 75 OS=Bos taurus GN=KRT75 PE=2 SV=1	4	Carbamidomethyl, Carbamyl, Oxidation, Phospho	7.6	59.0	1	228.2 (M:228.2)	6.6	610.28	324
325		true	tr|A0A024AGI8|A0A024AGI8_LIV	Genome polyprotein OS=Louping ill virus PE=4 SV=1	6	Carbamidomethyl, Carbamyl, Carboxymethyl, Oxidation, Phospho	8.5	378.5	1	227.7 (M:227.7)	2.1	618.66	325
326		true	sp|A4FV54|RAB8A_BOVIN	Ras-related protein Rab-8A OS=Bos taurus GN=RAB8A PE=2 SV=1	5		9.1	23.7	3	227.6 (M:227.6)	28.0	10.75	326
327		true	tr|E1BLB6|E1BLB6_BOVIN	Uncharacterized protein OS=Bos taurus GN=PRKDC PE=4 SV=2	7	Carbamidomethyl, Carbamyl, Carboxymethyl, Oxidation, Phospho	6.7	464.5	1	226.3 (M:226.3)	2.0	476.18	327
328		true	tr|Q807Z8|Q807Z8_BVDV	Genome polyprotein OS=Bovine viral diarrhea virus PE=4 SV=1	6	Carbamidomethyl, Carbamyl, Carboxymethyl, Oxidation, Phospho	8.8	471.4	2	225.8 (M:225.8)	1.9	371.09	328
329		true	tr|Q808A0|Q808A0_BVDV	Genome polyprotein OS=Bovine viral diarrhea virus PE=4 SV=1	6	Carbamidomethyl, Carbamyl, Carboxymethyl, Oxidation, Phospho	8.7	437.7	1	225.0 (M:225.0)	2.1	41.08	329
330		true	tr|E1BBS9|E1BBS9_BOVIN	Uncharacterized protein OS=Bos taurus GN=CROCC PE=4 SV=2	7	Gln->pyro-Glu, Carbamyl, Oxidation, Phospho	5.6	222.9	1	224.9 (M:224.9)	3.4	616.06	330
331		true	tr|H2CNR1|H2CNR1_BOVIN	Peptidoglycan-recognition protein OS=Bos taurus GN=PGLYRP1 PE=3 SV=1	6	Carbamidomethyl, Gln->pyro-Glu, Carbamyl, Phospho	9.6	21.0	2	224.5 (M:224.5)	36.8	12.36	331
332		true	tr|F1MV51|F1MV51_BOVIN	Uncharacterized protein OS=Bos taurus GN=APC PE=4 SV=2	6	Carbamidomethyl, Carbamyl, Oxidation, Phospho	7.6	312.3	2	224.4 (M:224.4)	3.2	183.06	332
333		true	tr|A0A0F6YFG4|A0A0F6YFG4_BVDV	Genome polyprotein OS=Bovine viral diarrhea virus PE=4 SV=1	4	Carbamidomethyl, Carbamyl, Carboxymethyl, Phospho	8.8	437.6	1	224.2 (M:224.2)	0.8	951.04	333
334		true	tr|Q0VCH9|Q0VCH9_BOVIN	GLI pathogenesis-related 2 OS=Bos taurus GN=GLIPR2 PE=2 SV=1	4	Carbamidomethyl, Carbamyl	9.5	17.2	1	223.6 (M:223.6)	32.5	631.49	334
335		true	sp|A6QNX5|K2C78_BOVIN	Keratin, type II cytoskeletal 78 OS=Bos taurus GN=KRT78 PE=2 SV=1	7	Carbamidomethyl, Carbamyl, Carboxymethyl, Oxidation, Phospho	8.5	57.4	1	223.5 (M:223.5)	10.4	546.43	335
336		true	tr|O92872|O92872_BVDV	Genome polyprotein OS=Bovine viral diarrhea virus PE=4 SV=1	6	Carbamidomethyl, Carbamyl, Oxidation, Phospho	8.8	438.1	1	223.3 (M:223.3)	1.9	37.00	336
337		true	tr|E1BJ15|E1BJ15_BOVIN	Centrosomal protein of 290 kDa OS=Bos taurus GN=CEP290 PE=4 SV=1	5	Carbamyl, Oxidation, Phospho	5.7	290.2	5	222.7 (M:222.7)	1.7	637.98	337
338		true	tr|Q9BGI4|Q9BGI4_BOVIN	Peroxiredoxin 1 OS=Bos taurus PE=2 SV=1	5		8.8	22.2	5	222.3 (M:222.3)	24.1	10.35	338
339		true	sp|Q01499|POLG_BVDVS	Genome polyprotein OS=Bovine viral diarrhea virus (strain SD-1) PE=1 SV=1	5	Carbamidomethyl, Carbamyl, Carboxymethyl, Oxidation, Phospho	8.7	437.5	2	222.1 (M:222.1)	1.7	310.17	339
340		true	tr|F1MD73|F1MD73_BOVIN	Uncharacterized protein (Fragment) OS=Bos taurus GN=DMBT1 PE=4 SV=2	4	Carbamidomethyl, Carbamyl, Oxidation	5.5	190.0	2	221.6 (M:221.6)	3.1	529.83	340
341		true	sp|P0C6F4|R1A_BRV1	Replicase polyprotein 1a OS=Breda virus 1 GN=1a PE=3 SV=1	7	Carbamidomethyl, Gln->pyro-Glu, Carbamyl, Oxidation, Phospho	5.8	505.6	1	221.5 (M:221.5)	1.8	411.90	341
342		true	tr|F1MXF5|F1MXF5_BOVIN	Uncharacterized protein (Fragment) OS=Bos taurus GN=AKAP9 PE=4 SV=2	8	Carbamyl, Oxidation, Phospho, Glu->pyro-Glu	5.1	441.9	1	221.5 (M:221.5)	1.5	289.87	342
343		true	tr|A6QLN6|A6QLN6_BOVIN	MYH11 protein OS=Bos taurus GN=MYH11 PE=2 SV=1	5	Carbamyl, Oxidation, Phospho, Glu->pyro-Glu	5.4	227.5	2	220.3 (M:220.3)	2.2	541.24	343
344		true	tr|F1MK55|F1MK55_BOVIN	Uncharacterized protein OS=Bos taurus GN=DNAH2 PE=4 SV=2	4	Carbamidomethyl, Carbamyl, Carboxymethyl, Oxidation, Phospho	5.9	508.0	1	219.8 (M:219.8)	1.3	12924.16	344
345		true	sp|Q3ZCD0|CD81_BOVIN	CD81 antigen OS=Bos taurus GN=CD81 PE=2 SV=1	3	Carbamidomethyl, Gln->pyro-Glu, Carbamyl, Carboxymethyl, Phospho	5.3	25.8	2	219.7 (M:219.7)	15.3	18184.59	345
346		true	tr|F1MWU9|F1MWU9_BOVIN	Uncharacterized protein OS=Bos taurus GN=HSPA6 PE=3 SV=2	4	Gln->pyro-Glu, Carbamyl, Phospho	5.7	70.9	1	219.1 (M:219.1)	7.8	46.41	346
347		true	tr|G5E5C4|G5E5C4_BOVIN	Protein RRP5 homolog OS=Bos taurus GN=PDCD11 PE=4 SV=1	6	Gln->pyro-Glu, Carbamyl, Oxidation, Phospho	9.1	208.4	2	218.4 (M:218.4)	3.5	377.94	347
348		true	tr|F1N6Q9|F1N6Q9_BOVIN	Uncharacterized protein OS=Bos taurus GN=WDFY3 PE=4 SV=2	4	Carbamidomethyl, Carbamyl, Carboxymethyl, Oxidation, Phospho	6.4	393.4	2	217.2 (M:217.2)	1.2	686.13	348
349		true	tr|G5E5L5|G5E5L5_BOVIN	Melanoma inhibitory activity protein 3 (Fragment) OS=Bos taurus GN=MIA3 PE=4 SV=1	3	Carbamyl, Phospho	4.8	206.6	2	217.1 (M:217.1)	2.4	10.23	349
350		true	tr|F1MKI1|F1MKI1_BOVIN	Uncharacterized protein OS=Bos taurus GN=ATP7B PE=3 SV=2	9	Carbamyl, Oxidation, Phospho	6.2	160.8	1	216.7 (M:216.7)	2.1	316.06	350
351		true	sp|Q3SWW8|TSP4_BOVIN	Thrombospondin-4 OS=Bos taurus GN=THBS4 PE=2 SV=1	6	Carbamidomethyl	4.4	105.9	1	216.2 (M:216.2)	8.5	10.00	351
352		true	tr|A0A0E3H1V8|A0A0E3H1V8_BVDV	Genome polyprotein OS=Bovine viral diarrhea virus PE=4 SV=1	7	Carbamidomethyl, Carbamyl, Carboxymethyl, Oxidation, Phospho	8.8	437.5	4	216.1 (M:216.1)	2.0	541.45	352
353		true	tr|A0A0E3KDE6|A0A0E3KDE6_BVDV	Genome polyprotein OS=Bovine viral diarrhea virus PE=4 SV=1	5	Carbamidomethyl, Carbamyl, Carboxymethyl, Oxidation, Phospho	8.7	437.6	1	215.8 (M:215.8)	1.5	627.25	353
354		true	tr|F1MU34|F1MU34_BOVIN	Uncharacterized protein OS=Bos taurus GN=ERAP1 PE=4 SV=1	7	Carbamyl, Phospho	5.8	107.0	2	215.6 (M:215.6)	7.5	23.68	354
355		true	tr|F1ML32|F1ML32_BOVIN	Uncharacterized protein (Fragment) OS=Bos taurus GN=SCARF1 PE=4 SV=1	6	Carbamidomethyl, Carbamyl, Carboxymethyl, Phospho	5.8	88.5	1	215.0 (M:215.0)	4.5	10216.21	355
356		true	sp|P19711|POLG_BVDVN	Genome polyprotein OS=Bovine viral diarrhea virus (isolate NADL) PE=1 SV=2	5	Carbamidomethyl, Carbamyl, Oxidation, Phospho	8.8	448.9	5	214.8 (M:214.8)	1.7	39.24	356
357		true	tr|G3N1C8|G3N1C8_BOVIN	Uncharacterized protein OS=Bos taurus GN=DNAH1 PE=4 SV=1	6	Carbamidomethyl, Carbamyl, Carboxymethyl, Oxidation, Phospho, Glu->pyro-Glu	5.8	492.7	2	214.8 (M:214.8)	1.4	519.47	357
358		true	tr|E1B8X8|E1B8X8_BOVIN	Uncharacterized protein OS=Bos taurus GN=BRCA2 PE=4 SV=2	7	Carbamidomethyl, Carbamyl, Carboxymethyl, Oxidation, Phospho	6.4	376.1	1	214.3 (M:214.3)	1.4	685.22	358
359		true	tr|F1N415|F1N415_BOVIN	Uncharacterized protein OS=Bos taurus GN=PCLO PE=4 SV=2	6	Gln->pyro-Glu, Carbamyl, Oxidation, Phospho	5.8	546.8	1	214.2 (M:214.2)	1.1	491.10	359
360		true	tr|Q2HJF0|Q2HJF0_BOVIN	Serotransferrin-like OS=Bos taurus GN=LOC525947 PE=2 SV=1	6	Carbamidomethyl, Carbamyl, Carboxymethyl	8.2	69.1	2	214.0 (M:214.0)	11.9	10.25	360
361		true	tr|E1BE29|E1BE29_BOVIN	Uncharacterized protein (Fragment) OS=Bos taurus GN=RYR2 PE=4 SV=2	5	Carbamidomethyl, Carbamyl, Oxidation, Phospho	5.9	563.4	2	214.0 (M:214.0)	1.2	622.93	361
362		true	tr|A0A076FIJ3|A0A076FIJ3_BVDV	Genome polyprotein OS=Bovine viral diarrhea virus PE=4 SV=1	6	Carbamidomethyl, Carbamyl, Carboxymethyl, Oxidation, Phospho	8.7	438.1	1	213.5 (M:213.5)	1.6	354.47	362
363		true	sp|P26201|CD36_BOVIN	Platelet glycoprotein 4 OS=Bos taurus GN=CD36 PE=1 SV=5	4	Carbamidomethyl, Carbamyl	8.4	52.9	1	213.0 (M:213.0)	6.6	500.44	363
364		true	tr|E1BB91|E1BB91_BOVIN	Uncharacterized protein OS=Bos taurus GN=COL6A3 PE=4 SV=1	10	Carbamidomethyl, Carbamyl, Carboxymethyl, Oxidation, Phospho	6.1	342.2	2	212.8 (M:212.8)	3.1	484.69	364
365		true	tr|A7E3S8|A7E3S8_BOVIN	Heat shock 70kD protein binding protein OS=Bos taurus GN=ST13 PE=2 SV=1	5	Carbamyl, Phospho	5.2	41.4	3	212.6 (M:212.6)	15.2	306.52	365
366		true	tr|F1N7I5|F1N7I5_BOVIN	Uncharacterized protein (Fragment) OS=Bos taurus GN=NUMA1 PE=4 SV=2	8	Carbamyl, Oxidation, Phospho, Glu->pyro-Glu	5.5	238.8	1	212.1 (M:212.1)	4.2	656.73	366
367		true	tr|E1BG49|E1BG49_BOVIN	Kinesin-like protein OS=Bos taurus GN=CENPE PE=3 SV=2	7	Carbamidomethyl, Gln->pyro-Glu, Carbamyl, Oxidation, Phospho	5.4	316.9	2	211.7 (M:211.7)	2.1	330.16	367
368		true	tr|D3TJU9|D3TJU9_BOVIN	CSN1S1 (Fragment) OS=Bos taurus GN=CSN1S1 PE=4 SV=1	6	Carbamyl, Phospho, Glu->pyro-Glu	5.0	3.1	2	211.5 (M:211.5)	80.8	11.74	368
369		true	tr|F1N226|F1N226_BOVIN	Uncharacterized protein (Fragment) OS=Bos taurus GN=APLP2 PE=4 SV=2	4	Carbamidomethyl, Carboxymethyl	4.7	83.8	1	211.5 (M:211.5)	4.8	18566.92	369
370		true	tr|Q5DPW9|Q5DPW9_BOVIN	Cystatin E/M OS=Bos taurus GN=CST6 PE=4 SV=1	4	Carbamidomethyl	7.6	16.3	3	211.2 (M:211.2)	35.6	11.73	370
371		true	sp|P28800|A2AP_BOVIN	Alpha-2-antiplasmin OS=Bos taurus GN=SERPINF2 PE=1 SV=2	4	Carbamidomethyl, Carbamyl	5.4	54.7	1	211.1 (M:211.1)	7.5	11.87	371
372		true	tr|F1N4J2|F1N4J2_BOVIN	Uncharacterized protein (Fragment) OS=Bos taurus GN=SACS PE=4 SV=2	5	Carbamyl, Oxidation, Phospho	6.6	518.1	1	211.0 (M:211.0)	1.5	285.62	372
373		true	tr|A5D7E8|A5D7E8_BOVIN	PDIA3 protein OS=Bos taurus GN=PDIA3 PE=2 SV=1	8	Carbamyl, Phospho, Glu->pyro-Glu	6.4	56.9	2	210.3 (M:210.3)	18.2	22.80	373
374		true	tr|A0A060GXP8|A0A060GXP8_BVDV	Genome polyprotein OS=Bovine viral diarrhea virus PE=4 SV=1	4	Carbamidomethyl, Carbamyl, Carboxymethyl, Oxidation, Phospho	8.7	437.2	3	210.2 (M:210.2)	1.4	37.04	374
375		true	tr|F1MQ37|F1MQ37_BOVIN	Uncharacterized protein OS=Bos taurus GN=MYH9 PE=4 SV=2	5	Carbamidomethyl, Gln->pyro-Glu, Carbamyl, Oxidation, Phospho	5.5	227.0	1	210.0 (M:210.0)	3.2	20.65	375
376		true	sp|Q3SYU2|EF2_BOVIN	Elongation factor 2 OS=Bos taurus GN=EEF2 PE=2 SV=3	6	Carbamidomethyl, Carbamyl, Carboxymethyl, Oxidation, Phospho	6.4	95.3	1	209.6 (M:209.6)	6.6	8.82	376
377		true	sp|Q8WML4|MUC1_BOVIN	Mucin-1 OS=Bos taurus GN=MUC1 PE=1 SV=1	4	Carbamyl, Phospho	6.8	58.1	3	209.5 (M:209.5)	9.5	179.22	377
378		true	tr|F1MIH9|F1MIH9_BOVIN	Putative phospholipase B-like 2 OS=Bos taurus GN=PLBD2 PE=4 SV=2	5	Carbamidomethyl, Phospho, Glu->pyro-Glu	8.3	65.7	2	209.0 (M:209.0)	11.5	26.35	378
379		true	tr|E1BKB8|E1BKB8_BOVIN	Cone cGMP-specific 3',5'-cyclic phosphodiesterase subunit alpha' OS=Bos taurus GN=PDE6C PE=4 SV=2	5	Carbamidomethyl, Carbamyl, Oxidation, Phospho	5.4	98.6	2	209.0 (M:209.0)	5.4	30.35	379
380		true	tr|E1BI97|E1BI97_BOVIN	Uncharacterized protein OS=Bos taurus GN=CCDC168 PE=4 SV=2	8	Carbamidomethyl, Carbamyl, Oxidation, Phospho	9.5	265.5	1	209.0 (M:209.0)	4.8	308.43	380
381		true	tr|E1BFB0|E1BFB0_BOVIN	Uncharacterized protein OS=Bos taurus GN=SPTAN1 PE=4 SV=2	6	Carbamidomethyl, Carbamyl, Carboxymethyl, Oxidation, Phospho, Glu->pyro-Glu	5.2	284.4	1	208.7 (M:208.7)	1.7	1095.04	381
382		true	sp|Q9TTS3|ACACA_BOVIN	Acetyl-CoA carboxylase 1 OS=Bos taurus GN=ACACA PE=2 SV=1	5	Carbamidomethyl, Carbamyl, Carboxymethyl, Oxidation, Phospho, Glu->pyro-Glu	6.0	265.1	5	208.0 (M:208.0)	2.0	699.53	382
383		true	sp|A0JN62-2|CE120_BOVIN	Isoform 2 of Centrosomal protein of 120 kDa OS=Bos taurus GN=CEP120	5	Carbamyl, Phospho	6.3	107.1	2	207.2 (M:207.2)	6.1	740.73	383
384		true	tr|F1MYZ3|F1MYZ3_BOVIN	Uncharacterized protein (Fragment) OS=Bos taurus GN=KMT2C PE=4 SV=2	5	Carbamidomethyl, Carbamyl, Oxidation, Phospho	6.1	526.2	1	206.9 (M:206.9)	1.0	349.81	384
385		true	sp|P13696|PEBP1_BOVIN	Phosphatidylethanolamine-binding protein 1 OS=Bos taurus GN=PEBP1 PE=1 SV=2	5		7.0	21.0	2	206.4 (M:206.4)	39.6	10.85	385
386		true	tr|E1BKX7|E1BKX7_BOVIN	Uncharacterized protein OS=Bos taurus GN=FLNB PE=4 SV=2	7	Carbamidomethyl, Carbamyl, Oxidation, Phospho	5.6	281.4	1	205.8 (M:205.8)	2.7	458.31	386
387		true	tr|G3N3D6|G3N3D6_BOVIN	Phosphoinositide phospholipase C (Fragment) OS=Bos taurus GN=PLCH1 PE=4 SV=1	5	Carbamidomethyl, Carbamyl, Phospho, Glu->pyro-Glu	8.1	186.9	2	205.6 (M:205.6)	2.8	63.10	387
388		true	tr|F1N790|F1N790_BOVIN	Uncharacterized protein (Fragment) OS=Bos taurus GN=PRDM2 PE=4 SV=2	7	Carbamidomethyl, Carbamyl, Oxidation, Phospho	8.4	183.2	1	205.5 (M:205.5)	3.3	670.06	388
389		true	sp|Q58D62|FETUB_BOVIN	Fetuin-B OS=Bos taurus GN=FETUB PE=2 SV=1	4	Carbamidomethyl, Carboxymethyl	5.6	42.6	1	205.4 (M:205.4)	17.8	10.45	389
390		true	sp|Q5KR47-2|TPM3_BOVIN	Isoform 2 of Tropomyosin alpha-3 chain OS=Bos taurus GN=TPM3	3	Carbamyl, Oxidation, Phospho	4.7	29.0	2	204.9 (M:204.9)	10.1	10.63	390
391		true	tr|F1MEN8|F1MEN8_BOVIN	Protein disulfide-isomerase A4 OS=Bos taurus GN=PDIA4 PE=3 SV=1	5	Phospho	5.0	72.5	2	204.6 (M:204.6)	9.5	481.22	391
392		true	tr|E1BK38|E1BK38_BOVIN	Uncharacterized protein (Fragment) OS=Bos taurus GN=ABCA13 PE=4 SV=2	7	Carbamidomethyl, Carbamyl, Oxidation, Phospho	6.2	567.6	1	204.3 (M:204.3)	1.4	479.62	392
393		true	tr|E1B882|E1B882_BOVIN	Uncharacterized protein OS=Bos taurus GN=MXRA5 PE=4 SV=1	8	Carbamyl, Oxidation, Phospho	8.8	310.8	2	204.3 (M:204.3)	2.6	219.02	393
394		true	tr|A6QQ11|A6QQ11_BOVIN	PGM2 protein (Fragment) OS=Bos taurus GN=PGM2 PE=1 SV=1	9	Carbamyl, Phospho	6.3	69.5	1	204.3 (M:204.3)	16.4	257.55	394
395		true	sp|P10152|ANG1_BOVIN	Angiogenin-1 OS=Bos taurus GN=ANG1 PE=1 SV=4	5	Carbamidomethyl, Carboxymethyl, Oxidation	9.1	17.0	2	203.8 (M:203.8)	27.7	18074.17	395
396		true	tr|G3MZF2|G3MZF2_BOVIN	Histone-lysine N-methyltransferase OS=Bos taurus GN=KMT2D PE=4 SV=1	7	Carbamidomethyl, Carbamyl, Oxidation, Phospho	5.5	579.0	2	203.5 (M:203.5)	1.1	535.73	396
397		true	tr|F1MC84|F1MC84_BOVIN	Uncharacterized protein (Fragment) OS=Bos taurus GN=FAT3 PE=4 SV=2	5	Carbamidomethyl, Carbamyl, Oxidation, Phospho	4.8	503.0	1	203.0 (M:203.0)	1.4	582.36	397
398		true	tr|Q3ZBG1|Q3ZBG1_BOVIN	RAB14 protein OS=Bos taurus GN=RAB14 PE=2 SV=2	5	Phospho	5.9	23.9	1	202.9 (M:202.9)	23.3	23.07	398
399		true	sp|Q3T145|MDHC_BOVIN	Malate dehydrogenase, cytoplasmic OS=Bos taurus GN=MDH1 PE=2 SV=3	4	Carbamidomethyl, Carbamyl, Carboxymethyl, Oxidation, Phospho	6.2	36.4	1	202.7 (M:202.7)	10.2	492.70	399
400		true	tr|G9HVH3|G9HVH3_BVDV	Genome polyprotein OS=Bovine viral diarrhea virus PE=4 SV=1	5	Carbamidomethyl, Carbamyl, Carboxymethyl, Oxidation, Phospho	8.8	437.7	1	202.4 (M:202.4)	1.9	545.94	400
401		true	tr|A7MBG8|A7MBG8_BOVIN	RUVBL1 protein OS=Bos taurus GN=RUVBL1 PE=2 SV=1	5	Carbamidomethyl, Carboxymethyl, Phospho, Glu->pyro-Glu	6.0	50.1	1	200.5 (M:200.5)	7.5	27675.43	401
402		true	sp|Q2YDG0|GPC5C_BOVIN	G-protein coupled receptor family C group 5 member C OS=Bos taurus GN=GPRC5C PE=2 SV=2	4	Phospho	8.4	48.4	3	199.7 (M:199.7)	11.8	11.11	402
403		true	tr|E1B958|E1B958_BOVIN	Uncharacterized protein OS=Bos taurus GN=ALMS1 PE=4 SV=2	9	Carbamyl, Oxidation, Phospho	6.1	367.0	1	199.5 (M:199.5)	2.3	261.89	403
404		true	sp|Q9TRY0|FKBP4_BOVIN	Peptidyl-prolyl cis-trans isomerase FKBP4 OS=Bos taurus GN=FKBP4 PE=1 SV=4	6	Carbamyl, Oxidation, Phospho	5.3	51.5	2	199.4 (M:199.4)	10.0	293.56	404
405		true	tr|E1BCC0|E1BCC0_BOVIN	Uncharacterized protein (Fragment) OS=Bos taurus GN=FAM186A PE=4 SV=2	5	Carbamidomethyl, Gln->pyro-Glu, Carbamyl, Oxidation, Phospho	9.2	246.9	1	199.2 (M:199.2)	1.7	811.50	405
406		true	tr|A0A0E3H1V7|A0A0E3H1V7_BVDV	Genome polyprotein OS=Bovine viral diarrhea virus PE=4 SV=1	5	Carbamidomethyl, Carbamyl, Carboxymethyl, Oxidation, Phospho	8.7	437.5	1	199.1 (M:199.1)	2.0	10195.13	406
407		true	sp|G3X745|GPC1_BOVIN	Glypican-1 OS=Bos taurus GN=GPC1 PE=2 SV=1	5	Carbamidomethyl, Gln->pyro-Glu, Carbamyl, Oxidation, Phospho	6.3	61.0	1	199.1 (M:199.1)	12.2	8.73	407
408		true	tr|Q3SZN8|Q3SZN8_BOVIN	Ribonuclease/angiogenin inhibitor 1 OS=Bos taurus GN=RNH1 PE=1 SV=1	3	Carbamidomethyl	4.6	48.8	2	199.0 (M:199.0)	7.5	10.60	408
409		true	tr|G3MYM1|G3MYM1_BOVIN	Sodium channel protein OS=Bos taurus GN=SCN10A PE=3 SV=1	4	Carbamidomethyl, Gln->pyro-Glu, Carbamyl, Carboxymethyl, Oxidation, Phospho	6.2	221.0	1	198.8 (M:198.8)	2.3	19461.27	409
410		true	tr|G5E600|G5E600_BOVIN	Uncharacterized protein OS=Bos taurus GN=KIAA1033 PE=4 SV=1	4	Carbamidomethyl, Carbamyl, Carboxymethyl, Oxidation, Phospho	7.0	136.4	1	198.5 (M:198.5)	2.2	22001.85	410
411		true	sp|Q0VCX1|C1S_BOVIN	Complement C1s subcomponent OS=Bos taurus GN=C1S PE=2 SV=2	4	Carbamidomethyl	5.0	76.6	2	198.3 (M:198.3)	7.5	12.77	411
412		true	tr|E1BCQ3|E1BCQ3_BOVIN	Uncharacterized protein OS=Bos taurus GN=CCDC88C PE=4 SV=2	5	Carbamyl, Oxidation, Phospho	5.8	227.8	3	198.3 (M:198.3)	2.4	607.59	412
413		true	tr|E1BE13|E1BE13_BOVIN	Uncharacterized protein OS=Bos taurus GN=BIRC6 PE=4 SV=2	4	Carbamidomethyl, Carbamyl, Carboxymethyl, Oxidation, Phospho	5.7	530.3	1	198.2 (M:198.2)	0.9	894.87	413
414		true	tr|E1BBP4|E1BBP4_BOVIN	Tyrosine-protein kinase receptor OS=Bos taurus GN=DDR1 PE=3 SV=2	8	Carbamidomethyl, Carbamyl, Oxidation, Phospho	6.2	101.1	4	198.0 (M:198.0)	8.9	12.76	414
415		true	sp|P13214|ANXA4_BOVIN	Annexin A4 OS=Bos taurus GN=ANXA4 PE=1 SV=2	4	Carbamidomethyl, Carbamyl, Phospho	5.5	35.9	3	197.5 (M:197.5)	14.7	10.52	415
416		true	sp|Q3T000|YKT6_BOVIN	Synaptobrevin homolog YKT6 OS=Bos taurus GN=YKT6 PE=2 SV=1	3	Carbamyl	6.2	22.5	1	197.3 (M:197.3)	18.2	12.28	416
417		true	tr|G3MZ19|G3MZ19_BOVIN	HRPE773-like OS=Bos taurus GN=LOC100295741 PE=4 SV=1	3		8.5	17.6	1	197.2 (M:197.2)	24.2	10.91	417
418		true	tr|Q3ZBS7|Q3ZBS7_BOVIN	Uncharacterized protein OS=Bos taurus GN=VTN PE=2 SV=1	7	Carbamidomethyl, Carbamyl, Oxidation, Phospho	5.9	53.5	1	197.1 (M:197.1)	16.0	127.07	418
419		true	tr|V6F7Z2|V6F7Z2_BOVIN	Down syndrome cell adhesion molecule like 1 OS=Bos taurus GN=DSCAML1 PE=4 SV=1	4	Carbamyl, Oxidation, Phospho	8.6	230.3	3	196.2 (M:196.2)	1.8	590.30	419
420		true	tr|J9TPF5|J9TPF5_BOVIN	Cardiomyopathy associated protein 5 OS=Bos taurus GN=CMYA5 PE=2 SV=1	6	Carbamyl, Oxidation, Phospho	4.6	440.8	2	196.0 (M:196.0)	1.8	583.32	420
421		true	tr|E1BJL8|E1BJL8_BOVIN	Folate receptor alpha OS=Bos taurus GN=FOLR1 PE=4 SV=1	3	Carbamidomethyl	8.0	29.7	1	195.9 (M:195.9)	12.8	12.01	421
422		true	tr|F1MM57|F1MM57_BOVIN	Uncharacterized protein OS=Bos taurus GN=MYH14 PE=4 SV=2	5	Carbamyl, Oxidation, Phospho, Glu->pyro-Glu	5.6	232.2	1	195.9 (M:195.9)	2.7	382.84	422
423		true	tr|E1BMC0|E1BMC0_BOVIN	Uncharacterized protein (Fragment) OS=Bos taurus GN=POLQ PE=4 SV=2	4	Carbamidomethyl, Carbamyl, Carboxymethyl, Oxidation, Phospho, Glu->pyro-Glu	8.2	305.2	1	195.1 (M:195.1)	1.5	17975.49	423
424		true	sp|Q148H6|K1C28_BOVIN	Keratin, type I cytoskeletal 28 OS=Bos taurus GN=KRT28 PE=2 SV=1	7	Carbamyl, Oxidation, Phospho	5.2	50.7	1	195.1 (M:195.1)	11.2	436.70	424
425		true	tr|Q3YJJ9|Q3YJJ9_BOVIN	MHC class I antigen (Fragment) OS=Bos taurus GN=BoLA PE=3 SV=1	4		5.8	40.4	99	194.3 (M:194.3)	14.0	9.86	425
426		true	tr|E1BPC2|E1BPC2_BOVIN	Uncharacterized protein OS=Bos taurus GN=PDZD8 PE=4 SV=1	5	Carbamyl, Phospho	5.7	128.4	1	193.9 (M:193.9)	2.7	335.94	426
427		true	tr|F1MPT3|F1MPT3_BOVIN	14-3-3 protein eta OS=Bos taurus GN=YWHAH PE=3 SV=2	5	Carbamyl, Oxidation	4.8	25.2	2	193.6 (M:193.6)	17.3	523.48	427
428		true	tr|E1BPV9|E1BPV9_BOVIN	Uncharacterized protein OS=Bos taurus GN=ZFHX3 PE=4 SV=2	5	Carbamyl, Phospho	5.8	402.4	1	193.3 (M:193.3)	1.3	482.05	428
429		true	tr|A0A0E3JSS9|A0A0E3JSS9_SBV	RNA-dependent RNA polymerase OS=Schmallenberg virus GN=RdRp PE=4 SV=1	4	Carbamidomethyl, Carbamyl, Oxidation, Phospho	6.6	260.8	16	193.1 (M:193.1)	2.6	266.99	429
430		true	sp|Q24K02|IDE_BOVIN	Insulin-degrading enzyme OS=Bos taurus GN=IDE PE=2 SV=1	4	Carbamyl, Oxidation, Phospho	6.2	118.0	1	192.8 (M:192.8)	5.0	564.32	430
431		true	tr|F1N7T2|F1N7T2_BOVIN	Alpha-mannosidase OS=Bos taurus GN=MAN2A1 PE=3 SV=2	5	Carbamidomethyl, Carbamyl, Phospho	7.4	130.5	1	192.8 (M:192.8)	4.9	8.91	431
432		true	tr|F1N724|F1N724_BOVIN	Uncharacterized protein OS=Bos taurus GN=DNAH11 PE=4 SV=2	8	Carbamidomethyl, Carbamyl, Carboxymethyl, Oxidation, Phospho	5.8	520.5	3	192.8 (M:192.8)	1.7	743.28	432
433		true	tr|G3MZG5|G3MZG5_BOVIN	Kinesin-like protein OS=Bos taurus GN=CENPE PE=3 SV=1	4	Carbamidomethyl, Gln->pyro-Glu, Carbamyl, Carboxymethyl, Oxidation, Phospho, Glu->pyro-Glu	5.8	315.0	1	192.3 (M:192.3)	1.6	567.80	433
434		true	tr|F1MRU4|F1MRU4_BOVIN	Uncharacterized protein OS=Bos taurus GN=DNAH3 PE=4 SV=2	8	Carbamidomethyl, Carbamyl, Carboxymethyl, Oxidation, Phospho	5.6	467.3	1	192.2 (M:192.2)	2.7	452.85	434
435		true	tr|B7TCH8|B7TCH8_BOVIN	Ubiquitin carboxyl-terminal hydrolase (Fragment) OS=Bos taurus GN=USP9Y PE=3 SV=1	6	Carbamidomethyl, Carbamyl, Carboxymethyl, Oxidation, Phospho	5.5	287.6	2	192.1 (M:192.1)	2.2	431.54	435
436		true	tr|Q2KIF2|Q2KIF2_BOVIN	Leucine-rich alpha-2-glycoprotein 1 OS=Bos taurus GN=LRG1 PE=2 SV=1	6	Carbamidomethyl, Carbamyl, Carboxymethyl, Phospho	6.5	38.3	1	192.1 (M:192.1)	19.1	11.70	436
437		true	tr|E1BF47|E1BF47_BOVIN	Uncharacterized protein OS=Bos taurus GN=TPR PE=4 SV=1	6	Carbamyl, Oxidation, Phospho	5.0	267.1	1	192.0 (M:192.0)	2.6	407.27	437
438		true	tr|A4IFP2|A4IFP2_BOVIN	KRT4 protein OS=Bos taurus GN=KRT4 PE=2 SV=1	3	Carbamidomethyl, Oxidation, Phospho	7.5	58.0	1	192.0 (M:192.0)	4.9	11.04	438
439		true	sp|Q3SZK8|NHRF1_BOVIN	Na(+)/H(+) exchange regulatory cofactor NHE-RF1 OS=Bos taurus GN=SLC9A3R1 PE=2 SV=1	3	Carbamyl	5.3	39.6	1	191.3 (M:191.3)	10.3	559.62	439
440		true	tr|Q3YJK3|Q3YJK3_BOVIN	MHC class I antigen (Fragment) OS=Bos taurus GN=BoLA PE=3 SV=1	2	Carbamidomethyl, Carbamyl	6.0	40.3	98	191.2 (M:191.2)	6.4	10.70	440
441		true	tr|F1MUW3|F1MUW3_BOVIN	Uncharacterized protein (Fragment) OS=Bos taurus GN=FGD5 PE=4 SV=1	6	Carbamidomethyl, Carbamyl, Carboxymethyl, Oxidation, Phospho	4.9	162.5	2	190.9 (M:190.9)	3.8	860.81	441
442		true	tr|E1BIF6|E1BIF6_BOVIN	Uncharacterized protein OS=Bos taurus GN=VPS13D PE=4 SV=2	7	Carbamyl, Oxidation, Phospho	6.4	484.4	1	190.9 (M:190.9)	2.4	283.92	442
443		true	tr|F1N099|F1N099_BOVIN	Uncharacterized protein OS=Bos taurus GN=UHRF1BP1L PE=4 SV=2	9	Carbamidomethyl, Carbamyl, Carboxymethyl, Oxidation, Phospho	6.0	167.0	1	190.3 (M:190.3)	3.8	24661.28	443
444		true	tr|F1MFY6|F1MFY6_BOVIN	Collectin-43 OS=Bos taurus GN=CL43 PE=4 SV=2	5	Carbamidomethyl, Carbamyl	5.3	24.9	1	190.1 (M:190.1)	26.1	21.53	444
445		true	tr|F1MXV4|F1MXV4_BOVIN	Uncharacterized protein OS=Bos taurus GN=SIPA1L1 PE=4 SV=2	6	Carbamidomethyl, Carbamyl, Phospho	8.5	200.2	1	189.9 (M:189.9)	3.0	565.41	445
446		true	tr|F1MJQ1|F1MJQ1_BOVIN	Ras-related protein Rab-7a OS=Bos taurus GN=RAB7A PE=3 SV=1	3		6.4	23.5	2	189.9 (M:189.9)	21.3	9.53	446
447		true	tr|F1MPP2|F1MPP2_BOVIN	Uncharacterized protein OS=Bos taurus GN=IGFBP7 PE=4 SV=2	5	Carbamidomethyl, Carbamyl	8.3	29.0	2	189.2 (M:189.2)	25.9	441.04	447
448		true	sp|Q0VCU1|ACOC_BOVIN	Cytoplasmic aconitate hydratase OS=Bos taurus GN=ACO1 PE=2 SV=1	6	Phospho	8.1	98.1	2	188.8 (M:188.8)	7.2	10.73	448
449		true	tr|F1MI03|F1MI03_BOVIN	Uncharacterized protein OS=Bos taurus GN=SRRM2 PE=4 SV=1	7	Carbamyl, Oxidation, Phospho	12.1	295.7	2	188.7 (M:188.7)	2.9	561.69	449
450		true	tr|E1BNC9|E1BNC9_BOVIN	Uncharacterized protein (Fragment) OS=Bos taurus GN=ANK3 PE=4 SV=2	7	Carbamidomethyl, Carbamyl, Carboxymethyl, Oxidation, Phospho	5.9	366.7	1	188.7 (M:188.7)	2.9	340.13	450
451		true	sp|F1MJR8|TEX14_BOVIN	Inactive serine/threonine-protein kinase TEX14 OS=Bos taurus GN=TEX14 PE=3 SV=2	2	Carbamidomethyl, Carbamyl, Carboxymethyl, Oxidation, Phospho	5.3	165.2	1	188.6 (M:188.6)	1.0	26242.83	451
452		true	tr|G3MZA2|G3MZA2_BOVIN	Uncharacterized protein (Fragment) OS=Bos taurus GN=MXRA5 PE=4 SV=1	7	Carbamyl, Oxidation, Phospho	7.5	281.4	1	188.5 (M:188.5)	3.1	320.50	452
453		true	tr|F1MJJ8|F1MJJ8_BOVIN	Radixin (Fragment) OS=Bos taurus GN=RDX PE=4 SV=1	5	Gln->pyro-Glu, Carbamyl, Oxidation, Glu->pyro-Glu	5.9	68.5	3	188.5 (M:188.5)	8.1	507.80	453
454		true	tr|G3N2D1|G3N2D1_BOVIN	Uncharacterized protein OS=Bos taurus GN=ASXL3 PE=4 SV=1	5	Carbamyl, Oxidation, Phospho	6.0	252.3	1	188.3 (M:188.3)	2.4	197.75	454
455		true	tr|Q9TRE3|Q9TRE3_BOVIN	Pituitary adenylate cyclase-activating polypeptide receptor (Fragment) OS=Bos taurus PE=1 SV=1	4	Carbamyl, Oxidation, Phospho	5.5	3.4	1	187.5 (M:187.5)	31.0	434.08	455
456		true	tr|E1BPV1|E1BPV1_BOVIN	Uncharacterized protein OS=Bos taurus GN=ARVCF PE=4 SV=2	6	Carbamidomethyl, Carbamyl, Carboxymethyl, Oxidation, Phospho, Glu->pyro-Glu	6.2	103.8	2	186.8 (M:186.8)	5.8	439.06	456
457		true	tr|E1BNZ2|E1BNZ2_BOVIN	Uncharacterized protein OS=Bos taurus GN=SRRM3 PE=4 SV=2	6	Carbamyl, Phospho, Glu->pyro-Glu	11.4	71.5	1	186.4 (M:186.4)	4.9	709.03	457
458		true	tr|F1MHN4|F1MHN4_BOVIN	Uncharacterized protein OS=Bos taurus GN=RICTOR PE=4 SV=2	6	Carbamidomethyl, Carbamyl, Carboxymethyl, Phospho	7.1	191.9	1	186.1 (M:186.1)	2.6	705.65	458
459		true	tr|E1BHT5|E1BHT5_BOVIN	Uncharacterized protein OS=Bos taurus GN=UBR4 PE=4 SV=1	6	Carbamidomethyl, Gln->pyro-Glu, Carbamyl, Carboxymethyl, Phospho, Glu->pyro-Glu	5.7	572.2	2	186.1 (M:186.1)	1.2	579.08	459
460		true	sp|Q32LM7|CC152_BOVIN	Coiled-coil domain-containing protein 152 OS=Bos taurus GN=CCDC152 PE=2 SV=2	4	Carbamyl, Oxidation, Phospho	9.6	28.4	2	185.6 (M:185.6)	16.2	767.74	460
461		true	tr|E1BKB7|E1BKB7_BOVIN	Uncharacterized protein OS=Bos taurus GN=MGA PE=4 SV=2	5	Carbamidomethyl, Gln->pyro-Glu, Carbamyl, Carboxymethyl, Oxidation, Phospho	6.4	314.7	1	185.6 (M:185.6)	2.1	35083.53	461
462		true	sp|O77834|PRDX6_BOVIN	Peroxiredoxin-6 OS=Bos taurus GN=PRDX6 PE=1 SV=3	4	Carbamidomethyl	6.0	25.1	1	184.9 (M:184.9)	19.6	12.61	462
463		true	tr|E1BI79|E1BI79_BOVIN	Uncharacterized protein OS=Bos taurus GN=APC2 PE=4 SV=2	5	Carbamidomethyl, Carbamyl, Carboxymethyl, Oxidation, Phospho	8.8	239.2	1	184.0 (M:184.0)	2.0	25607.48	463
464		true	tr|E1BJV1|E1BJV1_BOVIN	Uncharacterized protein (Fragment) OS=Bos taurus GN=SPTBN5 PE=4 SV=2	4	Carbamidomethyl, Carbamyl, Oxidation, Phospho	6.1	414.6	2	184.0 (M:184.0)	1.0	790.77	464
465		true	tr|E1BKK9|E1BKK9_BOVIN	Uncharacterized protein OS=Bos taurus GN=SELM PE=1 SV=2	3	Carbamidomethyl	5.7	16.2	1	183.8 (M:183.8)	22.8	11.16	465
466		true	tr|E1BMC6|E1BMC6_BOVIN	Uncharacterized protein (Fragment) OS=Bos taurus GN=SLMAP PE=4 SV=2	3	Carbamyl	5.1	89.5	2	183.5 (M:183.5)	4.0	497.93	466
467		true	tr|Q9TTR6|Q9TTR6_BOVIN	Putative sodium-glucose cotransporter (Fragment) OS=Bos taurus GN=sglt1 PE=2 SV=1	3	Carbamidomethyl, Phospho	5.3	34.8	3	183.1 (M:183.1)	9.3	11.84	467
468		true	tr|F1MDC1|F1MDC1_BOVIN	Uncharacterized protein OS=Bos taurus GN=RRBP1 PE=4 SV=2	6	Carbamyl, Oxidation, Phospho	9.4	166.8	2	182.8 (M:182.8)	3.8	614.66	468
469		true	tr|F1N2Q8|F1N2Q8_BOVIN	Uncharacterized protein (Fragment) OS=Bos taurus GN=SZT2 PE=4 SV=2	7	Carbamidomethyl, Gln->pyro-Glu, Carbamyl, Carboxymethyl, Oxidation, Phospho	5.8	377.3	2	182.8 (M:182.8)	1.6	15409.65	469
470		true	tr|F1MBV6|F1MBV6_BOVIN	Uncharacterized protein OS=Bos taurus GN=TPD52 PE=4 SV=1	3		5.1	19.9	4	182.3 (M:182.3)	22.3	10.77	470
471		true	tr|F1MJ66|F1MJ66_BOVIN	Uncharacterized protein (Fragment) OS=Bos taurus GN=KRT12 PE=3 SV=2	4	Oxidation	4.6	50.1	1	181.9 (M:181.9)	5.8	423.27	471
472		true	tr|F1N0A6|F1N0A6_BOVIN	Uncharacterized protein (Fragment) OS=Bos taurus GN=GPR98 PE=4 SV=2	5	Carbamidomethyl, Carbamyl, Oxidation, Phospho	4.5	598.6	1	181.4 (M:181.4)	0.7	659.55	472
473		true	tr|F1MQ21|F1MQ21_BOVIN	Uncharacterized protein (Fragment) OS=Bos taurus GN=NES PE=4 SV=2	8	Carbamyl, Oxidation, Phospho, Glu->pyro-Glu	4.2	168.0	3	181.4 (M:181.4)	7.4	245.13	473
474		true	tr|E1BNR0|E1BNR0_BOVIN	Uncharacterized protein OS=Bos taurus GN=APOB PE=4 SV=2	6	Carbamidomethyl, Carbamyl, Carboxymethyl, Phospho	6.3	515.4	1	181.4 (M:181.4)	1.5	559.96	474
475		true	tr|E1B8B5|E1B8B5_BOVIN	Uncharacterized protein OS=Bos taurus GN=HMSD PE=3 SV=2	4	Carbamyl, Phospho	6.2	23.7	1	181.3 (M:181.3)	20.5	12.71	475
476		true	tr|G3MXF1|G3MXF1_BOVIN	Uncharacterized protein OS=Bos taurus GN=GPRIN2 PE=4 SV=1	6	Carbamyl, Oxidation, Phospho	6.1	47.0	1	181.1 (M:181.1)	4.2	259.21	476
477		true	tr|F1MNN7|F1MNN7_BOVIN	Lipopolysaccharide-binding protein OS=Bos taurus GN=LBP PE=4 SV=1	4		6.6	53.7	2	180.6 (M:180.6)	8.9	12.32	477
478		true	tr|F1MPW4|F1MPW4_BOVIN	Uncharacterized protein OS=Bos taurus GN=SMC5 PE=4 SV=2	6	Carbamidomethyl, Gln->pyro-Glu, Carbamyl, Carboxymethyl, Oxidation, Phospho, Glu->pyro-Glu	8.6	128.9	2	180.6 (M:180.6)	5.9	463.69	478
479		true	sp|Q0VBZ9|MRP_BOVIN	MARCKS-related protein OS=Bos taurus GN=MARCKSL1 PE=2 SV=1	2	Carbamidomethyl	4.7	19.8	3	180.4 (M:180.4)	23.7	9.04	479
480		true	tr|F1N2G1|F1N2G1_BOVIN	Uncharacterized protein OS=Bos taurus GN=BOD1L PE=4 SV=2	4	Carbamidomethyl, Carbamyl, Oxidation, Phospho	5.1	318.8	1	180.1 (M:180.1)	1.7	399.17	480
481		true	tr|E1BNB7|E1BNB7_BOVIN	Uncharacterized protein (Fragment) OS=Bos taurus GN=ARHGAP26 PE=4 SV=2	3	Carbamidomethyl, Carbamyl, Oxidation, Phospho	6.1	86.8	1	179.9 (M:179.9)	3.8	861.71	481
482		true	tr|E1BL03|E1BL03_BOVIN	Uncharacterized protein OS=Bos taurus GN=KIAA1024 PE=4 SV=1	3	Carbamidomethyl, Carbamyl, Carboxymethyl, Oxidation, Phospho	7.5	102.5	1	179.6 (M:179.6)	2.0	25666.75	482
483		true	tr|E1BFJ4|E1BFJ4_BOVIN	Uncharacterized protein OS=Bos taurus GN=RNF17 PE=4 SV=1	4	Carbamyl, Oxidation, Phospho	5.4	188.0	1	179.0 (M:179.0)	2.5	478.50	483
484		true	tr|E1BAS6|E1BAS6_BOVIN	Uncharacterized protein OS=Bos taurus GN=SETX PE=4 SV=2	7	Carbamidomethyl, Carbamyl, Phospho, Glu->pyro-Glu	7.8	301.0	1	179.0 (M:179.0)	3.4	288.26	484
485		true	tr|F1MGF2|F1MGF2_BOVIN	Uncharacterized protein OS=Bos taurus GN=CHD1 PE=4 SV=2	7	Carbamyl, Oxidation, Phospho	6.8	209.0	4	179.0 (M:179.0)	2.5	612.75	485
486		true	sp|P52193|CALR_BOVIN	Calreticulin OS=Bos taurus GN=CALR PE=1 SV=2	4	Carbamidomethyl	4.3	48.0	2	178.9 (M:178.9)	13.4	11.38	486
487		true	tr|G3MZ88|G3MZ88_BOVIN	Uncharacterized protein OS=Bos taurus GN=DNAJB9 PE=1 SV=1	4	Carbamidomethyl	7.8	25.7	1	178.7 (M:178.7)	17.0	439.54	487
488		true	sp|O91940|L_BRSVA	RNA-directed RNA polymerase L OS=Bovine respiratory syncytial virus (strain A51908) GN=L PE=3 SV=1	3	Carbamyl, Phospho	8.8	249.3	1	178.5 (M:178.5)	1.3	371.54	488
489		true	tr|Q9XS94|Q9XS94_BOVIN	Major fibrous sheath protein OS=Bos taurus PE=2 SV=1	6	Carbamidomethyl, Gln->pyro-Glu, Carbamyl, Carboxymethyl, Oxidation, Phospho	6.2	93.9	2	178.4 (M:178.4)	8.3	18611.63	489
490		true	sp|O18964|SYNJ1_BOVIN	Synaptojanin-1 (Fragment) OS=Bos taurus GN=SYNJ1 PE=1 SV=2	5	Carbamidomethyl, Carbamyl, Oxidation, Phospho	7.4	146.5	4	178.2 (M:178.2)	4.6	522.11	490
491		true	tr|E1BG88|E1BG88_BOVIN	Uncharacterized protein OS=Bos taurus GN=PRR14L PE=4 SV=1	6	Carbamyl, Phospho	5.8	228.4	1	177.7 (M:177.7)	3.6	173.84	491
492		true	tr|B9TUC9|B9TUC9_BOVIN	Cathelicidin 7 OS=Bos taurus PE=4 SV=1	2	Carbamyl	9.0	18.8	3	177.7 (M:177.7)	9.7	12.68	492
493		true	sp|Q96662|POLG_BVDVC	Genome polyprotein OS=Bovine viral diarrhea virus (strain CP7) PE=1 SV=1	5	Carbamidomethyl, Carbamyl, Carboxymethyl, Oxidation, Phospho	8.8	438.8	1	177.6 (M:177.6)	1.6	353.58	493
494		true	tr|F1MMX2|F1MMX2_BOVIN	Uncharacterized protein OS=Bos taurus GN=NRAP PE=4 SV=1	6	Carbamidomethyl, Carbamyl, Carboxymethyl, Oxidation, Phospho	9.3	196.8	2	177.4 (M:177.4)	4.6	332.52	494
495		true	tr|E1BET5|E1BET5_BOVIN	Uncharacterized protein OS=Bos taurus GN=SSFA2 PE=4 SV=2	5	Carbamidomethyl, Carbamyl, Carboxymethyl, Phospho	5.0	137.8	1	177.3 (M:177.3)	4.2	17943.92	495
496		true	tr|F1N619|F1N619_BOVIN	Cadherin-1 (Fragment) OS=Bos taurus GN=CDH1 PE=4 SV=2	4	Carbamidomethyl	4.6	91.8	3	176.9 (M:176.9)	6.3	10.02	496
497		true	tr|G3N1I8|G3N1I8_BOVIN	Uncharacterized protein (Fragment) OS=Bos taurus PE=3 SV=1	3	Carbamidomethyl, Oxidation, Phospho	7.2	13.8	1	176.4 (M:176.4)	39.0	417.77	497
498		true	tr|F1MZ13|F1MZ13_BOVIN	Uncharacterized protein (Fragment) OS=Bos taurus GN=OTUD7A PE=4 SV=1	5	Carbamyl, Oxidation, Phospho	8.9	96.3	1	175.9 (M:175.9)	6.1	386.81	498
499		true	tr|F1N2X7|F1N2X7_BOVIN	Uncharacterized protein (Fragment) OS=Bos taurus GN=MLLT4 PE=4 SV=2	6	Carbamidomethyl, Gln->pyro-Glu, Carbamyl, Carboxymethyl, Oxidation, Phospho	5.9	197.9	1	175.8 (M:175.8)	3.7	804.83	499
500		true	sp|P19661|CTHL3_BOVIN	Cathelicidin-3 OS=Bos taurus GN=CATHL3 PE=1 SV=2	5	Carbamidomethyl, Carbamyl, Phospho	10.9	21.6	2	175.6 (M:175.6)	23.7	356.57	500
501		true	tr|F1MGK9|F1MGK9_BOVIN	Uncharacterized protein OS=Bos taurus GN=KIAA0368 PE=4 SV=2	5	Carbamidomethyl, Carbamyl, Oxidation, Phospho	7.1	203.8	1	175.1 (M:175.1)	3.4	422.20	501
502		true	sp|P21214|TGFB2_BOVIN	Transforming growth factor beta-2 OS=Bos taurus GN=TGFB2 PE=1 SV=3	4	Carbamyl, Oxidation, Phospho	8.8	47.7	1	174.7 (M:174.7)	8.9	300.04	502
503		true	tr|E1BMN9|E1BMN9_BOVIN	Uncharacterized protein OS=Bos taurus GN=BSN PE=4 SV=2	6	Carbamyl, Oxidation, Phospho	8.9	382.2	1	174.6 (M:174.6)	1.6	624.66	503
504		true	sp|P81282|CSPG2_BOVIN	Versican core protein OS=Bos taurus GN=VCAN PE=1 SV=2	7	Carbamyl, Oxidation, Phospho, Glu->pyro-Glu	4.5	369.8	8	174.0 (M:174.0)	2.7	672.29	504
505		true	sp|P00727-2|AMPL_BOVIN	Isoform 2 of Cytosol aminopeptidase OS=Bos taurus GN=LAP3	5	Carbamidomethyl, Carbamyl, Phospho	5.7	54.0	3	174.0 (M:174.0)	13.3	10.57	505
506		true	tr|G3X807|G3X807_BOVIN	Histone H4 (Fragment) OS=Bos taurus PE=3 SV=1	3		11.4	10.9	10	173.4 (M:173.4)	30.6	11.02	506
507		true	sp|Q29S21|K2C7_BOVIN	Keratin, type II cytoskeletal 7 OS=Bos taurus GN=KRT7 PE=2 SV=1	4		5.8	51.5	1	173.3 (M:173.3)	8.6	11.67	507
508		true	tr|E1BEI6|E1BEI6_BOVIN	Uncharacterized protein OS=Bos taurus GN=ATM PE=4 SV=1	5	Carbamidomethyl, Carbamyl, Carboxymethyl, Oxidation, Phospho	6.4	350.3	1	173.2 (M:173.2)	1.9	23049.28	508
509		true	sp|Q2KIX7|HP251_BOVIN	Protein HP-25 homolog 1 OS=Bos taurus PE=1 SV=1	2	Carbamyl	7.0	22.5	1	173.2 (M:173.2)	16.5	440.42	509
510		true	tr|G3MZD8|G3MZD8_BOVIN	Uncharacterized protein (Fragment) OS=Bos taurus GN=TXNDC5 PE=4 SV=1	3	Carbamidomethyl, Carbamyl, Phospho	9.1	47.2	1	173.1 (M:173.1)	7.1	753.57	510
511		true	tr|F1MS08|F1MS08_BOVIN	Uncharacterized protein OS=Bos taurus GN=SLC12A2 PE=4 SV=2	3	Carbamidomethyl, Carbamyl, Carboxymethyl, Oxidation, Phospho, Glu->pyro-Glu	6.2	130.3	3	172.9 (M:172.9)	3.2	732.37	511
512		true	sp|Q0VC36|1433S_BOVIN	14-3-3 protein sigma OS=Bos taurus GN=SFN PE=2 SV=1	5	Carbamidomethyl, Oxidation	4.7	27.8	1	172.5 (M:172.5)	15.3	9.64	512
513		true	sp|Q9BE41|MYH2_BOVIN	Myosin-2 OS=Bos taurus GN=MYH2 PE=2 SV=1	4	Carbamidomethyl, Carbamyl, Carboxymethyl, Phospho, Glu->pyro-Glu	5.6	223.2	4	172.4 (M:172.4)	2.6	768.56	513
514		true	tr|E1BM01|E1BM01_BOVIN	Uncharacterized protein OS=Bos taurus GN=RASGRF1 PE=4 SV=2	6	Carbamyl, Oxidation, Phospho	6.9	143.0	1	171.9 (M:171.9)	4.8	325.37	514
515		true	sp|Q07130|UGPA_BOVIN	UTP--glucose-1-phosphate uridylyltransferase OS=Bos taurus GN=UGP2 PE=1 SV=2	5		7.7	56.9	1	171.5 (M:171.5)	14.2	10.47	515
516		true	tr|F1MCM3|F1MCM3_BOVIN	Uncharacterized protein (Fragment) OS=Bos taurus GN=UHRF1BP1 PE=4 SV=1	5	Carbamidomethyl, Carbamyl, Carboxymethyl, Oxidation, Phospho	5.8	158.1	1	171.5 (M:171.5)	3.1	463.11	516
517		true	tr|F1MKT7|F1MKT7_BOVIN	Uncharacterized protein (Fragment) OS=Bos taurus GN=DIP2C PE=4 SV=1	3	Carbamidomethyl, Carbamyl, Carboxymethyl, Phospho	7.7	167.4	1	171.1 (M:171.1)	1.6	23492.33	517
518		true	tr|A2T059|A2T059_RVFV	Glycoprotein OS=Rift valley fever virus PE=4 SV=1	3	Carbamidomethyl, Carbamyl, Carboxymethyl, Oxidation, Phospho, Glu->pyro-Glu	7.6	130.6	139	170.8 (M:170.8)	1.4	1079.63	518
519		true	tr|O11994|O11994_BVDV	Genome polyprotein OS=Bovine viral diarrhea virus PE=4 SV=1	5	Carbamidomethyl, Carbamyl, Carboxymethyl, Oxidation, Phospho	9.1	438.3	1	170.8 (M:170.8)	1.7	41.92	519
520		true	tr|E3W9A2|E3W9A2_BOVIN	Uncharacterized protein OS=Bos taurus GN=CLIP1 PE=4 SV=2	6	Carbamyl, Oxidation, Phospho	5.2	160.5	2	170.8 (M:170.8)	3.3	29.92	520
521		true	sp|Q3SYW6|EIF3C_BOVIN	Eukaryotic translation initiation factor 3 subunit C OS=Bos taurus GN=EIF3C PE=2 SV=1	6	Gln->pyro-Glu, Carbamyl, Phospho, Glu->pyro-Glu	5.6	105.3	1	170.7 (M:170.7)	6.6	464.16	521
522		true	sp|Q3B7M5|LASP1_BOVIN	LIM and SH3 domain protein 1 OS=Bos taurus GN=LASP1 PE=2 SV=1	5	Carbamidomethyl, Oxidation, Phospho, Glu->pyro-Glu	6.6	29.7	1	170.5 (M:170.5)	23.8	407.67	522
523		true	tr|F1MPW0|F1MPW0_BOVIN	Uncharacterized protein OS=Bos taurus GN=AMBRA1 PE=4 SV=2	6	Carbamyl, Phospho	6.7	141.8	2	170.4 (M:170.4)	3.5	206.63	523
524		true	tr|G5E5M1|G5E5M1_BOVIN	Uncharacterized protein OS=Bos taurus GN=PHF3 PE=4 SV=1	7	Carbamyl, Oxidation, Phospho	7.1	226.7	2	169.7 (M:169.7)	2.2	660.35	524
525		true	tr|Q0VCZ8|Q0VCZ8_BOVIN	Acyl-CoA synthetase long-chain family member 1 OS=Bos taurus GN=ACSL1 PE=2 SV=1	5	Carbamidomethyl, Carbamyl, Carboxymethyl, Oxidation, Phospho, Glu->pyro-Glu	6.9	78.2	1	169.6 (M:169.6)	7.2	501.06	525
526		true	tr|E1BNJ5|E1BNJ5_BOVIN	Uncharacterized protein OS=Bos taurus GN=BAZ2B PE=4 SV=2	4	Carbamidomethyl, Gln->pyro-Glu, Carbamyl, Carboxymethyl, Phospho	6.2	240.3	4	169.4 (M:169.4)	3.0	9981.46	526
527		true	tr|F1MSK3|F1MSK3_BOVIN	Proto-oncogene vav (Fragment) OS=Bos taurus GN=VAV1 PE=4 SV=2	3	Carbamidomethyl, Carbamyl, Carboxymethyl, Oxidation, Phospho	7.0	90.6	3	169.1 (M:169.1)	4.0	72.00	527
528		true	tr|F1MX21|F1MX21_BOVIN	Inositol 1,4,5-trisphosphate receptor type 1 (Fragment) OS=Bos taurus GN=ITPR1 PE=4 SV=2	7	Carbamyl, Oxidation, Phospho	5.9	302.7	2	169.0 (M:169.0)	2.9	633.95	528
529		true	tr|F1MLE1|F1MLE1_BOVIN	Uncharacterized protein OS=Bos taurus GN=DIP2B PE=4 SV=2	6	Carbamidomethyl, Carbamyl, Carboxymethyl, Oxidation, Phospho, Glu->pyro-Glu	8.4	171.4	1	168.9 (M:168.9)	2.5	15058.88	529
530		true	tr|A2T071|A2T071_RVFV	Glycoprotein OS=Rift valley fever virus PE=4 SV=1	4	Carbamidomethyl, Carbamyl, Carboxymethyl, Oxidation, Phospho, Glu->pyro-Glu	7.5	130.8	1	168.6 (M:168.6)	1.9	775.43	530
531		true	tr|F1MC03|F1MC03_BOVIN	Uncharacterized protein OS=Bos taurus GN=CEP295 PE=4 SV=2	4	Gln->pyro-Glu, Carbamyl, Phospho	5.7	276.6	3	168.6 (M:168.6)	1.1	731.06	531
532		true	tr|G5E5S5|G5E5S5_BOVIN	Uncharacterized protein OS=Bos taurus GN=NAV1 PE=4 SV=1	5	Carbamyl, Oxidation, Phospho, Glu->pyro-Glu	8.9	200.8	2	168.5 (M:168.5)	1.5	960.15	532
533		true	tr|E1BC41|E1BC41_BOVIN	Kinesin-like protein OS=Bos taurus GN=KIF15 PE=3 SV=2	6	Carbamyl, Oxidation, Phospho, Glu->pyro-Glu	5.7	160.2	1	168.4 (M:168.4)	3.6	437.39	533
534		true	tr|M0QVY7|M0QVY7_BOVIN	Sodium channel protein OS=Bos taurus GN=SCN9A PE=3 SV=1	4	Carbamyl, Oxidation, Phospho	6.3	225.7	1	168.4 (M:168.4)	1.7	378.47	534
535		true	tr|Q687I9|Q687I9_BOVIN	Purine nucleoside phosphorylase OS=Bos taurus GN=EDIP PE=2 SV=1	4	Carbamyl, Oxidation, Phospho	5.8	32.0	3	168.1 (M:168.1)	11.8	429.17	535
536		true	tr|Q9TRC0|Q9TRC0_BOVIN	Enterotoxin-binding glycoprotein PP16K (Fragment) OS=Bos taurus PE=1 SV=1	5	Carbamidomethyl, Carbamyl, Glu->pyro-Glu	6.4	2.3	1	168.1 (M:168.1)	65.0	26.06	536
537		true	tr|E1B9M5|E1B9M5_BOVIN	Uncharacterized protein OS=Bos taurus GN=BAI2 PE=4 SV=2	3	Carbamyl, Oxidation, Phospho	7.5	164.7	1	167.7 (M:167.7)	1.1	755.00	537
538		true	tr|F1MJI7|F1MJI7_BOVIN	Uncharacterized protein (Fragment) OS=Bos taurus GN=LMNB2 PE=3 SV=1	4	Carbamyl, Oxidation, Phospho	5.4	68.9	1	167.6 (M:167.6)	4.2	955.51	538
539		true	tr|E1BLB4|E1BLB4_BOVIN	Uncharacterized protein (Fragment) OS=Bos taurus GN=DNAH17 PE=4 SV=2	6	Carbamidomethyl, Carbamyl, Carboxymethyl, Oxidation, Phospho	5.6	501.0	1	167.6 (M:167.6)	1.3	60.22	539
540		true	tr|O02717|O02717_BOVIN	Non-muscle myosin heavy chain (Fragment) OS=Bos taurus PE=2 SV=2	3	Carbamidomethyl, Carbamyl, Phospho	5.2	72.3	1	167.4 (M:167.4)	6.1	9.08	540
541		true	tr|G5E5C8|G5E5C8_BOVIN	Transaldolase OS=Bos taurus GN=TALDO1 PE=3 SV=1	4	Carbamyl, Oxidation	7.0	37.7	3	167.4 (M:167.4)	11.3	764.36	541
542		true	tr|E1BC48|E1BC48_BOVIN	Uncharacterized protein OS=Bos taurus GN=CEP350 PE=4 SV=2	7	Gln->pyro-Glu, Carbamyl, Oxidation, Phospho, Glu->pyro-Glu	6.1	351.7	1	167.4 (M:167.4)	2.7	417.13	542
543		true	tr|F1MGK2|F1MGK2_BOVIN	Uncharacterized protein OS=Bos taurus GN=TET1 PE=4 SV=2	8	Carbamidomethyl, Carbamyl, Oxidation, Phospho	8.2	236.2	1	167.2 (M:167.2)	4.0	446.82	543
544		true	sp|P23805|CONG_BOVIN	Conglutinin OS=Bos taurus GN=CGN1 PE=1 SV=2	3	Carbamidomethyl	5.8	38.0	1	167.1 (M:167.1)	9.7	12.17	544
545		true	tr|E1BKW7|E1BKW7_BOVIN	Uncharacterized protein OS=Bos taurus GN=LOC515330 PE=4 SV=2	7	Carbamyl, Oxidation, Phospho	9.2	303.9	3	167.0 (M:167.0)	1.9	266.90	545
546		true	tr|V9VGN8|V9VGN8_BOVIN	Sperm flagella 2 protein OS=Bos taurus GN=SPEF2 PE=2 SV=1	4	Carbamyl, Oxidation, Phospho	5.2	193.9	5	167.0 (M:167.0)	2.7	383.63	546
547		true	tr|F1MIX6|F1MIX6_BOVIN	Uncharacterized protein (Fragment) OS=Bos taurus GN=DOCK1 PE=4 SV=1	7	Carbamyl, Oxidation, Phospho	7.6	215.3	1	167.0 (M:167.0)	3.8	726.48	547
548		true	tr|E1BME2|E1BME2_BOVIN	AP-3 complex subunit beta OS=Bos taurus GN=AP3B2 PE=3 SV=2	3	Carbamyl, Oxidation, Phospho	5.5	119.4	1	166.8 (M:166.8)	1.3	10.55	548
549		true	tr|F1MXQ3|F1MXQ3_BOVIN	Uncharacterized protein (Fragment) OS=Bos taurus GN=FAM20C PE=4 SV=2	3	Carbamidomethyl, Carbamyl, Oxidation, Phospho	6.3	61.8	1	166.7 (M:166.7)	7.2	10.49	549
550		true	tr|F1MFR8|F1MFR8_BOVIN	Uncharacterized protein (Fragment) OS=Bos taurus GN=LOC101906022 PE=4 SV=1	6	Carbamidomethyl, Carbamyl, Carboxymethyl, Phospho	6.5	137.1	1	166.0 (M:166.0)	5.1	797.59	550
551		true	tr|A4Z4J2|A4Z4J2_BVDV	Genome polyprotein OS=Bovine viral diarrhea virus PE=4 SV=1	4	Carbamidomethyl, Carbamyl, Oxidation, Phospho	8.7	438.3	1	165.8 (M:165.8)	1.1	386.94	551
552		true	tr|E0AE18|E0AE18_BOVIN	Receptor protein-tyrosine kinase OS=Bos taurus GN=EGFR PE=2 SV=1	5	Carbamidomethyl, Carbamyl	6.7	131.5	2	165.8 (M:165.8)	5.4	482.42	552
553		true	tr|E1BNA9|E1BNA9_BOVIN	Uncharacterized protein OS=Bos taurus GN=ZZEF1 PE=4 SV=2	4	Carbamidomethyl, Carbamyl, Carboxymethyl, Oxidation, Phospho, Glu->pyro-Glu	5.6	330.9	1	165.2 (M:165.2)	1.8	15770.07	553
554		true	tr|E9LZ03|E9LZ03_BOVIN	Prominin-1 OS=Bos taurus PE=2 SV=1	4	Carbamyl, Oxidation, Phospho	6.2	99.6	2	165.2 (M:165.2)	5.3	503.55	554
555		true	tr|F1MHW1|F1MHW1_BOVIN	Uncharacterized protein (Fragment) OS=Bos taurus GN=NF1 PE=4 SV=2	4	Carbamidomethyl, Carbamyl, Carboxymethyl, Oxidation, Phospho	6.8	317.3	1	165.0 (M:165.0)	1.7	17.72	555
556		true	tr|T2D3S2|T2D3S2_BVDV	E2 glycoprotein (Fragment) OS=Bovine viral diarrhea virus PE=4 SV=1	4	Oxidation, Phospho	6.2	46.0	1	165.0 (M:165.0)	4.7	1.42	556
557		true	tr|F1MYX8|F1MYX8_BOVIN	Breast cancer type 1 susceptibility protein homolog OS=Bos taurus GN=BRCA1 PE=4 SV=1	4	Carbamyl, Oxidation, Phospho, Glu->pyro-Glu	5.4	206.2	3	164.9 (M:164.9)	2.1	74.49	557
558		true	tr|F1MX87|F1MX87_BOVIN	Uncharacterized protein OS=Bos taurus GN=C8A PE=4 SV=1	4	Carbamidomethyl, Carbamyl, Carboxymethyl, Oxidation	6.2	66.2	3	164.9 (M:164.9)	11.9	14373.52	558
559		true	tr|A0A059UHC5|A0A059UHC5_BVDV	Genome polyprotein OS=Bovine viral diarrhea virus PE=4 SV=1	5	Carbamidomethyl, Carbamyl, Carboxymethyl, Oxidation, Phospho	8.7	437.5	1	164.4 (M:164.4)	1.7	14508.20	559
560		true	sp|Q2KIT0|HP20_BOVIN	Protein HP-20 homolog OS=Bos taurus PE=2 SV=1	3	Carbamidomethyl, Carbamyl, Carboxymethyl, Phospho	8.9	20.6	1	164.4 (M:164.4)	22.0	12.11	560
561		true	tr|F1MMB4|F1MMB4_BOVIN	Uncharacterized protein (Fragment) OS=Bos taurus PE=4 SV=1	7	Carbamidomethyl, Gln->pyro-Glu, Carbamyl, Phospho	6.2	165.3	1	164.3 (M:164.3)	4.5	740.56	561
562		true	sp|Q9N2I2|IPSP_BOVIN	Plasma serine protease inhibitor OS=Bos taurus GN=SERPINA5 PE=1 SV=1	4		9.4	45.3	1	164.2 (M:164.2)	11.6	11.20	562
563		true	tr|E1BC55|E1BC55_BOVIN	Uncharacterized protein OS=Bos taurus GN=KIAA1671 PE=4 SV=2	5	Carbamidomethyl, Carbamyl, Phospho	9.3	193.9	1	164.2 (M:164.2)	3.1	730.57	563
564		true	tr|F1N5P8|F1N5P8_BOVIN	Uncharacterized protein (Fragment) OS=Bos taurus GN=LRRFIP1 PE=4 SV=2	2	Carbamyl, Oxidation, Phospho	5.8	74.6	1	163.8 (M:163.8)	2.9	577.65	564
565		true	tr|F1N3F6|F1N3F6_BOVIN	Uncharacterized protein (Fragment) OS=Bos taurus GN=CHD4 PE=4 SV=2	5	Gln->pyro-Glu, Carbamyl, Oxidation, Phospho	5.7	220.0	3	163.0 (M:163.0)	2.0	607.26	565
566		true	tr|Q0II38|Q0II38_BOVIN	H1FOO protein (Fragment) OS=Bos taurus GN=H1FOO PE=2 SV=1	4	Carbamidomethyl, Carbamyl, Phospho	10.4	24.9	1	162.5 (M:162.5)	14.5	730.64	566
567		true	tr|A6QQK8|A6QQK8_BOVIN	TEX2 protein OS=Bos taurus GN=TEX2 PE=2 SV=1	6	Carbamyl, Phospho	5.9	86.5	3	161.8 (M:161.8)	8.9	521.50	567
568		true	tr|F1N6H1|F1N6H1_BOVIN	Uncharacterized protein (Fragment) OS=Bos taurus GN=LRP2 PE=4 SV=2	4	Carbamidomethyl, Carbamyl, Phospho, Glu->pyro-Glu	5.1	517.3	1	161.6 (M:161.6)	0.6	576.46	568
569		true	tr|E1BIQ8|E1BIQ8_BOVIN	Uncharacterized protein OS=Bos taurus GN=MPP5 PE=4 SV=1	5	Carbamyl	5.8	77.2	1	161.5 (M:161.5)	6.7	773.91	569
570		true	tr|A0A0E3KK96|A0A0E3KK96_BVDV	Genome polyprotein OS=Bovine viral diarrhea virus PE=4 SV=1	4	Carbamidomethyl, Carbamyl, Carboxymethyl, Oxidation, Phospho	8.8	437.8	1	161.4 (M:161.4)	1.6	28.75	570
571		true	tr|F1MEW3|F1MEW3_BOVIN	Microtubule-associated protein OS=Bos taurus GN=MAP2 PE=4 SV=1	4	Carbamyl, Phospho, Glu->pyro-Glu	4.8	199.2	3	161.3 (M:161.3)	2.1	862.29	571
572		true	tr|F1N4W5|F1N4W5_BOVIN	Membrane cofactor protein OS=Bos taurus GN=CD46 PE=4 SV=2	3	Carbamidomethyl, Carboxymethyl	6.8	39.9	18	160.7 (M:160.7)	8.2	16267.03	572
573		true	tr|F1MSD7|F1MSD7_BOVIN	Phosphoinositide phospholipase C OS=Bos taurus GN=PLCB4 PE=4 SV=2	6	Carbamidomethyl, Carbamyl, Carboxymethyl, Oxidation, Phospho	6.4	136.1	4	160.7 (M:160.7)	4.9	536.29	573
574		true	sp|Q148H8|K2C72_BOVIN	Keratin, type II cytoskeletal 72 OS=Bos taurus GN=KRT72 PE=2 SV=1	3	Carbamidomethyl, Carbamyl, Carboxymethyl, Phospho	7.9	56.9	1	160.7 (M:160.7)	5.9	19692.54	574
575		true	tr|F1N7B7|F1N7B7_BOVIN	Uncharacterized protein (Fragment) OS=Bos taurus GN=RIMS1 PE=4 SV=2	6	Carbamidomethyl, Carbamyl, Carboxymethyl, Oxidation, Phospho	9.8	170.7	1	160.6 (M:160.6)	4.4	620.78	575
576		true	tr|E1BGU2|E1BGU2_BOVIN	Uncharacterized protein (Fragment) OS=Bos taurus GN=CLASP1 PE=4 SV=2	5	Carbamyl, Oxidation, Phospho	9.3	162.2	2	160.2 (M:160.2)	3.9	498.22	576
577		true	tr|F1MM13|F1MM13_BOVIN	Uncharacterized protein (Fragment) OS=Bos taurus GN=H6PD PE=4 SV=2	3	Carbamidomethyl, Carbamyl, Oxidation, Phospho	6.3	88.9	2	160.0 (M:160.0)	6.1	32.24	577
578		true	sp|P10096|G3P_BOVIN	Glyceraldehyde-3-phosphate dehydrogenase OS=Bos taurus GN=GAPDH PE=1 SV=4	2	Carbamidomethyl, Oxidation	8.5	35.8	8	159.7 (M:159.7)	8.4	10.66	578
579		true	tr|Q3ZBY4|Q3ZBY4_BOVIN	Aldolase C, fructose-bisphosphate OS=Bos taurus GN=ALDOC PE=2 SV=2	4		6.2	39.4	1	159.5 (M:159.5)	14.8	11.28	579
580		true	tr|G3N1H5|G3N1H5_BOVIN	Uncharacterized protein OS=Bos taurus GN=LOC100300806 PE=4 SV=1	2	Carbamidomethyl	8.6	14.1	7	159.5 (M:159.5)	23.5	17.28	580
581		true	tr|G1EUL2|G1EUL2_BHV4	Putative uncharacterized protein ORF 56 OS=Bovine herpesvirus 4 GN=ORF 56 PE=4 SV=1	6	Carbamyl, Oxidation, Phospho, Glu->pyro-Glu	8.6	96.9	3	159.4 (M:159.4)	2.8	308.61	581
582		true	tr|F1N1P8|F1N1P8_BOVIN	Uncharacterized protein OS=Bos taurus GN=PPP1R26 PE=4 SV=2	6	Carbamidomethyl, Carbamyl, Carboxymethyl, Oxidation, Phospho	9.0	122.9	1	159.0 (M:159.0)	5.6	930.00	582
583		true	tr|F1MC48|F1MC48_BOVIN	Uncharacterized protein OS=Bos taurus GN=IQGAP1 PE=4 SV=2	5	Carbamyl, Oxidation, Phospho	6.2	182.7	1	159.0 (M:159.0)	2.4	38.81	583
584		true	tr|E1BCE1|E1BCE1_BOVIN	Uncharacterized protein OS=Bos taurus GN=ATAD5 PE=4 SV=1	5	Carbamidomethyl, Carbamyl, Carboxymethyl, Phospho	9.3	208.0	1	158.6 (M:158.6)	3.4	14833.34	584
585		true	tr|F1MJY2|F1MJY2_BOVIN	Uncharacterized protein (Fragment) OS=Bos taurus GN=RAPGEF1 PE=4 SV=2	4	Carbamidomethyl, Carbamyl, Oxidation, Phospho	5.8	137.5	1	158.3 (M:158.3)	3.4	30.75	585
586		true	tr|F1MHF3|F1MHF3_BOVIN	Uncharacterized protein OS=Bos taurus GN=NAV2 PE=4 SV=2	4	Carbamidomethyl, Carbamyl, Carboxymethyl, Oxidation, Phospho, Glu->pyro-Glu	9.0	254.3	1	158.2 (M:158.2)	2.2	677.07	586
587		true	tr|F1MTE8|F1MTE8_BOVIN	Phosphoinositide phospholipase C OS=Bos taurus GN=PLCE1 PE=4 SV=2	6	Carbamidomethyl, Gln->pyro-Glu, Carbamyl, Carboxymethyl, Phospho	6.0	257.3	1	158.0 (M:158.0)	2.1	799.11	587
588		true	tr|F1MBT6|F1MBT6_BOVIN	Uncharacterized protein (Fragment) OS=Bos taurus GN=ANLN PE=4 SV=2	6	Carbamidomethyl, Carbamyl, Carboxymethyl, Oxidation, Phospho, Glu->pyro-Glu	8.0	124.5	1	158.0 (M:158.0)	4.2	15481.49	588
589		true	tr|F1MLY0|F1MLY0_BOVIN	Kinesin-like protein OS=Bos taurus GN=KIF1A PE=3 SV=2	4	Carbamidomethyl, Carbamyl, Carboxymethyl, Oxidation, Phospho	5.4	201.3	1	157.8 (M:157.8)	2.6	675.48	589
590		true	tr|F1N7G8|F1N7G8_BOVIN	Uncharacterized protein OS=Bos taurus GN=PDS5B PE=4 SV=2	5	Carbamidomethyl, Carbamyl, Carboxymethyl, Oxidation, Phospho	8.6	164.5	1	157.8 (M:157.8)	2.0	347.13	590
591		true	tr|F1N789|F1N789_BOVIN	Uncharacterized protein OS=Bos taurus GN=VCL PE=4 SV=1	4	Carbamyl, Phospho, Glu->pyro-Glu	5.6	123.8	3	157.7 (M:157.7)	4.0	38.73	591
592		true	tr|G3MXG6|G3MXG6_BOVIN	Uncharacterized protein (Fragment) OS=Bos taurus PE=4 SV=1	2	Carbamidomethyl, Carbamyl, Carboxymethyl, Phospho	9.5	14.7	1	157.5 (M:157.5)	25.9	17.94	592
593		true	tr|F1ME99|F1ME99_BOVIN	Uncharacterized protein OS=Bos taurus GN=CEP135 PE=4 SV=2	5	Carbamyl, Oxidation, Phospho, Glu->pyro-Glu	6.2	133.5	2	157.1 (M:157.1)	4.5	471.58	593
594		true	sp|P04272|ANXA2_BOVIN	Annexin A2 OS=Bos taurus GN=ANXA2 PE=1 SV=2	4	Carbamyl, Phospho	6.9	38.6	1	157.1 (M:157.1)	14.5	10.35	594
595		true	tr|E1BCK1|E1BCK1_BOVIN	Uncharacterized protein OS=Bos taurus GN=RIF1 PE=4 SV=2	2	Carbamyl, Oxidation, Phospho	5.4	273.8	1	157.0 (M:157.0)	0.6	789.48	595
596		true	tr|E1BHK3|E1BHK3_BOVIN	Uncharacterized protein OS=Bos taurus GN=GREB1L PE=4 SV=2	5	Carbamidomethyl, Carbamyl, Carboxymethyl, Oxidation, Phospho, Glu->pyro-Glu	6.3	209.9	1	156.5 (M:156.5)	4.0	5987.52	596
597		true	tr|G3N148|G3N148_BOVIN	Uncharacterized protein (Fragment) OS=Bos taurus GN=LOC101905477 PE=4 SV=1	2	Carbamidomethyl, Carbamyl, Carboxymethyl, Phospho	9.5	14.8	2	156.4 (M:156.4)	30.9	345.68	597
598		true	tr|Q2PS14|Q2PS14_BOVIN	MHC class I antigen (Fragment) OS=Bos taurus GN=BoLA-N PE=2 SV=1	3	Carbamidomethyl, Carbamyl	5.4	40.0	28	156.0 (M:156.0)	10.2	9.70	598
599		true	tr|Q6Q144|Q6Q144_BOVIN	Reelin (Fragment) OS=Bos taurus GN=RELN PE=2 SV=1	4	Carbamidomethyl, Gln->pyro-Glu, Carbamyl, Carboxymethyl, Phospho	6.0	338.6	4	156.0 (M:156.0)	1.5	27358.22	599
600		true	sp|Q5E946|PARK7_BOVIN	Protein deglycase DJ-1 OS=Bos taurus GN=PARK7 PE=2 SV=1	7	Carbamidomethyl, Carbamyl	6.8	20.0	1	155.9 (M:155.9)	37.6	259.34	600
601		true	tr|F1MH45|F1MH45_BOVIN	Non-specific serine/threonine protein kinase OS=Bos taurus GN=CDC42BPA PE=4 SV=2	6	Carbamidomethyl, Carbamyl, Carboxymethyl, Phospho	6.1	195.5	1	155.8 (M:155.8)	3.3	353.63	601
602		true	tr|G5E556|G5E556_BOVIN	Uncharacterized protein OS=Bos taurus GN=ABCA12 PE=3 SV=1	1	Carbamidomethyl, Carbamyl, Carboxymethyl, Oxidation, Phospho	8.3	285.5	1	155.8 (M:155.8)	0.4	25.00	602
603		true	tr|G3N0U2|G3N0U2_BOVIN	Uncharacterized protein OS=Bos taurus GN=CCNB3 PE=3 SV=1	4	Carbamyl, Oxidation, Phospho	8.8	144.8	1	155.2 (M:155.2)	3.7	781.09	603
604		true	tr|M1ZMP2|M1ZMP2_BOVIN	Aldehyde oxidase 1 OS=Bos taurus PE=2 SV=1	2	Carbamidomethyl, Carbamyl, Carboxymethyl, Oxidation, Phospho	7.1	147.2	3	154.9 (M:154.9)	1.1	1256.04	604
605		true	tr|E1BNA3|E1BNA3_BOVIN	Uncharacterized protein OS=Bos taurus GN=AP4E1 PE=4 SV=2	6	Gln->pyro-Glu, Carbamyl, Phospho, Glu->pyro-Glu	5.6	127.9	1	154.4 (M:154.4)	4.0	625.24	605
606		true	tr|F1MHC2|F1MHC2_BOVIN	Uncharacterized protein OS=Bos taurus GN=STXBP2 PE=4 SV=1	3	Carbamidomethyl, Carbamyl, Phospho	6.4	66.3	5	154.4 (M:154.4)	6.7	517.25	606
607		true	tr|E1BGX8|E1BGX8_BOVIN	Uncharacterized protein OS=Bos taurus GN=HHIPL2 PE=4 SV=1	4	Carbamidomethyl, Carbamyl, Phospho	9.4	81.1	1	154.1 (M:154.1)	5.7	12.22	607
608		true	tr|F1MWB6|F1MWB6_BOVIN	Uncharacterized protein OS=Bos taurus GN=SH3D21 PE=4 SV=2	3	Carbamyl, Oxidation, Phospho	6.0	74.7	1	153.8 (M:153.8)	4.0	855.54	608
609		true	tr|E1BH45|E1BH45_BOVIN	Uncharacterized protein OS=Bos taurus GN=RB1CC1 PE=4 SV=1	2	Carbamidomethyl, Gln->pyro-Glu, Carbamyl, Phospho, Glu->pyro-Glu	5.3	181.6	1	153.7 (M:153.7)	1.4	29.53	609
610		true	tr|E1BFE2|E1BFE2_BOVIN	Uncharacterized protein (Fragment) OS=Bos taurus GN=PTPRB PE=4 SV=2	6	Carbamidomethyl, Carbamyl, Oxidation, Phospho	8.9	256.5	1	153.6 (M:153.6)	2.9	422.46	610
611		true	tr|G3MYZ7|G3MYZ7_BOVIN	Ubiquitin carboxyl-terminal hydrolase (Fragment) OS=Bos taurus GN=USP34 PE=3 SV=1	4	Carbamidomethyl, Carbamyl, Oxidation, Phospho	5.5	405.4	2	153.5 (M:153.5)	1.2	729.12	611
612		true	tr|F1MXS1|F1MXS1_BOVIN	E3 SUMO-protein ligase RanBP2 OS=Bos taurus GN=RANBP2 PE=4 SV=1	6	Carbamyl, Oxidation, Phospho	5.5	336.6	2	153.4 (M:153.4)	2.1	42.51	612
613		true	tr|A6QQZ9|A6QQZ9_BOVIN	PARP14 protein (Fragment) OS=Bos taurus GN=PARP14 PE=2 SV=1	3	Carbamyl, Oxidation, Phospho	7.5	173.8	3	153.4 (M:153.4)	1.9	423.42	613
614		true	sp|Q3HNG7|H1FOO_BOVIN	Histone H1oo OS=Bos taurus GN=H1FOO PE=1 SV=1	4	Carbamyl, Phospho	10.9	35.4	2	153.3 (M:153.3)	11.4	581.16	614
615		true	tr|F1MSC3|F1MSC3_BOVIN	Uncharacterized protein OS=Bos taurus GN=ACACB PE=4 SV=2	3	Carbamidomethyl, Carbamyl, Carboxymethyl, Oxidation, Phospho, Glu->pyro-Glu	6.0	262.5	2	153.1 (M:153.1)	1.0	994.94	615
616		true	tr|E1BK86|E1BK86_BOVIN	Uncharacterized protein OS=Bos taurus GN=PKHD1 PE=4 SV=2	5	Carbamidomethyl, Carbamyl, Carboxymethyl, Oxidation, Phospho	6.3	443.9	1	153.0 (M:153.0)	1.3	22328.84	616
617		true	tr|E1BPY8|E1BPY8_BOVIN	DNA polymerase OS=Bos taurus GN=REV3L PE=3 SV=2	4	Carbamidomethyl, Gln->pyro-Glu, Carbamyl, Oxidation, Phospho	8.8	352.9	1	152.9 (M:152.9)	1.7	23.55	617
618		true	sp|P79114|MYO10_BOVIN	Unconventional myosin-X OS=Bos taurus GN=MYO10 PE=1 SV=1	5	Carbamyl, Phospho	6.0	235.7	3	152.8 (M:152.8)	1.9	576.08	618
619		true	sp|Q27991|MYH10_BOVIN	Myosin-10 OS=Bos taurus GN=MYH10 PE=2 SV=2	5	Carbamyl, Oxidation, Phospho	5.4	229.0	1	152.7 (M:152.7)	2.0	557.54	619
620		true	tr|G5E5U4|G5E5U4_BOVIN	Uncharacterized protein OS=Bos taurus GN=LOC781675 PE=4 SV=1	3	Gln->pyro-Glu, Carbamyl, Oxidation, Phospho	5.2	68.6	1	152.5 (M:152.5)	4.3	862.45	620
621		true	sp|P63048|RL40_BOVIN	Ubiquitin-60S ribosomal protein L40 OS=Bos taurus GN=UBA52 PE=1 SV=2	3	Carbamyl, Phospho	9.9	14.7	5	152.5 (M:152.5)	26.6	12.51	621
622		true	tr|F1MFW9|F1MFW9_BOVIN	Uncharacterized protein (Fragment) OS=Bos taurus GN=KRT24 PE=3 SV=2	3	Carbamidomethyl, Carbamyl, Oxidation, Phospho	4.7	50.7	1	152.4 (M:152.4)	6.0	18.99	622
623		true	tr|E1BH79|E1BH79_BOVIN	Uncharacterized protein OS=Bos taurus GN=EFTUD1 PE=4 SV=2	4	Carbamyl, Oxidation, Phospho	5.6	126.1	1	152.3 (M:152.3)	3.6	488.08	623
624		true	sp|Q5E9F5|TAGL2_BOVIN	Transgelin-2 OS=Bos taurus GN=TAGLN2 PE=2 SV=3	3	Gln->pyro-Glu, Oxidation	8.4	22.4	1	152.3 (M:152.3)	18.6	8.58	624
625		true	tr|E1BAT3|E1BAT3_BOVIN	Uncharacterized protein OS=Bos taurus GN=LIFR PE=4 SV=1	5	Carbamidomethyl, Carbamyl, Oxidation, Phospho	5.5	123.1	1	152.2 (M:152.2)	4.2	382.24	625
626		true	tr|E1BNV7|E1BNV7_BOVIN	Uncharacterized protein OS=Bos taurus GN=MYO9B PE=4 SV=2	4	Carbamidomethyl, Carbamyl, Carboxymethyl, Oxidation, Phospho	8.8	243.6	1	152.1 (M:152.1)	1.9	16187.88	626
627		true	tr|F1N2G9|F1N2G9_BOVIN	Uncharacterized protein OS=Bos taurus GN=FAM208A PE=4 SV=2	6	Carbamidomethyl, Carbamyl, Carboxymethyl, Phospho, Glu->pyro-Glu	5.6	182.7	2	151.9 (M:151.9)	3.6	848.42	627
628		true	tr|E1BQ15|E1BQ15_BOVIN	Uncharacterized protein OS=Bos taurus GN=CLASP2 PE=4 SV=2	5	Carbamyl, Oxidation, Phospho	8.6	168.1	1	151.6 (M:151.6)	3.2	751.34	628
629		true	tr|F1MLZ4|F1MLZ4_BOVIN	Lysosomal-trafficking regulator OS=Bos taurus GN=LYST PE=4 SV=2	6	Carbamyl, Oxidation, Phospho	6.0	428.3	2	151.6 (M:151.6)	1.3	646.33	629
630		true	tr|A6QPL5|A6QPL5_BOVIN	Diacylglycerol kinase OS=Bos taurus GN=DGKH PE=2 SV=1	3	Carbamidomethyl, Carbamyl, Carboxymethyl, Oxidation, Phospho	7.9	133.9	3	151.5 (M:151.5)	2.7	18486.33	630
631		true	sp|Q3ZCJ2|AK1A1_BOVIN	Alcohol dehydrogenase [NADP(+)] OS=Bos taurus GN=AKR1A1 PE=2 SV=1	5	Carbamidomethyl, Carbamyl, Oxidation, Phospho	6.8	36.6	1	151.1 (M:151.1)	16.6	12.88	631
632		true	tr|E1BHN4|E1BHN4_BOVIN	Uncharacterized protein OS=Bos taurus GN=RNF213 PE=4 SV=2	6	Carbamidomethyl, Carbamyl, Carboxymethyl, Oxidation, Phospho	6.4	374.0	2	151.1 (M:151.1)	1.9	545.80	632
633		true	tr|F1MME1|F1MME1_BOVIN	Protein-tyrosine-phosphatase OS=Bos taurus GN=PTPRK PE=4 SV=2	4	Carbamyl, Phospho	5.6	162.9	1	151.0 (M:151.0)	3.7	499.48	633
634		true	tr|F1MCP5|F1MCP5_BOVIN	Kinesin-like protein (Fragment) OS=Bos taurus GN=KIF4A PE=3 SV=1	6	Carbamyl, Oxidation, Phospho, Glu->pyro-Glu	6.2	140.4	1	150.9 (M:150.9)	4.2	372.85	634
635		true	tr|Q9TS83|Q9TS83_BOVIN	AP-1 BETA 1, AP-1 BETA'=GOLGI adaptor protein BETA 1 (BETA') subunit (Fragments) OS=Bos taurus PE=1 SV=1	5	Carbamyl, Oxidation	4.5	22.3	1	150.9 (M:150.9)	5.2	624.40	635
636		true	tr|F1MKQ9|F1MKQ9_BOVIN	Uveal autoantigen with coiled-coil domains and ankyrin repeats protein OS=Bos taurus GN=UACA PE=4 SV=2	6	Carbamyl, Oxidation, Phospho, Glu->pyro-Glu	6.4	161.2	3	150.6 (M:150.6)	3.6	654.35	636
637		true	sp|Q148C9|HEBP1_BOVIN	Heme-binding protein 1 OS=Bos taurus GN=HEBP1 PE=2 SV=1	3		5.4	21.2	2	150.6 (M:150.6)	18.8	11.09	637
638		true	sp|P39873|RNBR_BOVIN	Brain ribonuclease OS=Bos taurus GN=BRN PE=1 SV=3	4	Carbamidomethyl, Gln->pyro-Glu, Oxidation	9.5	18.4	1	150.6 (M:150.6)	18.0	15.46	638
639		true	tr|F1MG24|F1MG24_BOVIN	Uncharacterized protein OS=Bos taurus GN=ABCA1 PE=3 SV=1	2	Carbamidomethyl, Carbamyl, Oxidation, Phospho	6.8	254.1	2	150.5 (M:150.5)	1.2	627.75	639
640		true	sp|Q3T0A3|CFAD_BOVIN	Complement factor D OS=Bos taurus GN=CFD PE=2 SV=1	3	Carbamidomethyl	7.6	27.9	1	150.5 (M:150.5)	22.8	10.89	640
641		true	tr|F1MYP2|F1MYP2_BOVIN	Phospholipase D2 OS=Bos taurus GN=PLD2 PE=4 SV=2	3	Carbamyl, Oxidation, Phospho	8.4	102.5	2	150.3 (M:150.3)	3.2	475.35	641
642		true	tr|E5LP71|E5LP71_PI3B	RNA-directed RNA polymerase L OS=Bovine parainfluenza 3 virus PE=3 SV=1	6	Carbamyl, Oxidation, Phospho	6.2	256.5	4	150.3 (M:150.3)	3.0	235.10	642
643		true	tr|F1MGR1|F1MGR1_BOVIN	Sodium/nucleoside cotransporter OS=Bos taurus GN=SLC28A3 PE=3 SV=2	4	Carbamyl, Oxidation, Phospho	7.2	77.2	2	150.3 (M:150.3)	6.6	12.60	643
644		true	sp|Q1LZE9|PRS23_BOVIN	Serine protease 23 OS=Bos taurus GN=PRSS23 PE=2 SV=1	3	Carbamidomethyl	9.5	42.4	1	150.2 (M:150.2)	9.3	9.60	644
645		true	tr|F1N3K0|F1N3K0_BOVIN	Uncharacterized protein (Fragment) OS=Bos taurus GN=DOCK2 PE=4 SV=2	5	Carbamyl, Oxidation, Phospho	6.3	211.2	1	150.1 (M:150.1)	3.4	405.40	645
646		true	tr|F6S1Q0|F6S1Q0_BOVIN	Uncharacterized protein OS=Bos taurus GN=KRT18 PE=3 SV=1	4		5.3	47.9	4	150.0 (M:150.0)	8.4	483.31	646
647		true	tr|G3X701|G3X701_BOVIN	Uncharacterized protein (Fragment) OS=Bos taurus GN=LOC100300091 PE=3 SV=1	4	Carbamidomethyl	4.5	19.3	1	150.0 (M:150.0)	32.9	12.33	647
648		true	tr|F1MLS2|F1MLS2_BOVIN	Uncharacterized protein (Fragment) OS=Bos taurus GN=TRIO PE=4 SV=2	7	Carbamidomethyl, Carbamyl, Oxidation, Phospho, Glu->pyro-Glu	6.2	344.0	2	149.9 (M:149.9)	2.0	611.21	648
649		true	tr|F1MHA5|F1MHA5_BOVIN	Uncharacterized protein (Fragment) OS=Bos taurus GN=RYR3 PE=4 SV=2	4	Carbamidomethyl, Carbamyl, Phospho	5.7	555.6	2	149.6 (M:149.6)	0.7	671.53	649
650		true	tr|F1MJ95|F1MJ95_BOVIN	Uncharacterized protein OS=Bos taurus GN=UNC80 PE=4 SV=2	3	Carbamidomethyl, Carbamyl, Carboxymethyl, Oxidation, Phospho	6.5	370.7	1	149.6 (M:149.6)	1.0	423.47	650
651		true	tr|F1MHG5|F1MHG5_BOVIN	Uncharacterized protein (Fragment) OS=Bos taurus GN=ARHGAP21 PE=4 SV=2	3	Carbamyl, Oxidation, Phospho	8.1	215.1	1	149.4 (M:149.4)	1.2	646.15	651
652		true	tr|F1N0Q2|F1N0Q2_BOVIN	Uncharacterized protein OS=Bos taurus GN=AKAP6 PE=4 SV=2	4	Carbamidomethyl, Carbamyl, Oxidation, Phospho	4.9	256.0	1	148.9 (M:148.9)	1.5	820.02	652
653		true	tr|E1BHU1|E1BHU1_BOVIN	Uncharacterized protein OS=Bos taurus GN=TCOF1 PE=4 SV=1	4	Carbamyl, Phospho	9.2	151.2	1	148.8 (M:148.8)	3.3	685.00	653
654		true	tr|E1BDS6|E1BDS6_BOVIN	Uncharacterized protein OS=Bos taurus GN=TP53BP1 PE=4 SV=1	4	Carbamidomethyl, Carbamyl, Carboxymethyl, Oxidation, Phospho	4.6	212.3	1	148.8 (M:148.8)	2.9	20292.91	654
655		true	tr|G3MYM8|G3MYM8_BOVIN	Lipid phosphate phosphatase-related protein type 2 OS=Bos taurus GN=PRG4 PE=4 SV=1	6	Carbamyl, Phospho, Glu->pyro-Glu	9.2	116.8	4	148.6 (M:148.6)	5.9	639.57	655
656		true	sp|A7E3W2|LG3BP_BOVIN	Galectin-3-binding protein OS=Bos taurus GN=LGALS3BP PE=1 SV=1	6	Carbamidomethyl, Carboxymethyl, Phospho	5.4	62.1	1	148.6 (M:148.6)	12.4	11761.15	656
657		true	tr|F1MFC2|F1MFC2_BOVIN	Uncharacterized protein OS=Bos taurus GN=DSG2 PE=4 SV=2	5	Carbamidomethyl, Carbamyl, Carboxymethyl, Oxidation, Phospho	5.1	121.5	1	148.5 (M:148.5)	5.6	18858.28	657
658		true	sp|P62285|ASPM_BOVIN	Abnormal spindle-like microcephaly-associated protein homolog (Fragment) OS=Bos taurus GN=ASPM PE=2 SV=1	7	Carbamyl, Phospho	11.1	395.6	3	148.3 (M:148.3)	1.8	421.36	658
659		true	tr|E1BH93|E1BH93_BOVIN	Uncharacterized protein (Fragment) OS=Bos taurus GN=MAST4 PE=4 SV=2	3	Carbamyl, Oxidation, Phospho	8.6	252.9	4	148.3 (M:148.3)	1.8	676.57	659
660		true	sp|Q28046|ADSV_BOVIN	Adseverin OS=Bos taurus GN=SCIN PE=1 SV=1	3	Carbamyl, Phospho	5.7	80.5	4	148.2 (M:148.2)	4.2	493.97	660
661		true	tr|E1BLC3|E1BLC3_BOVIN	Uncharacterized protein OS=Bos taurus GN=ANKRD26 PE=4 SV=2	2	Carbamidomethyl, Carbamyl, Carboxymethyl, Oxidation, Phospho	5.4	193.8	1	147.9 (M:147.9)	1.5	23825.89	661
662		true	tr|F1MU39|F1MU39_BOVIN	Uncharacterized protein (Fragment) OS=Bos taurus GN=MYH15 PE=4 SV=2	4	Carbamidomethyl, Carbamyl, Oxidation, Phospho	6.2	223.7	1	147.7 (M:147.7)	2.0	536.95	662
663		true	tr|K4HIF9|K4HIF9_ARV	RNA-directed RNA polymerase L OS=Adelaide River virus GN=L PE=4 SV=1	3	Carbamidomethyl, Carbamyl, Oxidation, Phospho	8.7	248.5	2	147.6 (M:147.6)	2.1	419.01	663
664		true	tr|E1BP91|E1BP91_BOVIN	Uncharacterized protein OS=Bos taurus GN=NPEPPS PE=4 SV=2	5	Gln->pyro-Glu, Carbamyl, Oxidation, Phospho	5.6	103.5	1	147.5 (M:147.5)	6.2	302.78	664
665		true	tr|E1BMK9|E1BMK9_BOVIN	Uncharacterized protein OS=Bos taurus GN=CNTLN PE=4 SV=2	4	Carbamyl, Oxidation, Phospho	8.5	163.0	1	147.2 (M:147.2)	2.6	626.56	665
666		true	tr|F1MBL6|F1MBL6_BOVIN	Uncharacterized protein (Fragment) OS=Bos taurus GN=SMG1 PE=4 SV=1	6	Carbamidomethyl, Carbamyl, Oxidation, Phospho	6.0	407.6	1	147.2 (M:147.2)	1.1	418.39	666
667		true	tr|F1MDB9|F1MDB9_BOVIN	Uncharacterized protein (Fragment) OS=Bos taurus GN=TACC2 PE=4 SV=2	3	Carbamidomethyl, Carbamyl, Carboxymethyl, Oxidation, Phospho	4.6	296.9	2	146.6 (M:146.6)	1.7	476.11	667
668		true	tr|G3MYM4|G3MYM4_BOVIN	Uncharacterized protein OS=Bos taurus GN=ZNF292 PE=4 SV=1	4	Carbamidomethyl, Carbamyl, Oxidation, Phospho	7.8	303.5	1	146.5 (M:146.5)	2.2	663.16	668
669		true	tr|F1N6L3|F1N6L3_BOVIN	Protein-tyrosine-phosphatase OS=Bos taurus GN=PTPN22 PE=4 SV=2	3	Carbamyl, Oxidation, Phospho	8.6	87.7	1	146.4 (M:146.4)	4.2	327.03	669
670		true	tr|A5D7E0|A5D7E0_BOVIN	RAB35 protein OS=Bos taurus GN=RAB35 PE=2 SV=1	3	Carbamyl, Phospho	8.5	23.0	2	146.1 (M:146.1)	18.4	10.95	670
671		true	tr|E1BKX3|E1BKX3_BOVIN	Uncharacterized protein OS=Bos taurus GN=MYBBP1A PE=4 SV=1	5	Carbamyl, Phospho	9.3	151.9	1	145.8 (M:145.8)	1.0	34.27	671
672		true	sp|Q58CQ9|VNN1_BOVIN	Pantetheinase OS=Bos taurus GN=VNN1 PE=2 SV=1	4	Carbamidomethyl, Carbamyl, Phospho	5.3	56.9	1	145.7 (M:145.7)	12.2	10.73	672
673		true	tr|A7YY47|A7YY47_BOVIN	LMNB1 protein OS=Bos taurus GN=LMNB1 PE=2 SV=1	5	Carbamyl, Phospho	5.1	66.4	2	145.6 (M:145.6)	9.9	36.52	673
674		true	tr|F1MM16|F1MM16_BOVIN	Uncharacterized protein (Fragment) OS=Bos taurus GN=CTNND2 PE=4 SV=2	7	Carbamidomethyl, Carbamyl, Phospho	8.2	122.9	1	145.4 (M:145.4)	6.3	570.69	674
675		true	tr|F1MEN7|F1MEN7_BOVIN	Uncharacterized protein OS=Bos taurus GN=KIAA1524 PE=4 SV=2	4	Carbamidomethyl, Carbamyl, Oxidation, Phospho	5.9	102.3	2	145.2 (M:145.2)	4.3	22.43	675
676		true	tr|E1BM94|E1BM94_BOVIN	Uncharacterized protein OS=Bos taurus GN=CCDC57 PE=4 SV=2	4	Carbamidomethyl, Carbamyl, Oxidation, Phospho	6.0	97.9	2	145.0 (M:145.0)	2.3	848.52	676
677		true	tr|F1MMR9|F1MMR9_BOVIN	Uncharacterized protein OS=Bos taurus GN=SBF2 PE=4 SV=2	4	Carbamidomethyl, Carbamyl, Carboxymethyl, Oxidation, Phospho	6.6	208.1	3	145.0 (M:145.0)	2.2	31406.45	677
678		true	tr|G3X6B3|G3X6B3_BOVIN	Uncharacterized protein OS=Bos taurus GN=PRRC2C PE=4 SV=1	4	Carbamyl, Oxidation, Phospho	9.2	311.2	3	144.9 (M:144.9)	1.8	50.31	678
679		true	sp|Q27966-2|MYO1C_BOVIN	Isoform 2 of Unconventional myosin-Ic OS=Bos taurus GN=MYO1C	4	Carbamidomethyl, Carbamyl, Oxidation, Phospho	9.3	118.1	3	144.7 (M:144.7)	2.3	517.09	679
680		true	tr|F1MU48|F1MU48_BOVIN	DNA topoisomerase 2 (Fragment) OS=Bos taurus GN=TOP2B PE=3 SV=2	4	Carbamidomethyl, Carbamyl, Phospho	8.4	180.6	1	144.7 (M:144.7)	3.1	738.56	680
681		true	tr|F1MMT2|F1MMT2_BOVIN	Uncharacterized protein (Fragment) OS=Bos taurus GN=LAMA2 PE=4 SV=2	4	Carbamidomethyl, Carbamyl, Carboxymethyl, Phospho	5.8	339.2	1	144.6 (M:144.6)	1.1	21943.93	681
682		true	tr|E1BIA1|E1BIA1_BOVIN	Uncharacterized protein OS=Bos taurus GN=PPFIA3 PE=4 SV=1	3	Carbamyl, Oxidation, Phospho	5.6	133.7	1	144.5 (M:144.5)	3.6	767.85	682
683		true	sp|Q32L50|SBSPO_BOVIN	Somatomedin-B and thrombospondin type-1 domain-containing protein OS=Bos taurus GN=SBSPON PE=2 SV=2	3	Carbamidomethyl	7.7	29.3	1	144.4 (M:144.4)	16.3	9.41	683
684		true	tr|E1BGA4|E1BGA4_BOVIN	Histone-lysine N-methyltransferase OS=Bos taurus GN=ASH1L PE=4 SV=1	7	Carbamyl, Oxidation, Phospho	9.4	332.3	1	144.4 (M:144.4)	3.1	33.27	684
685		true	sp|P25326|CATS_BOVIN	Cathepsin S OS=Bos taurus GN=CTSS PE=1 SV=2	3	Carbamidomethyl	6.9	37.2	1	144.2 (M:144.2)	9.4	10.76	685
686		true	tr|G3N342|G3N342_BOVIN	Uncharacterized protein (Fragment) OS=Bos taurus GN=IGHE PE=4 SV=1	4	Carbamidomethyl, Carbamyl	7.2	47.8	1	144.2 (M:144.2)	10.8	344.50	686
687		true	tr|G3X809|G3X809_BOVIN	Uncharacterized protein OS=Bos taurus GN=CYP46A1 PE=3 SV=1	3	Carbamyl, Oxidation, Phospho	9.5	56.7	2	143.8 (M:143.8)	6.6	347.47	687
688		true	tr|E1BNS3|E1BNS3_BOVIN	Uncharacterized protein OS=Bos taurus GN=BRD4 PE=4 SV=2	4	Carbamidomethyl, Carbamyl, Carboxymethyl, Oxidation	9.2	152.3	1	143.7 (M:143.7)	2.6	17768.92	688
689		true	sp|P35071|CFTR_BOVIN	Cystic fibrosis transmembrane conductance regulator OS=Bos taurus GN=CFTR PE=2 SV=2	3	Carbamidomethyl, Gln->pyro-Glu, Carbamyl, Carboxymethyl, Phospho	9.2	167.7	2	143.7 (M:143.7)	2.2	17228.55	689
690		true	tr|F1MPF3|F1MPF3_BOVIN	Uncharacterized protein (Fragment) OS=Bos taurus GN=FAT2 PE=4 SV=2	4	Phospho	5.0	347.4	1	143.6 (M:143.6)	1.6	450.60	690
691		true	tr|F1MF66|F1MF66_BOVIN	GDNF family receptor alpha-2 OS=Bos taurus GN=GFRA2 PE=4 SV=2	4	Carbamidomethyl, Carbamyl, Oxidation, Phospho	8.1	51.6	2	143.6 (M:143.6)	11.9	10.40	691
692		true	sp|Q3SZ62|PGAM1_BOVIN	Phosphoglycerate mutase 1 OS=Bos taurus GN=PGAM1 PE=2 SV=3	3	Carbamidomethyl, Oxidation	6.7	28.8	3	143.4 (M:143.4)	18.9	10.30	692
693		true	tr|Q2TBX9|Q2TBX9_BOVIN	Integrin alpha FG-GAP repeat containing 1 OS=Bos taurus GN=ITFG1 PE=2 SV=1	4	Carbamidomethyl	5.1	67.8	1	143.3 (M:143.3)	8.0	9.57	693
694		true	tr|E1BA36|E1BA36_BOVIN	Uncharacterized protein OS=Bos taurus GN=SPAG17 PE=4 SV=2	3	Carbamidomethyl, Carbamyl, Phospho	5.8	251.1	1	142.9 (M:142.9)	1.5	700.44	694
695		true	tr|G3MX12|G3MX12_BOVIN	Uncharacterized protein (Fragment) OS=Bos taurus GN=HERC2 PE=4 SV=1	4	Gln->pyro-Glu, Carbamyl, Phospho	5.9	517.9	2	142.8 (M:142.8)	0.8	476.28	695
696		true	sp|Q3MHR7|ARPC2_BOVIN	Actin-related protein 2/3 complex subunit 2 OS=Bos taurus GN=ARPC2 PE=1 SV=1	6	Carbamyl, Oxidation, Phospho, Glu->pyro-Glu	6.8	34.3	2	142.7 (M:142.7)	14.0	475.62	696
697		true	tr|K9MNT8|K9MNT8_BOVIN	Resistin transcript variant 1 OS=Bos taurus GN=RETN PE=2 SV=1	2	Carbamidomethyl	8.0	11.5	2	142.5 (M:142.5)	29.4	14.52	697
698		true	tr|E1BGI6|E1BGI6_BOVIN	Uncharacterized protein OS=Bos taurus GN=DDX54 PE=3 SV=2	4	Carbamyl, Oxidation, Phospho	10.1	97.6	1	142.4 (M:142.4)	4.0	791.80	698
699		true	sp|Q28133|ALL2_BOVIN	Allergen Bos d 2 OS=Bos taurus PE=1 SV=1	3	Carbamidomethyl, Carbamyl	4.7	19.5	1	142.4 (M:142.4)	18.6	11.24	699
700		true	tr|F1N4C7|F1N4C7_BOVIN	Phosphoinositide phospholipase C (Fragment) OS=Bos taurus GN=PLCG2 PE=4 SV=2	2	Carbamidomethyl, Carbamyl, Carboxymethyl, Oxidation, Phospho, Glu->pyro-Glu	6.3	140.2	1	142.3 (M:142.3)	1.6	555.95	700
701		true	tr|E1BF23|E1BF23_BOVIN	Uncharacterized protein OS=Bos taurus GN=MYOM2 PE=4 SV=2	4	Carbamyl, Oxidation, Phospho	6.0	165.2	2	142.2 (M:142.2)	3.1	409.26	701
702		true	sp|Q3SZB7|F16P1_BOVIN	Fructose-1,6-bisphosphatase 1 OS=Bos taurus GN=FBP1 PE=2 SV=3	4	Carbamidomethyl, Carbamyl, Phospho	6.5	36.7	4	142.2 (M:142.2)	22.2	18.62	702
703		true	tr|Q7M365|Q7M365_BOVIN	Haptoglobin (Fragments) OS=Bos taurus PE=1 SV=1	2	Carbamidomethyl	4.6	4.7	1	142.2 (M:142.2)	48.9	14.31	703
704		true	sp|P41357|L_RINDR	RNA-directed RNA polymerase L OS=Rinderpest virus (strain RBOK) GN=L PE=3 SV=1	4	Carbamidomethyl, Carbamyl, Oxidation, Phospho	8.4	248.0	2	142.1 (M:142.1)	1.7	922.90	704
705		true	tr|E1BB16|E1BB16_BOVIN	Uncharacterized protein OS=Bos taurus GN=GCC2 PE=4 SV=2	5	Carbamyl, Oxidation, Phospho	5.1	195.3	1	142.1 (M:142.1)	2.8	775.85	705
706		true	tr|F1N1J2|F1N1J2_BOVIN	Pro-interleukin-16 OS=Bos taurus GN=IL16 PE=4 SV=2	5	Carbamidomethyl, Carbamyl, Carboxymethyl, Oxidation, Phospho	8.6	141.5	2	141.8 (M:141.8)	5.0	10893.19	706
707		true	tr|A1L558|A1L558_BOVIN	RAP guanine-nucleotide-exchange factor 3 OS=Bos taurus GN=RAPGEF3 PE=2 SV=1	4	Carbamyl, Oxidation, Phospho, Glu->pyro-Glu	7.9	103.7	2	141.8 (M:141.8)	5.5	440.04	707
708		true	tr|F1MSU6|F1MSU6_BOVIN	Uncharacterized protein (Fragment) OS=Bos taurus GN=PHF8 PE=4 SV=1	3	Carbamyl, Phospho	8.7	113.5	1	141.8 (M:141.8)	3.0	758.01	708
709		true	sp|Q2KJC9|AL7A1_BOVIN	Alpha-aminoadipic semialdehyde dehydrogenase OS=Bos taurus GN=ALDH7A1 PE=2 SV=4	4	Carbamyl, Oxidation, Phospho, Glu->pyro-Glu	6.7	58.5	2	141.6 (M:141.6)	9.5	528.83	709
710		true	sp|E1BLZ4|ZFY26_BOVIN	Zinc finger FYVE domain-containing protein 26 OS=Bos taurus GN=ZFYVE26 PE=3 SV=1	4	Carbamidomethyl, Carbamyl, Carboxymethyl, Phospho, Glu->pyro-Glu	5.9	280.2	1	141.6 (M:141.6)	1.5	683.27	710
711		true	tr|E1BC85|E1BC85_BOVIN	Uncharacterized protein OS=Bos taurus GN=THADA PE=4 SV=2	5	Carbamidomethyl, Carbamyl, Oxidation, Phospho	6.1	218.7	3	141.6 (M:141.6)	4.1	286.84	711
712		true	tr|F1MHT3|F1MHT3_BOVIN	Uncharacterized protein (Fragment) OS=Bos taurus GN=MYO5A PE=4 SV=2	7	Carbamidomethyl, Carbamyl, Oxidation, Phospho, Glu->pyro-Glu	8.7	215.9	2	141.1 (M:141.1)	3.4	413.61	712
713		true	tr|E1BNI9|E1BNI9_BOVIN	Uncharacterized protein OS=Bos taurus GN=TRPV3 PE=4 SV=2	4	Carbamidomethyl, Carbamyl, Carboxymethyl, Oxidation, Phospho, Glu->pyro-Glu	6.2	90.9	2	141.0 (M:141.0)	4.7	938.86	713
714		true	sp|Q58DH9|NAGAB_BOVIN	Alpha-N-acetylgalactosaminidase OS=Bos taurus GN=NAGA PE=2 SV=1	3		5.2	46.5	2	140.9 (M:140.9)	8.0	490.42	714
715		true	tr|Q0IIG0|Q0IIG0_BOVIN	Nucleolar and coiled-body phosphoprotein 1 OS=Bos taurus GN=NOLC1 PE=2 SV=1	5	Carbamyl, Phospho	9.4	73.3	1	140.8 (M:140.8)	7.6	885.60	715
716		true	tr|E1BDZ3|E1BDZ3_BOVIN	Uncharacterized protein OS=Bos taurus GN=CHD9 PE=4 SV=1	2	Gln->pyro-Glu, Carbamyl, Phospho	6.6	325.9	1	140.7 (M:140.7)	0.7	863.27	716
717		true	tr|A5PJU2|A5PJU2_BOVIN	MMRN1 protein OS=Bos taurus GN=MMRN1 PE=2 SV=1	4	Carbamidomethyl, Carbamyl, Carboxymethyl, Oxidation, Phospho	8.2	121.4	1	140.6 (M:140.6)	4.4	12809.98	717
718		true	tr|G3X6I0|G3X6I0_BOVIN	Uncharacterized protein (Fragment) OS=Bos taurus GN=FCGBP PE=4 SV=1	2		4.8	202.9	1	140.6 (M:140.6)	1.3	10.82	718
719		true	tr|F1MNS0|F1MNS0_BOVIN	Uncharacterized protein OS=Bos taurus GN=HERC1 PE=4 SV=2	7	Carbamidomethyl, Gln->pyro-Glu, Carbamyl, Carboxymethyl, Phospho	5.7	531.2	1	140.5 (M:140.5)	0.9	799.35	719
720		true	sp|Q32PG1|AP3B1_BOVIN	AP-3 complex subunit beta-1 OS=Bos taurus GN=AP3B1 PE=2 SV=1	2	Carbamyl, Phospho	5.9	119.9	1	140.4 (M:140.4)	3.1	380.94	720
721		true	tr|F1MDZ2|F1MDZ2_BOVIN	Neurofilament medium polypeptide OS=Bos taurus GN=NEFM PE=4 SV=2	2	Carbamyl, Phospho	4.9	103.1	2	140.3 (M:140.3)	1.1	51.98	721
722		true	tr|E1BB49|E1BB49_BOVIN	Uncharacterized protein OS=Bos taurus GN=HIPK4 PE=4 SV=2	4	Carbamyl, Oxidation, Phospho	6.6	69.3	1	140.2 (M:140.2)	2.8	636.28	722
723		true	tr|F1MMQ8|F1MMQ8_BOVIN	Uncharacterized protein (Fragment) OS=Bos taurus GN=SPTA1 PE=4 SV=2	5	Carbamyl, Phospho	4.8	281.4	1	140.2 (M:140.2)	1.5	370.53	723
724		true	tr|E1BL39|E1BL39_BOVIN	Uncharacterized protein OS=Bos taurus PE=4 SV=1	5	Carbamidomethyl, Carbamyl, Carboxymethyl, Oxidation, Phospho	7.5	168.9	1	140.1 (M:140.1)	3.0	23332.39	724
725		true	tr|F1N6W9|F1N6W9_BOVIN	Uncharacterized protein OS=Bos taurus GN=COL18A1 PE=4 SV=2	4	Carbamyl, Phospho	5.2	153.8	3	140.0 (M:140.0)	2.9	443.09	725
726		true	tr|E1BBN7|E1BBN7_BOVIN	Kinesin-like protein OS=Bos taurus GN=KIF1B PE=3 SV=2	4	Carbamyl, Oxidation, Phospho	5.5	204.4	1	140.0 (M:140.0)	2.4	790.42	726
727		true	tr|F1MDV3|F1MDV3_BOVIN	Uncharacterized protein (Fragment) OS=Bos taurus GN=SNTB1 PE=4 SV=1	2	Carbamyl, Oxidation	8.4	56.0	1	139.9 (M:139.9)	1.9	564.78	727
728		true	tr|E1BBF0|E1BBF0_BOVIN	Uncharacterized protein OS=Bos taurus GN=STK31 PE=4 SV=2	5	Carbamidomethyl, Carbamyl, Carboxymethyl, Phospho	5.3	115.1	1	139.7 (M:139.7)	2.6	591.82	728
729		true	sp|Q0VCP4|SEPT8_BOVIN	Septin-8 OS=Bos taurus GN=SEPT8 PE=2 SV=3	5	Carbamyl, Oxidation, Phospho, Glu->pyro-Glu	5.8	51.2	1	139.7 (M:139.7)	5.4	493.12	729
730		true	tr|F1MLS8|F1MLS8_BOVIN	Uncharacterized protein OS=Bos taurus GN=KIAA1217 PE=4 SV=2	5	Carbamyl, Oxidation, Phospho	7.5	199.1	1	139.4 (M:139.4)	3.3	536.79	730
731		true	tr|F1MNM7|F1MNM7_BOVIN	Uncharacterized protein (Fragment) OS=Bos taurus GN=PLIN4 PE=4 SV=2	6	Carbamyl, Oxidation, Phospho	6.3	125.5	1	139.1 (M:139.1)	6.0	235.01	731
732		true	tr|E1BNR9|E1BNR9_BOVIN	Uncharacterized protein OS=Bos taurus GN=SEMA7A PE=4 SV=1	5	Carbamidomethyl, Carbamyl, Oxidation	7.3	75.1	1	139.1 (M:139.1)	5.3	18.95	732
733		true	tr|E1BF27|E1BF27_BOVIN	Uncharacterized protein OS=Bos taurus GN=SLC38A10 PE=4 SV=2	3		5.5	115.6	1	139.1 (M:139.1)	3.6	11.41	733
734		true	tr|F1N5R7|F1N5R7_BOVIN	Uncharacterized protein OS=Bos taurus GN=DNAH7 PE=4 SV=2	2	Carbamyl, Phospho	5.8	461.0	1	139.0 (M:139.0)	0.7	11.70	734
735		true	tr|Q8QMM9|Q8QMM9_COWPX	CPXV219 protein OS=Cowpox virus GN=CPXV219 CDS PE=4 SV=1	3	Carbamyl, Oxidation, Phospho	6.2	215.2	5	138.9 (M:138.9)	1.3	700.36	735
736		true	sp|A4FUA8|CAZA1_BOVIN	F-actin-capping protein subunit alpha-1 OS=Bos taurus GN=CAPZA1 PE=2 SV=1	3		5.5	32.9	1	138.7 (M:138.7)	14.3	9.15	736
737		true	tr|Q2VYC3|Q2VYC3_BOVIN	Eukaryotic translation elongation factor 1 beta 2 OS=Bos taurus PE=3 SV=1	2	Carbamyl, Phospho, Glu->pyro-Glu	4.8	24.2	2	138.6 (M:138.6)	11.4	535.61	737
738		true	tr|E1BMB1|E1BMB1_BOVIN	Uncharacterized protein (Fragment) OS=Bos taurus GN=NIN PE=4 SV=2	3	Carbamidomethyl, Carbamyl, Carboxymethyl, Oxidation	5.1	223.5	3	138.6 (M:138.6)	1.3	14032.66	738
739		true	tr|E1BCR3|E1BCR3_BOVIN	Uncharacterized protein OS=Bos taurus GN=CEP152 PE=4 SV=2	3	Carbamyl, Oxidation, Phospho	5.4	190.9	1	138.4 (M:138.4)	1.7	637.63	739
740		true	sp|Q865V6|CAPG_BOVIN	Macrophage-capping protein OS=Bos taurus GN=CAPG PE=2 SV=1	2	Phospho	6.2	38.9	1	138.4 (M:138.4)	7.4	9.42	740
741		true	tr|E1B800|E1B800_BOVIN	Uncharacterized protein OS=Bos taurus GN=RASAL2 PE=4 SV=2	3	Carbamyl, Oxidation, Phospho	8.4	125.5	1	138.3 (M:138.3)	2.7	754.12	741
742		true	tr|F1MRZ1|F1MRZ1_BOVIN	Uncharacterized protein (Fragment) OS=Bos taurus PE=4 SV=2	1	Carbamidomethyl, Carbamyl, Carboxymethyl, Phospho	8.4	151.0	1	138.2 (M:138.2)	0.7	890.78	742
743		true	tr|F1N406|F1N406_BOVIN	Uncharacterized protein OS=Bos taurus GN=EML6 PE=4 SV=2	3	Gln->pyro-Glu, Carbamyl, Phospho, Glu->pyro-Glu	7.0	217.7	1	138.2 (M:138.2)	1.1	708.20	743
744		true	tr|E1BL95|E1BL95_BOVIN	Uncharacterized protein OS=Bos taurus GN=CENPJ PE=4 SV=1	5	Carbamidomethyl, Carbamyl, Carboxymethyl, Glu->pyro-Glu	6.9	153.7	1	138.2 (M:138.2)	3.3	18118.60	744
745		true	tr|M5FKI8|M5FKI8_BOVIN	Pancreatic adenocarcinoma upregulated factor-like OS=Bos taurus GN=LOC100295702 PE=4 SV=1	3	Carbamyl, Phospho	8.7	17.0	2	137.9 (M:137.9)	20.0	522.73	745
746		true	tr|A5PJT7|A5PJT7_BOVIN	ECM1 protein OS=Bos taurus GN=ECM1 PE=2 SV=1	4	Carbamidomethyl	7.2	57.6	1	137.8 (M:137.8)	8.7	10.19	746
747		true	tr|F1N6E9|F1N6E9_BOVIN	Uncharacterized protein OS=Bos taurus GN=RTF1 PE=4 SV=2	3	Carbamyl, Oxidation, Phospho	8.4	80.7	1	137.8 (M:137.8)	4.2	515.66	747
748		true	sp|Q59HJ6|LONM_BOVIN	Lon protease homolog, mitochondrial OS=Bos taurus GN=LONP1 PE=1 SV=1	2	Carbamidomethyl, Gln->pyro-Glu, Carbamyl, Phospho	6.2	106.6	1	137.6 (M:137.6)	2.4	30.90	748
749		true	tr|F1N3R4|F1N3R4_BOVIN	LETM1 and EF-hand domain-containing protein 1, mitochondrial OS=Bos taurus GN=LETM1 PE=4 SV=1	3	Carbamidomethyl, Carbamyl, Oxidation, Phospho	6.3	81.7	2	137.5 (M:137.5)	2.6	29.90	749
750		true	tr|E1BLQ7|E1BLQ7_BOVIN	Uncharacterized protein OS=Bos taurus GN=ZFAND4 PE=4 SV=2	6	Carbamyl, Phospho	8.5	80.7	1	137.5 (M:137.5)	4.1	490.31	750
751		true	tr|F1N331|F1N331_BOVIN	Uncharacterized protein OS=Bos taurus GN=HMMR PE=4 SV=2	4	Carbamyl, Oxidation, Phospho	5.8	92.3	2	136.9 (M:136.9)	5.1	373.85	751
752		true	tr|A6QPK0|A6QPK0_BOVIN	SCGB2A2 protein OS=Bos taurus GN=SCGB2A2 PE=2 SV=1	3	Carbamidomethyl, Gln->pyro-Glu, Oxidation	5.0	10.4	1	136.8 (M:136.8)	37.0	12.19	752
753		true	tr|E1BE64|E1BE64_BOVIN	Uncharacterized protein (Fragment) OS=Bos taurus GN=TSGA10 PE=4 SV=2	6	Carbamidomethyl, Carbamyl, Carboxymethyl, Oxidation, Phospho, Glu->pyro-Glu	5.5	103.6	1	136.5 (M:136.5)	3.5	659.80	753
754		true	tr|G8JKX6|G8JKX6_BOVIN	Tetraspanin (Fragment) OS=Bos taurus GN=CD9 PE=3 SV=1	3	Carbamidomethyl, Carbamyl	5.4	22.7	2	136.5 (M:136.5)	10.3	539.54	754
755		true	tr|F1MWF1|F1MWF1_BOVIN	Receptor protein-tyrosine kinase OS=Bos taurus GN=KDR PE=3 SV=1	5	Carbamidomethyl, Carbamyl, Phospho	5.6	151.6	2	136.4 (M:136.4)	4.6	281.96	755
756		true	tr|E1BEZ6|E1BEZ6_BOVIN	Uncharacterized protein OS=Bos taurus GN=CXorf57 PE=4 SV=2	5	Carbamidomethyl, Carbamyl, Carboxymethyl, Phospho	9.1	97.9	1	136.3 (M:136.3)	5.0	17131.50	756
757		true	tr|F2Z4C6|F2Z4C6_BOVIN	Eukaryotic translation initiation factor 4 gamma 2 (Fragment) OS=Bos taurus GN=EIF4G2 PE=4 SV=1	4	Carbamidomethyl, Carbamyl, Oxidation, Phospho	6.7	102.3	2	136.1 (M:136.1)	4.5	694.65	757
758		true	tr|E1BCF6|E1BCF6_BOVIN	Uncharacterized protein OS=Bos taurus GN=AFF4 PE=4 SV=1	5	Carbamyl, Phospho	9.4	127.4	1	136.0 (M:136.0)	3.4	855.81	758
759		true	tr|F1MGY6|F1MGY6_BOVIN	Uncharacterized protein (Fragment) OS=Bos taurus GN=TEX15 PE=4 SV=2	6	Carbamidomethyl, Carbamyl, Carboxymethyl, Phospho	5.8	310.2	1	135.9 (M:135.9)	2.0	651.94	759
760		true	tr|Q2KJJ7|Q2KJJ7_BOVIN	Serine peptidase inhibitor, Kunitz type 1 OS=Bos taurus GN=SPINT1 PE=2 SV=1	6	Carbamidomethyl, Carbamyl, Phospho, Glu->pyro-Glu	5.8	57.3	1	135.9 (M:135.9)	11.9	14.98	760
761		true	sp|A6QNM8|SYTC2_BOVIN	Probable threonine--tRNA ligase 2, cytoplasmic OS=Bos taurus GN=TARSL2 PE=2 SV=1	1	Carbamyl, Phospho, Glu->pyro-Glu	5.8	83.0	1	135.8 (M:135.8)	1.4	10.85	761
762		true	tr|F1N746|F1N746_BOVIN	Uncharacterized protein OS=Bos taurus GN=RABGAP1 PE=4 SV=2	4	Gln->pyro-Glu, Carbamyl, Oxidation, Phospho	5.2	120.9	2	135.8 (M:135.8)	2.8	549.02	762
763		true	tr|F1MTZ4|F1MTZ4_BOVIN	Uncharacterized protein (Fragment) OS=Bos taurus GN=FBN2 PE=4 SV=2	1	Carbamidomethyl, Carbamyl, Carboxymethyl, Oxidation, Phospho	5.1	403.0	1	135.3 (M:135.3)	0.5	20.19	763
764		true	tr|Q3MHZ3|Q3MHZ3_BOVIN	ATP6AP1 protein (Fragment) OS=Bos taurus GN=ATP6AP1 PE=2 SV=1	4		5.0	51.5	1	135.2 (M:135.2)	11.8	10.98	764
765		true	tr|E1BP16|E1BP16_BOVIN	Uncharacterized protein OS=Bos taurus GN=SRRM1 PE=4 SV=2	5	Gln->pyro-Glu, Carbamyl, Phospho	11.8	101.8	1	134.9 (M:134.9)	5.0	681.64	765
766		true	tr|F1N542|F1N542_BOVIN	Uncharacterized protein (Fragment) OS=Bos taurus GN=KDM7A PE=4 SV=1	4	Carbamidomethyl, Carbamyl, Carboxymethyl, Oxidation	8.2	100.0	1	134.9 (M:134.9)	3.9	29136.32	766
767		true	tr|G1EUN8|G1EUN8_BHV4	V-FGAM-synthase OS=Bovine herpesvirus 4 GN=ORF 3 PE=4 SV=1	2	Carbamidomethyl, Carbamyl, Carboxymethyl, Phospho	6.9	142.4	2	134.9 (M:134.9)	1.5	482.80	767
768		true	tr|Q2HJI6|Q2HJI6_BOVIN	Granulin OS=Bos taurus GN=GRN PE=2 SV=1	3	Carbamidomethyl, Gln->pyro-Glu	7.8	63.0	2	134.7 (M:134.7)	8.3	11.24	768
769		true	sp|F1MHT9|NLRC4_BOVIN	NLR family CARD domain-containing protein 4 OS=Bos taurus GN=NLRC4 PE=3 SV=3	3	Carbamyl, Oxidation, Phospho	6.0	115.5	2	134.7 (M:134.7)	3.4	723.49	769
770		true	tr|F1MPE2|F1MPE2_BOVIN	Uncharacterized protein OS=Bos taurus GN=DOPEY1 PE=4 SV=1	6	Carbamidomethyl, Carbamyl, Carboxymethyl, Oxidation, Phospho	5.8	276.2	2	134.6 (M:134.6)	1.7	15203.80	770
771		true	sp|Q06997|VP2_BTV1V	Outer capsid protein VP2 OS=Bluetongue virus 1 (isolate South Africa vaccine) GN=S2 PE=3 SV=1	2	Carbamidomethyl, Gln->pyro-Glu, Carbamyl, Carboxymethyl, Oxidation, Phospho	6.6	111.7	1	134.6 (M:134.6)	2.7	34.51	771
772		true	tr|G3MX46|G3MX46_BOVIN	Uncharacterized protein OS=Bos taurus GN=CIC PE=4 SV=1	4	Carbamidomethyl, Gln->pyro-Glu, Carbamyl, Carboxymethyl, Phospho	8.3	256.8	2	134.4 (M:134.4)	1.8	693.64	772
773		true	sp|P40682|VAS1_BOVIN	V-type proton ATPase subunit S1 OS=Bos taurus GN=ATP6AP1 PE=1 SV=1	4	Carbamyl, Oxidation, Phospho	5.0	51.7	1	134.4 (M:134.4)	11.8	10.98	773
774		true	tr|F1MMV0|F1MMV0_BOVIN	Uncharacterized protein OS=Bos taurus GN=IBTK PE=4 SV=2	3	Carbamidomethyl, Carbamyl, Oxidation, Phospho	8.2	150.0	1	134.2 (M:134.2)	1.3	78.22	774
775		true	tr|E1BP17|E1BP17_BOVIN	Serine/threonine-protein kinase PLK OS=Bos taurus GN=PLK2 PE=3 SV=1	5	Carbamyl, Phospho, Glu->pyro-Glu	8.5	78.2	1	134.0 (M:134.0)	4.5	577.45	775
776		true	tr|Q8JTV3|Q8JTV3_LSDV	Putative virion core protein OS=Lumpy skin disease virus GN=LW048 PE=4 SV=1	5	Carbamyl, Phospho	8.5	50.7	9	133.9 (M:133.9)	4.4	586.73	776
777		true	tr|F1MLH7|F1MLH7_BOVIN	Uncharacterized protein OS=Bos taurus GN=RNF214 PE=4 SV=2	2	Carbamyl, Oxidation, Phospho	6.5	77.6	2	133.8 (M:133.8)	3.5	598.94	777
778		true	tr|E1BFX5|E1BFX5_BOVIN	Uncharacterized protein OS=Bos taurus GN=ITGAE PE=3 SV=1	4	Carbamyl, Oxidation, Phospho	6.0	129.5	1	133.8 (M:133.8)	2.6	230.11	778
779		true	tr|F1N2W4|F1N2W4_BOVIN	Uncharacterized protein (Fragment) OS=Bos taurus GN=ASXL2 PE=4 SV=1	3	Carbamidomethyl, Carbamyl, Carboxymethyl, Oxidation, Phospho	8.9	149.7	1	133.6 (M:133.6)	3.2	12426.39	779
780		true	tr|E1BBX5|E1BBX5_BOVIN	Uncharacterized protein OS=Bos taurus GN=AOX3L1 PE=4 SV=2	5	Carbamidomethyl, Carbamyl, Oxidation, Phospho, Glu->pyro-Glu	6.1	148.7	2	133.5 (M:133.5)	2.2	540.53	780
781		true	tr|F1MKS3|F1MKS3_BOVIN	Uncharacterized protein (Fragment) OS=Bos taurus GN=TXNDC5 PE=1 SV=2	3	Carbamidomethyl	5.0	28.7	1	133.4 (M:133.4)	14.0	10.06	781
782		true	tr|E1BLK1|E1BLK1_BOVIN	Uncharacterized protein OS=Bos taurus GN=TNRC18 PE=4 SV=2	3	Carbamyl, Oxidation, Phospho	8.9	305.0	1	133.2 (M:133.2)	0.6	1559.25	782
783		true	tr|E1BN24|E1BN24_BOVIN	Uncharacterized protein OS=Bos taurus GN=ZNFX1 PE=4 SV=1	2	Carbamyl, Oxidation, Phospho	7.9	219.9	1	133.2 (M:133.2)	1.3	707.63	783
784		true	sp|Q17QE5|CIB1_BOVIN	Calcium and integrin-binding protein 1 OS=Bos taurus GN=CIB1 PE=2 SV=1	4	Carbamyl, Oxidation, Phospho	4.6	21.7	1	133.1 (M:133.1)	20.4	426.64	784
785		true	tr|E1BKE1|E1BKE1_BOVIN	Uncharacterized protein OS=Bos taurus GN=FRYL PE=4 SV=2	6	Carbamidomethyl, Carbamyl, Carboxymethyl, Phospho	5.4	339.6	1	133.1 (M:133.1)	2.3	488.27	785
786		true	tr|F1MMU9|F1MMU9_BOVIN	Sodium channel protein OS=Bos taurus GN=SCN8A PE=3 SV=2	4	Carbamidomethyl, Carbamyl, Carboxymethyl, Phospho	5.9	225.2	1	133.0 (M:133.0)	2.3	17416.16	786
787		true	tr|F1MFD2|F1MFD2_BOVIN	Uncharacterized protein OS=Bos taurus GN=KMT2E PE=4 SV=2	4	Carbamidomethyl, Carbamyl, Carboxymethyl, Phospho	7.3	204.5	1	133.0 (M:133.0)	2.2	11962.13	787
788		true	tr|F1MPF7|F1MPF7_BOVIN	Uncharacterized protein (Fragment) OS=Bos taurus GN=PHIP PE=4 SV=1	5	Carbamyl, Oxidation, Phospho	9.1	199.6	1	133.0 (M:133.0)	3.2	634.20	788
789		true	tr|Q08DN1|Q08DN1_BOVIN	Tumor necrosis factor receptor superfamily, member 21 OS=Bos taurus GN=TNFRSF21 PE=2 SV=1	3	Carbamidomethyl, Carbamyl	7.9	71.3	1	132.8 (M:132.8)	5.8	10.46	789
790		true	tr|A0A0F6N5A4|A0A0F6N5A4_BHV4	V-FGAM-synthase OS=Bovine herpesvirus 4 PE=4 SV=1	2	Carbamidomethyl, Carbamyl, Carboxymethyl, Oxidation, Phospho	7.4	142.6	1	132.8 (M:132.8)	2.6	342.23	790
791		true	tr|E1BAM1|E1BAM1_BOVIN	Uncharacterized protein OS=Bos taurus GN=ANKRD35 PE=4 SV=1	3	Carbamidomethyl, Carbamyl, Carboxymethyl, Glu->pyro-Glu	5.6	110.1	1	132.5 (M:132.5)	3.7	23879.29	791
792		true	tr|G5E630|G5E630_BOVIN	USP9X OS=Bos taurus GN=USP9X PE=3 SV=1	4	Carbamidomethyl, Carbamyl, Carboxymethyl, Oxidation, Phospho	5.5	290.1	1	132.1 (M:132.1)	1.6	24793.74	792
793		true	tr|E1BCH1|E1BCH1_BOVIN	Uncharacterized protein OS=Bos taurus GN=MAPKBP1 PE=4 SV=2	3	Carbamyl, Oxidation, Phospho, Glu->pyro-Glu	6.4	162.3	1	132.0 (M:132.0)	2.3	589.76	793
794		true	tr|F1MY77|F1MY77_BOVIN	Uncharacterized protein OS=Bos taurus GN=ZMYND8 PE=4 SV=2	5	Carbamidomethyl, Carbamyl, Carboxymethyl, Oxidation, Phospho	6.3	131.3	1	132.0 (M:132.0)	4.5	15144.02	794
795		true	tr|E1BKL9|E1BKL9_BOVIN	Uncharacterized protein OS=Bos taurus GN=FAT1 PE=4 SV=2	3	Carbamyl, Oxidation, Phospho, Glu->pyro-Glu	4.9	505.6	1	131.9 (M:131.9)	0.7	655.32	795
796		true	tr|Q9BG87|Q9BG87_BOVIN	Uveal autoantigen OS=Bos taurus PE=2 SV=1	6	Carbamyl, Phospho, Glu->pyro-Glu	6.7	165.8	1	131.7 (M:131.7)	3.5	722.13	796
797		true	tr|Q3ZC87|Q3ZC87_BOVIN	Pyruvate kinase (Fragment) OS=Bos taurus GN=PKM2 PE=2 SV=1	6	Carbamidomethyl, Carbamyl, Phospho	8.6	61.4	3	131.6 (M:131.6)	12.2	537.30	797
798		true	tr|E1BC96|E1BC96_BOVIN	Uncharacterized protein OS=Bos taurus GN=ZC3H18 PE=4 SV=2	5	Carbamyl, Phospho, Glu->pyro-Glu	8.9	104.7	2	131.5 (M:131.5)	5.1	814.17	798
799		true	tr|F1MI34|F1MI34_BOVIN	Uncharacterized protein (Fragment) OS=Bos taurus GN=CCDC108 PE=4 SV=2	5	Carbamidomethyl, Carbamyl, Oxidation, Phospho	6.2	206.0	1	131.3 (M:131.3)	2.6	309.14	799
800		true	tr|F1MQ85|F1MQ85_BOVIN	Uncharacterized protein OS=Bos taurus GN=ATRX PE=4 SV=2	5	Carbamidomethyl, Gln->pyro-Glu, Carbamyl, Carboxymethyl, Oxidation, Phospho	6.1	280.8	1	131.2 (M:131.2)	2.0	12148.77	800
801		true	tr|F1MBF6|F1MBF6_BOVIN	Uncharacterized protein OS=Bos taurus GN=RAB6A PE=3 SV=2	3	Carbamyl, Oxidation	5.4	23.5	2	130.7 (M:130.7)	19.2	329.93	801
802		true	tr|E1BAT8|E1BAT8_BOVIN	Kinesin-like protein OS=Bos taurus GN=KIF20B PE=3 SV=1	6	Carbamidomethyl, Carbamyl, Carboxymethyl, Phospho	5.5	207.2	4	130.6 (M:130.6)	3.0	60.47	802
803		true	tr|G3X6R3|G3X6R3_BOVIN	Uncharacterized protein OS=Bos taurus GN=STAG2 PE=4 SV=1	4	Carbamidomethyl, Carbamyl, Oxidation, Phospho	5.4	146.0	1	130.4 (M:130.4)	4.0	566.19	803
804		true	sp|Q3MHL4|SAHH_BOVIN	Adenosylhomocysteinase OS=Bos taurus GN=AHCY PE=2 SV=3	3	Carbamyl, Phospho	5.9	47.6	1	130.2 (M:130.2)	7.4	9.98	804
805		true	tr|E1BMN5|E1BMN5_BOVIN	Uncharacterized protein OS=Bos taurus GN=SPTBN2 PE=4 SV=2	5	Carbamidomethyl, Carbamyl, Carboxymethyl, Oxidation, Phospho, Glu->pyro-Glu	6.2	271.9	1	130.2 (M:130.2)	2.5	18556.28	805
806		true	tr|F1MI60|F1MI60_BOVIN	Uncharacterized protein (Fragment) OS=Bos taurus GN=MAP4K4 PE=4 SV=2	5	Carbamidomethyl, Carbamyl, Carboxymethyl, Oxidation, Phospho	8.8	140.5	2	130.1 (M:130.1)	6.2	13504.04	806
807		true	sp|P02253|H12_BOVIN	Histone H1.2 OS=Bos taurus GN=HIST1H1C PE=1 SV=2	5	Carbamyl, Phospho	11.0	21.3	3	130.0 (M:130.0)	16.9	411.37	807
808		true	sp|A6QQJ3|PERI_BOVIN	Peripherin OS=Bos taurus GN=PRPH PE=2 SV=1	5	Carbamyl, Oxidation, Phospho	5.3	53.6	1	129.9 (M:129.9)	10.4	774.43	808
809		true	sp|P13135|CPNS1_BOVIN	Calpain small subunit 1 OS=Bos taurus GN=CAPNS1 PE=2 SV=1	4	Carbamidomethyl, Carboxymethyl, Oxidation, Phospho	5.1	27.9	1	129.9 (M:129.9)	21.3	493.67	809
810		true	tr|A7MBK3|A7MBK3_BOVIN	INPP5D protein OS=Bos taurus GN=INPP5D PE=2 SV=1	3	Carbamyl, Oxidation, Phospho	8.0	133.5	2	129.8 (M:129.8)	3.1	316.17	810
811		true	tr|E1BAR2|E1BAR2_BOVIN	Uncharacterized protein OS=Bos taurus GN=ZCCHC6 PE=4 SV=2	3	Carbamidomethyl, Carbamyl, Oxidation, Phospho, Glu->pyro-Glu	6.8	171.2	1	129.6 (M:129.6)	1.9	750.45	811
812		true	tr|A2SZU8|A2SZU8_RVFV	Polymerase OS=Rift valley fever virus PE=4 SV=1	3	Carbamidomethyl, Carbamyl, Carboxymethyl, Oxidation, Phospho	6.3	237.8	48	129.6 (M:129.6)	1.5	668.06	812
813		true	tr|E1BCZ9|E1BCZ9_BOVIN	Uncharacterized protein OS=Bos taurus GN=ADNP PE=4 SV=1	5	Carbamidomethyl, Carbamyl, Carboxymethyl, Phospho	7.0	123.4	1	129.4 (M:129.4)	2.5	16777.82	813
814		true	tr|E1B805|E1B805_BOVIN	Uncharacterized protein (Fragment) OS=Bos taurus GN=LOC528040 PE=4 SV=2	3	Carbamidomethyl, Carbamyl, Carboxymethyl, Phospho	6.5	187.1	1	129.4 (M:129.4)	2.0	24778.29	814
815		true	tr|E1B8H0|E1B8H0_BOVIN	Uncharacterized protein OS=Bos taurus GN=PEAK1 PE=4 SV=2	5	Carbamidomethyl, Carbamyl, Carboxymethyl, Oxidation, Phospho	6.5	192.4	1	129.1 (M:129.1)	5.2	13459.29	815
816		true	tr|G3MZD1|G3MZD1_BOVIN	Uncharacterized protein (Fragment) OS=Bos taurus GN=ZNF629 PE=4 SV=1	3	Carbamidomethyl, Carbamyl, Carboxymethyl, Phospho	9.1	57.3	46	129.0 (M:129.0)	3.8	29909.38	816
817		true	sp|G3MWR8|MICA3_BOVIN	Protein-methionine sulfoxide oxidase MICAL3 OS=Bos taurus GN=MICAL3 PE=3 SV=1	4	Carbamyl, Oxidation, Phospho, Glu->pyro-Glu	5.5	217.4	1	128.9 (M:128.9)	1.9	498.40	817
818		true	tr|Q1RMP3|Q1RMP3_BOVIN	CutA divalent cation tolerance homolog (E. coli) OS=Bos taurus GN=CUTA PE=2 SV=1	3		5.4	16.3	4	128.8 (M:128.8)	26.1	10.86	818
819		true	tr|E1B9V6|E1B9V6_BOVIN	Uncharacterized protein OS=Bos taurus GN=ZFYVE20 PE=4 SV=1	3	Carbamidomethyl, Carbamyl, Carboxymethyl, Oxidation, Phospho	5.4	88.6	1	128.7 (M:128.7)	2.3	686.38	819
820		true	tr|F1N4W9|F1N4W9_BOVIN	Sodium channel protein (Fragment) OS=Bos taurus GN=SCN7A PE=3 SV=2	4	Carbamidomethyl, Carbamyl, Carboxymethyl, Oxidation, Phospho	7.6	196.6	1	128.7 (M:128.7)	2.1	33453.51	820
821		true	tr|F1MXP9|F1MXP9_BOVIN	Uncharacterized protein OS=Bos taurus GN=CDH23 PE=4 SV=2	4	Carbamyl, Phospho, Glu->pyro-Glu	4.5	369.0	1	128.6 (M:128.6)	1.1	618.44	821
822		true	sp|P16379|L_VSNJO	RNA-directed RNA polymerase L OS=Vesicular stomatitis New Jersey virus (strain Ogden subtype Concan) GN=L PE=2 SV=2	2	Carbamidomethyl, Carbamyl, Oxidation, Phospho	8.7	241.5	2	128.5 (M:128.5)	2.2	258.29	822
823		true	tr|G5E5N8|G5E5N8_BOVIN	Uncharacterized protein (Fragment) OS=Bos taurus GN=KIAA1377 PE=4 SV=1	2	Carbamidomethyl, Carbamyl, Carboxymethyl, Phospho	9.3	117.7	1	128.5 (M:128.5)	2.4	17584.55	823
824		true	tr|E1BF96|E1BF96_BOVIN	Uncharacterized protein OS=Bos taurus GN=PPP1R10 PE=4 SV=2	4	Carbamyl, Oxidation, Phospho	9.2	97.5	1	128.3 (M:128.3)	3.9	489.88	824
825		true	tr|F1MBK6|F1MBK6_BOVIN	Uncharacterized protein (Fragment) OS=Bos taurus GN=HIVEP3 PE=4 SV=2	6	Carbamyl, Oxidation, Phospho, Glu->pyro-Glu	8.9	230.5	1	128.2 (M:128.2)	3.1	380.75	825
826		true	tr|A0A097ZMQ9|A0A097ZMQ9_PI3B	RNA-directed RNA polymerase L OS=Bovine parainfluenza 3 virus PE=3 SV=1	6	Carbamyl, Oxidation, Phospho	6.1	256.4	1	128.1 (M:128.1)	3.1	233.79	826
827		true	sp|Q08DI1|ETAA1_BOVIN	Ewing's tumor-associated antigen 1 homolog OS=Bos taurus GN=ETAA1 PE=2 SV=1	6	Carbamidomethyl, Carbamyl, Carboxymethyl, Phospho	8.8	99.8	1	128.1 (M:128.1)	9.9	797.97	827
828		true	tr|E1BNX1|E1BNX1_BOVIN	Uncharacterized protein OS=Bos taurus GN=RAB3D PE=3 SV=1	2		4.8	24.4	1	127.9 (M:127.9)	10.5	10.94	828
829		true	tr|E1B8L0|E1B8L0_BOVIN	Uncharacterized protein OS=Bos taurus GN=ABCC9 PE=3 SV=2	2	Carbamidomethyl, Carbamyl, Oxidation, Phospho	6.7	174.7	1	127.9 (M:127.9)	1.6	755.86	829
830		true	sp|Q3SZN0|SEPT6_BOVIN	Septin-6 OS=Bos taurus GN=SEPT6 PE=2 SV=1	5	Carbamyl, Oxidation, Phospho	6.4	48.7	2	127.8 (M:127.8)	5.9	492.97	830
831		true	sp|Q9E784|L_BEFVB	RNA-directed RNA polymerase L OS=Bovine ephemeral fever virus (strain BB7721) GN=L PE=3 SV=1	2	Carbamyl, Phospho	8.4	249.6	2	127.6 (M:127.6)	0.3	1070.51	831
832		true	sp|Q0VCW4|SDHL_BOVIN	L-serine dehydratase/L-threonine deaminase OS=Bos taurus GN=SDS PE=2 SV=1	4	Carbamidomethyl, Carbamyl, Oxidation, Phospho	7.0	34.4	2	127.6 (M:127.6)	20.8	276.75	832
833		true	tr|F1N4U5|F1N4U5_BOVIN	Uncharacterized protein OS=Bos taurus GN=GPATCH3 PE=4 SV=1	4	Carbamidomethyl, Gln->pyro-Glu, Carbamyl, Carboxymethyl, Oxidation, Phospho	4.9	58.5	2	127.5 (M:127.5)	9.9	15440.36	833
834		true	tr|E1B7C4|E1B7C4_BOVIN	Uncharacterized protein OS=Bos taurus GN=DOCK10 PE=4 SV=2	3	Carbamidomethyl, Carbamyl, Oxidation, Phospho	6.3	247.9	1	126.9 (M:126.9)	1.2	68.27	834
835		true	sp|Q2KJA1|SH3G1_BOVIN	Endophilin-A2 OS=Bos taurus GN=SH3GL1 PE=2 SV=1	5	Carbamidomethyl, Gln->pyro-Glu, Carbamyl, Carboxymethyl, Oxidation, Phospho	5.4	41.4	1	126.8 (M:126.8)	11.7	13292.31	835
836		true	tr|Q2T9M8|Q2T9M8_BOVIN	Synaptosomal-associated protein OS=Bos taurus GN=SNAP23 PE=2 SV=1	4	Carbamyl	4.7	23.2	1	126.8 (M:126.8)	28.9	261.35	836
837		true	sp|P12434|VP2_BTV1A	Outer capsid protein VP2 OS=Bluetongue virus 1 (isolate Australia) GN=S2 PE=3 SV=2	5	Carbamyl, Oxidation, Phospho	7.4	112.0	1	126.7 (M:126.7)	4.4	948.91	837
838		true	tr|Q4VS17|Q4VS17_BOVIN	FGFBP (Fragment) OS=Bos taurus PE=4 SV=1	3	Carbamidomethyl	9.2	11.9	2	126.6 (M:126.6)	41.1	12.70	838
839		true	tr|F1MLR9|F1MLR9_BOVIN	Uncharacterized protein (Fragment) OS=Bos taurus GN=MYO7B PE=4 SV=2	2	Carbamidomethyl, Carbamyl, Oxidation, Phospho	8.9	247.7	1	126.6 (M:126.6)	0.6	35.96	839
840		true	tr|G3N3M6|G3N3M6_BOVIN	Uncharacterized protein OS=Bos taurus GN=CEP250 PE=4 SV=1	2	Carbamyl, Glu->pyro-Glu	5.1	278.2	2	126.6 (M:126.6)	1.0	35.24	840
841		true	tr|Q3ZBY5|Q3ZBY5_BOVIN	Uncharacterized protein OS=Bos taurus GN=ZSCAN21 PE=2 SV=1	5	Carbamidomethyl, Carbamyl, Carboxymethyl, Oxidation, Phospho	8.0	53.3	1	126.4 (M:126.4)	10.9	13145.38	841
842		true	tr|F1MFA7|F1MFA7_BOVIN	Uncharacterized protein (Fragment) OS=Bos taurus GN=CCDC186 PE=4 SV=2	1	Carbamidomethyl, Carbamyl, Phospho, Glu->pyro-Glu	6.1	105.8	1	126.4 (M:126.4)	0.8	18.27	842
843		true	tr|F1MQ65|F1MQ65_BOVIN	Uncharacterized protein OS=Bos taurus GN=MYO1E PE=4 SV=2	4	Carbamidomethyl, Carbamyl, Carboxymethyl, Oxidation, Phospho, Glu->pyro-Glu	9.1	126.9	1	126.3 (M:126.3)	4.4	16010.37	843
844		true	tr|E1BI42|E1BI42_BOVIN	Uncharacterized protein OS=Bos taurus GN=CCDC158 PE=4 SV=2	4	Carbamyl, Phospho	6.2	127.1	1	126.3 (M:126.3)	4.0	316.26	844
845		true	tr|Q17QL4|Q17QL4_BOVIN	Melanoma antigen family D, 2 OS=Bos taurus GN=MAGED2 PE=2 SV=1	2	Carbamyl, Oxidation, Phospho	9.4	63.2	1	126.3 (M:126.3)	3.4	822.20	845
846		true	tr|F1MRW6|F1MRW6_BOVIN	Uncharacterized protein (Fragment) OS=Bos taurus GN=PLEKHM2 PE=4 SV=2	2	Carbamyl, Phospho	4.9	111.3	1	126.2 (M:126.2)	0.8	21.53	846
847		true	sp|Q3ZBV8|SYTC_BOVIN	Threonine--tRNA ligase, cytoplasmic OS=Bos taurus GN=TARS PE=2 SV=1	4		6.3	83.4	1	126.1 (M:126.1)	5.9	9.75	847
848		true	tr|A7MB50|A7MB50_BOVIN	TBCD protein OS=Bos taurus GN=TBCD PE=2 SV=1	3	Carbamidomethyl, Carbamyl, Oxidation, Phospho	6.1	129.9	2	125.9 (M:125.9)	2.2	700.56	848
849		true	sp|Q2KIG3|CBPB2_BOVIN	Carboxypeptidase B2 OS=Bos taurus GN=CPB2 PE=1 SV=1	2	Carbamidomethyl	8.8	48.8	1	125.8 (M:125.8)	9.2	10.53	849
850		true	tr|F1MPL6|F1MPL6_BOVIN	Uncharacterized protein OS=Bos taurus PE=3 SV=2	3	Phospho	5.8	40.4	1	125.8 (M:125.8)	12.5	16.45	850
851		true	tr|Q862D4|Q862D4_BOVIN	Similar to lactate dehydrogenase B (Fragment) OS=Bos taurus PE=2 SV=1	2	Carbamyl, Phospho	5.1	13.7	1	125.8 (M:125.8)	15.3	54.62	851
852		true	tr|E1BG18|E1BG18_BOVIN	Uncharacterized protein OS=Bos taurus GN=ZNF518A PE=4 SV=2	4	Carbamyl, Phospho	9.3	166.3	1	125.7 (M:125.7)	2.5	906.32	852
853		true	sp|Q8WN95|ITPR3_BOVIN	Inositol 1,4,5-trisphosphate receptor type 3 OS=Bos taurus GN=ITPR3 PE=2 SV=1	4	Carbamidomethyl, Carbamyl, Carboxymethyl, Oxidation, Phospho, Glu->pyro-Glu	6.1	302.8	2	125.5 (M:125.5)	1.5	15544.86	853
854		true	tr|G3X6W2|G3X6W2_BOVIN	Uncharacterized protein OS=Bos taurus GN=LOC101909711 PE=4 SV=1	3	Carbamyl, Oxidation, Phospho	6.6	153.6	1	125.4 (M:125.4)	1.7	367.60	854
855		true	tr|G3X6S6|G3X6S6_BOVIN	Uncharacterized protein (Fragment) OS=Bos taurus GN=NHS PE=4 SV=1	2	Carbamyl, Oxidation, Phospho	6.2	147.7	2	125.4 (M:125.4)	1.4	902.61	855
856		true	tr|F1MJR2|F1MJR2_BOVIN	Uncharacterized protein (Fragment) OS=Bos taurus GN=PTPRD PE=4 SV=1	2	Carbamyl, Phospho, Glu->pyro-Glu	6.1	199.2	1	125.4 (M:125.4)	0.9	1043.32	856
857		true	tr|F1MF87|F1MF87_BOVIN	Uncharacterized protein (Fragment) OS=Bos taurus GN=TTC28 PE=4 SV=2	3	Carbamyl, Oxidation, Phospho	6.5	255.5	1	125.1 (M:125.1)	2.0	519.87	857
858		true	tr|F1MF64|F1MF64_BOVIN	Uncharacterized protein (Fragment) OS=Bos taurus GN=NBEA PE=4 SV=2	2	Carbamyl, Oxidation, Phospho	5.8	314.5	1	125.1 (M:125.1)	0.6	971.67	858
859		true	tr|Q08DU2|Q08DU2_BOVIN	MIPOL1 protein (Fragment) OS=Bos taurus GN=MIPOL1 PE=2 SV=1	3	Carbamidomethyl, Carbamyl, Oxidation, Glu->pyro-Glu	5.9	51.2	2	125.0 (M:125.0)	6.2	491.77	859
860		true	tr|F1MZT7|F1MZT7_BOVIN	Uncharacterized protein (Fragment) OS=Bos taurus GN=GCN1L1 PE=4 SV=1	4	Carbamidomethyl, Carbamyl, Carboxymethyl, Oxidation, Phospho	7.0	292.9	2	125.0 (M:125.0)	2.1	15698.55	860
861		true	sp|P09487|PPBT_BOVIN	Alkaline phosphatase, tissue-nonspecific isozyme OS=Bos taurus GN=ALPL PE=1 SV=2	5		6.3	57.2	1	125.0 (M:125.0)	11.6	10.96	861
862		true	tr|F1MGS1|F1MGS1_BOVIN	Uncharacterized protein OS=Bos taurus GN=RFX1 PE=4 SV=2	3	Carbamyl, Oxidation, Phospho	8.6	104.4	1	124.7 (M:124.7)	3.4	432.05	862
863		true	tr|Q3MHJ4|Q3MHJ4_BOVIN	Multiple coagulation factor deficiency 2 OS=Bos taurus GN=MCFD2 PE=2 SV=1	3	Phospho	4.3	10.6	3	124.7 (M:124.7)	18.3	8.50	863
864		true	tr|A7E3D9|A7E3D9_BOVIN	ACSL4 protein (Fragment) OS=Bos taurus GN=ACSL4 PE=2 SV=1	5	Carbamidomethyl, Carbamyl, Carboxymethyl, Oxidation, Phospho, Glu->pyro-Glu	8.5	72.6	2	124.5 (M:124.5)	10.5	10015.83	864
865		true	tr|E1BM47|E1BM47_BOVIN	Uncharacterized protein OS=Bos taurus GN=MROH2B PE=4 SV=1	3	Carbamyl, Oxidation, Phospho, Glu->pyro-Glu	6.1	180.9	1	124.3 (M:124.3)	2.1	53.45	865
866		true	tr|G3X778|G3X778_BOVIN	Uncharacterized protein OS=Bos taurus GN=PHKA1 PE=4 SV=1	4	Carbamyl, Oxidation, Phospho, Glu->pyro-Glu	5.9	139.0	1	124.3 (M:124.3)	2.6	40.81	866
867		true	tr|A3KLR9|A3KLR9_BOVIN	Extracellular superoxide dismutase OS=Bos taurus GN=ECSOD PE=2 SV=1	3		6.6	26.2	1	124.3 (M:124.3)	13.3	9.80	867
868		true	tr|G3MZM9|G3MZM9_BOVIN	Uncharacterized protein OS=Bos taurus GN=CXHXorf66 PE=4 SV=1	5	Carbamyl, Phospho	9.8	40.7	3	124.2 (M:124.2)	8.3	737.31	868
869		true	tr|E1BFB4|E1BFB4_BOVIN	Uncharacterized protein OS=Bos taurus GN=MTOR PE=4 SV=2	3	Carbamidomethyl, Carbamyl, Carboxymethyl, Oxidation, Phospho	6.7	288.9	1	124.2 (M:124.2)	1.5	440.21	869
870		true	tr|F1MRA1|F1MRA1_BOVIN	Uncharacterized protein (Fragment) OS=Bos taurus PE=4 SV=2	4	Carbamidomethyl, Carbamyl, Phospho	9.1	93.4	2	124.2 (M:124.2)	4.5	48.27	870
871		true	tr|E1BLA8|E1BLA8_BOVIN	Uncharacterized protein OS=Bos taurus GN=GOLM1 PE=4 SV=1	3	Carbamidomethyl, Carbamyl	4.8	45.5	1	124.1 (M:124.1)	8.9	554.52	871
872		true	tr|G3N3S3|G3N3S3_BOVIN	Uncharacterized protein OS=Bos taurus PE=3 SV=1	3	Carbamidomethyl, Carbamyl, Carboxymethyl, Oxidation	10.0	14.8	6	124.0 (M:124.0)	16.2	26522.01	872
873		true	tr|F1MT13|F1MT13_BOVIN	Uncharacterized protein (Fragment) OS=Bos taurus GN=PDZD2 PE=4 SV=2	5	Carbamyl, Oxidation, Phospho, Glu->pyro-Glu	7.1	278.0	1	124.0 (M:124.0)	1.9	788.21	873
874		true	tr|E1BJE1|E1BJE1_BOVIN	Uncharacterized protein OS=Bos taurus GN=DENND4A PE=4 SV=2	3	Carbamidomethyl, Carbamyl, Carboxymethyl, Oxidation, Phospho	7.0	209.9	1	123.9 (M:123.9)	1.6	1044.24	874
875		true	tr|F1MJ10|F1MJ10_BOVIN	Uncharacterized protein OS=Bos taurus GN=NEDD4 PE=4 SV=2	3	Carbamidomethyl, Carbamyl, Oxidation, Phospho, Glu->pyro-Glu	6.2	148.5	1	123.8 (M:123.8)	2.3	666.26	875
876		true	sp|Q9BE40|MYH1_BOVIN	Myosin-1 OS=Bos taurus GN=MYH1 PE=2 SV=2	3	Carbamidomethyl, Carbamyl, Carboxymethyl, Phospho, Glu->pyro-Glu	5.6	222.9	3	123.8 (M:123.8)	2.1	799.43	876
877		true	tr|F1MTS7|F1MTS7_BOVIN	Cyclic nucleotide-gated cation channel beta-1 OS=Bos taurus GN=CNGB1 PE=4 SV=1	3	Carbamyl, Phospho, Glu->pyro-Glu	4.5	154.0	16	123.8 (M:123.8)	1.5	801.60	877
878		true	tr|G3X7S2|G3X7S2_BOVIN	Heat shock protein beta-1 OS=Bos taurus GN=HSPB1 PE=3 SV=1	3		6.5	17.4	4	123.7 (M:123.7)	22.1	8.87	878
879		true	tr|G3X7I5|G3X7I5_BOVIN	Uncharacterized protein (Fragment) OS=Bos taurus PE=4 SV=1	3	Carbamidomethyl, Gln->pyro-Glu, Phospho	7.9	11.3	2	123.7 (M:123.7)	43.1	11.03	879
880		true	tr|G3MYP5|G3MYP5_BOVIN	Uncharacterized protein OS=Bos taurus GN=MAP1A PE=4 SV=1	3	Carbamidomethyl, Carbamyl, Phospho	4.8	303.1	2	123.6 (M:123.6)	1.8	489.93	880
881		true	tr|E1BML2|E1BML2_BOVIN	Microtubule-associated tumor suppressor 1 homolog OS=Bos taurus GN=MTUS1 PE=4 SV=2	5	Carbamidomethyl, Carbamyl, Carboxymethyl, Phospho	8.1	143.8	2	123.5 (M:123.5)	4.9	15261.61	881
882		true	tr|E1BNL3|E1BNL3_BOVIN	Uncharacterized protein (Fragment) OS=Bos taurus GN=ZAN PE=4 SV=2	5	Carbamidomethyl, Carbamyl, Carboxymethyl, Phospho	6.9	272.2	1	123.4 (M:123.4)	1.9	28633.26	882
883		true	tr|F1N787|F1N787_BOVIN	Uncharacterized protein (Fragment) OS=Bos taurus GN=REV1 PE=4 SV=2	4	Carbamidomethyl, Carbamyl, Oxidation, Phospho	8.9	131.5	1	123.4 (M:123.4)	4.1	657.12	883
884		true	tr|E1BJW3|E1BJW3_BOVIN	Uncharacterized protein OS=Bos taurus GN=MMRN2 PE=4 SV=1	3	Gln->pyro-Glu, Carbamyl, Phospho	5.7	103.6	1	123.3 (M:123.3)	2.3	417.04	884
885		true	tr|E1BHM6|E1BHM6_BOVIN	Sodium channel protein OS=Bos taurus GN=SCN11A PE=3 SV=2	3	Carbamyl, Oxidation, Phospho	8.6	204.4	1	123.3 (M:123.3)	1.7	476.43	885
886		true	tr|E1BM83|E1BM83_BOVIN	Uncharacterized protein OS=Bos taurus GN=FAM179B PE=4 SV=2	2	Carbamyl, Phospho	8.7	194.3	1	123.3 (M:123.3)	1.1	598.89	886
887		true	tr|E1BPX8|E1BPX8_BOVIN	Uncharacterized protein (Fragment) OS=Bos taurus GN=MYH7B PE=4 SV=2	2	Carbamidomethyl, Carbamyl, Carboxymethyl, Phospho, Glu->pyro-Glu	5.7	221.4	1	123.2 (M:123.2)	0.9	966.95	887
888		true	tr|F1N1S2|F1N1S2_BOVIN	Uncharacterized protein OS=Bos taurus GN=MAP1B PE=4 SV=2	5	Carbamyl, Oxidation, Phospho	4.7	270.1	2	123.0 (M:123.0)	2.1	727.84	888
889		true	sp|P28782|S10A8_BOVIN	Protein S100-A8 OS=Bos taurus GN=S100A8 PE=1 SV=2	2	Carbamidomethyl, Carbamyl, Phospho	5.1	10.5	1	122.8 (M:122.8)	18.0	13.47	889
890		true	tr|F1N2D5|F1N2D5_BOVIN	Uncharacterized protein OS=Bos taurus GN=IDS PE=4 SV=2	3	Oxidation, Glu->pyro-Glu	5.8	61.3	1	122.8 (M:122.8)	5.1	9.41	890
891		true	tr|L7X3K5|L7X3K5_SBV	M polyprotein OS=Schmallenberg virus GN=M PE=4 SV=1	3	Carbamidomethyl, Carbamyl, Phospho	8.5	158.8	34	122.8 (M:122.8)	3.8	376.86	891
892		true	tr|E1BJ30|E1BJ30_BOVIN	Uncharacterized protein OS=Bos taurus GN=PRDM1 PE=4 SV=1	1	Carbamidomethyl, Carbamyl, Carboxymethyl, Oxidation, Phospho	8.7	91.4	1	122.7 (M:122.7)	2.4	25818.74	892
893		true	tr|F1MTP1|F1MTP1_BOVIN	Uncharacterized protein OS=Bos taurus PE=4 SV=2	2	Carbamidomethyl, Carbamyl, Carboxymethyl, Oxidation, Phospho	9.9	187.9	1	122.7 (M:122.7)	1.9	294.94	893
894		true	tr|F1MM07|F1MM07_BOVIN	Uncharacterized protein OS=Bos taurus PE=4 SV=2	6	Carbamidomethyl, Carbamyl, Carboxymethyl, Phospho	5.6	222.5	2	122.7 (M:122.7)	1.4	502.75	894
895		true	tr|F1MX04|F1MX04_BOVIN	Uncharacterized protein (Fragment) OS=Bos taurus GN=EIF4G1 PE=4 SV=2	2	Carbamyl, Oxidation, Phospho	5.2	178.5	2	122.6 (M:122.6)	1.2	529.27	895
896		true	tr|A6QLS9|A6QLS9_BOVIN	RAB10 protein OS=Bos taurus GN=RAB10 PE=2 SV=1	3	Oxidation	8.6	22.5	1	122.6 (M:122.6)	18.5	346.21	896
897		true	tr|B2C5Y0|B2C5Y0_PI3B	RNA-directed RNA polymerase L OS=Bovine parainfluenza 3 virus GN=L PE=3 SV=1	6	Carbamyl, Oxidation, Phospho	6.1	255.5	10	122.6 (M:122.6)	3.0	40.49	897
898		true	sp|Q5KR49|TPM1_BOVIN	Tropomyosin alpha-1 chain OS=Bos taurus GN=TPM1 PE=2 SV=1	2	Carbamyl, Oxidation, Phospho	4.7	32.7	2	122.5 (M:122.5)	6.0	42.89	898
899		true	tr|A5D7P5|A5D7P5_BOVIN	TUBGCP2 protein OS=Bos taurus GN=TUBGCP2 PE=2 SV=1	4	Carbamyl, Oxidation, Phospho	6.4	102.7	1	122.5 (M:122.5)	4.2	553.30	899
900		true	tr|F1MER1|F1MER1_BOVIN	Uncharacterized protein (Fragment) OS=Bos taurus GN=CDYL2 PE=4 SV=2	3	Carbamidomethyl, Carbamyl, Carboxymethyl, Oxidation, Phospho, Glu->pyro-Glu	9.0	55.3	2	122.4 (M:122.4)	3.6	20189.32	900
901		true	sp|Q32KS2|DNAI1_BOVIN	Dynein intermediate chain 1, axonemal OS=Bos taurus GN=DNAI1 PE=2 SV=1	3	Carbamyl, Oxidation, Phospho	6.2	79.8	1	122.4 (M:122.4)	2.3	873.03	901
902		true	tr|F1N735|F1N735_BOVIN	Uncharacterized protein (Fragment) OS=Bos taurus GN=KDM2A PE=4 SV=2	4	Carbamidomethyl, Carbamyl, Carboxymethyl, Oxidation, Phospho	8.7	132.5	1	122.4 (M:122.4)	4.2	15625.47	902
903		true	tr|F1MC50|F1MC50_BOVIN	Uncharacterized protein (Fragment) OS=Bos taurus GN=ITSN2 PE=4 SV=2	4	Carbamidomethyl, Carbamyl, Oxidation, Phospho, Glu->pyro-Glu	8.4	190.8	1	122.2 (M:122.2)	2.7	605.08	903
904		true	tr|E1BFL2|E1BFL2_BOVIN	Uncharacterized protein OS=Bos taurus GN=ERCC6 PE=4 SV=2	3	Carbamyl, Oxidation, Phospho	8.7	166.7	1	122.2 (M:122.2)	1.8	841.85	904
905		true	tr|E1BBM3|E1BBM3_BOVIN	Uncharacterized protein OS=Bos taurus GN=NEK1 PE=4 SV=2	4	Carbamyl, Oxidation, Phospho, Glu->pyro-Glu	5.5	145.0	1	122.2 (M:122.2)	2.3	409.73	905
906		true	sp|A5PKL1|OXR1_BOVIN	Oxidation resistance protein 1 OS=Bos taurus GN=OXR1 PE=2 SV=2	4	Carbamyl, Oxidation, Phospho	5.7	98.1	3	122.1 (M:122.1)	3.6	563.44	906
907		true	tr|E1B801|E1B801_BOVIN	Uncharacterized protein OS=Bos taurus GN=ARHGAP35 PE=4 SV=1	3	Carbamyl, Phospho, Glu->pyro-Glu	6.2	170.4	1	121.9 (M:121.9)	2.5	524.10	907
908		true	tr|E1B842|E1B842_BOVIN	Uncharacterized protein OS=Bos taurus GN=HIVEP2 PE=4 SV=1	3	Carbamyl, Oxidation, Phospho	6.5	266.8	1	121.9 (M:121.9)	1.1	530.66	908
909		true	tr|E1BMH2|E1BMH2_BOVIN	Uncharacterized protein OS=Bos taurus GN=LRRC16B PE=4 SV=2	1	Carbamyl, Oxidation, Phospho	7.7	149.8	1	121.9 (M:121.9)	0.5	27.05	909
910		true	tr|F1N482|F1N482_BOVIN	Uncharacterized protein (Fragment) OS=Bos taurus GN=RGNEF PE=4 SV=2	3	Carbamidomethyl, Carbamyl, Carboxymethyl, Oxidation, Phospho	5.9	153.9	2	121.9 (M:121.9)	2.9	24.26	910
911		true	tr|F1MCL7|F1MCL7_BOVIN	Uncharacterized protein OS=Bos taurus PE=4 SV=2	3	Carbamidomethyl, Carboxymethyl, Oxidation, Phospho	8.8	146.2	4	121.7 (M:121.7)	2.5	417.12	911
912		true	tr|F1N166|F1N166_BOVIN	Uncharacterized protein OS=Bos taurus GN=SMARCA1 PE=4 SV=2	5	Carbamidomethyl, Carbamyl, Phospho, Glu->pyro-Glu	8.6	125.1	1	121.6 (M:121.6)	4.3	732.76	912
913		true	tr|Q2KJE7|Q2KJE7_BOVIN	Proteasome (Prosome, macropain) activator subunit 1 (PA28 alpha) OS=Bos taurus GN=PSME1 PE=2 SV=1	3	Carbamidomethyl, Gln->pyro-Glu, Carbamyl, Carboxymethyl	5.8	28.7	2	121.6 (M:121.6)	12.9	800.47	913
914		true	tr|E1B8Z3|E1B8Z3_BOVIN	Uncharacterized protein OS=Bos taurus GN=DAAM2 PE=4 SV=2	3	Carbamidomethyl, Carbamyl, Oxidation, Phospho, Glu->pyro-Glu	6.3	126.4	1	121.5 (M:121.5)	2.4	504.11	914
915		true	tr|F1MUQ4|F1MUQ4_BOVIN	Uncharacterized protein OS=Bos taurus GN=CLIP4 PE=4 SV=1	2	Carbamyl, Oxidation, Phospho	8.9	76.0	2	121.3 (M:121.3)	1.7	6.53	915
916		true	tr|F1MFA3|F1MFA3_BOVIN	Uncharacterized protein OS=Bos taurus GN=PITRM1 PE=3 SV=2	4	Carbamidomethyl, Carbamyl, Carboxymethyl, Oxidation, Phospho	6.0	116.3	1	121.2 (M:121.2)	3.9	33.35	916
917		true	tr|E1BIF0|E1BIF0_BOVIN	DNA polymerase OS=Bos taurus GN=POLE PE=3 SV=2	4	Carbamidomethyl, Carbamyl, Carboxymethyl, Phospho, Glu->pyro-Glu	6.0	262.2	1	121.1 (M:121.1)	1.9	12834.88	917
918		true	tr|B6VAP7|B6VAP7_BOVIN	CDC42 protein OS=Bos taurus GN=CDC42 PE=2 SV=1	2	Carbamidomethyl, Gln->pyro-Glu, Carbamyl	5.5	21.2	5	121.1 (M:121.1)	11.0	11.26	918
919		true	tr|H9BSP4|H9BSP4_RVFV	Polymerase OS=Rift valley fever virus PE=4 SV=1	3	Carbamidomethyl, Carbamyl, Carboxymethyl, Oxidation, Phospho	6.2	237.9	2	120.9 (M:120.9)	1.6	564.45	919
920		true	tr|F1MSQ6|F1MSQ6_BOVIN	Uncharacterized protein (Fragment) OS=Bos taurus GN=NEFH PE=3 SV=2	4	Carbamidomethyl, Carbamyl, Phospho	8.4	118.2	1	120.8 (M:120.8)	2.3	529.01	920
921		true	tr|F1MNL8|F1MNL8_BOVIN	Uncharacterized protein OS=Bos taurus GN=AHCTF1 PE=4 SV=2	3	Carbamyl, Oxidation, Phospho	5.7	252.7	1	120.6 (M:120.6)	1.5	575.70	921
922		true	tr|G5E5K7|G5E5K7_BOVIN	Uncharacterized protein OS=Bos taurus GN=LOC616911 PE=4 SV=1	4	Carbamyl, Oxidation, Phospho	5.4	51.7	1	120.5 (M:120.5)	4.0	327.37	922
923		true	tr|F1N734|F1N734_BOVIN	Uncharacterized protein (Fragment) OS=Bos taurus GN=CHD6 PE=4 SV=2	1	Carbamidomethyl, Gln->pyro-Glu, Carbamyl, Carboxymethyl, Phospho	5.8	304.5	1	120.4 (M:120.4)	0.0	8547.12	923
924		true	tr|E1BM96|E1BM96_BOVIN	Uncharacterized protein OS=Bos taurus GN=MAGI3 PE=4 SV=2	3	Carbamyl, Phospho	8.3	161.3	1	120.3 (M:120.3)	1.4	1003.49	924
925		true	sp|A7MB80|GTF2I_BOVIN	General transcription factor II-I OS=Bos taurus GN=GTF2I PE=2 SV=1	4	Carbamidomethyl, Carbamyl, Carboxymethyl, Oxidation, Phospho	7.1	110.1	1	120.3 (M:120.3)	2.1	26980.39	925
926		true	tr|F1N2K7|F1N2K7_BOVIN	Uncharacterized protein OS=Bos taurus GN=PIKFYVE PE=4 SV=2	6	Carbamidomethyl, Carbamyl, Oxidation, Phospho, Glu->pyro-Glu	6.2	237.4	1	120.0 (M:120.0)	2.2	212.35	926
927		true	tr|F1MDF3|F1MDF3_BOVIN	Uncharacterized protein OS=Bos taurus GN=ALS2 PE=4 SV=2	3	Gln->pyro-Glu, Carbamyl, Phospho	5.8	183.7	1	120.0 (M:120.0)	1.6	45.63	927
928		true	tr|F1MY97|F1MY97_BOVIN	pre-rRNA processing protein FTSJ3 OS=Bos taurus GN=FTSJ3 PE=3 SV=2	6	Carbamyl, Phospho	9.2	94.9	2	119.9 (M:119.9)	6.3	794.26	928
929		true	tr|E1BN16|E1BN16_BOVIN	Uncharacterized protein OS=Bos taurus GN=CCDC18 PE=4 SV=2	1	Carbamyl, Phospho	5.5	169.9	1	119.8 (M:119.8)	0.0	407.34	929
930		true	tr|F1N740|F1N740_BOVIN	Uncharacterized protein (Fragment) OS=Bos taurus GN=FRAS1 PE=4 SV=2	6	Carbamidomethyl, Carbamyl, Carboxymethyl, Phospho, Glu->pyro-Glu	5.6	442.1	1	119.8 (M:119.8)	1.3	28749.85	930
931		true	tr|F1MQ59|F1MQ59_BOVIN	Uncharacterized protein OS=Bos taurus GN=KDM5A PE=4 SV=2	5	Carbamyl, Phospho	6.2	192.1	1	119.7 (M:119.7)	2.6	652.33	931
932		true	tr|F1N644|F1N644_BOVIN	Uncharacterized protein (Fragment) OS=Bos taurus GN=RGL1 PE=4 SV=2	2	Carbamyl, Phospho	5.8	81.2	1	119.7 (M:119.7)	4.0	384.14	932
933		true	tr|Q8JMI4|Q8JMI4_BVDV	Polyprotein (Fragment) OS=Bovine viral diarrhea virus PE=4 SV=1	3	Carbamidomethyl, Carbamyl, Carboxymethyl, Phospho	9.0	125.6	1	119.6 (M:119.6)	3.6	36.75	933
934		true	tr|F1MY16|F1MY16_BOVIN	Uncharacterized protein (Fragment) OS=Bos taurus GN=AKAP13 PE=4 SV=2	5	Carbamidomethyl, Carbamyl, Carboxymethyl, Oxidation, Phospho, Glu->pyro-Glu	5.1	255.8	1	119.6 (M:119.6)	1.6	16429.28	934
935		true	tr|E1BQ04|E1BQ04_BOVIN	Uncharacterized protein OS=Bos taurus GN=BLM PE=4 SV=2	4	Carbamyl, Oxidation, Phospho	8.4	158.6	1	119.5 (M:119.5)	2.6	945.55	935
936		true	tr|F1MLB2|F1MLB2_BOVIN	Uncharacterized protein OS=Bos taurus GN=CHD8 PE=4 SV=2	2	Carbamyl, Phospho	6.0	286.2	1	119.5 (M:119.5)	0.8	485.30	936
937		true	tr|F1N616|F1N616_BOVIN	Histone deacetylase OS=Bos taurus GN=HDAC7 PE=3 SV=2	4	Carbamidomethyl, Carbamyl, Carboxymethyl, Phospho	7.3	106.8	1	119.3 (M:119.3)	1.8	34115.13	937
938		true	tr|E1B8L8|E1B8L8_BOVIN	Uncharacterized protein OS=Bos taurus GN=FCAMR PE=4 SV=1	3	Carbamidomethyl	9.6	57.3	1	119.3 (M:119.3)	5.9	10.00	938
939		true	tr|F1MNI1|F1MNI1_BOVIN	Uncharacterized protein OS=Bos taurus GN=CEP164 PE=4 SV=2	2	Carbamyl, Phospho, Glu->pyro-Glu	5.2	163.2	2	119.2 (M:119.2)	1.7	784.47	939
940		true	tr|Q2T9Y5|Q2T9Y5_BOVIN	DNA ligase OS=Bos taurus GN=LIG3 PE=2 SV=1	4	Carbamidomethyl, Carbamyl, Oxidation, Phospho	9.3	105.0	2	119.2 (M:119.2)	3.3	730.08	940
941		true	tr|F1N729|F1N729_BOVIN	Uncharacterized protein OS=Bos taurus GN=KIAA1614 PE=4 SV=2	3	Carbamidomethyl, Carbamyl, Oxidation, Phospho	9.4	125.0	1	119.1 (M:119.1)	2.7	963.60	941
942		true	tr|F1N102|F1N102_BOVIN	Uncharacterized protein OS=Bos taurus GN=C8B PE=4 SV=2	4	Carbamidomethyl	8.4	66.6	3	119.0 (M:119.0)	9.0	10.48	942
943		true	sp|P08169|MPRI_BOVIN	Cation-independent mannose-6-phosphate receptor OS=Bos taurus GN=IGF2R PE=1 SV=2	3	Carbamidomethyl, Carbamyl	5.6	274.4	2	118.9 (M:118.9)	1.2	8.46	943
944		true	tr|B8Y7I4|B8Y7I4_BOVIN	Serum amyloid A protein (Fragment) OS=Bos taurus GN=SAA3 PE=2 SV=1	2		9.6	12.7	5	118.9 (M:118.9)	19.6	11.30	944
945		true	tr|G3X7K5|G3X7K5_BOVIN	Uncharacterized protein (Fragment) OS=Bos taurus GN=NCOR2 PE=4 SV=1	3	Carbamidomethyl, Carbamyl, Oxidation, Phospho	8.6	250.4	1	118.8 (M:118.8)	1.2	37.16	945
946		true	tr|F1MJQ9|F1MJQ9_BOVIN	Uncharacterized protein OS=Bos taurus GN=GMCL1 PE=4 SV=1	5	Carbamyl, Oxidation, Phospho, Glu->pyro-Glu	6.7	60.0	2	118.6 (M:118.6)	6.7	681.83	946
947		true	tr|F1MZT3|F1MZT3_BOVIN	Uncharacterized protein OS=Bos taurus GN=MPHOSPH9 PE=4 SV=2	3	Carbamyl, Oxidation, Phospho, Glu->pyro-Glu	5.9	115.9	1	118.5 (M:118.5)	2.3	672.84	947
948		true	tr|E1BI72|E1BI72_BOVIN	Uncharacterized protein OS=Bos taurus GN=ADAMTS9 PE=4 SV=2	3	Carbamidomethyl, Carbamyl, Carboxymethyl, Phospho	7.7	216.3	1	118.5 (M:118.5)	1.4	45.46	948
949		true	tr|E1B8D2|E1B8D2_BOVIN	Uncharacterized protein OS=Bos taurus GN=MSH5 PE=3 SV=1	2	Gln->pyro-Glu, Carbamyl, Oxidation, Phospho	5.7	92.4	1	118.5 (M:118.5)	4.0	524.24	949
950		true	sp|Q148F1|COF2_BOVIN	Cofilin-2 OS=Bos taurus GN=CFL2 PE=2 SV=1	4	Carbamyl, Phospho	7.7	18.7	2	118.3 (M:118.3)	12.0	566.79	950
951		true	tr|G0XTR1|G0XTR1_COWPX	Putative uncharacterized protein OS=Cowpox virus GN=CPXV_FIN2000_MAN_206 PE=4 SV=1	2	Carbamyl, Oxidation, Phospho	6.1	218.3	3	118.3 (M:118.3)	1.1	790.60	951
952		true	tr|F1N747|F1N747_BOVIN	Uncharacterized protein OS=Bos taurus GN=CIT PE=4 SV=2	2	Carbamidomethyl, Carbamyl, Carboxymethyl, Phospho	6.7	236.6	2	118.0 (M:118.0)	1.1	846.88	952
953		true	tr|F1MG90|F1MG90_BOVIN	Uncharacterized protein OS=Bos taurus GN=WDFY4 PE=4 SV=2	2	Carbamyl, Oxidation, Phospho	6.0	353.9	1	118.0 (M:118.0)	0.5	851.23	953
954		true	tr|F1MQ30|F1MQ30_BOVIN	Uncharacterized protein (Fragment) OS=Bos taurus GN=FGD6 PE=4 SV=1	4	Carbamidomethyl, Carbamyl, Carboxymethyl, Oxidation, Phospho, Glu->pyro-Glu	6.8	160.9	2	117.8 (M:117.8)	3.8	349.40	954
955		true	tr|E1BJV5|E1BJV5_BOVIN	Uncharacterized protein OS=Bos taurus GN=ZNF638 PE=4 SV=2	4	Carbamyl, Phospho	6.1	218.9	1	117.8 (M:117.8)	2.0	564.59	955
956		true	tr|F1MJB0|F1MJB0_BOVIN	Uncharacterized protein (Fragment) OS=Bos taurus GN=FILIP1L PE=4 SV=2	3	Carbamyl, Phospho	6.3	107.0	2	117.7 (M:117.7)	2.0	703.43	956
957		true	sp|Q3T191|CIDEB_BOVIN	Cell death activator CIDE-B OS=Bos taurus GN=CIDEB PE=2 SV=1	5	Carbamyl, Oxidation, Phospho	9.3	24.6	1	117.6 (M:117.6)	6.4	276.37	957
958		true	tr|F1N775|F1N775_BOVIN	Uncharacterized protein OS=Bos taurus GN=MYH8 PE=4 SV=2	5	Carbamidomethyl, Carbamyl, Oxidation, Phospho, Glu->pyro-Glu	5.6	222.6	1	117.4 (M:117.4)	3.8	619.53	958
959		true	sp|Q0V8H6|MOV10_BOVIN	Putative helicase MOV-10 OS=Bos taurus GN=MOV10 PE=2 SV=1	2	Carbamidomethyl, Carbamyl, Phospho	9.1	113.8	1	117.4 (M:117.4)	1.8	645.80	959
960		true	tr|E1BCW5|E1BCW5_BOVIN	Uncharacterized protein (Fragment) OS=Bos taurus GN=ADAMTSL3 PE=4 SV=2	3	Carbamidomethyl, Carbamyl, Phospho, Glu->pyro-Glu	8.6	182.4	3	117.4 (M:117.4)	1.6	54.09	960
961		true	tr|F1MT17|F1MT17_BOVIN	One cut domain family member OS=Bos taurus GN=CUX2 PE=3 SV=2	4	Carbamyl, Oxidation, Phospho	5.6	163.2	1	117.1 (M:117.1)	2.3	692.50	961
962		true	sp|A6QPU5|SYDM_BOVIN	Aspartate--tRNA ligase, mitochondrial OS=Bos taurus GN=DARS2 PE=2 SV=1	3	Carbamidomethyl, Carbamyl, Carboxymethyl, Oxidation	7.0	73.6	2	117.1 (M:117.1)	4.6	33405.05	962
963		true	tr|E1BD97|E1BD97_BOVIN	Uncharacterized protein (Fragment) OS=Bos taurus GN=KIAA0100 PE=4 SV=2	3	Carbamidomethyl, Carbamyl, Carboxymethyl, Oxidation, Phospho	6.6	250.6	1	116.9 (M:116.9)	1.9	18562.16	963
964		true	tr|A6QLL8|A6QLL8_BOVIN	ALDOA protein OS=Bos taurus GN=ALDOA PE=2 SV=1	3		8.4	39.4	1	116.9 (M:116.9)	10.7	11.56	964
965		true	sp|A6QPT7|ERAP2_BOVIN	Endoplasmic reticulum aminopeptidase 2 OS=Bos taurus GN=ERAP2 PE=2 SV=1	4	Carbamyl, Oxidation, Phospho	6.2	109.6	1	116.8 (M:116.8)	5.0	18.43	965
966		true	tr|F1MIM9|F1MIM9_BOVIN	Uncharacterized protein (Fragment) OS=Bos taurus GN=IQSEC2 PE=4 SV=2	3	Carbamyl, Oxidation, Phospho	9.1	145.8	2	116.6 (M:116.6)	3.2	367.97	966
967		true	tr|E1BB39|E1BB39_BOVIN	Uncharacterized protein OS=Bos taurus GN=VWA5B1 PE=4 SV=2	5	Carbamidomethyl, Carbamyl, Carboxymethyl, Phospho	9.1	134.0	1	116.6 (M:116.6)	4.7	14791.53	967
968		true	tr|F1N1G7|F1N1G7_BOVIN	Kinesin-like protein OS=Bos taurus GN=KIF5B PE=3 SV=2	3	Carbamyl, Oxidation, Phospho	6.1	109.7	1	116.5 (M:116.5)	3.3	60.87	968
969		true	tr|E1BFN3|E1BFN3_BOVIN	Uncharacterized protein OS=Bos taurus GN=AHI1 PE=4 SV=1	4	Gln->pyro-Glu, Carbamyl, Oxidation, Phospho	7.5	131.1	1	116.3 (M:116.3)	3.0	768.14	969
970		true	tr|E1BFV0|E1BFV0_BOVIN	Uncharacterized protein OS=Bos taurus GN=KPNB1 PE=4 SV=2	3	Carbamyl, Phospho	4.7	97.2	1	116.1 (M:116.1)	3.7	715.36	970
971		true	tr|R9S015|R9S015_BVDV	Polyprotein (Fragment) OS=Bovine viral diarrhea virus PE=4 SV=1	2	Carbamidomethyl, Carbamyl, Oxidation, Phospho	8.7	121.1	2	116.1 (M:116.1)	0.8	873.78	971
972		true	tr|G0XW12|G0XW12_COWPX	A-type inclusion protein OS=Cowpox virus GN=CPXV_GER1998_2_150 PE=4 SV=1	2	Carbamyl, Phospho	5.2	148.4	22	116.1 (M:116.1)	2.0	751.67	972
973		true	tr|G3X6V3|G3X6V3_BOVIN	Uncharacterized protein (Fragment) OS=Bos taurus GN=KIAA1210 PE=4 SV=1	6	Carbamyl, Oxidation, Phospho	9.3	170.0	1	116.0 (M:116.0)	4.3	381.72	973
974		true	tr|G3MXH4|G3MXH4_BOVIN	Uncharacterized protein (Fragment) OS=Bos taurus GN=ZIC5 PE=4 SV=1	3	Carbamidomethyl, Carbamyl, Phospho	9.4	21.9	1	115.9 (M:115.9)	3.5	642.72	974
975		true	tr|A6QP77|A6QP77_BOVIN	TCOF1 protein (Fragment) OS=Bos taurus GN=TCOF1 PE=2 SV=1	3	Carbamyl, Phospho	9.2	138.8	1	115.8 (M:115.8)	2.8	959.72	975
976		true	tr|C6KH61|C6KH61_BOVIN	Potassium channel subfamily U member 1 OS=Bos taurus GN=KCNU1 PE=2 SV=1	3	Carbamyl, Oxidation, Phospho	8.2	129.3	1	115.7 (M:115.7)	1.4	883.17	976
977		true	tr|A6QLQ6|A6QLQ6_BOVIN	PARVB protein OS=Bos taurus GN=PARVB PE=2 SV=1	2	Carbamyl, Oxidation, Phospho	5.9	41.7	2	115.7 (M:115.7)	4.1	101.74	977
978		true	tr|F1MHQ4|F1MHQ4_BOVIN	Fatty acid-binding protein, adipocyte OS=Bos taurus GN=FABP4 PE=1 SV=2	4	Carbamidomethyl, Carbamyl, Phospho	5.5	14.6	2	115.6 (M:115.6)	28.0	289.25	978
979		true	tr|G3N0C1|G3N0C1_BOVIN	Uncharacterized protein (Fragment) OS=Bos taurus GN=ANK2 PE=4 SV=1	3	Carbamidomethyl, Carbamyl, Carboxymethyl, Oxidation, Phospho	8.2	255.6	1	115.6 (M:115.6)	1.3	701.30	979
980		true	sp|Q0P5J6|K1C27_BOVIN	Keratin, type I cytoskeletal 27 OS=Bos taurus GN=KRT27 PE=2 SV=1	5	Carbamyl	5.0	49.9	1	115.6 (M:115.6)	8.9	380.07	980
981		true	tr|F1N329|F1N329_BOVIN	Uncharacterized protein OS=Bos taurus GN=TOPORS PE=4 SV=2	4	Carbamidomethyl, Carbamyl, Oxidation, Phospho	9.8	125.2	1	115.4 (M:115.4)	2.8	784.85	981
982		true	tr|Q2TBT6|Q2TBT6_BOVIN	Multiple inositol polyphosphate histidine phosphatase, 1 OS=Bos taurus GN=MINPP1 PE=2 SV=1	2	Carbamidomethyl, Carbamyl, Carboxymethyl, Oxidation, Phospho	8.0	41.4	2	115.4 (M:115.4)	6.3	541.33	982
983		true	tr|E1B9K4|E1B9K4_BOVIN	Uncharacterized protein OS=Bos taurus GN=HMCN2 PE=4 SV=2	3	Carbamidomethyl, Carbamyl, Carboxymethyl, Phospho	5.4	545.0	1	115.4 (M:115.4)	0.5	605.96	983
984		true	tr|F1MWE5|F1MWE5_BOVIN	Uncharacterized protein OS=Bos taurus GN=MTERFD2 PE=4 SV=1	3	Carbamyl, Oxidation, Phospho	6.4	39.4	2	115.3 (M:115.3)	11.7	347.15	984
985		true	tr|E1BH78|E1BH78_BOVIN	Uncharacterized protein OS=Bos taurus GN=SNRNP200 PE=4 SV=1	5	Carbamidomethyl, Carbamyl, Carboxymethyl, Oxidation, Phospho	5.7	244.1	1	115.2 (M:115.2)	2.4	18347.20	985
986		true	tr|F1MUW6|F1MUW6_BOVIN	Uncharacterized protein OS=Bos taurus GN=TMF1 PE=4 SV=2	5	Carbamyl, Phospho, Glu->pyro-Glu	5.0	123.2	1	115.2 (M:115.2)	4.3	456.75	986
987		true	tr|F1MV90|F1MV90_BOVIN	Uncharacterized protein OS=Bos taurus GN=LOC101906472 PE=3 SV=2	1	Carbamyl, Oxidation	5.0	29.0	1	115.2 (M:115.2)	5.6	9.93	987
988		true	tr|F1N7A3|F1N7A3_BOVIN	Uncharacterized protein (Fragment) OS=Bos taurus PE=4 SV=1	4	Carbamyl, Oxidation, Phospho	9.8	29.3	1	115.2 (M:115.2)	11.5	340.35	988
989		true	tr|E1BM99|E1BM99_BOVIN	Uncharacterized protein OS=Bos taurus GN=ABCC12 PE=3 SV=2	5	Carbamidomethyl, Carboxymethyl, Phospho	8.5	153.1	1	115.1 (M:115.1)	3.5	23772.24	989
990		true	tr|F1MRB9|F1MRB9_BOVIN	Uncharacterized protein OS=Bos taurus GN=NOL8 PE=4 SV=2	2	Carbamidomethyl, Carbamyl, Carboxymethyl, Phospho	6.7	131.1	2	115.0 (M:115.0)	1.6	34671.00	990
991		true	tr|S5RCL6|S5RCL6_COWPX	A-type inclusion protein OS=Cowpox virus PE=4 SV=1	2	Carbamyl, Phospho	5.2	151.5	1	114.9 (M:114.9)	1.5	752.39	991
992		true	tr|G3X7C0|G3X7C0_BOVIN	Structural maintenance of chromosomes protein OS=Bos taurus GN=SMC1A PE=3 SV=1	3	Carbamyl, Phospho	7.5	143.1	2	114.8 (M:114.8)	2.0	590.43	992
993		true	tr|F1N6T6|F1N6T6_BOVIN	Uncharacterized protein (Fragment) OS=Bos taurus GN=TARBP1 PE=4 SV=2	5	Carbamidomethyl, Carbamyl, Carboxymethyl, Oxidation, Phospho, Glu->pyro-Glu	6.7	149.9	1	114.7 (M:114.7)	4.6	22465.28	993
994		true	tr|E1BMS3|E1BMS3_BOVIN	Uncharacterized protein OS=Bos taurus GN=DUOX2 PE=4 SV=1	4	Carbamidomethyl, Carbamyl, Carboxymethyl, Oxidation	8.1	175.9	1	114.5 (M:114.5)	3.5	14930.99	994
995		true	tr|F1MH71|F1MH71_BOVIN	Uncharacterized protein OS=Bos taurus GN=PHF2 PE=4 SV=2	2	Carbamidomethyl, Carbamyl, Phospho	9.1	123.9	1	114.5 (M:114.5)	1.7	919.18	995
996		true	sp|Q2KIU3|HP252_BOVIN	Protein HP-25 homolog 2 OS=Bos taurus PE=2 SV=1	2	Carbamidomethyl, Carbamyl	5.1	22.9	1	114.5 (M:114.5)	14.9	9.87	996
997		true	tr|G3MY44|G3MY44_BOVIN	Uncharacterized protein (Fragment) OS=Bos taurus PE=4 SV=1	5	Carbamidomethyl, Carbamyl, Carboxymethyl, Oxidation, Phospho, Glu->pyro-Glu	6.0	117.7	1	114.5 (M:114.5)	5.0	21489.94	997
998		true	tr|G3MZM6|G3MZM6_BOVIN	Uncharacterized protein OS=Bos taurus GN=RRP1B PE=4 SV=1	2	Carbamyl, Oxidation, Phospho	9.9	82.8	2	114.4 (M:114.4)	1.1	1018.69	998
999		true	tr|E1BK43|E1BK43_BOVIN	Uncharacterized protein OS=Bos taurus GN=NALCN PE=4 SV=2	1	Carbamidomethyl, Carbamyl, Carboxymethyl, Oxidation, Phospho	9.1	200.3	1	114.3 (M:114.3)	0.5	763.55	999
1000		true	tr|E1BNY3|E1BNY3_BOVIN	Uncharacterized protein OS=Bos taurus GN=SEMA6D PE=4 SV=2	3	Carbamyl, Phospho	8.8	119.5	1	114.2 (M:114.2)	3.3	504.71	1000
1001		true	tr|G3MXX3|G3MXX3_BOVIN	Uncharacterized protein (Fragment) OS=Bos taurus GN=CHD2 PE=4 SV=1	5	Gln->pyro-Glu, Carbamyl, Phospho	7.9	208.8	1	114.2 (M:114.2)	2.9	789.60	1001
1002		true	tr|E1BKM4|E1BKM4_BOVIN	Uncharacterized protein (Fragment) OS=Bos taurus GN=PDCD6IP PE=4 SV=2	3	Carbamidomethyl, Carbamyl, Oxidation	7.2	100.9	1	114.0 (M:114.0)	3.6	619.59	1002
1003		true	tr|H6V5G6|H6V5G6_BOVIN	MHC class I antigen (Fragment) OS=Bos taurus GN=BoLA-NC PE=3 SV=1	3		6.0	36.0	21	114.0 (M:114.0)	12.3	9.31	1003
1004		true	tr|E1BN11|E1BN11_BOVIN	Uncharacterized protein OS=Bos taurus GN=DCLRE1A PE=4 SV=1	4	Carbamidomethyl, Carbamyl, Phospho	8.6	118.3	1	113.9 (M:113.9)	3.7	676.71	1004
1005		true	tr|G3MXD5|G3MXD5_BOVIN	Kinesin-like protein OS=Bos taurus GN=KIF21B PE=3 SV=1	2	Carbamyl, Oxidation, Phospho, Glu->pyro-Glu	8.7	177.0	1	113.9 (M:113.9)	1.2	644.19	1005
1006		true	tr|G3N1L4|G3N1L4_BOVIN	Uncharacterized protein OS=Bos taurus GN=MTUS2 PE=4 SV=1	3	Carbamyl, Oxidation, Phospho	8.0	146.9	2	113.8 (M:113.8)	2.3	605.03	1006
1007		true	tr|E1BGG6|E1BGG6_BOVIN	Uncharacterized protein OS=Bos taurus GN=RFX5 PE=4 SV=1	3	Carbamidomethyl, Carbamyl, Carboxymethyl, Oxidation, Phospho	9.5	65.2	1	113.5 (M:113.5)	7.0	33656.45	1007
1008		true	tr|E1BJI0|E1BJI0_BOVIN	Uncharacterized protein OS=Bos taurus GN=TTC3 PE=4 SV=2	2	Carbamyl, Phospho	6.3	225.2	1	113.5 (M:113.5)	1.1	558.28	1008
1009		true	tr|E1BPK6|E1BPK6_BOVIN	Uncharacterized protein OS=Bos taurus GN=MYO6 PE=4 SV=2	3	Carbamidomethyl, Gln->pyro-Glu, Carbamyl, Oxidation, Phospho	8.7	149.5	1	113.3 (M:113.3)	2.5	789.22	1009
1010		true	tr|G3N0S6|G3N0S6_BOVIN	Phosphoinositide phospholipase C (Fragment) OS=Bos taurus GN=PLCH2 PE=4 SV=1	4	Carbamidomethyl, Carbamyl, Carboxymethyl, Oxidation, Phospho	8.5	160.9	2	113.1 (M:113.1)	3.4	10981.10	1010
1011		true	tr|E1B7T1|E1B7T1_BOVIN	Uncharacterized protein OS=Bos taurus GN=FILIP1 PE=4 SV=2	1	Gln->pyro-Glu, Carbamyl, Oxidation, Phospho	8.4	137.5	1	113.0 (M:113.0)	0.0	138.48	1011
1012		true	tr|E1BIU8|E1BIU8_BOVIN	Protein-tyrosine-phosphatase OS=Bos taurus GN=PTPRS PE=4 SV=1	3	Carbamyl, Oxidation, Phospho, Glu->pyro-Glu	6.3	212.4	1	112.7 (M:112.7)	2.5	561.46	1012
1013		true	tr|F1MD62|F1MD62_BOVIN	Uncharacterized protein (Fragment) OS=Bos taurus GN=ARHGAP20 PE=4 SV=2	6	Carbamidomethyl, Carbamyl, Phospho	7.1	124.4	1	112.7 (M:112.7)	4.5	308.37	1013
1014		true	tr|E1BK80|E1BK80_BOVIN	Rod cGMP-specific 3',5'-cyclic phosphodiesterase subunit alpha OS=Bos taurus GN=PDE6A PE=4 SV=2	3	Carbamidomethyl, Carbamyl, Oxidation, Phospho	5.3	99.2	5	112.6 (M:112.6)	2.9	439.57	1014
1015		true	tr|F1MJS9|F1MJS9_BOVIN	Uncharacterized protein (Fragment) OS=Bos taurus GN=PTPRC PE=4 SV=2	3	Carbamidomethyl, Carbamyl, Carboxymethyl, Phospho	5.7	143.2	3	112.6 (M:112.6)	1.9	1079.02	1015
1016		true	tr|A1L514|A1L514_BOVIN	Annexin OS=Bos taurus GN=ANXA4 PE=2 SV=1	1	Carbamyl	6.3	14.6	1	112.6 (M:112.6)	11.4	9.54	1016
1017		true	tr|F1MEL5|F1MEL5_BOVIN	Uncharacterized protein (Fragment) OS=Bos taurus GN=RASGRF2 PE=4 SV=2	3	Carbamidomethyl, Gln->pyro-Glu, Carbamyl, Carboxymethyl, Oxidation, Phospho	7.0	130.2	1	112.6 (M:112.6)	2.3	493.64	1017
1018		true	tr|A0JND7|A0JND7_BOVIN	ABO blood group (Transferase A, alpha 1-3-N-acetylgalactosaminyltransferase; transferase B, alpha 1-3-galactosyltransferase) OS=Bos taurus GN=ABO PE=2 SV=1	4	Carbamidomethyl, Carbamyl	8.7	41.9	1	112.5 (M:112.5)	19.1	302.69	1018
1019		true	sp|E1BNG3|ASCC3_BOVIN	Activating signal cointegrator 1 complex subunit 3 OS=Bos taurus GN=ascc3 PE=3 SV=1	3	Carbamyl, Oxidation, Phospho	6.4	250.6	1	112.5 (M:112.5)	1.4	693.81	1019
1020		true	sp|Q9TR36|PIPNB_BOVIN	Phosphatidylinositol transfer protein beta isoform OS=Bos taurus GN=PITPNB PE=1 SV=3	3	Carbamidomethyl	6.4	31.5	1	112.4 (M:112.4)	13.7	10.36	1020
1021		true	sp|Q7YS61-2|TRDMT_BOVIN	Isoform 2 of tRNA (cytosine-5-)-methyltransferase OS=Bos taurus GN=TRDMT1	3	Carbamyl, Oxidation, Phospho	6.1	42.8	2	112.4 (M:112.4)	6.6	534.08	1021
1022		true	tr|A7Z025|A7Z025_BOVIN	PRPF8 protein OS=Bos taurus GN=PRPF8 PE=2 SV=1	4	Carbamyl, Phospho	9.0	273.4	1	112.3 (M:112.3)	1.3	761.73	1022
1023		true	sp|Q5EA79|GALM_BOVIN	Aldose 1-epimerase OS=Bos taurus GN=GALM PE=2 SV=1	2		5.9	37.6	1	112.3 (M:112.3)	7.0	12.34	1023
1024		true	sp|Q29451|MA2B1_BOVIN	Lysosomal alpha-mannosidase OS=Bos taurus GN=MAN2B1 PE=1 SV=4	3	Carbamidomethyl	9.2	112.8	1	112.2 (M:112.2)	2.4	11.23	1024
1025		true	tr|G3N038|G3N038_BOVIN	Uncharacterized protein (Fragment) OS=Bos taurus GN=LOC101908442 PE=4 SV=1	2	Oxidation, Glu->pyro-Glu	5.3	39.3	1	112.2 (M:112.2)	2.1	1148.41	1025
1026		true	tr|E1B933|E1B933_BOVIN	Uncharacterized protein OS=Bos taurus GN=LRRIQ1 PE=4 SV=2	4	Carbamyl, Oxidation, Phospho	5.7	193.5	1	112.2 (M:112.2)	2.5	491.10	1026
1027		true	sp|P02584|PROF1_BOVIN	Profilin-1 OS=Bos taurus GN=PFN1 PE=1 SV=2	4	Oxidation	8.5	15.0	2	112.1 (M:112.1)	36.4	343.32	1027
1028		true	tr|F1MIZ4|F1MIZ4_BOVIN	Uncharacterized protein OS=Bos taurus GN=GRAMD2 PE=4 SV=1	4	Carbamidomethyl, Carbamyl, Carboxymethyl, Oxidation, Phospho	8.7	39.5	2	112.1 (M:112.1)	11.7	26340.44	1028
1029		true	tr|F1MFR1|F1MFR1_BOVIN	Uncharacterized protein OS=Bos taurus GN=HFM1 PE=4 SV=2	3	Carbamidomethyl, Gln->pyro-Glu, Carbamyl, Carboxymethyl, Oxidation, Phospho	6.6	162.6	1	112.0 (M:112.0)	2.2	19518.72	1029
1030		true	tr|F1MJR1|F1MJR1_BOVIN	Uncharacterized protein OS=Bos taurus GN=URB2 PE=4 SV=1	4	Carbamidomethyl, Carbamyl, Carboxymethyl, Phospho	6.4	169.5	2	111.8 (M:111.8)	2.3	484.71	1030
1031		true	sp|A6H6Z7|TPX2_BOVIN	Targeting protein for Xklp2 OS=Bos taurus GN=TPX2 PE=2 SV=1	2	Carbamyl, Oxidation, Phospho, Glu->pyro-Glu	9.4	81.5	2	111.7 (M:111.7)	1.4	843.67	1031
1032		true	sp|Q32KN9|PRLD1_BOVIN	PRELI domain-containing protein 1, mitochondrial OS=Bos taurus GN=PRELID1 PE=2 SV=1	5	Carbamyl, Phospho	9.7	25.2	1	111.5 (M:111.5)	12.8	480.83	1032
1033		true	tr|F1MJ53|F1MJ53_BOVIN	Kinesin-like protein (Fragment) OS=Bos taurus GN=KIF21A PE=3 SV=2	3	Carbamyl, Oxidation, Phospho	6.2	187.7	1	111.3 (M:111.3)	2.0	273.65	1033
1034		true	tr|Q9TRG8|Q9TRG8_BOVIN	Lactoferrin (Fragment) OS=Bos taurus PE=1 SV=1	3	Carbamidomethyl, Carbamyl	8.5	2.1	1	111.2 (M:111.2)	66.7	582.68	1034
1035		true	tr|G5E519|G5E519_BOVIN	Coiled-coil domain-containing protein 39 OS=Bos taurus GN=CCDC39 PE=4 SV=1	2	Carbamidomethyl, Carbamyl, Carboxymethyl, Oxidation, Phospho, Glu->pyro-Glu	6.7	110.1	3	111.2 (M:111.2)	2.4	21375.76	1035
1036		true	sp|Q3SZ43|UB2V2_BOVIN	Ubiquitin-conjugating enzyme E2 variant 2 OS=Bos taurus GN=UBE2V2 PE=2 SV=3	3		7.8	16.4	5	111.2 (M:111.2)	17.9	9.64	1036
1037		true	sp|Q9MYM4|LYAG_BOVIN	Lysosomal alpha-glucosidase OS=Bos taurus GN=GAA PE=2 SV=1	4	Carbamidomethyl, Oxidation	5.3	104.7	1	111.2 (M:111.2)	5.9	9.98	1037
1038		true	sp|Q2TA38|TEKT4_BOVIN	Tektin-4 OS=Bos taurus GN=TEKT4 PE=2 SV=1	1	Gln->pyro-Glu, Carbamyl, Phospho	6.0	51.9	1	111.1 (M:111.1)	4.0	504.44	1038
1039		true	sp|E1BB50|CDK12_BOVIN	Cyclin-dependent kinase 12 OS=Bos taurus GN=CDK12 PE=3 SV=1	3	Carbamyl, Phospho	9.5	140.6	2	111.1 (M:111.1)	2.1	32.32	1039
1040		true	tr|E1B7K5|E1B7K5_BOVIN	Uncharacterized protein OS=Bos taurus GN=CKAP5 PE=4 SV=2	4	Carbamyl, Oxidation, Phospho, Glu->pyro-Glu	8.0	225.0	1	111.0 (M:111.0)	2.0	752.94	1040
1041		true	tr|G3N2A9|G3N2A9_BOVIN	Uncharacterized protein (Fragment) OS=Bos taurus GN=BAI3 PE=4 SV=1	2	Carbamidomethyl, Carbamyl, Carboxymethyl, Phospho	6.4	138.9	2	111.0 (M:111.0)	2.2	34648.28	1041
1042		true	tr|G3MYB5|G3MYB5_BOVIN	Uncharacterized protein (Fragment) OS=Bos taurus GN=SHROOM2 PE=4 SV=1	4	Carbamidomethyl, Carbamyl, Carboxymethyl, Phospho	8.0	136.5	1	111.0 (M:111.0)	3.0	735.60	1042
1043		true	tr|E1B8S1|E1B8S1_BOVIN	Uncharacterized protein OS=Bos taurus GN=INTS1 PE=4 SV=2	3	Carbamyl, Oxidation, Phospho	6.0	242.9	1	110.9 (M:110.9)	1.3	27.73	1043
1044		true	tr|F1MSI9|F1MSI9_BOVIN	Uncharacterized protein OS=Bos taurus GN=DLG5 PE=4 SV=1	3	Carbamyl, Oxidation	7.1	213.7	1	110.9 (M:110.9)	1.0	876.37	1044
1045		true	sp|O97831-2|LPHN1_BOVIN	Isoform 2 of Latrophilin-1 OS=Bos taurus GN=LPHN1	3	Carbamidomethyl, Carbamyl, Carboxymethyl, Oxidation, Phospho	6.1	161.5	3	110.8 (M:110.8)	1.0	337.70	1045
1046		true	tr|F1MPU3|F1MPU3_BOVIN	Uncharacterized protein (Fragment) OS=Bos taurus GN=TRPM1 PE=4 SV=2	2	Carbamyl, Phospho	7.7	186.8	1	110.8 (M:110.8)	0.6	828.38	1046
1047		true	tr|F1MFH3|F1MFH3_BOVIN	Uncharacterized protein OS=Bos taurus GN=FREM2 PE=4 SV=2	3	Carbamidomethyl, Gln->pyro-Glu, Carbamyl, Phospho	4.9	350.9	1	110.8 (M:110.8)	0.9	31.58	1047
1048		true	tr|E1BBP2|E1BBP2_BOVIN	Uncharacterized protein OS=Bos taurus GN=CTNNAL1 PE=4 SV=2	5	Carbamidomethyl, Carbamyl, Carboxymethyl, Oxidation, Phospho	6.5	81.7	1	110.5 (M:110.5)	7.3	23041.62	1048
1049		true	tr|G5E6Q7|G5E6Q7_BOVIN	Uncharacterized protein (Fragment) OS=Bos taurus PE=4 SV=1	2	Carbamidomethyl, Carbamyl, Oxidation, Phospho	6.1	107.5	2	110.4 (M:110.4)	2.2	835.20	1049
1050		true	tr|G8JKZ8|G8JKZ8_BOVIN	Thioredoxin (Fragment) OS=Bos taurus GN=TXN PE=4 SV=1	2	Carbamidomethyl	4.8	10.9	2	110.4 (M:110.4)	22.7	11.10	1050
1051		true	tr|G3N2J7|G3N2J7_BOVIN	Uncharacterized protein OS=Bos taurus GN=DMXL1 PE=4 SV=1	2	Carbamyl, Oxidation, Phospho	5.8	340.0	3	110.3 (M:110.3)	1.0	43.49	1051
1052		true	tr|E1B9Q8|E1B9Q8_BOVIN	Uncharacterized protein OS=Bos taurus GN=ZNF609 PE=4 SV=2	3	Carbamyl, Oxidation, Phospho	8.2	151.0	1	110.2 (M:110.2)	1.6	587.63	1052
1053		true	tr|F1N2E8|F1N2E8_BOVIN	Uncharacterized protein OS=Bos taurus GN=TTF2 PE=4 SV=1	3	Carbamidomethyl, Carbamyl, Carboxymethyl, Phospho, Glu->pyro-Glu	8.5	129.2	2	110.2 (M:110.2)	2.5	25261.20	1053
1054		true	tr|E1BN58|E1BN58_BOVIN	Uncharacterized protein OS=Bos taurus GN=OTUD4 PE=4 SV=2	2	Carbamyl, Oxidation, Phospho	6.2	122.3	1	110.1 (M:110.1)	1.4	43.47	1054
1055		true	tr|E1BEK4|E1BEK4_BOVIN	Uncharacterized protein OS=Bos taurus GN=RAD54L2 PE=4 SV=2	1	Carbamyl, Oxidation, Glu->pyro-Glu	5.7	162.9	1	110.1 (M:110.1)	0.8	683.30	1055
1056		true	tr|E1B7Z4|E1B7Z4_BOVIN	Uncharacterized protein (Fragment) OS=Bos taurus GN=LOC511531 PE=4 SV=2	1	Carbamyl, Oxidation, Phospho	6.3	67.7	1	109.9 (M:109.9)	2.5	577.54	1056
1057		true	tr|Q3SZH5|Q3SZH5_BOVIN	Angiotensinogen OS=Bos taurus GN=AGT PE=2 SV=1	3	Carbamidomethyl	9.3	45.4	1	109.9 (M:109.9)	10.1	9.82	1057
1058		true	tr|G9BRW6|G9BRW6_COWPX	A-type inclusion protein OS=Cowpox virus GN=atip PE=4 SV=1	3	Carbamidomethyl, Carbamyl, Oxidation, Phospho	5.2	125.8	1	109.9 (M:109.9)	2.8	577.62	1058
1059		true	tr|E1BPM0|E1BPM0_BOVIN	Uncharacterized protein OS=Bos taurus GN=RASAL1 PE=4 SV=1	1	Carbamyl, Oxidation, Phospho	5.7	89.8	1	109.9 (M:109.9)	1.7	15.96	1059
1060		true	tr|Q2QJI2|Q2QJI2_COWPX	CPXV109 protein OS=Cowpox virus GN=CPXV109 PE=4 SV=1	5	Carbamyl, Oxidation, Phospho, Glu->pyro-Glu	7.7	146.5	17	109.8 (M:109.8)	5.1	201.51	1060
1061		true	tr|F1N1K4|F1N1K4_BOVIN	Uncharacterized protein (Fragment) OS=Bos taurus GN=ATP12A PE=3 SV=2	2	Carbamyl, Oxidation, Phospho	6.6	121.5	1	109.7 (M:109.7)	2.5	378.02	1061
1062		true	tr|F1MIR0|F1MIR0_BOVIN	Uncharacterized protein OS=Bos taurus GN=MCTP2 PE=4 SV=2	3	Carbamyl, Oxidation, Phospho	8.0	99.3	3	109.7 (M:109.7)	2.8	311.92	1062
1063		true	sp|P11017|GBB2_BOVIN	Guanine nucleotide-binding protein G(I)/G(S)/G(T) subunit beta-2 OS=Bos taurus GN=GNB2 PE=2 SV=3	2	Carbamidomethyl	5.6	37.3	2	109.7 (M:109.7)	6.8	12.96	1063
1064		true	tr|F1MMQ6|F1MMQ6_BOVIN	Uncharacterized protein (Fragment) OS=Bos taurus GN=MYO5B PE=4 SV=2	2	Carbamyl, Phospho	7.3	213.3	1	109.6 (M:109.6)	1.4	356.10	1064
1065		true	tr|F1ML06|F1ML06_BOVIN	Uncharacterized protein (Fragment) OS=Bos taurus GN=SREBF2 PE=4 SV=1	4	Carbamidomethyl, Carbamyl, Carboxymethyl, Oxidation, Phospho	9.1	119.4	4	109.6 (M:109.6)	4.5	9554.54	1065
1066		true	tr|Q0II27|Q0II27_BOVIN	LOC781710 protein (Fragment) OS=Bos taurus GN=LOC781710 PE=2 SV=1	2	Carbamyl, Oxidation, Phospho	5.9	71.1	3	109.6 (M:109.6)	2.7	53.44	1066
1067		true	tr|E1B8C2|E1B8C2_BOVIN	Uncharacterized protein OS=Bos taurus GN=NOM1 PE=4 SV=2	4	Carbamyl, Phospho	9.3	93.6	1	109.5 (M:109.5)	3.7	341.82	1067
1068		true	tr|E1BAS8|E1BAS8_BOVIN	Uncharacterized protein OS=Bos taurus GN=UBN1 PE=4 SV=1	4	Carbamidomethyl, Carbamyl, Oxidation, Phospho	9.3	121.6	3	109.5 (M:109.5)	3.4	765.11	1068
1069		true	tr|Q1ADE8|Q1ADE8_BOVIN	Alpha-1A subunit calcium channel long splice variant OS=Bos taurus GN=CACNA1A PE=2 SV=1	2	Carbamidomethyl, Carbamyl, Oxidation	8.9	281.5	6	109.5 (M:109.5)	0.6	892.16	1069
1070		true	tr|F1MD95|F1MD95_BOVIN	Uncharacterized protein (Fragment) OS=Bos taurus GN=CLSTN1 PE=4 SV=1	2	Carbamidomethyl, Gln->pyro-Glu, Phospho	4.7	106.4	1	109.2 (M:109.2)	2.0	11.38	1070
1071		true	tr|F1MME6|F1MME6_BOVIN	Myomesin-1 OS=Bos taurus GN=MYOM1 PE=4 SV=2	3	Carbamyl, Oxidation, Phospho	6.1	174.7	1	109.2 (M:109.2)	2.7	557.92	1071
1072		true	tr|E1BP14|E1BP14_BOVIN	Uncharacterized protein OS=Bos taurus GN=ARHGEF17 PE=4 SV=2	3	Carbamidomethyl, Gln->pyro-Glu, Carbamyl, Oxidation, Phospho	5.9	220.6	1	109.2 (M:109.2)	1.1	929.49	1072
1073		true	tr|F1MNJ2|F1MNJ2_BOVIN	Signal recognition particle receptor subunit alpha OS=Bos taurus GN=SRPR PE=4 SV=1	2	Carbamyl, Oxidation, Phospho	9.0	65.6	2	109.2 (M:109.2)	4.2	666.52	1073
1074		true	tr|E1BJI4|E1BJI4_BOVIN	Uncharacterized protein OS=Bos taurus GN=BTBD11 PE=4 SV=1	4	Carbamidomethyl, Carbamyl, Carboxymethyl, Phospho	6.4	121.3	1	109.1 (M:109.1)	3.7	34988.59	1074
1075		true	tr|F1MTQ0|F1MTQ0_BOVIN	Uncharacterized protein OS=Bos taurus GN=BRWD1 PE=4 SV=2	3	Carbamidomethyl, Carbamyl, Oxidation, Phospho	8.9	262.6	1	109.1 (M:109.1)	1.2	466.14	1075
1076		true	tr|E1BGE2|E1BGE2_BOVIN	Uncharacterized protein OS=Bos taurus GN=UTP20 PE=4 SV=1	4	Carbamyl, Phospho	6.9	318.2	1	109.1 (M:109.1)	1.4	839.83	1076
1077		true	tr|F1MMJ6|F1MMJ6_BOVIN	Uncharacterized protein OS=Bos taurus GN=LRRC16A PE=4 SV=2	2	Carbamidomethyl, Carbamyl, Phospho	7.9	147.3	1	109.1 (M:109.1)	1.4	843.01	1077
1078		true	tr|M5FI09|M5FI09_BOVIN	HCG1658583-like OS=Bos taurus GN=LOC528959 PE=4 SV=1	4	Carbamyl, Oxidation, Phospho	6.0	113.7	1	109.0 (M:109.0)	4.5	764.46	1078
1079		true	tr|E1B885|E1B885_BOVIN	Uncharacterized protein OS=Bos taurus GN=TTC37 PE=4 SV=2	3	Carbamidomethyl, Carbamyl, Carboxymethyl, Phospho	7.1	174.6	3	109.0 (M:109.0)	1.7	17837.95	1079
1080		true	tr|E1BF85|E1BF85_BOVIN	Uncharacterized protein OS=Bos taurus GN=GARNL3 PE=4 SV=1	2	Carbamidomethyl, Carbamyl, Phospho	6.9	115.5	2	108.9 (M:108.9)	2.5	929.26	1080
1081		true	tr|F1MVC0|F1MVC0_BOVIN	Uncharacterized protein OS=Bos taurus GN=CAD PE=3 SV=2	2	Carbamidomethyl, Carbamyl, Carboxymethyl, Phospho	6.2	242.8	1	108.8 (M:108.8)	0.9	21877.39	1081
1082		true	tr|F1MBM1|F1MBM1_BOVIN	Uncharacterized protein OS=Bos taurus GN=HEATR4 PE=4 SV=2	5	Carbamidomethyl, Carbamyl, Carboxymethyl, Oxidation, Phospho	9.2	112.9	1	108.8 (M:108.8)	5.0	23102.12	1082
1083		true	tr|E1BKW9|E1BKW9_BOVIN	Uncharacterized protein OS=Bos taurus GN=SNX19 PE=4 SV=2	4	Carbamyl, Oxidation, Phospho	5.0	108.8	1	108.8 (M:108.8)	2.8	626.48	1083
1084		true	tr|E1BMY9|E1BMY9_BOVIN	Uncharacterized protein OS=Bos taurus GN=WDR64 PE=4 SV=1	3	Carbamyl, Phospho	7.0	123.5	3	108.7 (M:108.7)	3.8	584.69	1084
1085		true	tr|E1BLT3|E1BLT3_BOVIN	Uncharacterized protein OS=Bos taurus GN=SPTBN4 PE=4 SV=1	4	Carbamidomethyl, Carbamyl, Oxidation, Phospho	5.8	288.7	1	108.7 (M:108.7)	1.8	779.65	1085
1086		true	tr|E1BJ37|E1BJ37_BOVIN	Uncharacterized protein OS=Bos taurus GN=SKIL PE=4 SV=1	4	Carbamidomethyl, Gln->pyro-Glu, Carbamyl, Phospho	6.1	77.5	1	108.7 (M:108.7)	8.2	447.99	1086
1087		true	tr|Q5D697|Q5D697_BVDV	N-terminal autoprotease (Fragment) OS=Bovine viral diarrhea virus GN=Npro PE=4 SV=1	2	Carbamyl, Oxidation, Phospho	9.3	19.3	1	108.6 (M:108.6)	8.3	0.93	1087
1088		true	tr|E1BAU6|E1BAU6_BOVIN	Uncharacterized protein OS=Bos taurus GN=INPP5E PE=4 SV=1	3	Carbamidomethyl, Carbamyl, Oxidation, Phospho	9.1	71.9	1	108.5 (M:108.5)	4.3	61.96	1088
1089		true	tr|F1N169|F1N169_BOVIN	Uncharacterized protein OS=Bos taurus GN=FLNA PE=4 SV=2	2	Carbamidomethyl, Carbamyl, Phospho	5.8	281.0	1	108.5 (M:108.5)	1.5	672.93	1089
1090		true	tr|Q30292|Q30292_BOVIN	MHC class 1 (Fragment) OS=Bos taurus GN=HD7 PE=2 SV=1	2	Carbamidomethyl, Carbamyl, Carboxymethyl, Phospho	5.5	39.9	4	108.3 (M:108.3)	6.2	24840.05	1090
1091		true	tr|F1MEG3|F1MEG3_BOVIN	Uncharacterized protein OS=Bos taurus GN=LAMA1 PE=4 SV=2	4	Carbamidomethyl, Carbamyl, Carboxymethyl, Oxidation, Phospho	5.8	330.9	1	108.2 (M:108.2)	1.3	735.55	1091
1092		true	tr|F6PXH4|F6PXH4_BOVIN	Uncharacterized protein OS=Bos taurus GN=C9orf43 PE=4 SV=1	2	Carbamyl, Phospho	9.4	50.5	2	108.1 (M:108.1)	1.6	92.86	1092
1093		true	tr|Q56JZ0|Q56JZ0_BOVIN	GMNN protein OS=Bos taurus GN=GMNN PE=2 SV=1	1	Gln->pyro-Glu, Carbamyl, Oxidation, Phospho	5.4	21.2	1	108.1 (M:108.1)	3.8	1082.04	1093
1094		true	tr|S6CGB4|S6CGB4_BOVIN	Craniofacial development protein 1 OS=Bos taurus GN=Bcnt PE=4 SV=1	3	Carbamyl, Oxidation, Phospho	4.7	29.1	3	107.9 (M:107.9)	10.5	513.34	1094
1095		true	tr|F1MVN6|F1MVN6_BOVIN	Uncharacterized protein (Fragment) OS=Bos taurus GN=GSE1 PE=4 SV=2	1	Carbamyl, Phospho	7.4	133.5	1	107.9 (M:107.9)	0.6	1108.39	1095
1096		true	tr|F1N2A6|F1N2A6_BOVIN	Uncharacterized protein (Fragment) OS=Bos taurus GN=PIEZO2 PE=3 SV=2	3	Carbamyl, Oxidation, Phospho	5.7	300.9	1	107.9 (M:107.9)	1.0	681.59	1096
1097		true	tr|E1BLZ5|E1BLZ5_BOVIN	Uncharacterized protein OS=Bos taurus GN=KDM2B PE=4 SV=1	4	Carbamyl, Oxidation, Phospho, Glu->pyro-Glu	8.6	149.6	1	107.9 (M:107.9)	4.0	336.18	1097
1098		true	tr|E1BPB8|E1BPB8_BOVIN	Uncharacterized protein OS=Bos taurus GN=C14orf39 PE=4 SV=1	1	Carbamidomethyl, Phospho	5.6	68.2	1	107.8 (M:107.8)	1.4	1010.90	1098
1099		true	tr|E1BP11|E1BP11_BOVIN	Uncharacterized protein OS=Bos taurus GN=RFX1 PE=4 SV=2	3	Carbamyl, Phospho	9.1	103.5	1	107.8 (M:107.8)	3.9	65.59	1099
1100		true	tr|F1MJY3|F1MJY3_BOVIN	Uncharacterized protein (Fragment) OS=Bos taurus GN=TET3 PE=4 SV=2	1	Carbamidomethyl, Carbamyl, Carboxymethyl	6.6	180.2	1	107.7 (M:107.7)	0.0	19542.78	1100
1101		true	tr|E1BBY7|E1BBY7_BOVIN	Uncharacterized protein OS=Bos taurus GN=HSPA4 PE=3 SV=2	3	Carbamyl, Oxidation, Phospho	5.1	94.4	1	107.7 (M:107.7)	4.0	337.42	1101
1102		true	tr|F1ML89|F1ML89_BOVIN	Uncharacterized protein OS=Bos taurus GN=CPS1 PE=3 SV=2	2	Carbamyl, Oxidation, Phospho	6.3	164.6	1	107.6 (M:107.6)	1.5	26.87	1102
1103		true	tr|E1BP38|E1BP38_BOVIN	Uncharacterized protein (Fragment) OS=Bos taurus GN=RALGAPA1 PE=4 SV=2	2	Carbamidomethyl, Carbamyl, Carboxymethyl, Oxidation, Phospho, Glu->pyro-Glu	5.6	235.0	1	107.6 (M:107.6)	1.0	515.34	1103
1104		true	sp|Q2HJE1|WDR91_BOVIN	WD repeat-containing protein 91 OS=Bos taurus GN=WDR91 PE=2 SV=2	4	Carbamidomethyl, Carbamyl, Carboxymethyl, Oxidation, Phospho	6.1	83.1	1	107.3 (M:107.3)	5.1	18510.01	1104
1105		true	tr|F1MQ83|F1MQ83_BOVIN	Uncharacterized protein OS=Bos taurus GN=UPF2 PE=4 SV=2	2	Carbamidomethyl, Carbamyl, Carboxymethyl, Oxidation, Phospho	5.5	148.0	2	107.2 (M:107.2)	2.0	29.78	1105
1106		true	tr|F1MP31|F1MP31_BOVIN	Uncharacterized protein OS=Bos taurus GN=GON4L PE=4 SV=1	2	Carbamidomethyl, Carbamyl, Carboxymethyl, Oxidation, Phospho	4.9	246.6	2	107.2 (M:107.2)	1.1	20786.55	1106
1107		true	tr|G3N387|G3N387_BOVIN	Uncharacterized protein (Fragment) OS=Bos taurus GN=C10orf12 PE=4 SV=1	3	Carbamidomethyl, Carbamyl, Carboxymethyl, Phospho	7.3	136.2	1	107.2 (M:107.2)	2.2	26233.26	1107
1108		true	sp|A7MAZ5|H13_BOVIN	Histone H1.3 OS=Bos taurus GN=HIST1H1D PE=1 SV=1	4	Carbamyl, Phospho	11.0	22.1	1	107.1 (M:107.1)	16.3	458.31	1108
1109		true	tr|E1BDP8|E1BDP8_BOVIN	TRAF-type zinc finger domain-containing protein 1 OS=Bos taurus GN=TRAFD1 PE=4 SV=2	3	Carbamidomethyl, Carboxymethyl, Phospho, Glu->pyro-Glu	7.8	64.9	3	107.0 (M:107.0)	3.1	1007.45	1109
1110		true	tr|F1MKC7|F1MKC7_BOVIN	Uncharacterized protein OS=Bos taurus GN=HELZ PE=4 SV=2	3	Carbamyl, Oxidation, Phospho	8.7	217.6	1	107.0 (M:107.0)	1.9	588.99	1110
1111		true	tr|E1B740|E1B740_BOVIN	Uncharacterized protein OS=Bos taurus GN=SNAPC4 PE=4 SV=2	5	Carbamyl, Phospho	7.6	144.6	2	106.9 (M:106.9)	3.7	954.71	1111
1112		true	tr|E1B860|E1B860_BOVIN	Uncharacterized protein OS=Bos taurus GN=IFT140 PE=4 SV=1	3	Carbamidomethyl, Carbamyl, Carboxymethyl, Oxidation, Phospho	5.9	164.5	2	106.9 (M:106.9)	2.7	20134.98	1112
1113		true	tr|M5FI63|M5FI63_BOVIN	Activating transcription factor 7 interacting protein 2-like OS=Bos taurus GN=ATF7IP2 PE=4 SV=1	5	Carbamidomethyl, Carbamyl, Carboxymethyl, Oxidation, Phospho	9.3	50.9	3	106.9 (M:106.9)	9.0	26725.34	1113
1114		true	tr|E1BPM4|E1BPM4_BOVIN	Uncharacterized protein OS=Bos taurus GN=CHD7 PE=4 SV=2	3	Carbamyl, Oxidation, Phospho	6.0	326.7	1	106.8 (M:106.8)	1.0	556.97	1114
1115		true	tr|F1MU45|F1MU45_BOVIN	Uncharacterized protein (Fragment) OS=Bos taurus GN=PCF11 PE=4 SV=2	5	Carbamyl, Phospho, Glu->pyro-Glu	9.2	182.5	1	106.8 (M:106.8)	1.9	1019.78	1115
1116		true	sp|P56965|DDAH1_BOVIN	N(G),N(G)-dimethylarginine dimethylaminohydrolase 1 OS=Bos taurus GN=DDAH1 PE=1 SV=3	5	Gln->pyro-Glu, Carbamyl, Oxidation	5.7	31.3	1	106.8 (M:106.8)	16.8	563.45	1116
1117		true	tr|E1BEE6|E1BEE6_BOVIN	Uncharacterized protein OS=Bos taurus GN=WRN PE=4 SV=2	4	Carbamidomethyl, Carbamyl, Phospho	5.5	159.1	1	106.7 (M:106.7)	3.3	602.49	1117
1118		true	tr|F1MHH5|F1MHH5_BOVIN	Uncharacterized protein (Fragment) OS=Bos taurus GN=CELSR3 PE=4 SV=2	5	Carbamidomethyl, Carbamyl, Carboxymethyl, Oxidation, Phospho	6.2	356.9	1	106.7 (M:106.7)	1.9	18167.23	1118
1119		true	tr|F1MPL1|F1MPL1_BOVIN	Uncharacterized protein (Fragment) OS=Bos taurus GN=MFN1 PE=4 SV=2	2	Carbamyl, Phospho	6.0	85.1	1	106.6 (M:106.6)	2.4	694.38	1119
1120		true	tr|F1MMR2|F1MMR2_BOVIN	Uncharacterized protein (Fragment) OS=Bos taurus GN=FRMD4B PE=4 SV=2	5	Carbamidomethyl, Gln->pyro-Glu, Carboxymethyl, Oxidation, Phospho	8.8	111.8	2	106.6 (M:106.6)	4.4	22772.36	1120
1121		true	tr|F1MDI9|F1MDI9_BOVIN	Uncharacterized protein (Fragment) OS=Bos taurus GN=GBP2 PE=4 SV=2	3	Carbamyl, Oxidation, Phospho	6.2	71.3	2	106.6 (M:106.6)	3.7	491.83	1121
1122		true	tr|E1BPZ7|E1BPZ7_BOVIN	Uncharacterized protein OS=Bos taurus GN=FBXO38 PE=4 SV=2	4	Carbamidomethyl, Carbamyl, Carboxymethyl, Oxidation, Phospho, Glu->pyro-Glu	5.9	133.9	1	106.6 (M:106.6)	3.9	29691.90	1122
1123		true	tr|G3MZF6|G3MZF6_BOVIN	Uncharacterized protein OS=Bos taurus GN=WDR76 PE=4 SV=1	4	Carbamidomethyl, Carbamyl, Carboxymethyl, Oxidation, Phospho	8.9	70.4	3	106.4 (M:106.4)	4.6	743.39	1123
1124		true	tr|G3N019|G3N019_BOVIN	Uncharacterized protein (Fragment) OS=Bos taurus GN=TMEM132C PE=4 SV=1	4	Carbamidomethyl, Carbamyl, Carboxymethyl, Phospho	5.9	119.8	1	106.4 (M:106.4)	7.1	9184.41	1124
1125		true	sp|Q3SZ57|FETA_BOVIN	Alpha-fetoprotein OS=Bos taurus GN=AFP PE=2 SV=1	5	Carbamyl, Oxidation, Phospho	5.9	68.5	1	106.4 (M:106.4)	5.2	665.21	1125
1126		true	tr|A0A0F6N3B3|A0A0F6N3B3_PI3B	RNA-directed RNA polymerase L OS=Bovine parainfluenza 3 virus GN=L PE=3 SV=1	6	Carbamyl, Oxidation, Phospho	6.0	255.7	1	106.3 (M:106.3)	2.7	346.83	1126
1127		true	tr|A6QQC9|A6QQC9_BOVIN	OLFM4 protein (Fragment) OS=Bos taurus GN=OLFM4 PE=2 SV=1	4	Carbamyl, Oxidation	7.0	49.7	2	106.2 (M:106.2)	9.7	457.37	1127
1128		true	tr|G3N0Z0|G3N0Z0_BOVIN	Uncharacterized protein OS=Bos taurus GN=IQCF6 PE=4 SV=1	4	Carbamyl, Oxidation, Phospho	11.8	13.1	1	106.1 (M:106.1)	9.3	398.83	1128
1129		true	tr|E1BIX9|E1BIX9_BOVIN	Keratin, type II cytoskeletal 74 OS=Bos taurus GN=KRT74 PE=4 SV=1	2	Carbamidomethyl, Carbamyl, Oxidation, Phospho	6.2	51.4	2	106.1 (M:106.1)	3.4	15.52	1129
1130		true	tr|E1BE32|E1BE32_BOVIN	Uncharacterized protein OS=Bos taurus GN=NUBPL PE=4 SV=2	1	Gln->pyro-Glu, Carbamyl, Oxidation, Phospho	9.4	35.7	1	106.1 (M:106.1)	3.9	668.71	1130
1131		true	tr|F1N0H5|F1N0H5_BOVIN	Uncharacterized protein OS=Bos taurus GN=ZC3H13 PE=4 SV=1	2	Carbamyl, Oxidation, Phospho	9.5	194.5	1	106.1 (M:106.1)	1.5	756.72	1131
1132		true	sp|Q07722-3|PLCB4_BOVIN	Isoform 2A of 1-phosphatidylinositol 4,5-bisphosphate phosphodiesterase beta-4 OS=Bos taurus GN=PLCB4	3	Carbamyl, Oxidation, Phospho	6.5	103.6	2	106.1 (M:106.1)	3.0	945.04	1132
1133		true	sp|Q0IIH7|ST14_BOVIN	Suppressor of tumorigenicity 14 protein homolog OS=Bos taurus GN=ST14 PE=2 SV=1	3	Carbamidomethyl, Phospho	5.9	94.9	2	106.0 (M:106.0)	6.2	14.80	1133
1134		true	tr|G3MY59|G3MY59_BOVIN	Uncharacterized protein OS=Bos taurus GN=ZNF175 PE=4 SV=1	2	Carbamidomethyl, Carbamyl, Oxidation, Phospho	9.0	75.5	2	106.0 (M:106.0)	2.7	444.89	1134
1135		true	tr|A4FUC8|A4FUC8_BOVIN	CARS protein OS=Bos taurus GN=CARS PE=2 SV=1	3	Carbamyl, Oxidation, Phospho	6.2	94.1	1	105.9 (M:105.9)	2.8	523.58	1135
1136		true	tr|E1B7E1|E1B7E1_BOVIN	Uncharacterized protein OS=Bos taurus GN=TENM4 PE=4 SV=2	2	Carbamyl, Phospho	6.1	307.5	1	105.9 (M:105.9)	0.8	569.96	1136
1137		true	tr|E1B876|E1B876_BOVIN	Uncharacterized protein OS=Bos taurus GN=NCKAP1L PE=4 SV=2	4	Carbamidomethyl, Carbamyl, Carboxymethyl, Oxidation, Phospho	6.3	128.8	1	105.8 (M:105.8)	3.4	687.32	1137
1138		true	tr|F1N7E7|F1N7E7_BOVIN	Uncharacterized protein (Fragment) OS=Bos taurus GN=TSHZ3 PE=4 SV=2	1	Carbamyl, Oxidation, Phospho	6.3	117.8	1	105.7 (M:105.7)	1.1	760.63	1138
1139		true	sp|A5PK21|CKP2L_BOVIN	Cytoskeleton-associated protein 2-like OS=Bos taurus GN=CKAP2L PE=2 SV=1	3	Carbamyl, Oxidation, Phospho, Glu->pyro-Glu	9.8	82.6	1	105.7 (M:105.7)	3.8	558.85	1139
1140		true	tr|E1BIP2|E1BIP2_BOVIN	Uncharacterized protein OS=Bos taurus GN=SLC44A1 PE=4 SV=2	2	Carbamidomethyl, Carbamyl, Carboxymethyl, Oxidation, Phospho	9.3	73.8	1	105.6 (M:105.6)	5.2	585.35	1140
1141		true	tr|F1N428|F1N428_BOVIN	Sodium/nucleoside cotransporter OS=Bos taurus GN=SLC28A2 PE=3 SV=1	2	Carbamidomethyl, Carbamyl, Carboxymethyl, Phospho	8.0	72.3	1	105.6 (M:105.6)	2.6	21.94	1141
1142		true	tr|E1BM66|E1BM66_BOVIN	Histone-lysine N-methyltransferase OS=Bos taurus GN=NSD1 PE=4 SV=2	2	Carbamyl, Phospho	8.4	296.5	1	105.6 (M:105.6)	1.0	476.65	1142
1143		true	tr|F1MRY3|F1MRY3_BOVIN	Uncharacterized protein OS=Bos taurus GN=KIAA1875 PE=4 SV=2	2	Carbamidomethyl, Carbamyl, Carboxymethyl, Oxidation, Phospho, Glu->pyro-Glu	6.8	177.4	1	105.5 (M:105.5)	2.2	21855.29	1143
1144		true	tr|E1BK91|E1BK91_BOVIN	Uncharacterized protein OS=Bos taurus GN=CEP78 PE=4 SV=2	2	Carbamyl, Oxidation, Phospho	8.9	88.6	1	105.5 (M:105.5)	2.1	566.50	1144
1145		true	tr|A7E3V7|A7E3V7_BOVIN	Guanine nucleotide-binding protein, beta-1 subunit (Fragment) OS=Bos taurus GN=GNB1 PE=2 SV=1	2	Carbamidomethyl	5.7	37.0	2	105.5 (M:105.5)	6.8	12.34	1145
1146		true	tr|E1BG60|E1BG60_BOVIN	Uncharacterized protein OS=Bos taurus GN=COL22A1 PE=4 SV=2	4	Carbamyl, Oxidation, Phospho, Glu->pyro-Glu	7.1	161.1	2	105.4 (M:105.4)	2.2	570.76	1146
1147		true	tr|E1BJF6|E1BJF6_BOVIN	Uncharacterized protein OS=Bos taurus GN=SYMPK PE=4 SV=1	5	Oxidation, Phospho	5.7	140.9	1	105.4 (M:105.4)	3.8	743.00	1147
1148		true	tr|A8WA74|A8WA74_BUNSH	L polyprotein OS=Bunyavirus snowshoe hare GN=L PE=4 SV=2	5	Carbamyl, Oxidation, Phospho	6.9	262.5	3	105.3 (M:105.3)	2.3	603.29	1148
1149		true	tr|E1BIV7|E1BIV7_BOVIN	Uncharacterized protein OS=Bos taurus GN=ZFC3H1 PE=4 SV=2	4	Carbamidomethyl, Carbamyl, Phospho	8.5	225.9	1	105.1 (M:105.1)	1.8	484.95	1149
1150		true	tr|F1N4T1|F1N4T1_BOVIN	Uncharacterized protein OS=Bos taurus GN=RFC1 PE=4 SV=2	2	Carbamyl, Oxidation, Phospho, Glu->pyro-Glu	8.7	48.7	1	105.1 (M:105.1)	4.7	440.47	1150
1151		true	tr|A6H797|A6H797_BOVIN	MLEC protein OS=Bos taurus GN=MLEC PE=2 SV=1	2		5.4	31.5	1	105.0 (M:105.0)	10.6	9.37	1151
1152		true	tr|E1BNT5|E1BNT5_BOVIN	Tensin-1 (Fragment) OS=Bos taurus GN=TNS1 PE=4 SV=2	4	Carbamyl, Oxidation, Phospho, Glu->pyro-Glu	7.7	188.7	3	105.0 (M:105.0)	3.4	150.72	1152
1153		true	sp|O46382|BIG1_BOVIN	Brefeldin A-inhibited guanine nucleotide-exchange protein 1 OS=Bos taurus GN=ARFGEF1 PE=1 SV=1	2	Carbamidomethyl, Carbamyl, Oxidation, Phospho	5.5	208.6	2	104.9 (M:104.9)	0.0	230.00	1153
1154		true	tr|F1MFC6|F1MFC6_BOVIN	Uncharacterized protein OS=Bos taurus GN=FARP1 PE=4 SV=2	3	Carbamidomethyl, Gln->pyro-Glu, Carbamyl, Carboxymethyl, Oxidation, Phospho, Glu->pyro-Glu	7.9	118.3	1	104.8 (M:104.8)	2.8	30242.32	1154
1155		true	tr|E1B9R3|E1B9R3_BOVIN	Uncharacterized protein OS=Bos taurus GN=UGGT1 PE=4 SV=2	4	Carbamidomethyl, Carbamyl, Carboxymethyl, Oxidation, Phospho	5.5	177.6	1	104.8 (M:104.8)	2.1	13225.43	1155
1156		true	tr|F1MDD5|F1MDD5_BOVIN	Uncharacterized protein (Fragment) OS=Bos taurus GN=LAMA3 PE=4 SV=2	2	Carbamyl, Oxidation, Phospho	6.4	356.9	1	104.6 (M:104.6)	0.5	794.54	1156
1157		true	tr|F6R1L1|F6R1L1_BOVIN	Uncharacterized protein OS=Bos taurus GN=SMEK1 PE=4 SV=1	4	Carbamyl, Oxidation, Phospho	4.8	93.8	3	104.6 (M:104.6)	5.1	304.52	1157
1158		true	tr|F1MRG4|F1MRG4_BOVIN	Uncharacterized protein (Fragment) OS=Bos taurus PE=4 SV=2	3	Carbamyl, Phospho	9.4	153.1	1	104.5 (M:104.5)	2.3	652.49	1158
1159		true	tr|F1MHR5|F1MHR5_BOVIN	Uncharacterized protein (Fragment) OS=Bos taurus GN=ZMYM4 PE=4 SV=1	5	Carbamyl, Phospho	6.5	169.5	1	104.5 (M:104.5)	3.0	604.94	1159
1160		true	tr|G3N3R5|G3N3R5_BOVIN	Uncharacterized protein OS=Bos taurus GN=GOLIM4 PE=4 SV=1	5	Gln->pyro-Glu, Glu->pyro-Glu	4.7	77.4	3	104.4 (M:104.4)	2.9	827.00	1160
1161		true	tr|E1BJB4|E1BJB4_BOVIN	Uncharacterized protein OS=Bos taurus GN=RPGRIP1L PE=4 SV=2	4	Carbamidomethyl, Carbamyl, Carboxymethyl, Oxidation, Phospho	5.4	146.8	1	104.4 (M:104.4)	3.0	40600.75	1161
1162		true	tr|E1B7Z5|E1B7Z5_BOVIN	Uncharacterized protein OS=Bos taurus GN=LOC615782 PE=4 SV=2	4	Carbamidomethyl, Carbamyl, Carboxymethyl, Oxidation, Phospho	9.0	75.9	1	104.4 (M:104.4)	4.9	15215.13	1162
1163		true	tr|E1BDF8|E1BDF8_BOVIN	Uncharacterized protein OS=Bos taurus GN=REXO1 PE=4 SV=2	4	Carbamidomethyl, Carbamyl, Carboxymethyl, Phospho	8.9	130.2	1	104.3 (M:104.3)	4.0	20790.33	1163
1164		true	tr|E1BC86|E1BC86_BOVIN	Uncharacterized protein OS=Bos taurus GN=PKD1 PE=4 SV=1	5	Carbamidomethyl, Carbamyl, Phospho	6.1	459.5	1	104.3 (M:104.3)	1.5	709.95	1164
1165		true	tr|F1MYQ7|F1MYQ7_BOVIN	Uncharacterized protein (Fragment) OS=Bos taurus GN=FRY PE=4 SV=2	5	Carbamyl, Oxidation, Phospho, Glu->pyro-Glu	5.6	338.5	1	104.3 (M:104.3)	1.9	678.63	1165
1166		true	sp|A6QLI0|EPDR1_BOVIN	Mammalian ependymin-related protein 1 OS=Bos taurus GN=EPDR1 PE=2 SV=1	3	Carbamyl, Phospho	8.0	26.5	1	104.3 (M:104.3)	14.0	29.98	1166
1167		true	sp|Q9BDI7|MX2_BOVIN	Interferon-induced GTP-binding protein Mx2 OS=Bos taurus GN=MX2 PE=2 SV=1	4	Carbamyl, Phospho, Glu->pyro-Glu	6.4	81.4	2	104.3 (M:104.3)	5.6	241.26	1167
1168		true	tr|F1N319|F1N319_BOVIN	Rho-associated protein kinase 2 (Fragment) OS=Bos taurus GN=ROCK2 PE=4 SV=2	3	Carbamidomethyl, Carbamyl, Carboxymethyl, Oxidation, Phospho, Glu->pyro-Glu	5.7	155.8	2	104.2 (M:104.2)	1.9	27161.11	1168
1169		true	sp|Q5EA61|KCRB_BOVIN	Creatine kinase B-type OS=Bos taurus GN=CKB PE=1 SV=1	3	Phospho	5.5	42.7	1	104.2 (M:104.2)	5.5	447.57	1169
1170		true	tr|Q0V8K9|Q0V8K9_BOVIN	Solute carrier family 29 (Nucleoside transporters), member 1 (Fragment) OS=Bos taurus GN=SLC29A1 PE=2 SV=1	3		8.7	49.2	2	104.2 (M:104.2)	9.8	11.03	1170
1171		true	sp|P16368|TIMP2_BOVIN	Metalloproteinase inhibitor 2 OS=Bos taurus GN=TIMP2 PE=1 SV=2	2	Carbamidomethyl	7.4	24.3	3	104.2 (M:104.2)	10.0	10.15	1171
1172		true	tr|F1N3H1|F1N3H1_BOVIN	Calumenin OS=Bos taurus GN=CALU PE=1 SV=1	3	Oxidation	4.4	37.1	2	104.1 (M:104.1)	10.8	857.28	1172
1173		true	tr|A5D7D5|A5D7D5_BOVIN	MATN2 protein OS=Bos taurus GN=MATN2 PE=2 SV=1	5	Carbamidomethyl, Gln->pyro-Glu, Carbamyl, Carboxymethyl, Oxidation, Phospho	6.6	106.8	2	104.0 (M:104.0)	5.4	35796.77	1173
1174		true	sp|Q8B0H0|L_VSIVC	RNA-directed RNA polymerase L OS=Vesicular stomatitis Indiana virus (strain 94GUB Central America) GN=L PE=3 SV=1	2	Carbamyl, Oxidation, Phospho	8.7	240.8	3	104.0 (M:104.0)	0.0	363.06	1174
1175		true	tr|A6QP33|A6QP33_BOVIN	ZMYM6 protein (Fragment) OS=Bos taurus GN=ZMYM6 PE=2 SV=1	3	Carbamidomethyl, Carbamyl, Carboxymethyl, Phospho	8.9	107.6	2	103.9 (M:103.9)	3.7	23363.68	1175
1176		true	tr|G3MZF7|G3MZF7_BOVIN	Uncharacterized protein OS=Bos taurus GN=UBFD1 PE=4 SV=1	6	Carbamidomethyl, Carbamyl, Carboxymethyl, Oxidation, Phospho	5.7	33.1	2	103.9 (M:103.9)	13.1	25575.31	1176
1177		true	tr|G3MZU6|G3MZU6_BOVIN	Uncharacterized protein (Fragment) OS=Bos taurus GN=IGFN1 PE=4 SV=1	2	Carbamyl, Oxidation, Phospho	8.6	266.9	1	103.8 (M:103.8)	0.6	1126.72	1177
1178		true	tr|F1MHB3|F1MHB3_BOVIN	Uncharacterized protein (Fragment) OS=Bos taurus GN=SETBP1 PE=4 SV=1	5	Carbamidomethyl, Carbamyl, Carboxymethyl, Oxidation, Phospho	9.9	155.4	1	103.8 (M:103.8)	4.0	10918.46	1178
1179		true	tr|A0A0F6N3I4|A0A0F6N3I4_PI3B	Phosphoprotein OS=Bovine parainfluenza 3 virus GN=C PE=4 SV=1	2	Carbamyl, Phospho, Glu->pyro-Glu	5.6	67.6	12	103.7 (M:103.7)	4.5	644.33	1179
1180		true	tr|G0XUZ6|G0XUZ6_COWPX	Ankyrin repeat-containing protein OS=Cowpox virus GN=CPXV_GER1980_EP4_004 PE=4 SV=1	2	Carbamyl, Oxidation, Phospho	7.6	70.0	4	103.6 (M:103.6)	3.4	397.37	1180
1181		true	tr|F1MPZ9|F1MPZ9_BOVIN	Uncharacterized protein (Fragment) OS=Bos taurus GN=NCKAP1 PE=4 SV=2	2	Oxidation, Phospho, Glu->pyro-Glu	6.0	124.8	1	103.6 (M:103.6)	2.3	413.22	1181
1182		true	tr|F1MC63|F1MC63_BOVIN	Uncharacterized protein OS=Bos taurus GN=EXOC1 PE=4 SV=2	4	Gln->pyro-Glu, Carbamyl, Oxidation, Phospho	6.1	102.8	2	103.5 (M:103.5)	4.6	561.80	1182
1183		true	tr|A4IFB3|A4IFB3_BOVIN	PLIN protein OS=Bos taurus GN=PLIN PE=2 SV=1	4	Carbamyl, Phospho	6.1	55.0	1	103.4 (M:103.4)	7.8	802.25	1183
1184		true	tr|A4D7S3|A4D7S3_BOVIN	Cortactin-binding protein 2 (Fragment) OS=Bos taurus GN=CORTBP2 PE=4 SV=1	3	Carbamidomethyl, Carbamyl, Phospho	8.3	171.2	2	103.3 (M:103.3)	1.5	849.68	1184
1185		true	tr|F1MC70|F1MC70_BOVIN	Uncharacterized protein (Fragment) OS=Bos taurus GN=CCDC170 PE=4 SV=2	2	Carbamyl, Oxidation, Phospho	6.5	80.1	3	103.3 (M:103.3)	3.3	671.08	1185
1186		true	sp|Q0P5H7|SYRM_BOVIN	Probable arginine--tRNA ligase, mitochondrial OS=Bos taurus GN=RARS2 PE=2 SV=1	4	Carbamyl, Oxidation, Phospho	7.3	65.6	1	103.3 (M:103.3)	5.4	651.51	1186
1187		true	tr|E1B6Z5|E1B6Z5_BOVIN	Uncharacterized protein OS=Bos taurus GN=CCNT2 PE=3 SV=2	4	Carbamidomethyl, Carbamyl, Oxidation, Phospho, Glu->pyro-Glu	9.1	81.3	1	103.2 (M:103.2)	6.6	856.91	1187
1188		true	tr|F1MWN3|F1MWN3_BOVIN	Uncharacterized protein OS=Bos taurus GN=NID1 PE=4 SV=2	3	Carbamidomethyl, Carbamyl, Phospho	5.9	135.5	2	103.2 (M:103.2)	3.0	437.86	1188
1189		true	tr|Q6QRN7|Q6QRN7_BOVIN	PP1201 protein OS=Bos taurus GN=RECS1 PE=2 SV=1	1		8.6	33.9	1	103.0 (M:103.0)	4.5	13.58	1189
1190		true	tr|E1BJ16|E1BJ16_BOVIN	Uncharacterized protein OS=Bos taurus GN=MUM1L1 PE=4 SV=2	2	Carbamyl, Oxidation, Phospho	4.9	79.2	1	103.0 (M:103.0)	1.9	609.24	1190
1191		true	tr|F1MIY4|F1MIY4_BOVIN	Uncharacterized protein (Fragment) OS=Bos taurus GN=GAS2L3 PE=4 SV=2	1	Carbamidomethyl, Carbamyl, Carboxymethyl, Oxidation, Phospho	9.6	74.9	1	102.9 (M:102.9)	1.2	55515.35	1191
1192		true	tr|E1BJG8|E1BJG8_BOVIN	Uncharacterized protein OS=Bos taurus GN=CCDC68 PE=4 SV=2	3	Carbamidomethyl, Carbamyl, Phospho	8.3	38.9	1	102.7 (M:102.7)	10.9	263.02	1192
1193		true	tr|Q95103|Q95103_BOVIN	12-lipoxygenase (Fragment) OS=Bos taurus PE=2 SV=1	3	Carbamidomethyl, Carbamyl, Oxidation	6.4	63.2	2	102.7 (M:102.7)	2.3	887.78	1193
1194		true	tr|F1MM72|F1MM72_BOVIN	Uncharacterized protein (Fragment) OS=Bos taurus GN=ARHGAP22 PE=4 SV=2	4	Carbamyl, Oxidation, Phospho, Glu->pyro-Glu	6.1	65.5	1	102.5 (M:102.5)	1.5	602.23	1194
1195		true	tr|G3N2D0|G3N2D0_BOVIN	Uncharacterized protein OS=Bos taurus GN=ZNF469 PE=4 SV=1	1	Carbamyl, Phospho	8.8	368.1	1	102.5 (M:102.5)	0.2	1006.72	1195
1196		true	tr|F1MLY7|F1MLY7_BOVIN	Uncharacterized protein (Fragment) OS=Bos taurus GN=ATR PE=4 SV=2	2	Carbamyl, Oxidation, Phospho, Glu->pyro-Glu	7.2	299.5	1	102.5 (M:102.5)	1.0	753.58	1196
1197		true	sp|Q1JQD4|GIPC2_BOVIN	PDZ domain-containing protein GIPC2 OS=Bos taurus GN=GIPC2 PE=2 SV=1	4	Carbamyl, Oxidation, Phospho	5.8	34.5	1	102.4 (M:102.4)	15.3	555.75	1197
1198		true	tr|F1MD05|F1MD05_BOVIN	Uncharacterized protein (Fragment) OS=Bos taurus GN=EPB41L4B PE=4 SV=1	3	Carbamidomethyl, Carbamyl, Carboxymethyl, Phospho	9.1	89.9	1	102.4 (M:102.4)	3.2	21475.04	1198
1199		true	tr|F1MUM9|F1MUM9_BOVIN	Uncharacterized protein (Fragment) OS=Bos taurus GN=ADAR PE=1 SV=2	1	Carbamidomethyl, Carbamyl, Carboxymethyl, Oxidation, Phospho	9.0	130.4	1	102.3 (M:102.3)	0.6	56.21	1199
1200		true	tr|F1MKS9|F1MKS9_BOVIN	Uncharacterized protein OS=Bos taurus GN=TYW5 PE=4 SV=2	4	Carbamyl, Oxidation, Phospho	6.7	36.5	1	102.3 (M:102.3)	14.3	436.39	1200
1201		true	sp|Q5KR48-2|TPM2_BOVIN	Isoform 2 of Tropomyosin beta chain OS=Bos taurus GN=TPM2	2	Phospho	4.6	33.0	2	102.3 (M:102.3)	7.0	41.43	1201
1202		true	tr|F1N6I9|F1N6I9_BOVIN	Uncharacterized protein (Fragment) OS=Bos taurus GN=TRIOBP PE=4 SV=2	2	Carbamyl, Phospho	8.7	219.6	2	102.2 (M:102.2)	0.4	97.92	1202
1203		true	tr|F1MHP1|F1MHP1_BOVIN	Uncharacterized protein OS=Bos taurus GN=U2SURP PE=4 SV=1	2	Carbamidomethyl, Carbamyl, Oxidation, Phospho, Glu->pyro-Glu	8.9	118.9	2	102.2 (M:102.2)	1.6	60.08	1203
1204		true	tr|E1B7R4|E1B7R4_BOVIN	Eukaryotic translation initiation factor 3 subunit A OS=Bos taurus GN=EIF3A PE=3 SV=2	3	Carbamyl, Oxidation	6.3	166.2	2	102.1 (M:102.1)	1.9	824.46	1204
1205		true	sp|P0C6R3|EST4A_BOVIN	Carboxylesterase 4A OS=Bos taurus GN=CES4A PE=2 SV=1	3	Carbamyl, Oxidation, Phospho, Glu->pyro-Glu	8.9	61.7	1	102.1 (M:102.1)	3.1	857.00	1205
1206		true	tr|F1MKA9|F1MKA9_BOVIN	Uncharacterized protein OS=Bos taurus GN=TP63 PE=3 SV=2	2	Carbamidomethyl, Carbamyl, Carboxymethyl, Oxidation, Phospho	6.2	76.7	1	102.1 (M:102.1)	2.8	965.85	1206
1207		true	tr|G0XUW9|G0XUW9_COWPX	Ankyrin repeat-containing protein OS=Cowpox virus GN=CPXV198 PE=4 SV=1	5	Carbamyl, Oxidation, Phospho	6.7	65.1	8	102.0 (M:102.0)	5.4	922.10	1207
1208		true	tr|F1MHZ3|F1MHZ3_BOVIN	Uncharacterized protein (Fragment) OS=Bos taurus GN=NPAT PE=4 SV=1	2	Carbamyl, Oxidation, Glu->pyro-Glu	5.6	154.4	1	101.9 (M:101.9)	1.1	843.59	1208
1209		true	tr|E1BPI7|E1BPI7_BOVIN	Uncharacterized protein OS=Bos taurus GN=MON2 PE=4 SV=2	3	Carbamidomethyl, Carbamyl, Carboxymethyl, Oxidation	5.8	190.0	1	101.9 (M:101.9)	1.5	28849.92	1209
1210		true	tr|E1BB26|E1BB26_BOVIN	Uncharacterized protein OS=Bos taurus GN=HEATR5B PE=4 SV=2	3	Carbamyl, Oxidation, Phospho	6.7	224.1	1	101.8 (M:101.8)	1.9	932.94	1210
1211		true	tr|F1N3S5|F1N3S5_BOVIN	Ubiquitin carboxyl-terminal hydrolase OS=Bos taurus GN=USP32 PE=3 SV=2	5	Carbamidomethyl, Carbamyl, Oxidation, Phospho	6.3	174.1	1	101.8 (M:101.8)	4.2	623.93	1211
1212		true	tr|A8E4L8|A8E4L8_BOVIN	LMO7 protein OS=Bos taurus GN=LMO7 PE=2 SV=1	3	Carbamyl, Phospho	8.1	157.5	1	101.8 (M:101.8)	2.1	457.06	1212
1213		true	sp|Q2TBK2-2|RM09_BOVIN	Isoform 2 of 39S ribosomal protein L9, mitochondrial OS=Bos taurus GN=MRPL9	2	Carbamidomethyl, Carbamyl, Carboxymethyl, Oxidation, Phospho	10.1	26.3	3	101.7 (M:101.7)	9.5	24048.49	1213
1214		true	tr|E1BJR7|E1BJR7_BOVIN	Uncharacterized protein (Fragment) OS=Bos taurus GN=PTPN4 PE=4 SV=2	2	Carbamyl, Oxidation, Phospho	6.9	91.3	1	101.7 (M:101.7)	1.9	737.76	1214
1215		true	tr|A2T009|A2T009_RVFV	NP OS=Rift valley fever virus GN=NP PE=4 SV=1	2	Carbamyl, Oxidation, Phospho	9.2	27.4	33	101.7 (M:101.7)	5.7	1255.45	1215
1216		true	tr|A4FUD7|A4FUD7_BOVIN	RAB33B protein OS=Bos taurus GN=RAB33B PE=2 SV=1	2	Carbamidomethyl, Carboxymethyl, Phospho	7.1	25.6	1	101.7 (M:101.7)	11.8	19818.88	1216
1217		true	tr|F1MLS3|F1MLS3_BOVIN	Phosphoinositide phospholipase C OS=Bos taurus GN=PLCL1 PE=4 SV=2	4	Carbamidomethyl, Carbamyl, Carboxymethyl, Oxidation, Phospho	5.5	122.8	1	101.6 (M:101.6)	4.9	35848.26	1217
1218		true	sp|Q0V8M0|KRI1_BOVIN	Protein KRI1 homolog OS=Bos taurus GN=KRI1 PE=2 SV=3	3	Carbamidomethyl, Carbamyl, Carboxymethyl, Oxidation, Phospho	5.1	82.5	3	101.5 (M:101.5)	3.1	24486.36	1218
1219		true	tr|F1MU08|F1MU08_BOVIN	Poly [ADP-ribose] polymerase 1 OS=Bos taurus GN=PARP1 PE=4 SV=2	3	Carbamyl, Oxidation, Phospho	9.0	113.3	3	101.4 (M:101.4)	2.9	23.77	1219
1220		true	tr|F1MD43|F1MD43_BOVIN	Mothers against decapentaplegic homolog OS=Bos taurus GN=SMAD5 PE=3 SV=2	3	Carbamidomethyl, Carbamyl, Phospho	7.6	52.2	2	101.4 (M:101.4)	6.9	330.19	1220
1221		true	tr|F1MIH8|F1MIH8_BOVIN	Uncharacterized protein (Fragment) OS=Bos taurus PE=4 SV=2	2	Carbamidomethyl, Carbamyl, Oxidation, Phospho	8.8	208.3	3	101.3 (M:101.3)	1.1	733.96	1221
1222		true	tr|A5D7R2|A5D7R2_BOVIN	NOC3L protein OS=Bos taurus GN=NOC3L PE=2 SV=1	3	Carbamyl, Phospho	9.2	92.3	2	101.3 (M:101.3)	1.8	699.68	1222
1223		true	tr|F1MC90|F1MC90_BOVIN	Uncharacterized protein OS=Bos taurus GN=ZNF106 PE=4 SV=2	3	Carbamidomethyl, Carbamyl, Carboxymethyl, Oxidation, Phospho	6.6	211.4	1	101.2 (M:101.2)	1.9	16665.43	1223
1224		true	tr|E1BIU6|E1BIU6_BOVIN	Uncharacterized protein OS=Bos taurus GN=PPP2R3A PE=4 SV=2	1	Carbamidomethyl, Carbamyl, Carboxymethyl, Phospho	5.0	130.0	1	101.2 (M:101.2)	1.2	30422.96	1224
1225		true	tr|G3MYU2|G3MYU2_BOVIN	Uncharacterized protein OS=Bos taurus GN=KRT77 PE=3 SV=1	2	Glu->pyro-Glu	6.5	61.1	1	101.1 (M:101.1)	3.7	30.71	1225
1226		true	tr|F1MD64|F1MD64_BOVIN	Uncharacterized protein (Fragment) OS=Bos taurus GN=PIEZO1 PE=3 SV=2	4	Carbamyl, Oxidation, Phospho	9.2	285.5	1	101.1 (M:101.1)	1.3	832.15	1226
1227		true	tr|A6QR15|A6QR15_BOVIN	LOC535277 protein OS=Bos taurus GN=LOC535277 PE=2 SV=1	2	Carbamyl, Phospho	4.7	32.8	1	101.1 (M:101.1)	6.3	9.94	1227
1228		true	tr|G3X6R4|G3X6R4_BOVIN	Uncharacterized protein (Fragment) OS=Bos taurus GN=CXorf22 PE=4 SV=1	5	Carbamyl, Oxidation, Phospho	9.0	109.2	1	101.1 (M:101.1)	4.0	688.29	1228
1229		true	tr|F1MHI6|F1MHI6_BOVIN	Uncharacterized protein (Fragment) OS=Bos taurus GN=PRICKLE2 PE=4 SV=2	5	Gln->pyro-Glu, Carbamyl, Oxidation, Phospho	7.7	96.9	1	100.9 (M:100.9)	6.8	446.48	1229
1230		true	sp|Q2TBX6|PSB1_BOVIN	Proteasome subunit beta type-1 OS=Bos taurus GN=PSMB1 PE=1 SV=1	3	Carbamyl, Oxidation, Phospho	8.3	26.2	2	100.8 (M:100.8)	14.5	259.40	1230
1231		true	tr|Q0NPP5|Q0NPP5_COWPX	Ankyrin-like protein OS=Cowpox virus GN=CPXV_GER91_3_185 PE=4 SV=1	4	Carbamyl, Oxidation, Phospho	6.4	65.1	7	100.8 (M:100.8)	4.5	445.52	1231
1232		true	tr|F6Q234|F6Q234_BOVIN	Uncharacterized protein OS=Bos taurus GN=PEPD PE=3 SV=1	5	Carbamidomethyl, Carbamyl, Oxidation, Phospho	5.7	54.8	2	100.7 (M:100.7)	13.8	54.08	1232
1233		true	tr|M5FJT7|M5FJT7_BOVIN	N-acetylglucosamine-1-phosphotransferase subunit gamma OS=Bos taurus GN=GNPTG PE=4 SV=1	2		5.9	31.4	2	100.7 (M:100.7)	12.5	10.94	1233
1234		true	tr|A6QLB7|A6QLB7_BOVIN	Adenylyl cyclase-associated protein 1 OS=Bos taurus GN=CAP1 PE=2 SV=1	2		7.2	51.2	2	100.7 (M:100.7)	7.6	11.56	1234
1235		true	tr|Q683R8|Q683R8_BUBBU	Cathelicidin OS=Bubalus bubalis GN=cath PE=2 SV=1	2	Carbamidomethyl	7.6	16.2	1	100.7 (M:100.7)	13.9	501.35	1235
1236		true	tr|E1BIR9|E1BIR9_BOVIN	Uncharacterized protein OS=Bos taurus GN=SARM1 PE=4 SV=2	2	Carbamidomethyl, Carbamyl, Phospho	6.2	80.4	2	100.6 (M:100.6)	1.5	35.07	1236
1237		true	tr|F1MRM9|F1MRM9_BOVIN	Uncharacterized protein (Fragment) OS=Bos taurus GN=EVI5 PE=4 SV=2	3	Carbamidomethyl, Carboxymethyl, Oxidation, Phospho	5.7	94.1	1	100.6 (M:100.6)	4.0	15652.15	1237
1238		true	tr|A6QL81|A6QL81_BOVIN	DKK3 protein OS=Bos taurus GN=DKK3 PE=2 SV=1	2		4.5	38.4	1	100.5 (M:100.5)	7.4	12.32	1238
1239		true	tr|Q8QMS9|Q8QMS9_COWPX	Ati or CPXV158 protein OS=Cowpox virus GN=ati PE=4 SV=1	2	Carbamyl, Oxidation, Phospho	5.1	150.2	8	100.4 (M:100.4)	1.8	751.89	1239
1240		true	sp|F1N152|HTRA1_BOVIN	Serine protease HTRA1 OS=Bos taurus GN=HTRA1 PE=2 SV=1	4	Carbamidomethyl, Phospho	8.1	51.9	1	100.4 (M:100.4)	8.4	34.40	1240
1241		true	sp|Q28156|PDE5A_BOVIN	cGMP-specific 3',5'-cyclic phosphodiesterase OS=Bos taurus GN=PDE5A PE=1 SV=1	3	Carbamidomethyl, Carbamyl, Oxidation, Phospho	5.6	98.6	1	100.3 (M:100.3)	3.7	466.27	1241
1242		true	tr|G1K1V2|G1K1V2_BOVIN	Guanine nucleotide-binding protein G(s) subunit alpha isoforms short (Fragment) OS=Bos taurus GN=GNAS PE=4 SV=2	3		5.3	38.7	5	100.3 (M:100.3)	10.5	11.31	1242
1243		true	tr|F1MJJ1|F1MJJ1_BOVIN	Uncharacterized protein (Fragment) OS=Bos taurus GN=DPY19L4 PE=4 SV=1	4	Carbamyl, Oxidation, Phospho, Glu->pyro-Glu	8.5	83.7	1	100.3 (M:100.3)	3.7	473.85	1243
1244		true	tr|F1MB66|F1MB66_BOVIN	Uncharacterized protein (Fragment) OS=Bos taurus GN=C2orf78 PE=4 SV=2	3	Carbamidomethyl, Carbamyl, Carboxymethyl, Oxidation, Phospho, Glu->pyro-Glu	9.2	93.6	1	100.3 (M:100.3)	3.6	354.68	1244
1245		true	tr|E1BC50|E1BC50_BOVIN	Uncharacterized protein OS=Bos taurus GN=ADAMTS3 PE=4 SV=2	3	Carbamyl, Oxidation, Phospho	6.3	135.5	1	100.2 (M:100.2)	3.1	300.37	1245
1246		true	tr|E1B9H5|E1B9H5_BOVIN	Uncharacterized protein OS=Bos taurus GN=TGFBR3 PE=4 SV=2	2	Carbamidomethyl, Oxidation, Phospho, Glu->pyro-Glu	5.8	89.7	1	100.2 (M:100.2)	3.3	470.76	1246
1247		true	tr|F1MWK1|F1MWK1_BOVIN	Uncharacterized protein (Fragment) OS=Bos taurus GN=TRPM6 PE=4 SV=2	4	Carbamyl, Oxidation, Phospho	8.6	231.2	1	100.1 (M:100.1)	2.8	281.33	1247
1248		true	tr|E1BGM1|E1BGM1_BOVIN	Uncharacterized protein OS=Bos taurus GN=ZNF451 PE=4 SV=2	1	Carbamidomethyl, Carbamyl, Carboxymethyl, Phospho	6.6	119.0	1	100.1 (M:100.1)	1.8	24135.64	1248
1249		true	tr|F1N312|F1N312_BOVIN	Uncharacterized protein OS=Bos taurus GN=ZNF608 PE=4 SV=2	4	Carbamidomethyl, Gln->pyro-Glu, Carbamyl, Carboxymethyl, Phospho	8.9	161.9	1	100.1 (M:100.1)	2.0	976.25	1249
1250		true	tr|E1BD12|E1BD12_BOVIN	Uncharacterized protein OS=Bos taurus GN=VWA5B2 PE=4 SV=2	1	Carbamyl	6.0	132.9	1	100.0 (M:100.0)	0.0	58.13	1250
1251		true	tr|Q58HC3|Q58HC3_BOVIN	Potassium voltage-gated channel, shaker-related subfamily, beta member 2, transcript variant 2 OS=Bos taurus GN=KCNAB2 PE=2 SV=1	3	Carbamyl, Phospho	8.8	39.2	4	99.9 (M:99.9)	9.1	439.86	1251
1252		true	tr|F1MKU9|F1MKU9_BOVIN	Uncharacterized protein OS=Bos taurus GN=TCERG1 PE=4 SV=2	2	Carbamyl, Oxidation, Phospho, Glu->pyro-Glu	8.7	120.2	2	99.9 (M:99.9)	1.8	934.33	1252
1253		true	tr|F1MRV0|F1MRV0_BOVIN	Uncharacterized protein (Fragment) OS=Bos taurus GN=RALGAPA1 PE=4 SV=1	3	Carbamidomethyl, Carbamyl, Oxidation, Phospho	6.1	134.4	1	99.8 (M:99.8)	2.8	585.17	1253
1254		true	tr|F1MI25|F1MI25_BOVIN	Uncharacterized protein (Fragment) OS=Bos taurus GN=HIVEP1 PE=4 SV=2	3	Carbamyl, Oxidation, Phospho, Glu->pyro-Glu	8.3	283.8	1	99.8 (M:99.8)	1.4	32.96	1254
1255		true	tr|E1BHB6|E1BHB6_BOVIN	Uncharacterized protein OS=Bos taurus GN=FAM205A PE=4 SV=2	5	Carbamidomethyl, Gln->pyro-Glu, Carbamyl, Carboxymethyl, Oxidation, Phospho	7.9	148.2	1	99.8 (M:99.8)	4.6	13454.27	1255
1256		true	tr|F1MZ01|F1MZ01_BOVIN	Uncharacterized protein OS=Bos taurus GN=KIAA1009 PE=4 SV=2	1	Carbamyl, Oxidation, Phospho, Glu->pyro-Glu	5.4	161.2	1	99.6 (M:99.6)	0.0	748.52	1256
1257		true	tr|A4IFB8|A4IFB8_BOVIN	IPO4 protein OS=Bos taurus GN=IPO4 PE=2 SV=1	4	Carbamyl, Oxidation	5.0	118.2	1	99.6 (M:99.6)	1.8	572.32	1257
1258		true	tr|A6QPA6|A6QPA6_BOVIN	MYH3 protein OS=Bos taurus GN=MYH3 PE=2 SV=1	3	Carbamidomethyl, Carbamyl, Carboxymethyl, Oxidation, Phospho, Glu->pyro-Glu	5.6	223.5	3	99.6 (M:99.6)	0.9	917.02	1258
1259		true	sp|A4FUB0|CE034_BOVIN	Uncharacterized protein C5orf34 homolog OS=Bos taurus PE=2 SV=1	2	Carbamidomethyl, Gln->pyro-Glu, Carbamyl, Phospho	8.3	72.8	1	99.6 (M:99.6)	2.7	515.14	1259
1260		true	sp|O46406|AOCY_BOVIN	Primary amine oxidase, lung isozyme OS=Bos taurus PE=2 SV=1	4	Carbamyl, Phospho	5.8	84.8	5	99.6 (M:99.6)	7.9	554.30	1260
1261		true	tr|G3N2B1|G3N2B1_BOVIN	Uncharacterized protein (Fragment) OS=Bos taurus GN=PHLPP1 PE=4 SV=1	3	Gln->pyro-Glu, Carbamyl, Phospho	5.6	128.1	1	99.5 (M:99.5)	2.3	889.22	1261
1262		true	sp|Q2KIY1|PXMP2_BOVIN	Peroxisomal membrane protein 2 OS=Bos taurus GN=PXMP2 PE=2 SV=3	1	Carbamidomethyl, Carbamyl, Carboxymethyl, Phospho, Glu->pyro-Glu	10.2	22.2	1	99.5 (M:99.5)	7.1	32983.58	1262
1263		true	tr|F1MIU5|F1MIU5_BOVIN	Supervillin (Fragment) OS=Bos taurus GN=SVIL PE=4 SV=2	2	Carbamyl, Oxidation	8.6	174.0	4	99.3 (M:99.3)	1.0	621.07	1263
1264		true	tr|F1MHU9|F1MHU9_BOVIN	Uncharacterized protein OS=Bos taurus GN=CNOT1 PE=4 SV=2	2	Carbamidomethyl, Carbamyl, Carboxymethyl, Phospho	6.6	266.1	2	99.3 (M:99.3)	0.9	39.75	1264
1265		true	tr|E1BNN5|E1BNN5_BOVIN	Kinesin-like protein OS=Bos taurus GN=KIF27 PE=3 SV=1	2	Carbamidomethyl, Carbamyl, Phospho	6.5	159.5	1	99.3 (M:99.3)	2.0	364.44	1265
1266		true	tr|F1MM49|F1MM49_BOVIN	Uncharacterized protein OS=Bos taurus GN=RALGAPA2 PE=4 SV=2	3	Carbamyl, Oxidation, Phospho	5.8	201.8	2	99.2 (M:99.2)	0.9	611.71	1266
1267		true	tr|F1MQH8|F1MQH8_BOVIN	Uncharacterized protein OS=Bos taurus GN=RABEP1 PE=4 SV=1	2	Carbamyl, Oxidation, Phospho, Glu->pyro-Glu	5.0	99.5	2	99.2 (M:99.2)	1.5	58.85	1267
1268		true	sp|Q3MHE4|MSH2_BOVIN	DNA mismatch repair protein Msh2 OS=Bos taurus GN=MSH2 PE=2 SV=1	4	Carbamyl, Phospho	5.6	104.9	1	99.1 (M:99.1)	4.2	696.23	1268
1269		true	tr|E1BNH7|E1BNH7_BOVIN	Histone-lysine N-methyltransferase OS=Bos taurus GN=WHSC1L1 PE=4 SV=2	2	Carbamyl, Oxidation, Phospho	8.5	161.0	3	99.1 (M:99.1)	0.5	17.93	1269
1270		true	tr|F1MQQ8|F1MQQ8_BOVIN	Uncharacterized protein OS=Bos taurus GN=PPFIBP1 PE=4 SV=1	1	Carbamyl, Oxidation, Phospho	5.3	113.5	1	99.0 (M:99.0)	0.0	409.39	1270
1271		true	tr|F1N7C1|F1N7C1_BOVIN	Uncharacterized protein OS=Bos taurus GN=HERC6 PE=4 SV=2	4	Carbamidomethyl, Carbamyl, Carboxymethyl, Oxidation, Phospho, Glu->pyro-Glu	6.8	113.9	1	99.0 (M:99.0)	3.5	18301.29	1271
1272		true	tr|F1MG13|F1MG13_BOVIN	Uncharacterized protein (Fragment) OS=Bos taurus GN=MYO15A PE=4 SV=2	1	Carbamidomethyl, Carbamyl, Carboxymethyl, Oxidation, Phospho	9.3	389.8	1	98.9 (M:98.9)	0.5	26851.67	1272
1273		true	tr|E1BFW7|E1BFW7_BOVIN	Uncharacterized protein OS=Bos taurus GN=RFX7 PE=4 SV=2	3	Carbamidomethyl, Carbamyl, Carboxymethyl, Oxidation, Phospho	6.0	157.3	1	98.9 (M:98.9)	2.4	16055.47	1273
1274		true	tr|E1BLT5|E1BLT5_BOVIN	Uncharacterized protein OS=Bos taurus GN=ABCB4 PE=3 SV=2	4	Carbamyl, Oxidation, Phospho	8.7	140.3	1	98.7 (M:98.7)	2.7	653.35	1274
1275		true	sp|Q32LB9|NOA1_BOVIN	Nitric oxide-associated protein 1 OS=Bos taurus GN=NOA1 PE=2 SV=1	4	Gln->pyro-Glu, Carbamyl, Phospho	9.0	77.2	2	98.7 (M:98.7)	4.6	838.57	1275
1276		true	tr|G5E533|G5E533_BOVIN	Uncharacterized protein OS=Bos taurus GN=PPFIA4 PE=4 SV=1	4	Carbamidomethyl, Carbamyl, Phospho	5.8	134.7	1	98.7 (M:98.7)	4.4	750.72	1276
1277		true	tr|G3N0M6|G3N0M6_BOVIN	Uncharacterized protein OS=Bos taurus PE=4 SV=1	2	Carbamidomethyl, Oxidation, Phospho	5.9	12.3	2	98.7 (M:98.7)	11.8	10.45	1277
1278		true	tr|E1BDQ4|E1BDQ4_BOVIN	Uncharacterized protein OS=Bos taurus GN=RYR1 PE=4 SV=2	1	Carbamidomethyl, Carbamyl, Phospho	5.2	565.7	1	98.6 (M:98.6)	0.3	587.51	1278
1279		true	tr|F1MMT4|F1MMT4_BOVIN	Uncharacterized protein OS=Bos taurus GN=CEP112 PE=4 SV=2	2	Carbamyl, Oxidation, Glu->pyro-Glu	6.5	85.0	1	98.6 (M:98.6)	1.8	1060.20	1279
1280		true	tr|U5Y250|U5Y250_BOVIN	Vaccination-induced cytokine-like protein OS=Bos taurus GN=XLOC_032517 PE=2 SV=1	1	Carbamidomethyl, Carbamyl, Carboxymethyl, Oxidation, Phospho, Glu->pyro-Glu	8.6	18.5	1	98.6 (M:98.6)	6.1	891.36	1280
1281		true	tr|E1BDY7|E1BDY7_BOVIN	Uncharacterized protein OS=Bos taurus GN=PLXNC1 PE=4 SV=2	3	Carbamidomethyl, Carbamyl, Phospho, Glu->pyro-Glu	7.8	177.0	1	98.5 (M:98.5)	2.3	672.69	1281
1282		true	tr|E1BKG4|E1BKG4_BOVIN	Uncharacterized protein (Fragment) OS=Bos taurus GN=PDS5A PE=4 SV=2	3	Carbamyl, Oxidation, Phospho	8.5	146.5	1	98.5 (M:98.5)	2.5	891.15	1282
1283		true	tr|E1BAT5|E1BAT5_BOVIN	Uncharacterized protein OS=Bos taurus GN=ANKRD11 PE=4 SV=2	3	Gln->pyro-Glu, Carbamyl, Phospho, Glu->pyro-Glu	6.7	290.3	1	98.4 (M:98.4)	1.5	574.38	1283
1284		true	tr|A6QQN2|A6QQN2_BOVIN	Tyrosine-protein phosphatase non-receptor type OS=Bos taurus GN=PTPN1 PE=2 SV=1	2	Carbamidomethyl, Carbamyl, Carboxymethyl, Oxidation, Phospho, Glu->pyro-Glu	5.8	49.0	1	98.3 (M:98.3)	8.2	12433.46	1284
1285		true	tr|E1BEP4|E1BEP4_BOVIN	Uncharacterized protein OS=Bos taurus GN=ASH2L PE=4 SV=1	5	Carbamyl, Phospho	5.5	68.7	1	98.3 (M:98.3)	1.9	521.05	1285
1286		true	tr|G3MXB9|G3MXB9_BOVIN	Uncharacterized protein (Fragment) OS=Bos taurus GN=C10orf71 PE=4 SV=1	2	Carbamyl, Phospho	5.9	155.6	1	98.3 (M:98.3)	1.2	82.92	1286
1287		true	tr|E1BC33|E1BC33_BOVIN	Uncharacterized protein OS=Bos taurus GN=SRCAP PE=4 SV=2	3	Carbamidomethyl, Carbamyl, Oxidation, Phospho	5.6	344.5	2	98.3 (M:98.3)	0.8	662.62	1287
1288		true	tr|F1MD32|F1MD32_BOVIN	CREB binding protein OS=Bos taurus GN=CREBBP PE=4 SV=2	4	Carbamyl, Oxidation, Phospho	8.8	263.8	1	98.2 (M:98.2)	1.7	542.91	1288
1289		true	tr|F1MGW8|F1MGW8_BOVIN	Uncharacterized protein (Fragment) OS=Bos taurus GN=EXPH5 PE=4 SV=2	5	Carbamyl, Oxidation, Phospho	6.1	215.2	1	98.2 (M:98.2)	2.1	949.72	1289
1290		true	tr|F1MFT4|F1MFT4_BOVIN	Uncharacterized protein (Fragment) OS=Bos taurus GN=HNRNPU PE=4 SV=2	4	Carbamidomethyl, Gln->pyro-Glu, Carbamyl, Carboxymethyl, Oxidation, Phospho	8.7	77.5	3	98.1 (M:98.1)	7.0	20370.70	1290
1291		true	tr|A4IFE5|A4IFE5_BOVIN	LRRC8D protein OS=Bos taurus GN=LRRC8D PE=2 SV=1	5	Carbamidomethyl, Carbamyl, Carboxymethyl, Oxidation, Phospho, Glu->pyro-Glu	7.3	98.0	1	98.0 (M:98.0)	6.2	20458.92	1291
1292		true	tr|G3N0H4|G3N0H4_BOVIN	Uncharacterized protein (Fragment) OS=Bos taurus GN=SMARCC1 PE=4 SV=1	2	Carbamyl	5.3	104.7	2	98.0 (M:98.0)	2.9	760.42	1292
1293		true	tr|E1BBQ0|E1BBQ0_BOVIN	Uncharacterized protein OS=Bos taurus GN=KNTC1 PE=4 SV=2	3	Carbamidomethyl, Carbamyl, Phospho, Glu->pyro-Glu	5.7	254.7	1	98.0 (M:98.0)	1.4	743.37	1293
1294		true	tr|Q0VC60|Q0VC60_BOVIN	Dihydrouridine synthase 2-like, SMM1 homolog (S. cerevisiae) OS=Bos taurus GN=DUS2L PE=2 SV=1	1	Carbamidomethyl, Carbamyl, Oxidation, Phospho, Glu->pyro-Glu	6.7	55.2	1	97.8 (M:97.8)	2.4	836.52	1294
1295		true	tr|E1B9N6|E1B9N6_BOVIN	Uncharacterized protein OS=Bos taurus GN=EVPL PE=4 SV=1	1	Carbamyl, Phospho, Glu->pyro-Glu	6.5	231.4	1	97.7 (M:97.7)	0.4	26.83	1295
1296		true	tr|E1BBX9|E1BBX9_BOVIN	Uncharacterized protein OS=Bos taurus GN=UNC13C PE=4 SV=2	3	Carbamidomethyl, Carbamyl, Phospho	5.7	250.5	1	97.7 (M:97.7)	0.9	443.91	1296
1297		true	tr|Q1JPD9|Q1JPD9_BOVIN	G protein-coupled receptor, family C, group 5, member B OS=Bos taurus GN=GPRC5B PE=2 SV=1	1		7.6	43.0	1	97.6 (M:97.6)	3.1	10.40	1297
1298		true	tr|E1BMG7|E1BMG7_BOVIN	Uncharacterized protein (Fragment) OS=Bos taurus GN=TENM3 PE=4 SV=2	1	Carbamidomethyl, Carbamyl, Oxidation, Phospho	6.0	283.6	1	97.5 (M:97.5)	0.6	18.93	1298
1299		true	tr|F1MUC1|F1MUC1_BOVIN	Uncharacterized protein (Fragment) OS=Bos taurus GN=ABCC4 PE=3 SV=2	3	Carbamyl, Phospho	8.0	146.9	1	97.5 (M:97.5)	2.4	371.22	1299
1300		true	sp|Q2TBU9|RUVB2_BOVIN	RuvB-like 2 OS=Bos taurus GN=RUVBL2 PE=2 SV=3	2	Carbamyl, Oxidation, Phospho	5.6	51.1	2	97.4 (M:97.4)	3.5	526.57	1300
1301		true	tr|F1MGX4|F1MGX4_BOVIN	Uncharacterized protein OS=Bos taurus GN=FMNL1 PE=4 SV=2	1	Carbamidomethyl, Carbamyl, Oxidation, Phospho	5.7	123.1	1	97.4 (M:97.4)	0.0	705.84	1301
1302		true	tr|E1BM03|E1BM03_BOVIN	Uncharacterized protein OS=Bos taurus GN=WDR3 PE=4 SV=2	4	Gln->pyro-Glu, Carbamyl, Oxidation, Phospho	6.2	106.3	1	97.4 (M:97.4)	4.2	338.22	1302
1303		true	tr|A7MBA2|A7MBA2_BOVIN	PSMD1 protein OS=Bos taurus GN=PSMD1 PE=2 SV=1	3	Carbamyl, Phospho	5.2	105.8	1	97.3 (M:97.3)	2.9	41.90	1303
1304		true	sp|Q08E02|NR1D1_BOVIN	Nuclear receptor subfamily 1 group D member 1 OS=Bos taurus GN=NR1D1 PE=1 SV=1	4	Carbamidomethyl, Carbamyl, Carboxymethyl, Oxidation, Phospho	8.7	66.7	1	97.1 (M:97.1)	7.8	18271.40	1304
1305		true	tr|F1N440|F1N440_BOVIN	Uncharacterized protein OS=Bos taurus GN=ZNF652 PE=4 SV=2	3	Carbamidomethyl, Carbamyl, Carboxymethyl, Phospho	8.9	69.6	1	97.1 (M:97.1)	4.6	27993.84	1305
1306		true	tr|G3MXR8|G3MXR8_BOVIN	Uncharacterized protein OS=Bos taurus GN=ADGB PE=4 SV=1	3	Carbamyl, Oxidation, Phospho	8.6	190.0	2	97.1 (M:97.1)	1.4	730.35	1306
1307		true	tr|E1BNH9|E1BNH9_BOVIN	Uncharacterized protein OS=Bos taurus GN=OBSL1 PE=4 SV=2	2	Carbamyl, Phospho	5.4	207.6	3	97.1 (M:97.1)	1.1	30.26	1307
1308		true	tr|E1BDG8|E1BDG8_BOVIN	Uncharacterized protein (Fragment) OS=Bos taurus GN=KBTBD3 PE=4 SV=2	4	Carbamyl, Oxidation, Phospho	5.2	69.1	2	97.0 (M:97.0)	8.4	277.88	1308
1309		true	tr|A7YWF1|A7YWF1_BOVIN	ACSS2 protein OS=Bos taurus GN=ACSS2 PE=2 SV=1	4	Carbamyl, Phospho, Glu->pyro-Glu	6.1	78.7	1	97.0 (M:97.0)	5.1	323.58	1309
1310		true	tr|E1BGC1|E1BGC1_BOVIN	Uncharacterized protein OS=Bos taurus GN=MCCC1 PE=4 SV=1	3	Gln->pyro-Glu, Carbamyl, Oxidation, Phospho	8.4	80.4	1	97.0 (M:97.0)	4.1	670.30	1310
1311		true	tr|F1MNY2|F1MNY2_BOVIN	Uncharacterized protein OS=Bos taurus GN=TMEM2 PE=4 SV=2	4	Carbamidomethyl, Carbamyl, Carboxymethyl, Oxidation, Phospho	8.5	154.5	1	97.0 (M:97.0)	3.0	294.01	1311
1312		true	tr|F1N7S8|F1N7S8_BOVIN	Uncharacterized protein OS=Bos taurus GN=LOC783604 PE=4 SV=2	2	Carbamidomethyl, Carbamyl, Oxidation, Phospho	5.5	72.4	2	96.8 (M:96.8)	3.6	432.93	1312
1313		true	tr|F1MB21|F1MB21_BOVIN	Uncharacterized protein (Fragment) OS=Bos taurus GN=ARHGEF40 PE=4 SV=2	1	Carbamidomethyl, Carbamyl, Phospho	5.8	164.8	1	96.8 (M:96.8)	0.7	687.47	1313
1314		true	tr|G8GWQ5|G8GWQ5_BOVIN	Oral-facial-digital syndrome 1 Y-linked isoform 1 OS=Bos taurus GN=OFD1Y PE=2 SV=1	4	Carbamidomethyl, Carbamyl, Carboxymethyl, Phospho	6.3	100.9	3	96.8 (M:96.8)	3.0	40831.72	1314
1315		true	tr|F1N1Q7|F1N1Q7_BOVIN	Uncharacterized protein (Fragment) OS=Bos taurus GN=PREX1 PE=4 SV=2	3	Carbamidomethyl, Carbamyl, Carboxymethyl, Phospho	6.1	177.4	1	96.6 (M:96.6)	2.2	365.66	1315
1316		true	tr|F1N628|F1N628_BOVIN	Uncharacterized protein (Fragment) OS=Bos taurus GN=ZSCAN20 PE=4 SV=1	2	Carbamidomethyl, Gln->pyro-Glu, Carbamyl, Carboxymethyl, Phospho	5.9	117.6	1	96.6 (M:96.6)	1.7	25410.11	1316
1317		true	tr|F1N192|F1N192_BOVIN	Uncharacterized protein OS=Bos taurus GN=CSPP1 PE=4 SV=2	2	Carbamyl, Oxidation, Phospho	6.1	143.6	2	96.6 (M:96.6)	2.1	478.46	1317
1318		true	sp|P11023|RAB3A_BOVIN	Ras-related protein Rab-3A OS=Bos taurus GN=RAB3A PE=1 SV=3	2	Carbamyl, Oxidation, Phospho	4.9	24.9	1	96.5 (M:96.5)	12.3	373.62	1318
1319		true	tr|A8E641|A8E641_BOVIN	DPYSL5 protein OS=Bos taurus GN=DPYSL5 PE=2 SV=1	4	Carbamyl, Oxidation, Phospho, Glu->pyro-Glu	6.7	61.5	1	96.5 (M:96.5)	4.6	429.22	1319
1320		true	sp|Q3MHJ7|EEPD1_BOVIN	Endonuclease/exonuclease/phosphatase family domain-containing protein 1 OS=Bos taurus GN=EEPD1 PE=2 SV=1	3	Carbamidomethyl, Carbamyl, Carboxymethyl, Oxidation, Phospho	8.7	62.7	1	96.5 (M:96.5)	8.2	25606.19	1320
1321		true	tr|F1MXG8|F1MXG8_BOVIN	Non-specific protein-tyrosine kinase (Fragment) OS=Bos taurus GN=ABL1 PE=4 SV=2	2	Carbamyl, Oxidation, Phospho	8.9	122.8	1	96.4 (M:96.4)	1.6	943.77	1321
1322		true	tr|F1N3L7|F1N3L7_BOVIN	Uncharacterized protein (Fragment) OS=Bos taurus GN=DOCK7 PE=4 SV=2	3	Carbamidomethyl, Carbamyl, Carboxymethyl, Oxidation, Phospho	6.3	238.0	1	96.4 (M:96.4)	2.2	11591.12	1322
1323		true	sp|G3N131|H11_BOVIN	Histone H1.1 OS=Bos taurus GN=HIST1H1A PE=1 SV=1	4	Carbamyl, Phospho	10.9	22.1	1	96.3 (M:96.3)	15.6	460.98	1323
1324		true	tr|F1MUK0|F1MUK0_BOVIN	Uncharacterized protein OS=Bos taurus GN=FER1L5 PE=4 SV=2	5	Carbamidomethyl, Carbamyl, Oxidation, Phospho	8.8	241.3	1	96.3 (M:96.3)	2.2	547.29	1324
1325		true	sp|Q2HJ46|RNF8_BOVIN	E3 ubiquitin-protein ligase RNF8 OS=Bos taurus GN=RNF8 PE=2 SV=1	3	Carbamidomethyl, Carbamyl, Phospho	8.4	55.7	1	96.3 (M:96.3)	7.6	360.08	1325
1326		true	tr|E1BCU2|E1BCU2_BOVIN	Uncharacterized protein OS=Bos taurus GN=MYOM3 PE=4 SV=2	2	Carbamyl, Phospho	5.7	162.7	1	96.3 (M:96.3)	1.4	4.50	1326
1327		true	sp|Q2KIL1|CA141_BOVIN	Uncharacterized protein C1orf141 homolog OS=Bos taurus PE=2 SV=1	3	Carbamyl, Phospho	9.7	49.7	2	96.3 (M:96.3)	6.0	1202.08	1327
1328		true	tr|G3MZ05|G3MZ05_BOVIN	Uncharacterized protein OS=Bos taurus GN=HAVCR1 PE=4 SV=1	3	Gln->pyro-Glu, Carbamyl	9.5	38.9	1	96.3 (M:96.3)	5.1	742.59	1328
1329		true	sp|Q2T9X8|SPICE_BOVIN	Spindle and centriole-associated protein 1 OS=Bos taurus GN=SPICE1 PE=2 SV=1	4	Gln->pyro-Glu, Carbamyl, Oxidation, Phospho	6.2	95.7	2	96.2 (M:96.2)	3.3	583.83	1329
1330		true	tr|A5D9E8|A5D9E8_BOVIN	Mimecan OS=Bos taurus GN=OGN PE=2 SV=1	4	Carbamyl, Oxidation, Phospho, Glu->pyro-Glu	5.4	34.2	4	96.2 (M:96.2)	7.0	444.35	1330
1331		true	tr|F1N2U3|F1N2U3_BOVIN	Mitogen-activated protein kinase kinase kinase kinase OS=Bos taurus GN=MAP4K5 PE=3 SV=2	5	Carbamidomethyl, Carbamyl, Carboxymethyl, Phospho	8.1	95.1	1	96.1 (M:96.1)	2.8	36921.30	1331
1332		true	tr|E1BG09|E1BG09_BOVIN	Uncharacterized protein OS=Bos taurus GN=RTTN PE=4 SV=2	3	Carbamidomethyl, Carbamyl, Carboxymethyl, Oxidation, Phospho	6.5	247.6	1	96.1 (M:96.1)	1.7	294.05	1332
1333		true	tr|E1BLI8|E1BLI8_BOVIN	Uncharacterized protein OS=Bos taurus GN=SOGA1 PE=4 SV=1	2	Carbamidomethyl, Carbamyl, Oxidation, Phospho	6.1	159.1	1	96.0 (M:96.0)	1.6	611.46	1333
1334		true	tr|G3MZG3|G3MZG3_BOVIN	Uncharacterized protein OS=Bos taurus GN=RPRD2 PE=4 SV=1	4	Carbamidomethyl, Carbamyl, Oxidation, Phospho	6.0	100.1	3	96.0 (M:96.0)	5.1	723.89	1334
1335		true	tr|F1N4C5|F1N4C5_BOVIN	Uncharacterized protein (Fragment) OS=Bos taurus GN=PLXND1 PE=4 SV=2	3	Carbamidomethyl, Carbamyl, Phospho	6.9	215.7	1	95.9 (M:95.9)	1.3	800.62	1335
1336		true	tr|F1MYW1|F1MYW1_BOVIN	Uncharacterized protein (Fragment) OS=Bos taurus GN=STAB2 PE=4 SV=2	2	Carbamidomethyl, Carbamyl, Carboxymethyl, Oxidation, Phospho	6.1	277.9	1	95.9 (M:95.9)	1.1	16710.80	1336
1337		true	sp|P20072|ANXA7_BOVIN	Annexin A7 OS=Bos taurus GN=ANXA7 PE=1 SV=2	3	Carbamyl, Oxidation, Phospho	6.4	49.9	1	95.9 (M:95.9)	7.6	29.42	1337
1338		true	tr|G0XWI2|G0XWI2_COWPX	IMV heparin binding surface protein involved in IMV maturation OS=Cowpox virus GN=CPXV_GER2002_MKY_106 PE=4 SV=1	2	Gln->pyro-Glu, Carbamyl, Oxidation	5.8	37.4	15	95.8 (M:95.8)	8.6	403.60	1338
1339		true	tr|A6QQT0|A6QQT0_BOVIN	HMGXB4 protein OS=Bos taurus GN=HMGXB4 PE=2 SV=1	5	Carbamyl, Oxidation, Phospho	9.5	53.4	2	95.8 (M:95.8)	8.5	513.55	1339
1340		true	tr|A6QNM9|A6QNM9_BOVIN	SLC25A12 protein OS=Bos taurus GN=SLC25A12 PE=2 SV=1	1	Carbamidomethyl, Carbamyl, Carboxymethyl, Oxidation, Phospho	8.4	74.5	1	95.8 (M:95.8)	1.8	21.74	1340
1341		true	tr|F1N1A2|F1N1A2_BOVIN	Uncharacterized protein OS=Bos taurus GN=DHX57 PE=4 SV=1	1	Carbamidomethyl, Carbamyl, Carboxymethyl, Oxidation, Phospho, Glu->pyro-Glu	7.7	155.6	1	95.8 (M:95.8)	0.4	1370.10	1341
1342		true	tr|E1BPU0|E1BPU0_BOVIN	Uncharacterized protein OS=Bos taurus GN=LRRK2 PE=4 SV=2	4	Carbamidomethyl, Carbamyl, Oxidation, Phospho	6.2	286.0	1	95.8 (M:95.8)	1.5	876.63	1342
1343		true	sp|Q58DU7|SH3L1_BOVIN	SH3 domain-binding glutamic acid-rich-like protein OS=Bos taurus GN=SH3BGRL PE=3 SV=1	4	Carbamyl, Phospho	5.2	12.8	1	95.7 (M:95.7)	20.2	512.62	1343
1344		true	tr|A0A0B7G4D8|A0A0B7G4D8_THACB	Magnesium transporter NIPA2 OS=Bos taurus GN=NIPA2 PE=2 SV=1 OS=Thanatephorus cucumeris (strain AG1-IB / isolate 7/3/14) GN=RSOLAG1IB_05413 PE=4 SV=1	3	Carbamyl, Oxidation, Phospho	9.4	79.4	1	95.6 (M:95.6)	4.4	741.39	1344
1345		true	tr|A0JND6|A0JND6_BOVIN	Terpene cyclase/mutase family member OS=Bos taurus GN=LSS PE=2 SV=1	4	Carbamidomethyl, Carbamyl, Oxidation, Phospho	6.5	77.7	3	95.6 (M:95.6)	5.0	517.96	1345
1346		true	tr|E1BK89|E1BK89_BOVIN	Uncharacterized protein OS=Bos taurus GN=LCT PE=3 SV=2	4	Carbamyl, Phospho, Glu->pyro-Glu	5.9	219.0	1	95.4 (M:95.4)	1.8	59.03	1346
1347		true	tr|E1BLN1|E1BLN1_BOVIN	Uncharacterized protein OS=Bos taurus GN=SYCP1 PE=4 SV=1	3	Carbamyl, Phospho, Glu->pyro-Glu	7.0	116.8	1	95.4 (M:95.4)	3.4	670.55	1347
1348		true	tr|G5E580|G5E580_BOVIN	Uncharacterized protein OS=Bos taurus GN=DOCK11 PE=4 SV=1	4	Carbamyl, Phospho	7.8	237.8	1	95.3 (M:95.3)	1.7	588.13	1348
1349		true	tr|F1MGH3|F1MGH3_BOVIN	Uncharacterized protein (Fragment) OS=Bos taurus GN=AKR1E2 PE=4 SV=1	2	Carbamidomethyl, Carbamyl, Carboxymethyl, Oxidation, Phospho	8.2	35.8	1	95.3 (M:95.3)	7.3	697.71	1349
1350		true	tr|F1MJI8|F1MJI8_BOVIN	Uncharacterized protein OS=Bos taurus GN=PHKA2 PE=4 SV=2	3	Carbamidomethyl, Carbamyl, Carboxymethyl, Oxidation, Phospho	5.8	138.4	1	95.1 (M:95.1)	2.2	519.24	1350
1351		true	tr|E1B949|E1B949_BOVIN	Uncharacterized protein OS=Bos taurus GN=FAT4 PE=4 SV=2	4	Carbamyl, Phospho	4.8	541.9	1	95.1 (M:95.1)	0.7	348.74	1351
1352		true	tr|Q08DX1|Q08DX1_BOVIN	SH3-domain GRB2-like 2 OS=Bos taurus GN=SH3GL2 PE=2 SV=1	4	Gln->pyro-Glu, Carbamyl, Oxidation, Phospho	5.3	39.9	1	95.0 (M:95.0)	8.2	696.37	1352
1353		true	tr|G3X6J9|G3X6J9_BOVIN	Uncharacterized protein (Fragment) OS=Bos taurus PE=4 SV=1	3	Carbamyl, Oxidation, Phospho	8.8	157.2	1	95.0 (M:95.0)	2.3	300.47	1353
1354		true	tr|E1BKZ0|E1BKZ0_BOVIN	Uncharacterized protein OS=Bos taurus GN=PCNT PE=4 SV=2	2	Carbamyl, Phospho	5.5	327.0	1	95.0 (M:95.0)	0.7	657.27	1354
1355		true	tr|E1BKI9|E1BKI9_BOVIN	Uncharacterized protein OS=Bos taurus GN=ARFGEF2 PE=4 SV=2	3	Carbamidomethyl, Carbamyl, Oxidation, Phospho	6.0	202.4	1	94.9 (M:94.9)	1.4	766.59	1355
1356		true	tr|G3MYM2|G3MYM2_BOVIN	Uncharacterized protein OS=Bos taurus GN=TBC1D4 PE=4 SV=1	2	Carbamidomethyl, Carboxymethyl, Phospho	6.6	103.9	3	94.9 (M:94.9)	0.0	22.21	1356
1357		true	tr|F1MZ75|F1MZ75_BOVIN	Uncharacterized protein (Fragment) OS=Bos taurus GN=FAM65C PE=4 SV=2	4	Carbamidomethyl, Carbamyl, Carboxymethyl, Phospho	8.5	106.0	1	94.8 (M:94.8)	3.6	16695.72	1357
1358		true	tr|F6Q3P6|F6Q3P6_BOVIN	Uncharacterized protein OS=Bos taurus GN=MINK1 PE=4 SV=1	3	Carbamyl	7.2	147.3	2	94.8 (M:94.8)	2.1	785.31	1358
1359		true	tr|F1MSL9|F1MSL9_BOVIN	Uncharacterized protein (Fragment) OS=Bos taurus GN=UGGT2 PE=4 SV=1	3	Carbamyl, Oxidation, Phospho	7.5	174.7	1	94.8 (M:94.8)	2.1	595.10	1359
1360		true	tr|E1BEZ4|E1BEZ4_BOVIN	Uncharacterized protein OS=Bos taurus GN=TRIM29 PE=4 SV=2	3	Carbamyl, Phospho	6.9	65.0	2	94.8 (M:94.8)	7.1	168.67	1360
1361		true	tr|G3N022|G3N022_BOVIN	Uncharacterized protein OS=Bos taurus GN=SPEG PE=4 SV=1	5	Carbamidomethyl, Carbamyl, Oxidation, Phospho	8.9	354.8	2	94.8 (M:94.8)	1.5	490.65	1361
1362		true	tr|G3MX97|G3MX97_BOVIN	Uncharacterized protein (Fragment) OS=Bos taurus GN=LOC101905441 PE=4 SV=1	4	Carbamyl, Phospho	7.4	83.7	1	94.7 (M:94.7)	5.7	25.75	1362
1363		true	sp|Q5E9J8|RIC8A_BOVIN	Synembryn-A OS=Bos taurus GN=RIC8A PE=2 SV=1	3	Carbamyl, Oxidation, Phospho	5.5	59.5	1	94.7 (M:94.7)	3.0	548.56	1363
1364		true	tr|E1BGS2|E1BGS2_BOVIN	Uncharacterized protein OS=Bos taurus GN=ACAD10 PE=3 SV=1	2	Carbamyl, Oxidation, Phospho	8.0	117.6	1	94.7 (M:94.7)	1.7	68.14	1364
1365		true	sp|P32596|VGLN_BEFVB	Non-structural glycoprotein GNS OS=Bovine ephemeral fever virus (strain BB7721) GN=GNS PE=3 SV=1	3	Carbamyl, Phospho	7.8	68.8	1	94.7 (M:94.7)	4.3	547.39	1365
1366		true	sp|P08487|PLCG1_BOVIN	1-phosphatidylinositol 4,5-bisphosphate phosphodiesterase gamma-1 OS=Bos taurus GN=PLCG1 PE=1 SV=1	2	Carbamyl, Phospho	5.7	148.2	2	94.7 (M:94.7)	2.0	733.83	1366
1367		true	tr|E1BMG8|E1BMG8_BOVIN	Uncharacterized protein OS=Bos taurus GN=DOCK4 PE=4 SV=2	2	Carbamyl, Oxidation, Phospho	7.7	225.4	1	94.6 (M:94.6)	1.1	643.29	1367
1368		true	tr|A0JNH2|A0JNH2_BOVIN	Catenin (Cadherin-associated protein), alpha 3 OS=Bos taurus GN=CTNNA3 PE=2 SV=1	3	Carbamyl, Oxidation, Phospho	6.2	74.9	2	94.5 (M:94.5)	5.1	461.92	1368
1369		true	tr|F1MW44|F1MW44_BOVIN	Coagulation factor XIII A chain OS=Bos taurus GN=F13A1 PE=4 SV=1	3	Carbamyl, Oxidation, Phospho	5.8	82.6	1	94.5 (M:94.5)	4.6	564.80	1369
1370		true	tr|G3X6I2|G3X6I2_BOVIN	Uncharacterized protein (Fragment) OS=Bos taurus GN=NXF2 PE=4 SV=1	3	Carbamidomethyl, Carbamyl, Carboxymethyl, Oxidation, Phospho, Glu->pyro-Glu	8.4	69.5	1	94.5 (M:94.5)	9.1	39361.09	1370
1371		true	tr|A6H798|A6H798_BOVIN	LOC616153 protein OS=Bos taurus GN=LOC616153 PE=2 SV=1	3	Carbamyl, Phospho	9.6	63.9	1	94.4 (M:94.4)	5.0	701.09	1371
1372		true	tr|E1BNN6|E1BNN6_BOVIN	Uncharacterized protein OS=Bos taurus GN=NLRP1 PE=4 SV=1	2	Carbamidomethyl, Gln->pyro-Glu, Carbamyl, Carboxymethyl, Oxidation, Phospho	6.0	165.4	1	94.4 (M:94.4)	1.2	53.35	1372
1373		true	tr|F1MKI2|F1MKI2_BOVIN	Uncharacterized protein (Fragment) OS=Bos taurus GN=RAB12 PE=3 SV=2	2	Oxidation	5.6	19.5	2	94.4 (M:94.4)	6.5	10.69	1373
1374		true	tr|E1BN64|E1BN64_BOVIN	Uncharacterized protein OS=Bos taurus GN=PDE3B PE=4 SV=2	3	Carbamidomethyl, Carbamyl, Phospho	5.5	124.8	1	94.4 (M:94.4)	2.1	526.84	1374
1375		true	sp|A6H7C2|PEX3_BOVIN	Peroxisomal biogenesis factor 3 OS=Bos taurus GN=PEX3 PE=2 SV=1	3	Carbamidomethyl, Carbamyl, Carboxymethyl, Oxidation, Phospho	7.6	42.1	2	94.3 (M:94.3)	6.7	17857.42	1375
1376		true	sp|A6QLT4|MTM1_BOVIN	Myotubularin OS=Bos taurus GN=MTM1 PE=2 SV=2	1	Carbamyl, Oxidation, Phospho	8.8	70.0	1	94.3 (M:94.3)	1.0	67.96	1376
1377		true	tr|M5BLC6|M5BLC6_THACB	ADP-ribosylation factor-like protein 5A OS=Thanatephorus cucumeris (strain AG1-IB / isolate 7/3/14) GN=Arl5a PE=3 SV=1	2	Carbamidomethyl, Carbamyl, Carboxymethyl, Oxidation, Phospho	5.7	20.5	1	94.3 (M:94.3)	9.3	903.06	1377
1378		true	tr|F1MQG4|F1MQG4_BOVIN	Uncharacterized protein OS=Bos taurus GN=ZDBF2 PE=4 SV=2	1	Carbamidomethyl, Carbamyl, Carboxymethyl, Oxidation, Phospho	5.0	252.1	1	94.3 (M:94.3)	0.4	79.09	1378
1379		true	sp|A7MB35|ODPA_BOVIN	Pyruvate dehydrogenase E1 component subunit alpha, somatic form, mitochondrial OS=Bos taurus GN=PDHA1 PE=2 SV=1	2	Carbamidomethyl, Carbamyl, Phospho	8.3	43.4	1	94.2 (M:94.2)	4.9	582.35	1379
1380		true	tr|E1BJV0|E1BJV0_BOVIN	Uncharacterized protein OS=Bos taurus GN=EHD4 PE=4 SV=1	2	Carbamyl, Oxidation, Phospho	7.1	61.0	1	94.2 (M:94.2)	3.7	78.14	1380
1381		true	sp|Q58DW6|RAB25_BOVIN	Ras-related protein Rab-25 OS=Bos taurus GN=RAB25 PE=2 SV=1	3	Carbamyl	6.0	23.5	1	94.1 (M:94.1)	14.1	506.10	1381
1382		true	tr|F1ME58|F1ME58_BOVIN	Uncharacterized protein OS=Bos taurus GN=CYP4A11 PE=3 SV=1	3	Carbamyl, Oxidation, Phospho	9.1	58.7	7	94.1 (M:94.1)	4.5	632.45	1382
1383		true	tr|E1B9S7|E1B9S7_BOVIN	Uncharacterized protein OS=Bos taurus GN=OTUD7B PE=4 SV=1	5	Carbamidomethyl, Carbamyl, Oxidation, Phospho	6.4	91.9	1	94.0 (M:94.0)	5.6	733.47	1383
1384		true	tr|F1MP22|F1MP22_BOVIN	Uncharacterized protein OS=Bos taurus GN=CACNA1E PE=3 SV=2	3	Carbamyl, Phospho	8.6	256.2	1	93.9 (M:93.9)	1.2	1032.38	1384
1385		true	tr|F1MI56|F1MI56_BOVIN	Uncharacterized protein OS=Bos taurus GN=ANKRD17 PE=4 SV=2	1	Carbamidomethyl, Gln->pyro-Glu, Carbamyl, Carboxymethyl, Phospho	6.1	274.8	1	93.9 (M:93.9)	0.0	9306.80	1385
1386		true	tr|A6QQE0|A6QQE0_BOVIN	OBSCN protein (Fragment) OS=Bos taurus GN=OBSCN PE=2 SV=1	2	Carbamyl, Phospho	6.3	162.2	1	93.9 (M:93.9)	1.0	473.86	1386
1387		true	tr|F1MND3|F1MND3_BOVIN	Uncharacterized protein OS=Bos taurus GN=TEX10 PE=4 SV=2	4	Carbamyl, Phospho	9.4	105.7	2	93.8 (M:93.8)	3.8	673.94	1387
1388		true	sp|Q2TBH9|COG8_BOVIN	Conserved oligomeric Golgi complex subunit 8 OS=Bos taurus GN=COG8 PE=2 SV=1	2	Carbamyl, Phospho, Glu->pyro-Glu	5.0	69.7	2	93.7 (M:93.7)	3.0	31.92	1388
1389		true	tr|E1BNK1|E1BNK1_BOVIN	Uncharacterized protein OS=Bos taurus GN=CCDC73 PE=4 SV=2	2	Gln->pyro-Glu, Carbamyl, Oxidation, Phospho	5.2	122.5	1	93.7 (M:93.7)	1.5	683.46	1389
1390		true	tr|F1MZU0|F1MZU0_BOVIN	Uncharacterized protein OS=Bos taurus GN=DYNC2H1 PE=4 SV=2	5	Carbamyl, Oxidation, Phospho	7.0	207.4	1	93.7 (M:93.7)	2.3	531.00	1390
1391		true	tr|E1BDL7|E1BDL7_BOVIN	Uncharacterized protein OS=Bos taurus GN=PREX2 PE=4 SV=2	1	Carbamyl, Oxidation, Phospho	7.5	182.6	1	93.6 (M:93.6)	0.6	769.34	1391
1392		true	tr|F1MG30|F1MG30_BOVIN	Uncharacterized protein OS=Bos taurus GN=PLA2G4D PE=4 SV=2	1	Carbamyl, Phospho	5.6	91.4	1	93.6 (M:93.6)	1.3	27.14	1392
1393		true	sp|E1B9W9|UBP42_BOVIN	Ubiquitin carboxyl-terminal hydrolase 42 OS=Bos taurus GN=USP42 PE=3 SV=1	2	Carbamidomethyl, Carbamyl, Phospho	8.8	146.7	1	93.5 (M:93.5)	1.9	41.76	1393
1394		true	tr|Q1ECS9|Q1ECS9_BOVIN	Prolactin-related protein 11 OS=Bos taurus PE=2 SV=1	2	Carbamyl, Phospho	7.0	27.6	8	93.5 (M:93.5)	8.0	901.84	1394
1395		true	tr|G5E6N8|G5E6N8_BOVIN	Uncharacterized protein OS=Bos taurus GN=SYT2 PE=4 SV=1	2	Carbamidomethyl, Carbamyl, Carboxymethyl, Oxidation, Phospho	8.2	46.6	1	93.5 (M:93.5)	4.6	24.19	1395
1396		true	tr|E1B8K2|E1B8K2_BOVIN	Uncharacterized protein OS=Bos taurus GN=CELF6 PE=4 SV=1	2	Carbamidomethyl, Carbamyl, Carboxymethyl, Oxidation, Phospho	8.7	50.5	2	93.4 (M:93.4)	2.9	51540.19	1396
1397		true	sp|O02659|MBL2_BOVIN	Mannose-binding protein C OS=Bos taurus GN=MBL PE=2 SV=1	2		5.1	26.5	1	93.4 (M:93.4)	8.8	12.54	1397
1398		true	tr|F1MXC4|F1MXC4_BOVIN	Uncharacterized protein OS=Bos taurus GN=PCNX PE=4 SV=2	3	Carbamyl, Oxidation, Phospho	6.7	258.1	1	93.3 (M:93.3)	1.5	490.18	1398
1399		true	tr|E1BJZ4|E1BJZ4_BOVIN	Uncharacterized protein OS=Bos taurus GN=GCC1 PE=4 SV=1	1	Carbamyl, Phospho, Glu->pyro-Glu	5.7	87.5	1	93.2 (M:93.2)	1.3	856.91	1399
1400		true	tr|F2FB42|F2FB42_BOVIN	Mucin-5B OS=Bos taurus GN=MUC5B PE=4 SV=1	4	Carbamidomethyl, Carbamyl, Oxidation, Phospho	5.7	689.4	2	93.1 (M:93.1)	0.9	621.83	1400
1401		true	tr|F1MTC3|F1MTC3_BOVIN	Uncharacterized protein OS=Bos taurus GN=ZHX2 PE=4 SV=2	2	Carbamyl, Oxidation	6.4	92.1	1	93.1 (M:93.1)	3.1	355.91	1401
1402		true	tr|F1MFY5|F1MFY5_BOVIN	Uncharacterized protein OS=Bos taurus GN=C2CD3 PE=4 SV=2	2	Carbamyl, Phospho	6.7	259.3	3	93.1 (M:93.1)	0.5	1333.09	1402
1403		true	tr|F1N0Y9|F1N0Y9_BOVIN	Uncharacterized protein (Fragment) OS=Bos taurus GN=ZFR PE=4 SV=1	1	Carbamyl, Phospho	9.2	112.4	1	93.0 (M:93.0)	1.2	763.60	1403
1404		true	tr|Q8QMV5|Q8QMV5_COWPX	CPXV122 protein OS=Cowpox virus GN=CPXV122 CDS PE=4 SV=1	4	Carbamidomethyl, Carbamyl, Carboxymethyl, Oxidation, Phospho	6.5	90.3	20	92.9 (M:92.9)	5.7	24446.08	1404
1405		true	tr|B8Q795|B8Q795_BOVIN	NUCB2 (Fragment) OS=Bos taurus PE=4 SV=1	2		4.4	3.6	1	92.9 (M:92.9)	53.3	12.21	1405
1406		true	tr|F1MSR8|F1MSR8_BOVIN	Collagen alpha-1(II) chain OS=Bos taurus GN=COL2A1 PE=4 SV=2	4	Carbamyl, Oxidation, Phospho	8.7	134.3	2	92.9 (M:92.9)	2.9	970.98	1406
1407		true	tr|F1MYB8|F1MYB8_BOVIN	von Willebrand factor A domain-containing protein 7 OS=Bos taurus GN=VWA7 PE=4 SV=2	3	Carbamyl, Phospho, Glu->pyro-Glu	6.0	90.2	2	92.8 (M:92.8)	4.0	683.72	1407
1408		true	tr|E1B8C5|E1B8C5_BOVIN	Uncharacterized protein OS=Bos taurus GN=PDK1 PE=4 SV=1	3	Carbamidomethyl, Carbamyl, Carboxymethyl, Oxidation, Phospho, Glu->pyro-Glu	8.6	49.4	1	92.8 (M:92.8)	5.7	439.35	1408
1409		true	tr|E1B7Q3|E1B7Q3_BOVIN	Uncharacterized protein OS=Bos taurus GN=LAMC2 PE=4 SV=2	3	Carbamidomethyl, Carbamyl, Carboxymethyl, Phospho	6.0	131.4	1	92.8 (M:92.8)	2.5	23055.66	1409
1410		true	tr|F1MPW1|F1MPW1_BOVIN	Uncharacterized protein OS=Bos taurus GN=DIP2A PE=4 SV=2	3	Carbamyl, Oxidation, Phospho	8.2	169.6	1	92.7 (M:92.7)	1.7	991.97	1410
1411		true	sp|Q32KY1|DRC1_BOVIN	Dynein regulatory complex protein 1 OS=Bos taurus GN=DRC1 PE=2 SV=1	3	Gln->pyro-Glu, Carbamyl	5.7	84.0	2	92.7 (M:92.7)	3.1	811.90	1411
1412		true	tr|A5D7A2|A5D7A2_BOVIN	GARS protein OS=Bos taurus GN=GARS PE=2 SV=1	2	Carbamyl, Oxidation, Phospho	6.9	83.1	2	92.7 (M:92.7)	1.4	46.21	1412
1413		true	tr|F1MF37|F1MF37_BOVIN	Ubiquitin carboxyl-terminal hydrolase (Fragment) OS=Bos taurus GN=USP31 PE=3 SV=2	1	Carbamyl, Phospho	9.1	138.5	1	92.7 (M:92.7)	0.5	62.21	1413
1414		true	tr|F1MPF0|F1MPF0_BOVIN	Uncharacterized protein (Fragment) OS=Bos taurus GN=TRPM7 PE=4 SV=2	2	Carbamyl, Oxidation, Phospho, Glu->pyro-Glu	7.9	213.3	1	92.7 (M:92.7)	1.1	716.50	1414
1415		true	tr|Q863H7|Q863H7_BOVIN	Cytochrome P450 1A1 (Fragment) OS=Bos taurus PE=2 SV=1	4	Carbamyl, Phospho	6.3	34.9	3	92.6 (M:92.6)	7.0	44.19	1415
1416		true	tr|Q3ZCI4|Q3ZCI4_BOVIN	PGD protein OS=Bos taurus GN=PGD PE=2 SV=2	2	Carbamidomethyl, Phospho	6.6	53.0	2	92.6 (M:92.6)	4.6	9.63	1416
1417		true	tr|E1BFC2|E1BFC2_BOVIN	Uncharacterized protein OS=Bos taurus GN=KDM3A PE=4 SV=1	2	Carbamyl, Oxidation, Phospho, Glu->pyro-Glu	8.2	147.6	1	92.6 (M:92.6)	2.6	725.45	1417
1418		true	tr|G3MWK5|G3MWK5_BOVIN	Uncharacterized protein OS=Bos taurus GN=CCDC15 PE=4 SV=1	1	Carbamyl, Phospho	6.6	91.1	1	92.5 (M:92.5)	1.3	59.05	1418
1419		true	tr|E1BMQ1|E1BMQ1_BOVIN	Uncharacterized protein OS=Bos taurus GN=OTOF PE=4 SV=1	2	Carbamidomethyl, Carbamyl, Carboxymethyl, Phospho	5.5	226.8	1	92.5 (M:92.5)	1.4	764.28	1419
1420		true	tr|G3X6V5|G3X6V5_BOVIN	Uncharacterized protein (Fragment) OS=Bos taurus PE=4 SV=1	3	Carbamidomethyl, Carbamyl, Carboxymethyl	9.4	135.3	1	92.5 (M:92.5)	0.6	31136.78	1420
1421		true	tr|E1B754|E1B754_BOVIN	Uncharacterized protein OS=Bos taurus GN=MAST2 PE=4 SV=2	4	Carbamyl, Phospho	7.2	186.6	1	92.5 (M:92.5)	2.2	489.63	1421
1422		true	tr|E1BDQ2|E1BDQ2_BOVIN	Uncharacterized protein OS=Bos taurus GN=BRD8 PE=4 SV=2	3	Carbamidomethyl, Carbamyl, Oxidation, Phospho	4.5	127.8	1	92.5 (M:92.5)	1.8	977.35	1422
1423		true	tr|F1MI41|F1MI41_BOVIN	Uncharacterized protein OS=Bos taurus GN=SYNRG PE=4 SV=1	4	Carbamyl, Oxidation, Phospho	5.0	147.3	2	92.5 (M:92.5)	3.1	683.39	1423
1424		true	tr|E1BKJ6|E1BKJ6_BOVIN	Uncharacterized protein OS=Bos taurus GN=NYAP1 PE=4 SV=2	2	Carbamidomethyl, Carbamyl, Carboxymethyl, Oxidation, Phospho	9.6	88.0	1	92.4 (M:92.4)	3.3	613.62	1424
1425		true	tr|G3MZG0|G3MZG0_BOVIN	Uncharacterized protein (Fragment) OS=Bos taurus GN=LOC100847355 PE=4 SV=1	2	Carbamidomethyl, Carbamyl, Oxidation, Phospho	5.7	390.9	2	92.4 (M:92.4)	0.8	448.52	1425
1426		true	tr|F1N2G0|F1N2G0_BOVIN	Myosin-7 OS=Bos taurus GN=MYH7 PE=4 SV=2	3	Carbamidomethyl, Carbamyl, Carboxymethyl, Oxidation, Phospho, Glu->pyro-Glu	5.5	223.8	1	92.4 (M:92.4)	1.4	494.51	1426
1427		true	sp|Q08DQ2|GFPT2_BOVIN	Glutamine--fructose-6-phosphate aminotransferase [isomerizing] 2 OS=Bos taurus GN=GFPT2 PE=1 SV=1	2	Gln->pyro-Glu, Carbamyl, Oxidation, Phospho	7.6	77.0	1	92.4 (M:92.4)	2.6	571.38	1427
1428		true	tr|F1N3I3|F1N3I3_BOVIN	Uncharacterized protein OS=Bos taurus GN=UBE2O PE=4 SV=2	2	Carbamidomethyl, Carbamyl, Carboxymethyl, Phospho	5.0	140.3	2	92.4 (M:92.4)	0.7	793.71	1428
1429		true	tr|G5E5V6|G5E5V6_BOVIN	Uncharacterized protein OS=Bos taurus GN=CGNL1 PE=4 SV=1	3	Carbamyl, Oxidation, Phospho, Glu->pyro-Glu	5.5	147.8	1	92.4 (M:92.4)	1.9	537.47	1429
1430		true	tr|F1MLX7|F1MLX7_BOVIN	Uncharacterized protein OS=Bos taurus GN=KBTBD12 PE=4 SV=2	2	Carbamidomethyl, Carbamyl, Carboxymethyl, Oxidation, Phospho	6.0	70.5	1	92.3 (M:92.3)	2.1	688.54	1430
1431		true	sp|Q3SYS9|KBP_BOVIN	KIF1-binding protein OS=Bos taurus GN=KBP PE=2 SV=1	3	Carbamyl, Oxidation, Phospho	5.4	72.0	1	92.2 (M:92.2)	5.0	619.35	1431
1432		true	tr|F1MMP2|F1MMP2_BOVIN	Uncharacterized protein OS=Bos taurus GN=CFAP57 PE=4 SV=2	1	Carbamyl, Phospho, Glu->pyro-Glu	5.6	143.4	1	92.2 (M:92.2)	1.5	21.90	1432
1433		true	tr|E1BA11|E1BA11_BOVIN	Uncharacterized protein (Fragment) OS=Bos taurus GN=FAM184A PE=4 SV=2	2	Carbamyl, Glu->pyro-Glu	5.6	129.5	2	92.2 (M:92.2)	1.7	507.22	1433
1434		true	sp|Q3SZU5|SPCS3_BOVIN	Signal peptidase complex subunit 3 OS=Bos taurus GN=SPCS3 PE=2 SV=1	2	Oxidation, Phospho	8.7	20.3	2	92.2 (M:92.2)	11.7	11.19	1434
1435		true	tr|A5D987|A5D987_BOVIN	Ubiquitin-conjugating enzyme E2N-like OS=Bos taurus GN=UBE2N PE=2 SV=1	2	Carbamidomethyl, Carbamyl	5.7	17.1	2	92.1 (M:92.1)	12.5	11.14	1435
1436		true	sp|Q07537|GALT1_BOVIN	Polypeptide N-acetylgalactosaminyltransferase 1 OS=Bos taurus GN=GALNT1 PE=1 SV=1	2		7.8	64.2	1	92.1 (M:92.1)	3.8	13.36	1436
1437		true	sp|Q2HJ57|COTL1_BOVIN	Coactosin-like protein OS=Bos taurus GN=COTL1 PE=2 SV=3	2		5.1	16.0	1	92.0 (M:92.0)	12.0	14.40	1437
1438		true	tr|E1BEB8|E1BEB8_BOVIN	Uncharacterized protein OS=Bos taurus GN=SUPT6H PE=4 SV=2	4	Carbamyl, Oxidation, Phospho, Glu->pyro-Glu	4.8	199.1	1	91.9 (M:91.9)	1.6	676.70	1438
1439		true	tr|F1MVP3|F1MVP3_BOVIN	Protein Jade-1 OS=Bos taurus GN=JADE1 PE=4 SV=2	4	Carbamidomethyl, Carbamyl, Oxidation, Phospho	7.7	95.2	2	91.9 (M:91.9)	5.6	591.32	1439
1440		true	tr|E1BP84|E1BP84_BOVIN	Uncharacterized protein (Fragment) OS=Bos taurus GN=ZNF512B PE=4 SV=2	3	Carbamyl, Phospho	9.8	97.2	2	91.8 (M:91.8)	2.3	794.65	1440
1441		true	tr|E1BC98|E1BC98_BOVIN	Transcription elongation factor SPT5 OS=Bos taurus GN=SUPT5H PE=3 SV=2	2	Carbamyl, Oxidation, Phospho	5.1	120.1	2	91.8 (M:91.8)	1.9	811.43	1441
1442		true	tr|F1MTR1|F1MTR1_BOVIN	Uncharacterized protein OS=Bos taurus GN=IQGAP2 PE=4 SV=2	4	Gln->pyro-Glu, Carbamyl, Oxidation, Phospho	5.7	178.4	1	91.7 (M:91.7)	2.6	583.12	1442
1443		true	tr|F1MGM4|F1MGM4_BOVIN	Uncharacterized protein OS=Bos taurus GN=NCOR1 PE=4 SV=2	1	Carbamyl, Oxidation, Phospho, Glu->pyro-Glu	6.7	267.0	1	91.7 (M:91.7)	0.3	101.58	1443
1444		true	tr|G3N2G3|G3N2G3_BOVIN	Uncharacterized protein OS=Bos taurus GN=GPRIN3 PE=4 SV=1	1	Carbamyl, Phospho	6.5	82.1	1	91.6 (M:91.6)	0.0	22.53	1444
1445		true	tr|F1MKS1|F1MKS1_BOVIN	Uncharacterized protein OS=Bos taurus GN=PWWP2A PE=4 SV=2	3	Carbamyl	9.1	81.6	1	91.6 (M:91.6)	2.5	781.85	1445
1446		true	tr|A7MB88|A7MB88_BOVIN	TMEM63A protein OS=Bos taurus GN=TMEM63A PE=2 SV=1	2	Carbamidomethyl, Carbamyl, Oxidation	7.7	91.7	1	91.6 (M:91.6)	2.0	1051.91	1446
1447		true	tr|F1N388|F1N388_BOVIN	Uncharacterized protein (Fragment) OS=Bos taurus GN=AKAP11 PE=4 SV=1	1	Carbamyl, Oxidation, Phospho, Glu->pyro-Glu	5.1	209.1	1	91.5 (M:91.5)	0.9	2.74	1447
1448		true	tr|F1MPD4|F1MPD4_BOVIN	Uncharacterized protein (Fragment) OS=Bos taurus GN=EFR3B PE=4 SV=2	1	Carbamyl, Oxidation, Phospho	6.3	92.9	1	91.5 (M:91.5)	1.9	553.07	1448
1449		true	sp|Q9TTK6-2|AOC3_BOVIN	Isoform 2 of Membrane primary amine oxidase OS=Bos taurus GN=AOC3	4	Carbamyl, Phospho	6.6	86.9	1	91.5 (M:91.5)	7.0	554.36	1449
1450		true	tr|F1MS50|F1MS50_BOVIN	General transcription factor II-I repeat domain-containing protein 2 OS=Bos taurus GN=GTF2IRD2 PE=4 SV=1	5	Carbamidomethyl, Carbamyl, Oxidation, Phospho	5.5	106.9	2	91.4 (M:91.4)	5.5	859.01	1450
1451		true	tr|F1N052|F1N052_BOVIN	Uncharacterized protein OS=Bos taurus GN=SMARCA5 PE=4 SV=2	2	Carbamyl, Phospho	8.4	121.9	2	91.4 (M:91.4)	1.9	680.88	1451
1452		true	tr|E1B7G5|E1B7G5_BOVIN	Uncharacterized protein OS=Bos taurus GN=RBM12B PE=4 SV=2	2	Carbamyl, Phospho	6.6	115.8	1	91.3 (M:91.3)	3.5	548.08	1452
1453		true	tr|Q1JPH2|Q1JPH2_BOVIN	Ras related v-ral simian leukemia viral oncogene homolog A (Fragment) OS=Bos taurus GN=RALA PE=2 SV=1	2	Gln->pyro-Glu, Carbamyl, Phospho	4.8	20.8	2	91.2 (M:91.2)	12.0	36.94	1453
1454		true	tr|F1N3H2|F1N3H2_BOVIN	Uncharacterized protein (Fragment) OS=Bos taurus GN=LINGO3 PE=4 SV=2	3	Carbamidomethyl, Carbamyl, Carboxymethyl, Phospho	9.5	67.4	1	91.2 (M:91.2)	8.2	21573.41	1454
1455		true	tr|E1BI51|E1BI51_BOVIN	Uncharacterized protein (Fragment) OS=Bos taurus GN=FNDC1 PE=4 SV=2	3	Carbamyl, Oxidation, Phospho	9.6	206.5	1	91.2 (M:91.2)	1.5	685.46	1455
1456		true	tr|Q0VCZ5|Q0VCZ5_BOVIN	Protein phosphatase 1, regulatory (Inhibitor) subunit 13 like OS=Bos taurus GN=PPP1R13L PE=2 SV=1	3	Carbamyl, Phospho	6.4	89.3	1	91.2 (M:91.2)	3.5	10.02	1456
1457		true	tr|F1MDL3|F1MDL3_BOVIN	Uncharacterized protein (Fragment) OS=Bos taurus GN=STX3 PE=3 SV=2	4	Carbamyl	5.2	32.0	2	91.2 (M:91.2)	15.4	606.96	1457
1458		true	tr|A7E3A5|A7E3A5_BOVIN	LOC616485 protein (Fragment) OS=Bos taurus GN=LOC616485 PE=2 SV=1	4	Gln->pyro-Glu, Carbamyl, Phospho	9.4	18.3	2	91.1 (M:91.1)	10.6	604.77	1458
1459		true	tr|F1MTC2|F1MTC2_BOVIN	Glutamine--tRNA ligase OS=Bos taurus GN=QARS PE=3 SV=2	4	Carbamyl, Phospho	7.4	87.4	2	91.1 (M:91.1)	6.1	651.21	1459
1460		true	sp|Q2KIW9|KCY_BOVIN	UMP-CMP kinase OS=Bos taurus GN=CMPK1 PE=2 SV=2	4	Oxidation, Glu->pyro-Glu	5.7	22.3	1	91.0 (M:91.0)	16.8	380.04	1460
1461		true	tr|F1MZW8|F1MZW8_BOVIN	Ribosomal protein S6 kinase OS=Bos taurus GN=RPS6KA3 PE=3 SV=1	2	Carbamyl, Oxidation, Phospho	6.3	83.6	2	91.0 (M:91.0)	1.1	936.57	1461
1462		true	tr|Q1LZF6|Q1LZF6_BOVIN	Acyl-CoA synthetase long-chain family member 5 OS=Bos taurus GN=ACSL5 PE=2 SV=1	2	Carbamidomethyl, Carbamyl, Phospho	8.0	76.0	1	91.0 (M:91.0)	4.1	15.06	1462
1463		true	tr|L7YC03|L7YC03_SBV	M polyprotein OS=Schmallenberg virus PE=4 SV=1	3	Carbamidomethyl, Carbamyl, Carboxymethyl, Phospho	8.4	158.6	4	91.0 (M:91.0)	3.7	38437.34	1463
1464		true	tr|F1N1H5|F1N1H5_BOVIN	Uncharacterized protein (Fragment) OS=Bos taurus GN=MCM10 PE=4 SV=2	1	Gln->pyro-Glu, Carbamyl, Oxidation, Phospho	8.8	96.3	1	90.9 (M:90.9)	1.0	8.89	1464
1465		true	tr|F1MP58|F1MP58_BOVIN	Uncharacterized protein (Fragment) OS=Bos taurus GN=FHAD1 PE=4 SV=2	2	Carbamyl, Phospho	6.6	162.5	1	90.9 (M:90.9)	1.6	736.13	1465
1466		true	tr|O71101|O71101_ADEB3	Hexon protein OS=Bovine adenovirus B serotype 3 PE=2 SV=1	3	Carbamyl, Phospho	6.1	101.9	25	90.8 (M:90.8)	2.7	698.71	1466
1467		true	sp|P54149|MSRA_BOVIN	Mitochondrial peptide methionine sulfoxide reductase OS=Bos taurus GN=MSRA PE=1 SV=2	2	Carbamyl, Oxidation, Phospho	7.1	25.8	1	90.8 (M:90.8)	7.7	509.86	1467
1468		true	tr|G3X823|G3X823_BOVIN	Uncharacterized protein OS=Bos taurus GN=TRIM26 PE=4 SV=1	4	Carbamidomethyl, Carbamyl, Carboxymethyl, Oxidation	5.0	62.5	1	90.8 (M:90.8)	3.8	35815.49	1468
1469		true	tr|A8E645|A8E645_BOVIN	GFPT1 protein OS=Bos taurus GN=GFPT1 PE=2 SV=1	4	Carbamyl, Oxidation	6.4	76.7	2	90.8 (M:90.8)	6.2	591.46	1469
1470		true	tr|G3MXN3|G3MXN3_BOVIN	Uncharacterized protein OS=Bos taurus GN=SGSM2 PE=4 SV=1	2	Carbamyl, Oxidation, Phospho	6.0	122.4	1	90.7 (M:90.7)	2.6	253.70	1470
1471		true	tr|E1BLQ9|E1BLQ9_BOVIN	Uncharacterized protein OS=Bos taurus GN=LPIN3 PE=4 SV=2	1	Carbamyl, Phospho	5.7	93.1	1	90.7 (M:90.7)	0.8	1021.55	1471
1472		true	tr|Q17QR9|Q17QR9_BOVIN	Sparc/osteonectin, cwcv and kazal-like domains proteoglycan (Testican) 1 OS=Bos taurus GN=SPOCK1 PE=2 SV=1	4	Carbamidomethyl, Carbamyl, Carboxymethyl, Phospho	5.3	49.4	2	90.6 (M:90.6)	7.9	13526.50	1472
1473		true	tr|E1BNP8|E1BNP8_BOVIN	Uncharacterized protein OS=Bos taurus GN=SUPT16H PE=4 SV=2	3	Carbamyl, Oxidation, Phospho	5.5	119.9	1	90.5 (M:90.5)	3.0	840.66	1473
1474		true	tr|Q6R010|Q6R010_COWPX	B7.5R OS=Cowpox virus PE=4 SV=1	4	Carbamyl, Oxidation, Phospho	6.8	214.4	4	90.5 (M:90.5)	2.4	780.34	1474
1475		true	sp|P03523|L_VSIVA	RNA-directed RNA polymerase L OS=Vesicular stomatitis Indiana virus (strain San Juan) GN=L PE=1 SV=2	1	Carbamidomethyl, Carbamyl, Oxidation, Phospho	8.6	240.7	1	90.5 (M:90.5)	0.0	19.99	1475
1476		true	sp|P13840|RDRP_BTV10	RNA-directed RNA polymerase OS=Bluetongue virus 10 (isolate USA) GN=S1 PE=3 SV=1	3	Carbamyl, Oxidation, Phospho	8.9	149.5	3	90.5 (M:90.5)	2.0	694.75	1476
1477		true	tr|G3X746|G3X746_BOVIN	Uncharacterized protein (Fragment) OS=Bos taurus GN=CABIN1 PE=4 SV=1	3	Gln->pyro-Glu, Carbamyl, Oxidation, Phospho	5.7	238.4	1	90.5 (M:90.5)	1.6	38.88	1477
1478		true	tr|G3N2U5|G3N2U5_BOVIN	Uncharacterized protein OS=Bos taurus GN=TTLL6 PE=4 SV=1	4	Carbamidomethyl, Carbamyl, Carboxymethyl, Phospho	9.0	97.4	2	90.3 (M:90.3)	4.7	17827.10	1478
1479		true	sp|A7MBJ2|SENP7_BOVIN	Sentrin-specific protease 7 OS=Bos taurus GN=SENP7 PE=2 SV=1	4	Carbamyl, Phospho	5.8	118.8	1	90.3 (M:90.3)	2.0	354.51	1479
1480		true	sp|P08166|KAD2_BOVIN	Adenylate kinase 2, mitochondrial OS=Bos taurus GN=AK2 PE=1 SV=2	3	Gln->pyro-Glu, Carbamyl, Oxidation, Phospho	8.3	26.5	2	90.3 (M:90.3)	9.5	50.65	1480
1481		true	tr|G3N2W3|G3N2W3_BOVIN	Uncharacterized protein OS=Bos taurus GN=LOC785872 PE=4 SV=1	3	Carbamyl, Oxidation, Phospho	9.0	39.5	6	90.2 (M:90.2)	4.7	546.86	1481
1482		true	tr|F1N544|F1N544_BOVIN	Uncharacterized protein (Fragment) OS=Bos taurus GN=CHD3 PE=4 SV=2	2	Carbamyl, Oxidation, Phospho	7.0	226.4	1	90.1 (M:90.1)	1.2	388.01	1482
1483		true	sp|Q3MHW6|MOT1_BOVIN	Monocarboxylate transporter 1 OS=Bos taurus GN=SLC16A1 PE=2 SV=2	2	Carbamyl	8.2	54.3	2	90.0 (M:90.0)	5.8	10.06	1483
1484		true	tr|E1BPV0|E1BPV0_BOVIN	Uncharacterized protein OS=Bos taurus GN=ARMC3 PE=4 SV=2	1	Carbamidomethyl, Carbamyl, Carboxymethyl, Phospho, Glu->pyro-Glu	6.0	96.3	1	89.9 (M:89.9)	1.9	41.89	1484
1485		true	tr|A4FV16|A4FV16_BOVIN	Pregnancy-associated glycoprotein 9 OS=Bos taurus GN=PAG9 PE=2 SV=1	2	Gln->pyro-Glu, Carbamyl, Phospho	9.5	42.8	9	89.9 (M:89.9)	5.5	32.69	1485
1486		true	tr|F1MRG6|F1MRG6_BOVIN	Uncharacterized protein OS=Bos taurus GN=LOC536097 PE=4 SV=2	3	Carbamidomethyl, Carbamyl, Phospho	8.1	42.6	5	89.8 (M:89.8)	8.9	494.36	1486
1487		true	tr|Q3ZC32|Q3ZC32_BOVIN	Optineurin OS=Bos taurus GN=OPTN PE=2 SV=1	5	Gln->pyro-Glu, Carbamyl, Oxidation, Phospho	5.2	65.2	1	89.8 (M:89.8)	8.6	594.01	1487
1488		true	tr|F1N3L1|F1N3L1_BOVIN	Protein phosphatase 1 regulatory subunit 12 OS=Bos taurus GN=PPP1R12A PE=4 SV=2	2	Phospho	5.3	79.3	3	89.8 (M:89.8)	4.4	475.79	1488
1489		true	tr|E1BCH9|E1BCH9_BOVIN	Uncharacterized protein OS=Bos taurus GN=VCPIP1 PE=4 SV=2	3	Carbamidomethyl, Carbamyl, Carboxymethyl, Oxidation, Phospho	6.7	134.5	1	89.8 (M:89.8)	4.7	15199.63	1489
1490		true	sp|Q0III9|ACTN3_BOVIN	Alpha-actinin-3 OS=Bos taurus GN=ACTN3 PE=2 SV=1	4	Carbamidomethyl, Carbamyl, Oxidation, Phospho	5.3	103.1	2	89.8 (M:89.8)	3.3	446.59	1490
1491		true	sp|A7YWC4|ATAD3_BOVIN	ATPase family AAA domain-containing protein 3 OS=Bos taurus GN=ATAD3 PE=2 SV=1	1	Phospho	9.3	66.1	1	89.8 (M:89.8)	1.7	3.48	1491
1492		true	tr|E1BN32|E1BN32_BOVIN	Uncharacterized protein OS=Bos taurus GN=RP1L1 PE=4 SV=2	4	Carbamidomethyl, Carbamyl, Carboxymethyl, Oxidation, Phospho	5.6	196.1	2	89.7 (M:89.7)	3.5	11326.68	1492
1493		true	sp|E1BHJ4|CP26B_BOVIN	Cytochrome P450 26B1 OS=Bos taurus GN=CYP26B1 PE=3 SV=1	2	Carbamyl, Oxidation, Phospho, Glu->pyro-Glu	8.9	57.4	1	89.7 (M:89.7)	2.3	424.07	1493
1494		true	sp|Q3T0Z7|DHPR_BOVIN	Dihydropteridine reductase OS=Bos taurus GN=QDPR PE=2 SV=1	2	Carbamidomethyl, Carbamyl	6.9	25.5	1	89.7 (M:89.7)	12.8	471.35	1494
1495		true	sp|Q29RY4|RNZ1_BOVIN	Zinc phosphodiesterase ELAC protein 1 OS=Bos taurus GN=ELAC1 PE=2 SV=1	3	Carbamidomethyl, Carbamyl, Oxidation, Phospho	5.7	40.0	1	89.7 (M:89.7)	5.2	387.02	1495
1496		true	tr|A2VE51|A2VE51_BOVIN	BAG3 protein OS=Bos taurus GN=BAG3 PE=2 SV=1	2	Carbamyl, Oxidation, Phospho	6.3	62.0	2	89.7 (M:89.7)	3.4	910.43	1496
1497		true	tr|G3X690|G3X690_BOVIN	Kinesin-like protein OS=Bos taurus GN=KIF16B PE=3 SV=1	2	Carbamyl, Oxidation, Phospho	5.9	157.5	1	89.7 (M:89.7)	1.2	8.96	1497
1498		true	tr|A5D7A3|A5D7A3_BOVIN	MKLN1 protein OS=Bos taurus GN=MKLN1 PE=2 SV=1	4	Carbamidomethyl, Carbamyl, Carboxymethyl, Phospho	5.9	84.7	1	89.6 (M:89.6)	6.3	13317.09	1498
1499		true	tr|F1MHA1|F1MHA1_BOVIN	Uncharacterized protein (Fragment) OS=Bos taurus GN=KMT2A PE=4 SV=2	2	Carbamyl, Oxidation, Phospho	9.2	417.3	1	89.6 (M:89.6)	0.7	799.84	1499
1500		true	sp|P33475|VP5_BTV1S	Outer capsid protein VP5 OS=Bluetongue virus 1 (isolate South Africa) GN=S6 PE=3 SV=1	3	Carbamyl, Oxidation, Phospho	6.2	59.4	1	89.6 (M:89.6)	3.2	665.25	1500
1501		true	tr|E1B7E2|E1B7E2_BOVIN	Uncharacterized protein (Fragment) OS=Bos taurus GN=DOCK3 PE=4 SV=2	2	Carbamidomethyl, Carbamyl, Oxidation, Phospho	6.6	221.2	1	89.6 (M:89.6)	1.0	775.61	1501
1502		true	tr|F1MF30|F1MF30_BOVIN	Uncharacterized protein OS=Bos taurus GN=CHRNB3 PE=3 SV=2	5	Carbamyl, Oxidation, Phospho	8.8	53.6	1	89.6 (M:89.6)	7.1	15.52	1502
1503		true	tr|F1MDV8|F1MDV8_BOVIN	Septin-10 (Fragment) OS=Bos taurus GN=SEPT10 PE=3 SV=2	2	Carbamidomethyl, Carbamyl, Carboxymethyl, Oxidation, Phospho	6.6	52.7	2	89.6 (M:89.6)	5.3	34.82	1503
1504		true	tr|Q91T17|Q91T17_LSDV	MRNA capping enzyme OS=Lumpy skin disease virus PE=4 SV=1	3	Carbamyl, Oxidation, Phospho	9.2	88.4	2	89.5 (M:89.5)	4.4	52.18	1504
1505		true	tr|Q0VCY5|Q0VCY5_BOVIN	Family with sequence similarity 60, member A OS=Bos taurus GN=FAM60A PE=2 SV=1	4	Carbamidomethyl, Carbamyl, Carboxymethyl, Phospho	9.5	24.8	2	89.5 (M:89.5)	14.0	21283.95	1505
1506		true	tr|G5E6D7|G5E6D7_BOVIN	Uncharacterized protein (Fragment) OS=Bos taurus PE=4 SV=1	2	Carbamidomethyl, Carbamyl, Carboxymethyl, Oxidation, Phospho	9.4	60.5	5	89.5 (M:89.5)	4.0	714.00	1506
1507		true	tr|E1B8T3|E1B8T3_BOVIN	Uncharacterized protein OS=Bos taurus GN=TCF20 PE=4 SV=2	4	Carbamidomethyl, Gln->pyro-Glu, Carbamyl, Carboxymethyl, Oxidation, Phospho	9.1	211.9	1	89.5 (M:89.5)	2.4	15241.66	1507
1508		true	tr|F1MW01|F1MW01_BOVIN	Uncharacterized protein OS=Bos taurus GN=ESPL1 PE=4 SV=2	2	Carbamyl, Oxidation, Phospho	7.2	230.8	2	89.5 (M:89.5)	0.8	822.75	1508
1509		true	tr|Q08DN9|Q08DN9_BOVIN	Poly (ADP-ribose) polymerase family, member 9 OS=Bos taurus GN=PARP9 PE=2 SV=1	3	Carbamyl, Phospho	6.4	91.9	1	89.4 (M:89.4)	5.6	54.85	1509
1510		true	tr|F1MP08|F1MP08_BOVIN	Ubiquitin carboxyl-terminal hydrolase OS=Bos taurus GN=USP38 PE=3 SV=2	3	Carbamidomethyl, Carbamyl, Carboxymethyl, Phospho	5.7	115.9	2	89.3 (M:89.3)	2.2	16572.27	1510
1511		true	sp|Q08DP6|RHG10_BOVIN	Rho GTPase-activating protein 10 OS=Bos taurus GN=ARHGAP10 PE=2 SV=1	2	Carbamyl, Oxidation, Phospho	7.1	89.3	1	89.3 (M:89.3)	1.9	1103.06	1511
1512		true	tr|A5D7U5|A5D7U5_BOVIN	Beta-galactosidase OS=Bos taurus GN=GLB1 PE=2 SV=2	3	Carbamyl, Phospho	7.0	73.4	3	89.3 (M:89.3)	4.4	10.78	1512
1513		true	tr|F1ML31|F1ML31_BOVIN	Uncharacterized protein (Fragment) OS=Bos taurus GN=LRP4 PE=4 SV=2	2	Carbamidomethyl, Carbamyl, Carboxymethyl, Phospho	5.1	210.8	2	89.2 (M:89.2)	0.4	1260.07	1513
1514		true	sp|Q9WJC7|POLN_EEVVM	Non-structural polyprotein OS=Venezuelan equine encephalitis virus (strain Mena II) PE=2 SV=2	3	Carbamyl, Phospho	7.4	278.4	3	89.2 (M:89.2)	1.0	837.36	1514
1515		true	tr|E1BND2|E1BND2_BOVIN	Uncharacterized protein OS=Bos taurus GN=CEP104 PE=4 SV=1	3	Carbamidomethyl, Carbamyl	8.2	104.5	1	89.2 (M:89.2)	3.5	393.44	1515
1516		true	tr|F1N3G2|F1N3G2_BOVIN	Uncharacterized protein OS=Bos taurus GN=NOP2 PE=4 SV=1	3	Carbamyl, Phospho	9.0	89.8	2	89.2 (M:89.2)	4.5	363.20	1516
1517		true	sp|Q8B0H5|L_VSIVS	RNA-directed RNA polymerase L OS=Vesicular stomatitis Indiana virus (strain 85CLB South America) GN=L PE=3 SV=1	2	Gln->pyro-Glu, Carbamyl, Oxidation, Phospho	8.7	240.5	2	89.1 (M:89.1)	0.3	1283.52	1517
1518		true	tr|F1MCY7|F1MCY7_BOVIN	Uncharacterized protein OS=Bos taurus GN=ZCCHC11 PE=4 SV=2	1	Carbamyl, Phospho	8.4	187.9	1	89.1 (M:89.1)	0.7	1.47	1518
1519		true	sp|P12915|POLG_BOVEV	Genome polyprotein OS=Bovine enterovirus (strain VG-5-27) PE=1 SV=3	3	Carbamidomethyl, Carbamyl, Carboxymethyl, Oxidation, Phospho	6.1	242.3	1	89.1 (M:89.1)	1.9	9956.52	1519
1520		true	tr|F1MPR3|F1MPR3_BOVIN	Calcium-transporting ATPase OS=Bos taurus GN=ATP2A2 PE=3 SV=2	3	Carbamidomethyl, Carbamyl, Carboxymethyl, Phospho	5.2	111.9	4	89.1 (M:89.1)	2.5	829.68	1520
1521		true	sp|P40673|HMGB2_BOVIN	High mobility group protein B2 OS=Bos taurus GN=HMGB2 PE=1 SV=3	2	Carbamyl, Oxidation	7.6	24.0	2	89.1 (M:89.1)	9.6	740.63	1521
1522		true	tr|E1B838|E1B838_BOVIN	Piwi-like protein OS=Bos taurus GN=PIWIL3 PE=3 SV=2	2	Carbamyl, Oxidation, Phospho, Glu->pyro-Glu	9.5	101.0	1	89.0 (M:89.0)	2.5	437.68	1522
1523		true	tr|B9X245|B9X245_BOVIN	Factor VIII OS=Bos taurus GN=F8 PE=2 SV=1	2	Carbamidomethyl, Carbamyl, Carboxymethyl, Phospho	7.8	263.3	2	89.0 (M:89.0)	1.2	21392.18	1523
1524		true	tr|F1MD13|F1MD13_BOVIN	Uncharacterized protein OS=Bos taurus GN=TCAM1 PE=4 SV=2	3	Carbamidomethyl, Carbamyl, Carboxymethyl, Oxidation, Phospho	4.7	60.4	2	89.0 (M:89.0)	6.2	35397.51	1524
1525		true	sp|Q2YDK1|I20L2_BOVIN	Interferon-stimulated 20 kDa exonuclease-like 2 OS=Bos taurus GN=ISG20L2 PE=2 SV=1	4	Carbamyl, Phospho	9.9	38.6	1	89.0 (M:89.0)	11.5	585.45	1525
1526		true	tr|F1MCZ7|F1MCZ7_BOVIN	Uncharacterized protein OS=Bos taurus GN=UBTF PE=4 SV=2	3	Carbamyl, Oxidation, Phospho	5.7	88.6	1	88.9 (M:88.9)	3.6	492.64	1526
1527		true	tr|E1BBD0|E1BBD0_BOVIN	Uncharacterized protein OS=Bos taurus GN=C5H12orf66 PE=4 SV=1	5	Carbamyl, Oxidation, Phospho	9.0	50.3	1	88.9 (M:88.9)	11.5	753.27	1527
1528		true	tr|F1MRE3|F1MRE3_BOVIN	Uncharacterized protein OS=Bos taurus GN=PCNXL2 PE=4 SV=2	4	Carbamyl, Oxidation, Phospho	6.2	235.1	1	88.9 (M:88.9)	2.3	575.15	1528
1529		true	sp|Q148H7|K2C79_BOVIN	Keratin, type II cytoskeletal 79 OS=Bos taurus GN=KRT79 PE=2 SV=1	2	Carbamyl, Phospho	7.1	57.7	1	88.9 (M:88.9)	4.1	10.58	1529
1530		true	tr|F1N4B0|F1N4B0_BOVIN	Uncharacterized protein (Fragment) OS=Bos taurus GN=SASH1 PE=4 SV=1	2	Carbamyl, Oxidation, Phospho	7.6	122.3	1	88.7 (M:88.7)	1.7	543.81	1530
1531		true	tr|F1N4R6|F1N4R6_BOVIN	Uncharacterized protein OS=Bos taurus GN=MGAT4D PE=4 SV=2	4	Carbamyl, Oxidation, Phospho	9.0	43.3	2	88.6 (M:88.6)	7.3	227.00	1531
1532		true	tr|F1N026|F1N026_BOVIN	Integral membrane protein 2B OS=Bos taurus GN=ITM2B PE=4 SV=1	2	Carbamidomethyl, Oxidation, Phospho	5.1	30.4	2	88.6 (M:88.6)	7.1	11.07	1532
1533		true	sp|Q0P5F3|LIN7C_BOVIN	Protein lin-7 homolog C OS=Bos taurus GN=LIN7C PE=2 SV=1	3	Carbamidomethyl, Carbamyl, Phospho	8.5	21.8	3	88.6 (M:88.6)	16.2	20.11	1533
1534		true	tr|E1BKY0|E1BKY0_BOVIN	Uncharacterized protein OS=Bos taurus GN=ZNF197 PE=4 SV=1	1	Carbamidomethyl, Carbamyl, Carboxymethyl, Oxidation, Phospho, Glu->pyro-Glu	9.0	120.5	1	88.5 (M:88.5)	0.7	1193.40	1534
1535		true	tr|G3X684|G3X684_BOVIN	Uncharacterized protein OS=Bos taurus GN=TOPBP1 PE=4 SV=1	4	Carbamyl, Phospho	6.0	170.7	1	88.5 (M:88.5)	3.1	395.73	1535
1536		true	tr|G3MXY7|G3MXY7_BOVIN	Uncharacterized protein (Fragment) OS=Bos taurus GN=MTA1 PE=4 SV=1	3	Carbamyl, Oxidation, Phospho	9.4	80.3	4	88.5 (M:88.5)	3.9	646.43	1536
1537		true	tr|F1MXR8|F1MXR8_BOVIN	Uncharacterized protein OS=Bos taurus GN=ZC3H3 PE=4 SV=2	2	Carbamyl, Phospho	10.9	101.4	1	88.4 (M:88.4)	2.9	782.99	1537
1538		true	sp|P60661-2|MYL6_BOVIN	Isoform Smooth muscle of Myosin light polypeptide 6 OS=Bos taurus GN=MYL6	4	Carbamidomethyl	4.5	17.0	4	88.4 (M:88.4)	31.1	10.42	1538
1539		true	tr|Q2TBH2|Q2TBH2_BOVIN	Related RAS viral (R-ras) oncogene homolog OS=Bos taurus GN=RRAS PE=1 SV=1	2		6.4	23.6	2	88.4 (M:88.4)	12.8	8.57	1539
1540		true	tr|E1BPK3|E1BPK3_BOVIN	Uncharacterized protein OS=Bos taurus GN=ZNF800 PE=4 SV=2	1	Carbamyl, Phospho	9.7	64.2	1	88.4 (M:88.4)	0.0	616.44	1540
1541		true	tr|A0A088SGE5|A0A088SGE5_LSDV	Envelope protein (Fragment) OS=Lumpy skin disease virus GN=LSDV074 PE=4 SV=1	2	Carbamyl, Phospho	5.4	11.6	14	88.4 (M:88.4)	15.8	697.48	1541
1542		true	tr|F1MEU3|F1MEU3_BOVIN	Uncharacterized protein (Fragment) OS=Bos taurus GN=ATAD2B PE=3 SV=2	3	Carbamidomethyl, Carbamyl, Carboxymethyl, Oxidation, Phospho	7.3	143.1	2	88.4 (M:88.4)	2.7	45.53	1542
1543		true	tr|E1BE25|E1BE25_BOVIN	Uncharacterized protein OS=Bos taurus GN=FLNC PE=4 SV=1	2	Carbamyl, Phospho	5.7	290.6	1	88.4 (M:88.4)	1.1	426.42	1543
1544		true	tr|F1N737|F1N737_BOVIN	Uncharacterized protein OS=Bos taurus GN=ZBBX PE=4 SV=2	2	Carbamidomethyl, Carbamyl, Carboxymethyl, Phospho	5.5	96.5	2	88.4 (M:88.4)	2.6	31683.40	1544
1545		true	tr|Q91T24|Q91T24_LSDV	DNA-directed RNA polymerase subunit OS=Lumpy skin disease virus PE=4 SV=1	4	Carbamidomethyl, Carbamyl, Carboxymethyl, Oxidation, Phospho	8.7	139.3	2	88.3 (M:88.3)	3.2	23953.56	1545
1546		true	tr|F1MMZ0|F1MMZ0_BOVIN	Uncharacterized protein OS=Bos taurus GN=PPP1R16A PE=4 SV=1	2	Carbamyl, Phospho, Glu->pyro-Glu	5.5	56.7	2	88.3 (M:88.3)	2.3	777.24	1546
1547		true	tr|A7MB14|A7MB14_BOVIN	GIGYF2 protein OS=Bos taurus GN=GIGYF2 PE=2 SV=1	2	Carbamyl, Oxidation, Phospho	5.5	148.9	1	88.2 (M:88.2)	1.5	838.31	1547
1548		true	tr|E1BP87|E1BP87_BOVIN	Uncharacterized protein (Fragment) OS=Bos taurus GN=MYH4 PE=4 SV=2	1	Carbamidomethyl, Carbamyl, Carboxymethyl, Phospho, Glu->pyro-Glu	5.6	222.9	1	88.2 (M:88.2)	0.5	758.49	1548
1549		true	tr|B5T263|B5T263_BOBOX	Toll-like receptor OS=Bos indicus x Bos taurus GN=TLR2 PE=3 SV=1	2	Carbamyl	6.4	90.0	7	88.2 (M:88.2)	4.1	10.84	1549
1550		true	tr|F1MMN4|F1MMN4_BOVIN	Uncharacterized protein (Fragment) OS=Bos taurus GN=CCDC67 PE=4 SV=2	2	Carbamidomethyl, Gln->pyro-Glu, Carbamyl, Carboxymethyl, Oxidation, Phospho, Glu->pyro-Glu	6.2	71.2	2	88.2 (M:88.2)	3.8	535.71	1550
1551		true	tr|I1YZY5|I1YZY5_SBV	M polyprotein (Fragment) OS=Schmallenberg virus GN=M PE=4 SV=1	3	Carbamidomethyl, Carbamyl, Carboxymethyl, Phospho	8.2	74.6	1	88.1 (M:88.1)	8.2	17481.61	1551
1552		true	tr|F1MT04|F1MT04_BOVIN	Uncharacterized protein OS=Bos taurus PE=4 SV=2	3	Carbamidomethyl, Carbamyl, Carboxymethyl, Phospho	6.1	129.5	1	88.1 (M:88.1)	3.4	19855.30	1552
1553		true	tr|E1BMP1|E1BMP1_BOVIN	Uncharacterized protein OS=Bos taurus GN=SFMBT2 PE=4 SV=1	2	Gln->pyro-Glu, Oxidation, Phospho	6.1	106.3	1	88.1 (M:88.1)	2.0	18.43	1553
1554		true	tr|G3MYV5|G3MYV5_BOVIN	Uncharacterized protein OS=Bos taurus PE=4 SV=1	4	Carbamyl, Oxidation, Phospho	6.2	69.4	1	88.0 (M:88.0)	5.0	805.06	1554
1555		true	sp|P10522|MYP0_BOVIN	Myelin protein P0 OS=Bos taurus GN=MPZ PE=1 SV=2	3	Carbamyl, Oxidation, Phospho	9.5	27.4	1	88.0 (M:88.0)	3.2	1048.14	1555
1556		true	tr|E1BHZ4|E1BHZ4_BOVIN	Uncharacterized protein OS=Bos taurus GN=ZC3H4 PE=4 SV=1	2	Carbamyl, Phospho	5.8	139.7	1	88.0 (M:88.0)	2.1	825.72	1556
1557		true	tr|F1MZ23|F1MZ23_BOVIN	Uncharacterized protein (Fragment) OS=Bos taurus GN=PARD3 PE=4 SV=2	1	Carbamidomethyl, Gln->pyro-Glu, Carbamyl, Oxidation, Phospho	7.2	141.2	1	88.0 (M:88.0)	1.0	23.76	1557
1558		true	tr|F1MU28|F1MU28_BOVIN	Uncharacterized protein (Fragment) OS=Bos taurus GN=BANK1 PE=4 SV=2	3	Oxidation, Phospho	9.5	22.3	1	87.9 (M:87.9)	6.2	410.27	1558
1559		true	tr|E1BMZ9|E1BMZ9_BOVIN	Structural maintenance of chromosomes protein OS=Bos taurus GN=SMC4 PE=3 SV=2	3	Carbamyl, Phospho	6.6	147.2	2	87.9 (M:87.9)	1.9	904.53	1559
1560		true	sp|F1MF21|PARI_BOVIN	PCNA-interacting partner OS=Bos taurus GN=PARPBP PE=3 SV=2	5	Carbamyl, Oxidation, Phospho	8.5	65.4	1	87.9 (M:87.9)	7.2	257.49	1560
1561		true	tr|E1BPS4|E1BPS4_BOVIN	Uncharacterized protein (Fragment) OS=Bos taurus GN=KIAA1244 PE=4 SV=2	2	Carbamidomethyl, Carbamyl, Oxidation, Phospho	5.5	235.7	1	87.8 (M:87.8)	1.3	390.25	1561
1562		true	tr|F1MD78|F1MD78_BOVIN	Uncharacterized protein OS=Bos taurus GN=FNBP4 PE=4 SV=2	2	Carbamyl, Oxidation	4.7	110.9	1	87.8 (M:87.8)	2.4	729.90	1562
1563		true	sp|P11178|ODBA_BOVIN	2-oxoisovalerate dehydrogenase subunit alpha, mitochondrial OS=Bos taurus GN=BCKDHA PE=1 SV=1	3	Carbamidomethyl, Gln->pyro-Glu, Carbamyl, Carboxymethyl, Oxidation, Phospho	8.6	51.6	2	87.7 (M:87.7)	5.9	331.53	1563
1564		true	sp|Q0VC30|DPOG2_BOVIN	DNA polymerase subunit gamma-2, mitochondrial OS=Bos taurus GN=POLG2 PE=2 SV=1	2	Carbamidomethyl, Carbamyl, Oxidation, Phospho	8.6	54.6	1	87.7 (M:87.7)	5.6	25.51	1564
1565		true	sp|Q8HXK9|ASC_BOVIN	Apoptosis-associated speck-like protein containing a CARD OS=Bos taurus GN=PYCARD PE=2 SV=1	2	Carbamyl, Phospho	5.3	21.9	2	87.7 (M:87.7)	5.6	9.50	1565
1566		true	tr|E1BN61|E1BN61_BOVIN	Ribosomal protein S6 kinase OS=Bos taurus GN=RPS6KA5 PE=3 SV=2	3	Carbamidomethyl, Carbamyl, Oxidation, Phospho	7.1	88.6	1	87.6 (M:87.6)	3.9	718.14	1566
1567		true	sp|Q3MHM5|TBB4B_BOVIN	Tubulin beta-4B chain OS=Bos taurus GN=TUBB4B PE=2 SV=1	2	Carbamidomethyl, Carbamyl	4.8	49.8	4	87.6 (M:87.6)	6.5	10.24	1567
1568		true	tr|F1N5Y0|F1N5Y0_BOVIN	Uncharacterized protein OS=Bos taurus GN=SGOL2 PE=4 SV=2	4	Carbamidomethyl, Carbamyl, Carboxymethyl, Oxidation, Phospho	8.5	139.4	3	87.6 (M:87.6)	1.8	23285.02	1568
1569		true	tr|F1MC26|F1MC26_BOVIN	Uncharacterized protein (Fragment) OS=Bos taurus GN=TBC1D2B PE=4 SV=1	3	Carbamidomethyl, Carbamyl, Oxidation, Phospho	5.9	97.2	1	87.6 (M:87.6)	3.9	554.12	1569
1570		true	tr|E1BN52|E1BN52_BOVIN	Uncharacterized protein OS=Bos taurus GN=FREM1 PE=4 SV=2	3	Carbamidomethyl, Carbamyl, Carboxymethyl, Oxidation, Phospho	5.7	244.8	1	87.5 (M:87.5)	3.1	15800.29	1570
1571		true	tr|F1MWQ0|F1MWQ0_BOVIN	Complexin-3 OS=Bos taurus GN=CPLX3 PE=4 SV=1	2	Carbamyl, Oxidation, Phospho	4.8	17.6	2	87.4 (M:87.4)	8.9	618.54	1571
1572		true	tr|E1BD99|E1BD99_BOVIN	Uncharacterized protein OS=Bos taurus GN=TET2 PE=4 SV=2	2	Carbamidomethyl, Carbamyl, Phospho	8.2	219.3	1	87.3 (M:87.3)	0.8	1047.47	1572
1573		true	sp|Q29449|AT8A1_BOVIN	Probable phospholipid-transporting ATPase IA OS=Bos taurus GN=ATP8A1 PE=1 SV=2	1	Carbamidomethyl, Carbamyl, Carboxymethyl, Oxidation, Phospho	7.5	129.9	1	87.2 (M:87.2)	1.2	645.43	1573
1574		true	tr|A2VDK3|A2VDK3_BOVIN	Dishevelled associated activator of morphogenesis 1 OS=Bos taurus GN=DAAM1 PE=2 SV=1	3	Carbamyl, Oxidation, Phospho, Glu->pyro-Glu	6.8	122.2	1	87.1 (M:87.1)	2.9	573.41	1574
1575		true	tr|G0XX17|G0XX17_COWPX	Putative uncharacterized protein OS=Cowpox virus GN=CPXV_NOR1994_MAN_080 PE=4 SV=1	2	Carbamyl, Oxidation, Phospho	9.0	43.4	1	87.1 (M:87.1)	3.7	414.23	1575
1576		true	tr|H9KUU8|H9KUU8_BOVIN	Ethylmalonyl-CoA decarboxylase (Fragment) OS=Bos taurus GN=ECHDC1 PE=3 SV=1	3	Carbamidomethyl	7.8	33.5	2	87.1 (M:87.1)	10.5	9.34	1576
1577		true	tr|F1MNA5|F1MNA5_BOVIN	Histone deacetylase OS=Bos taurus GN=HDAC5 PE=3 SV=2	3	Carbamyl, Oxidation, Phospho	5.8	122.2	1	87.1 (M:87.1)	4.0	730.12	1577
1578		true	sp|P23728|FUS_BRSVR	Fusion glycoprotein F0 OS=Bovine respiratory syncytial virus (strain Rb94) GN=F PE=2 SV=1	4	Carbamidomethyl, Carbamyl, Carboxymethyl, Oxidation, Phospho	9.1	63.6	3	87.1 (M:87.1)	5.7	17361.21	1578
1579		true	tr|A5PK09|A5PK09_BOVIN	IFT80 protein OS=Bos taurus GN=IFT80 PE=2 SV=1	2	Carbamyl, Phospho	7.9	87.9	2	87.0 (M:87.0)	2.7	54.91	1579
1580		true	tr|E1BGS8|E1BGS8_BOVIN	Uncharacterized protein OS=Bos taurus GN=ATG16L1 PE=4 SV=2	2	Carbamidomethyl, Carbamyl, Oxidation, Phospho	6.0	70.0	1	87.0 (M:87.0)	2.9	688.27	1580
1581		true	tr|E1B7H2|E1B7H2_BOVIN	Uncharacterized protein OS=Bos taurus GN=COL7A1 PE=4 SV=2	5	Carbamyl, Phospho	6.2	293.3	1	87.0 (M:87.0)	1.6	649.17	1581
1582		true	tr|G3N0Q8|G3N0Q8_BOVIN	Uncharacterized protein OS=Bos taurus GN=AZU1 PE=3 SV=1	2	Carbamyl, Phospho	11.0	25.7	2	86.9 (M:86.9)	6.3	10.97	1582
1583		true	tr|Q77GD4|Q77GD4_LSDV	Putative myristylated IMV envelope protein OS=Lumpy skin disease virus GN=LW060 PE=4 SV=1	3	Carbamyl, Oxidation, Phospho	8.4	26.8	1	86.9 (M:86.9)	9.0	875.36	1583
1584		true	sp|E1BMP7|DNA2_BOVIN	DNA replication ATP-dependent helicase/nuclease DNA2 OS=Bos taurus GN=DNA2 PE=3 SV=3	2	Carbamyl, Oxidation, Phospho	7.1	120.4	2	86.9 (M:86.9)	0.8	918.17	1584
1585		true	tr|A8E646|A8E646_BOVIN	CARD11 protein OS=Bos taurus GN=CARD11 PE=2 SV=1	1	Phospho	6.0	132.5	1	86.9 (M:86.9)	0.7	1069.46	1585
1586		true	tr|E1BG38|E1BG38_BOVIN	Uncharacterized protein (Fragment) OS=Bos taurus GN=ARHGEF1 PE=4 SV=2	2	Carbamidomethyl, Carbamyl, Carboxymethyl, Phospho, Glu->pyro-Glu	5.6	105.9	1	86.8 (M:86.8)	3.3	15451.84	1586
1587		true	tr|E1BJ04|E1BJ04_BOVIN	Uncharacterized protein OS=Bos taurus GN=SPECC1L PE=4 SV=1	3	Carbamyl, Phospho	5.6	124.0	1	86.8 (M:86.8)	2.1	772.58	1587
1588		true	tr|F1MJH0|F1MJH0_BOVIN	Uncharacterized protein OS=Bos taurus GN=SPINK5 PE=4 SV=2	2	Carbamyl, Phospho, Glu->pyro-Glu	8.6	124.4	2	86.8 (M:86.8)	2.3	62.11	1588
1589		true	tr|F1MQA4|F1MQA4_BOVIN	Uncharacterized protein OS=Bos taurus GN=TBC1D30 PE=4 SV=2	2	Carbamyl, Oxidation, Phospho	8.6	100.0	1	86.8 (M:86.8)	1.6	379.81	1589
1590		true	tr|E1BJE0|E1BJE0_BOVIN	Phosphoinositide phospholipase C OS=Bos taurus GN=PLCD3 PE=4 SV=2	4	Carbamidomethyl, Carbamyl, Carboxymethyl, Oxidation, Phospho, Glu->pyro-Glu	8.0	92.1	1	86.8 (M:86.8)	6.9	13228.42	1590
1591		true	tr|F1MDA8|F1MDA8_BOVIN	Uncharacterized protein OS=Bos taurus GN=DCLK1 PE=4 SV=2	4	Gln->pyro-Glu, Carbamyl, Oxidation, Phospho	5.5	50.1	2	86.7 (M:86.7)	8.0	218.55	1591
1592		true	tr|F1MM55|F1MM55_BOVIN	Uncharacterized protein OS=Bos taurus GN=NUP133 PE=4 SV=1	2	Carbamyl, Phospho	5.1	129.0	2	86.7 (M:86.7)	0.8	41.46	1592
1593		true	tr|G5E648|G5E648_BOVIN	Uncharacterized protein OS=Bos taurus PE=4 SV=1	1	Carbamyl, Phospho, Glu->pyro-Glu	5.6	158.0	1	86.7 (M:86.7)	0.5	1025.12	1593
1594		true	tr|F1MTI4|F1MTI4_BOVIN	Uncharacterized protein OS=Bos taurus GN=ERC2 PE=4 SV=1	4	Carbamyl, Oxidation, Phospho, Glu->pyro-Glu	6.6	79.2	3	86.7 (M:86.7)	5.1	713.53	1594
1595		true	tr|E1BCS3|E1BCS3_BOVIN	Hexokinase OS=Bos taurus GN=HK3 PE=3 SV=1	4	Carbamyl, Phospho	5.2	99.6	3	86.7 (M:86.7)	4.7	59.61	1595
1596		true	tr|E1BN82|E1BN82_BOVIN	Mitogen-activated protein kinase 8 interacting protein 3 isoform 1 OS=Bos taurus GN=MAPK8IP3 PE=4 SV=2	2	Carbamyl, Oxidation, Phospho	5.3	145.9	2	86.7 (M:86.7)	2.3	630.32	1596
1597		true	tr|F6QMU7|F6QMU7_BOVIN	Histone deacetylase OS=Bos taurus GN=HDAC5 PE=3 SV=1	3	Carbamidomethyl, Carbamyl, Oxidation, Phospho	6.6	86.6	2	86.6 (M:86.6)	5.1	873.51	1597
1598		true	tr|E1BGB2|E1BGB2_BOVIN	Uncharacterized protein OS=Bos taurus GN=PRRC2B PE=4 SV=2	3	Carbamyl, Phospho	8.5	241.1	1	86.6 (M:86.6)	1.3	687.38	1598
1599		true	tr|F1MN04|F1MN04_BOVIN	Uncharacterized protein (Fragment) OS=Bos taurus GN=PAICS PE=4 SV=2	2	Carbamyl, Phospho	8.8	102.7	1	86.5 (M:86.5)	1.9	615.76	1599
1600		true	tr|F1MK99|F1MK99_BOVIN	Uncharacterized protein (Fragment) OS=Bos taurus GN=UNC13A PE=4 SV=2	1	Carbamidomethyl, Carbamyl, Phospho, Glu->pyro-Glu	5.1	196.3	1	86.5 (M:86.5)	0.8	27.52	1600
1601		true	sp|E1BKA3|AJUBA_BOVIN	LIM domain-containing protein ajuba OS=Bos taurus GN=AJUBA PE=3 SV=1	3	Carbamidomethyl, Carbamyl, Phospho, Glu->pyro-Glu	7.1	57.7	1	86.5 (M:86.5)	6.2	32.36	1601
1602		true	tr|Q08DY1|Q08DY1_BOVIN	Bridging integrator 3 OS=Bos taurus GN=BIN3 PE=2 SV=1	3	Carbamyl, Phospho	6.8	29.7	1	86.4 (M:86.4)	8.7	763.12	1602
1603		true	tr|F1MSA6|F1MSA6_BOVIN	Uncharacterized protein OS=Bos taurus GN=KRT34 PE=3 SV=1	2	Phospho	4.9	44.7	2	86.4 (M:86.4)	1.8	14.45	1603
1604		true	tr|E1BF73|E1BF73_BOVIN	Uncharacterized protein OS=Bos taurus GN=CCSER2 PE=4 SV=1	1	Carbamidomethyl, Carbamyl, Phospho	6.3	88.8	1	86.4 (M:86.4)	2.6	32.87	1604
1605		true	sp|E1BBQ2|GP158_BOVIN	Probable G-protein coupled receptor 158 OS=Bos taurus GN=GPR158 PE=3 SV=2	3	Carbamidomethyl, Carbamyl, Oxidation, Phospho	8.7	135.3	1	86.4 (M:86.4)	2.7	744.25	1605
1606		true	tr|A6QNV0|A6QNV0_BOVIN	MSH3 protein OS=Bos taurus GN=MSH3 PE=2 SV=1	2	Carbamyl, Phospho	8.6	104.6	2	86.4 (M:86.4)	1.1	10.43	1606
1607		true	tr|F1N5K2|F1N5K2_BOVIN	Uncharacterized protein OS=Bos taurus GN=TTLL12 PE=4 SV=2	2	Carbamidomethyl, Carbamyl, Carboxymethyl	5.1	75.4	2	86.3 (M:86.3)	2.3	41643.73	1607
1608		true	tr|F1MHG0|F1MHG0_BOVIN	Uncharacterized protein (Fragment) OS=Bos taurus GN=MYO7A PE=4 SV=2	3	Carbamidomethyl, Carbamyl, Phospho	8.8	254.1	1	86.3 (M:86.3)	1.5	517.67	1608
1609		true	tr|F1MY62|F1MY62_BOVIN	Uncharacterized protein OS=Bos taurus GN=LOC512486 PE=4 SV=2	1	Carbamyl, Oxidation, Phospho	5.8	67.5	1	86.3 (M:86.3)	2.5	577.54	1609
1610		true	tr|F1N2N3|F1N2N3_BOVIN	Uncharacterized protein (Fragment) OS=Bos taurus GN=FAM217A PE=4 SV=2	3	Carbamyl, Phospho	6.5	69.9	1	86.2 (M:86.2)	3.4	882.55	1610
1611		true	tr|E1BK26|E1BK26_BOVIN	Harmonin (Fragment) OS=Bos taurus GN=USH1C PE=4 SV=2	1	Carbamidomethyl, Carbamyl, Carboxymethyl, Oxidation	6.8	99.3	1	86.2 (M:86.2)	0.8	61171.74	1611
1612		true	tr|E1BMQ6|E1BMQ6_BOVIN	Calcium-transporting ATPase OS=Bos taurus GN=ATP2A3 PE=3 SV=2	2	Carbamidomethyl, Carbamyl, Carboxymethyl, Phospho	5.3	109.3	1	86.1 (M:86.1)	2.0	1014.52	1612
1613		true	sp|Q2KJ56|HOME1_BOVIN	Homer protein homolog 1 OS=Bos taurus GN=HOMER1 PE=2 SV=1	1	Carbamyl, Phospho, Glu->pyro-Glu	5.4	40.3	1	86.1 (M:86.1)	2.3	79.36	1613
1614		true	tr|G3MZQ1|G3MZQ1_BOVIN	Uncharacterized protein OS=Bos taurus GN=COL20A1 PE=4 SV=1	4	Carbamidomethyl, Carbamyl, Oxidation, Phospho	9.1	133.3	3	86.0 (M:86.0)	4.7	553.10	1614
1615		true	sp|Q0X0C4|HEXI1_BOVIN	Protein HEXIM1 OS=Bos taurus GN=HEXIM1 PE=2 SV=1	2	Carbamidomethyl, Carbamyl, Oxidation, Phospho	5.0	36.3	1	86.0 (M:86.0)	4.1	33.88	1615
1616		true	tr|F1MVN9|F1MVN9_BOVIN	Uncharacterized protein OS=Bos taurus GN=SH3KBP1 PE=4 SV=2	2	Carbamyl, Phospho, Glu->pyro-Glu	7.1	68.5	2	86.0 (M:86.0)	2.4	22.18	1616
1617		true	tr|G3MXJ9|G3MXJ9_BOVIN	Uncharacterized protein OS=Bos taurus GN=EPB41L4B PE=4 SV=1	3	Carbamyl, Phospho, Glu->pyro-Glu	5.8	28.5	1	85.9 (M:85.9)	8.3	510.33	1617
1618		true	tr|E1BNW5|E1BNW5_BOVIN	Uncharacterized protein OS=Bos taurus GN=SH3D19 PE=4 SV=2	3	Carbamidomethyl, Carbamyl, Carboxymethyl, Phospho, Glu->pyro-Glu	8.6	85.1	1	85.9 (M:85.9)	4.3	25924.77	1618
1619		true	tr|F1MFF9|F1MFF9_BOVIN	Uncharacterized protein (Fragment) OS=Bos taurus GN=CHD5 PE=4 SV=2	4	Carbamyl, Phospho	6.0	210.4	1	85.9 (M:85.9)	2.1	527.00	1619
1620		true	sp|P54281|ECLC_BOVIN	Epithelial chloride channel protein OS=Bos taurus PE=2 SV=1	4	Carbamidomethyl, Carbamyl, Carboxymethyl, Oxidation, Phospho	6.6	100.2	2	85.8 (M:85.8)	3.7	18834.45	1620
1621		true	sp|Q29RP1|UBP1_BOVIN	Ubiquitin carboxyl-terminal hydrolase 1 OS=Bos taurus GN=USP1 PE=2 SV=1	2	Carbamidomethyl, Carbamyl, Carboxymethyl, Phospho	5.2	88.4	2	85.8 (M:85.8)	2.4	37.46	1621
1622		true	tr|A6QPS2|A6QPS2_BOVIN	GRAMD1C protein OS=Bos taurus GN=GRAMD1C PE=2 SV=1	3	Carbamidomethyl, Carbamyl, Carboxymethyl, Phospho	9.1	53.7	2	85.8 (M:85.8)	7.1	30783.92	1622
1623		true	tr|E1BN99|E1BN99_BOVIN	Uncharacterized protein OS=Bos taurus GN=ADAMTS15 PE=4 SV=1	2	Carbamyl, Phospho	8.9	101.9	1	85.8 (M:85.8)	1.8	1037.24	1623
1624		true	tr|A0A0B4PJ93|A0A0B4PJ93_SBV	M polyprotein OS=Schmallenberg virus PE=4 SV=1	3	Carbamidomethyl, Carbamyl, Carboxymethyl, Phospho	8.4	158.7	1	85.7 (M:85.7)	3.7	20318.55	1624
1625		true	sp|A2VE29|ITIH5_BOVIN	Inter-alpha-trypsin inhibitor heavy chain H5 OS=Bos taurus GN=ITIH5 PE=2 SV=1	2	Carbamyl, Phospho	8.8	104.3	2	85.7 (M:85.7)	2.4	570.09	1625
1626		true	tr|Q862S0|Q862S0_BOVIN	Similar to thrombin inhibitor (Fragment) OS=Bos taurus PE=2 SV=1	2	Carbamidomethyl, Carbamyl, Carboxymethyl, Phospho	9.3	15.2	1	85.6 (M:85.6)	7.1	41491.16	1626
1627		true	sp|P56966|GGPPS_BOVIN	Geranylgeranyl pyrophosphate synthase OS=Bos taurus GN=GGPS1 PE=1 SV=2	2	Carbamyl, Phospho	5.9	34.9	1	85.6 (M:85.6)	6.7	40.90	1627
1628		true	tr|Q0GNV5|Q0GNV5_HSPV	HSPV130 OS=Horsepox virus PE=4 SV=1	2	Carbamidomethyl, Carbamyl, Oxidation, Phospho	6.0	102.2	18	85.6 (M:85.6)	1.6	575.53	1628
1629		true	sp|P24758|A26_VACCW	Protein A26 OS=Vaccinia virus (strain Western Reserve) GN=VACWR149 PE=1 SV=2	2	Carbamidomethyl, Carbamyl, Phospho	6.4	58.0	33	85.6 (M:85.6)	4.0	836.63	1629
1630		true	tr|F1MDR1|F1MDR1_BOVIN	Uncharacterized protein OS=Bos taurus GN=ZNF831 PE=4 SV=2	1	Carbamidomethyl, Carbamyl, Oxidation, Phospho	8.4	168.7	1	85.6 (M:85.6)	0.6	23.88	1630
1631		true	tr|F1MR60|F1MR60_BOVIN	Tuftelin-interacting protein 11 OS=Bos taurus GN=TFIP11 PE=3 SV=1	3	Carbamyl, Oxidation, Phospho	5.6	96.0	2	85.4 (M:85.4)	3.6	55.96	1631
1632		true	tr|Q3MHQ9|Q3MHQ9_BOVIN	Condensin complex subunit 2 OS=Bos taurus GN=NCAPH PE=2 SV=1	2	Carbamyl, Phospho	4.9	80.6	2	85.4 (M:85.4)	2.5	4.39	1632
1633		true	sp|A0JNP2|SG1D_BOVIN	Secretoglobin family 1D member OS=Bos taurus GN=SCGB1D PE=3 SV=2	2		8.4	11.3	1	85.3 (M:85.3)	19.6	12.26	1633
1634		true	tr|F1N7Q0|F1N7Q0_BOVIN	BTB (POZ) domain containing 12 OS=Bos taurus GN=SLX4 PE=4 SV=2	3	Carbamidomethyl, Carbamyl, Phospho	5.7	197.5	1	85.3 (M:85.3)	2.0	343.11	1634
1635		true	tr|E1BGU8|E1BGU8_BOVIN	Uncharacterized protein OS=Bos taurus GN=KIAA0408 PE=4 SV=1	3	Carbamyl, Oxidation, Phospho	8.9	78.5	1	85.3 (M:85.3)	4.2	596.33	1635
1636		true	sp|Q08E20|ESTD_BOVIN	S-formylglutathione hydrolase OS=Bos taurus GN=ESD PE=2 SV=1	2	Carbamyl, Oxidation, Phospho	6.5	31.5	1	85.3 (M:85.3)	7.8	614.41	1636
1637		true	tr|A5PKD1|A5PKD1_BOVIN	NOP14 protein OS=Bos taurus GN=NOP14 PE=2 SV=1	3	Carbamyl, Phospho	7.0	97.8	1	85.3 (M:85.3)	3.3	419.35	1637
1638		true	tr|F1MQI4|F1MQI4_BOVIN	Uncharacterized protein (Fragment) OS=Bos taurus GN=TIMELESS PE=4 SV=1	2	Carbamyl, Oxidation	5.3	140.3	2	85.3 (M:85.3)	0.7	85.44	1638
1639		true	tr|E1BGV1|E1BGV1_BOVIN	Uncharacterized protein OS=Bos taurus GN=SH2D4B PE=4 SV=2	2	Carbamyl, Oxidation, Phospho	6.0	51.1	2	85.3 (M:85.3)	3.7	1145.96	1639
1640		true	sp|Q08DJ0|RALYL_BOVIN	RNA-binding Raly-like protein OS=Bos taurus GN=RALYL PE=2 SV=1	3	Carbamyl, Oxidation, Phospho	7.7	32.4	2	85.1 (M:85.1)	9.2	667.86	1640
1641		true	tr|E1BBC4|E1BBC4_BOVIN	Uncharacterized protein OS=Bos taurus GN=OPA1 PE=4 SV=2	4	Carbamyl, Phospho, Glu->pyro-Glu	7.6	115.5	1	85.1 (M:85.1)	3.4	56.22	1641
1642		true	tr|F1N643|F1N643_BOVIN	Uncharacterized protein (Fragment) OS=Bos taurus GN=SHROOM3 PE=4 SV=2	4	Carbamyl, Phospho	7.1	203.3	1	85.1 (M:85.1)	1.9	208.68	1642
1643		true	tr|L7YBZ8|L7YBZ8_SBV	M polyprotein OS=Schmallenberg virus PE=4 SV=1	3	Carbamidomethyl, Carbamyl, Phospho	8.4	158.7	1	85.1 (M:85.1)	3.3	35.58	1643
1644		true	sp|Q2TBQ9|KLC3_BOVIN	Kinesin light chain 3 OS=Bos taurus GN=KLC3 PE=2 SV=1	2	Carbamyl, Phospho, Glu->pyro-Glu	6.2	55.5	2	85.0 (M:85.0)	2.4	707.88	1644
1645		true	tr|F1N2G5|F1N2G5_BOVIN	Uncharacterized protein OS=Bos taurus GN=ARHGEF5 PE=4 SV=2	3	Carbamidomethyl, Carbamyl, Phospho	5.4	172.7	1	85.0 (M:85.0)	2.3	541.12	1645
1646		true	sp|Q3ZBK6|LSM4_BOVIN	U6 snRNA-associated Sm-like protein LSm4 OS=Bos taurus GN=LSM4 PE=2 SV=1	4	Carbamidomethyl, Carbamyl, Oxidation	10.0	15.3	1	85.0 (M:85.0)	20.9	856.15	1646
1647		true	tr|E1BJA2|E1BJA2_BOVIN	Uncharacterized protein OS=Bos taurus GN=AIFM1 PE=4 SV=1	2	Carbamyl, Phospho	9.2	66.8	1	85.0 (M:85.0)	5.4	303.20	1647
1648		true	sp|Q9GLM4|TENS1_BOVIN	Tensin-1 OS=Bos taurus GN=TNS1 PE=2 SV=1	3	Carbamyl, Oxidation, Phospho	8.0	183.4	1	84.9 (M:84.9)	1.7	32.45	1648
1649		true	tr|F1MGG8|F1MGG8_BOVIN	Uncharacterized protein OS=Bos taurus GN=IRS4 PE=4 SV=2	2	Carbamyl, Phospho	9.1	133.4	1	84.9 (M:84.9)	1.4	880.90	1649
1650		true	tr|F1MH56|F1MH56_BOVIN	Uncharacterized protein OS=Bos taurus GN=JARID2 PE=4 SV=2	4	Carbamyl, Phospho, Glu->pyro-Glu	9.3	138.1	1	84.9 (M:84.9)	4.6	48.67	1650
1651		true	sp|Q2T9W1|SNX20_BOVIN	Sorting nexin-20 OS=Bos taurus GN=SNX20 PE=2 SV=1	1	Carbamyl, Phospho	9.0	36.1	1	84.9 (M:84.9)	3.5	23.62	1651
1652		true	tr|G3MX26|G3MX26_BOVIN	GTP-binding protein 1 OS=Bos taurus GN=GTPBP1 PE=4 SV=1	2	Carbamidomethyl, Carbamyl, Oxidation, Phospho	6.6	65.9	4	84.8 (M:84.8)	1.2	1199.61	1652
1653		true	sp|A5PKG6|UBE4A_BOVIN	Ubiquitin conjugation factor E4 A OS=Bos taurus GN=UBE4A PE=2 SV=1	1	Carbamidomethyl, Carbamyl, Carboxymethyl	5.2	122.5	1	84.8 (M:84.8)	1.1	31898.38	1653
1654		true	tr|E1BGI2|E1BGI2_BOVIN	Uncharacterized protein OS=Bos taurus GN=CEP170 PE=4 SV=2	2	Carbamyl, Oxidation, Phospho	6.5	175.1	1	84.8 (M:84.8)	1.6	345.10	1654
1655		true	tr|E1BGH5|E1BGH5_BOVIN	Uncharacterized protein OS=Bos taurus GN=SI PE=3 SV=2	1	Carbamyl, Phospho	5.4	208.3	1	84.7 (M:84.7)	1.5	325.90	1655
1656		true	sp|F1N2W9|MCM9_BOVIN	DNA helicase MCM9 OS=Bos taurus GN=MCM9 PE=3 SV=2	4	Carbamyl, Oxidation, Phospho	6.7	126.4	1	84.6 (M:84.6)	4.0	686.71	1656
1657		true	tr|E1B9S6|E1B9S6_BOVIN	Uncharacterized protein OS=Bos taurus GN=WDR78 PE=4 SV=2	1	Carbamyl, Phospho	5.8	95.3	1	84.6 (M:84.6)	0.9	94.25	1657
1658		true	tr|F1MX60|F1MX60_BOVIN	Uncharacterized protein OS=Bos taurus GN=CYFIP2 PE=4 SV=2	2	Carbamidomethyl, Carbamyl, Phospho, Glu->pyro-Glu	6.6	148.4	2	84.4 (M:84.4)	1.9	423.58	1658
1659		true	tr|F1MFJ2|F1MFJ2_BOVIN	Uncharacterized protein (Fragment) OS=Bos taurus GN=ANKRD44 PE=4 SV=2	2	Carbamyl	5.9	109.4	2	84.4 (M:84.4)	0.0	48.26	1659
1660		true	tr|E1BNY8|E1BNY8_BOVIN	Uncharacterized protein OS=Bos taurus GN=GTF3C1 PE=4 SV=2	2	Carbamyl	7.4	236.0	1	84.3 (M:84.3)	1.7	21.76	1660
1661		true	tr|F1MIP7|F1MIP7_BOVIN	Uncharacterized protein OS=Bos taurus GN=ABCC2 PE=3 SV=2	3	Carbamyl, Phospho	8.4	173.4	1	84.3 (M:84.3)	2.3	45.16	1661
1662		true	tr|Q32LE1|Q32LE1_BOVIN	Uncharacterized protein OS=Bos taurus GN=YEATS4 PE=2 SV=1	2	Carbamidomethyl, Carbamyl, Phospho	8.4	26.5	1	84.3 (M:84.3)	4.4	52.46	1662
1663		true	tr|A6QP00|A6QP00_BOVIN	HERC5 protein OS=Bos taurus GN=HERC5 PE=2 SV=1	4	Carbamidomethyl, Carbamyl, Carboxymethyl, Phospho	7.8	108.5	2	84.2 (M:84.2)	3.7	423.00	1663
1664		true	tr|Q58DQ8|Q58DQ8_BOVIN	Putative uncharacterized protein FLJ21128 OS=Bos taurus GN=FLJ21128 PE=2 SV=1	3	Carbamyl, Oxidation, Phospho	8.2	28.9	2	84.2 (M:84.2)	7.9	678.32	1664
1665		true	tr|F1MPD8|F1MPD8_BOVIN	Uncharacterized protein (Fragment) OS=Bos taurus GN=ANKS1B PE=4 SV=2	3	Carbamyl, Phospho	7.4	28.7	1	84.2 (M:84.2)	10.8	535.85	1665
1666		true	tr|F1MZJ5|F1MZJ5_BOVIN	Uncharacterized protein OS=Bos taurus GN=ADAM9 PE=4 SV=2	3	Carbamidomethyl, Carbamyl, Carboxymethyl, Phospho	6.8	88.1	1	84.2 (M:84.2)	5.5	475.97	1666
1667		true	tr|Q08E51|Q08E51_BOVIN	Transmembrane and coiled-coil domain family 2 OS=Bos taurus GN=TMCC2 PE=2 SV=1	3	Carbamyl, Phospho	6.3	76.2	2	84.1 (M:84.1)	5.0	314.28	1667
1668		true	tr|F1N0L2|F1N0L2_BOVIN	Uncharacterized protein OS=Bos taurus GN=UBR5 PE=4 SV=2	4	Carbamidomethyl, Carbamyl, Carboxymethyl, Oxidation, Phospho	5.6	308.9	1	83.9 (M:83.9)	1.4	23818.23	1668
1669		true	tr|E1BNA6|E1BNA6_BOVIN	Uncharacterized protein OS=Bos taurus GN=DOCK8 PE=4 SV=2	2	Carbamidomethyl, Carbamyl, Oxidation	6.5	238.3	1	83.9 (M:83.9)	0.9	15.31	1669
1670		true	tr|E1B755|E1B755_BOVIN	Protein-tyrosine-phosphatase OS=Bos taurus GN=PTPRQ PE=4 SV=2	2	Carbamidomethyl, Carbamyl, Carboxymethyl, Phospho	5.4	256.2	1	83.9 (M:83.9)	1.2	17045.42	1670
1671		true	sp|Q7PCK7|XRRA1_BOVIN	X-ray radiation resistance-associated protein 1 (Fragment) OS=Bos taurus GN=XRRA1 PE=2 SV=2	2	Carbamyl, Phospho	9.8	62.0	1	83.8 (M:83.8)	6.7	39.57	1671
1672		true	sp|P19110|POLG_JAEV5	Genome polyprotein OS=Japanese encephalitis virus (strain SA(v)) PE=3 SV=1	4	Carbamidomethyl, Carbamyl, Carboxymethyl, Oxidation, Phospho	8.7	379.9	7	83.8 (M:83.8)	1.2	15827.07	1672
1673		true	tr|F1MNF9|F1MNF9_BOVIN	Uncharacterized protein OS=Bos taurus GN=MPRIP PE=4 SV=2	2	Carbamidomethyl, Carbamyl, Carboxymethyl, Oxidation, Phospho	6.0	113.9	2	83.8 (M:83.8)	3.0	700.91	1673
1674		true	tr|E1BGF3|E1BGF3_BOVIN	Uncharacterized protein (Fragment) OS=Bos taurus GN=HCFC1 PE=4 SV=2	1	Carbamidomethyl, Carbamyl, Carboxymethyl, Oxidation, Phospho	6.6	204.6	1	83.7 (M:83.7)	0.6	703.07	1674
1675		true	tr|A6QNL5|A6QNL5_BOVIN	PDIA6 protein (Fragment) OS=Bos taurus GN=PDIA6 PE=2 SV=1	1		5.1	49.6	1	83.7 (M:83.7)	3.3	12.27	1675
1676		true	tr|F1MRU6|F1MRU6_BOVIN	Uncharacterized protein (Fragment) OS=Bos taurus GN=SCAPER PE=4 SV=2	1	Gln->pyro-Glu, Carbamyl, Phospho	6.8	158.1	1	83.7 (M:83.7)	1.1	582.94	1676
1677		true	sp|Q9XSA7|CLIC4_BOVIN	Chloride intracellular channel protein 4 OS=Bos taurus GN=CLIC4 PE=2 SV=3	2	Carbamidomethyl, Carbamyl	5.6	28.7	1	83.6 (M:83.6)	8.7	11.61	1677
1678		true	tr|G3N2N5|G3N2N5_BOVIN	Uncharacterized protein OS=Bos taurus GN=FYCO1 PE=4 SV=1	2	Carbamyl, Oxidation	5.0	163.0	3	83.5 (M:83.5)	0.7	889.97	1678
1679		true	sp|Q3T122|EIF3D_BOVIN	Eukaryotic translation initiation factor 3 subunit D OS=Bos taurus GN=EIF3D PE=2 SV=1	3	Carbamyl, Phospho	5.8	63.9	1	83.5 (M:83.5)	4.6	563.99	1679
1680		true	tr|Q8JTT8|Q8JTT8_LSDV	RNA polymerase-associated protein OS=Lumpy skin disease virus GN=LW075 PE=4 SV=1	2	Carbamyl, Glu->pyro-Glu	6.4	94.7	1	83.5 (M:83.5)	2.3	669.29	1680
1681		true	tr|E1BJB8|E1BJB8_BOVIN	Dystrobrevin OS=Bos taurus GN=DTNB PE=3 SV=2	3	Carbamidomethyl, Carbamyl, Carboxymethyl, Phospho	8.4	71.1	1	83.5 (M:83.5)	3.8	38981.76	1681
1682		true	tr|F1MCA3|F1MCA3_BOVIN	Uncharacterized protein OS=Bos taurus GN=MYO16 PE=4 SV=2	2	Carbamidomethyl, Carbamyl, Carboxymethyl, Oxidation	8.6	211.9	1	83.5 (M:83.5)	0.8	40664.43	1682
1683		true	tr|F1MLX0|F1MLX0_BOVIN	Uncharacterized protein OS=Bos taurus GN=FAHD2A PE=4 SV=1	3	Carbamyl, Phospho	6.6	34.5	2	83.5 (M:83.5)	11.1	302.23	1683
1684		true	tr|E1BM25|E1BM25_BOVIN	Uncharacterized protein OS=Bos taurus GN=CFAP46 PE=4 SV=2	2	Carbamidomethyl, Carbamyl, Oxidation, Phospho, Glu->pyro-Glu	6.6	173.5	1	83.4 (M:83.4)	1.4	565.41	1684
1685		true	tr|F1MQ84|F1MQ84_BOVIN	Uncharacterized protein OS=Bos taurus GN=PDE4DIP PE=4 SV=2	2	Oxidation, Phospho	5.3	264.6	3	83.3 (M:83.3)	0.9	461.21	1685
1686		true	tr|E1BFF4|E1BFF4_BOVIN	Kinesin-like protein OS=Bos taurus GN=KIF19 PE=3 SV=2	3	Carbamyl, Phospho	9.0	112.0	1	83.3 (M:83.3)	2.5	1123.69	1686
1687		true	sp|A0JN69|MARH3_BOVIN	E3 ubiquitin-protein ligase MARCH3 OS=Bos taurus GN=MARCH3 PE=2 SV=1	3	Carbamyl, Phospho	8.6	28.5	1	83.3 (M:83.3)	7.5	238.65	1687
1688		true	tr|E1BNT2|E1BNT2_BOVIN	Uncharacterized protein (Fragment) OS=Bos taurus GN=TSC2 PE=4 SV=2	4	Carbamyl, Oxidation, Phospho	6.8	201.2	1	83.2 (M:83.2)	3.3	347.56	1688
1689		true	tr|F1MNK8|F1MNK8_BOVIN	Kinesin-like protein (Fragment) OS=Bos taurus GN=KIF26B PE=3 SV=2	3	Carbamidomethyl, Carbamyl, Oxidation, Phospho	8.6	163.8	2	83.2 (M:83.2)	2.0	555.41	1689
1690		true	tr|F1MEW4|F1MEW4_BOVIN	Cystathionine beta-synthase OS=Bos taurus GN=CBS PE=3 SV=1	2	Carbamidomethyl, Carbamyl, Carboxymethyl, Oxidation	6.0	62.8	2	83.2 (M:83.2)	2.3	8.18	1690
1691		true	tr|F1N7N8|F1N7N8_BOVIN	Ras GTPase-activating protein 1 OS=Bos taurus GN=RASA1 PE=4 SV=2	2	Carbamidomethyl, Carbamyl, Oxidation, Phospho	6.2	115.8	2	83.2 (M:83.2)	3.9	201.23	1691
1692		true	sp|F1MKX4|PSME4_BOVIN	Proteasome activator complex subunit 4 OS=Bos taurus GN=PSME4 PE=1 SV=1	2	Carbamyl, Oxidation, Phospho	6.4	211.5	2	83.2 (M:83.2)	0.4	53.39	1692
1693		true	tr|F1N5F0|F1N5F0_BOVIN	Uncharacterized protein (Fragment) OS=Bos taurus GN=OVCH1 PE=3 SV=2	3	Carbamidomethyl, Carbamyl, Phospho	9.2	117.8	1	83.0 (M:83.0)	3.1	890.58	1693
1694		true	tr|G3X7V4|G3X7V4_BOVIN	Uncharacterized protein (Fragment) OS=Bos taurus GN=LOC530179 PE=3 SV=1	2	Carbamidomethyl, Carbamyl, Phospho	8.4	51.3	1	83.0 (M:83.0)	3.5	37.53	1694
1695		true	tr|E1BM42|E1BM42_BOVIN	Uncharacterized protein OS=Bos taurus GN=KIAA1468 PE=4 SV=1	2	Carbamyl, Phospho	5.2	133.9	1	83.0 (M:83.0)	2.3	646.19	1695
1696		true	tr|G3MYT7|G3MYT7_BOVIN	Uncharacterized protein OS=Bos taurus GN=ST6GALNAC1 PE=4 SV=1	3	Carbamidomethyl, Carbamyl, Carboxymethyl, Oxidation, Phospho	10.1	50.7	2	82.9 (M:82.9)	9.3	664.92	1696
1697		true	tr|F1N6S8|F1N6S8_BOVIN	Uncharacterized protein OS=Bos taurus GN=SRCIN1 PE=4 SV=2	4	Carbamyl, Oxidation, Phospho	9.4	128.6	1	82.8 (M:82.8)	3.9	30.36	1697
1698		true	tr|O02698|O02698_BOVIN	ABC transporter OS=Bos taurus PE=1 SV=1	2	Carbamidomethyl, Carbamyl, Oxidation, Phospho	5.9	257.1	2	82.8 (M:82.8)	0.5	724.44	1698
1699		true	sp|O02810-2|PI4KB_BOVIN	Isoform 2 of Phosphatidylinositol 4-kinase beta OS=Bos taurus GN=PI4KB	3	Carbamidomethyl, Carbamyl, Oxidation, Phospho, Glu->pyro-Glu	6.0	89.7	4	82.6 (M:82.6)	4.6	23.19	1699
1700		true	tr|E1BD13|E1BD13_BOVIN	Uncharacterized protein (Fragment) OS=Bos taurus GN=SNCAIP PE=4 SV=2	4	Carbamyl, Phospho	6.7	101.6	1	82.6 (M:82.6)	4.0	517.21	1700
1701		true	sp|Q9MZL7-2|CACB1_BOVIN	Isoform 2 of Voltage-dependent L-type calcium channel subunit beta-1 OS=Bos taurus GN=CACNB1	3	Carbamyl, Phospho	9.4	53.1	8	82.5 (M:82.5)	7.1	59.88	1701
1702		true	tr|G5E6K6|G5E6K6_BOVIN	Uncharacterized protein OS=Bos taurus GN=FNBP1 PE=4 SV=1	2	Carbamidomethyl, Carbamyl, Phospho	5.7	60.1	2	82.5 (M:82.5)	1.9	40.30	1702
1703		true	tr|G3MZX0|G3MZX0_BOVIN	Uncharacterized protein (Fragment) OS=Bos taurus GN=PPP1R12B PE=4 SV=1	3	Carbamyl, Phospho	8.8	98.0	2	82.5 (M:82.5)	2.9	573.22	1703
1704		true	tr|G0XSG3|G0XSG3_COWPX	Putative uncharacterized protein OS=Cowpox virus GN=CPXV_AUS1999_867_073 PE=4 SV=1	2	Carbamidomethyl, Carbamyl, Carboxymethyl, Oxidation, Phospho	6.7	77.5	2	82.4 (M:82.4)	2.6	37.42	1704
1705		true	tr|F1MLI5|F1MLI5_BOVIN	Uncharacterized protein (Fragment) OS=Bos taurus GN=KCNK10 PE=3 SV=1	4	Carbamidomethyl, Carbamyl, Carboxymethyl, Phospho	9.2	58.4	1	82.4 (M:82.4)	9.3	403.94	1705
1706		true	tr|E1BKT0|E1BKT0_BOVIN	Uncharacterized protein OS=Bos taurus GN=LUZP1 PE=4 SV=2	2	Carbamyl, Phospho	8.7	114.0	1	82.4 (M:82.4)	1.8	31.58	1706
1707		true	tr|E1BNH8|E1BNH8_BOVIN	Uncharacterized protein OS=Bos taurus GN=PBRM1 PE=4 SV=2	2	Carbamyl, Oxidation, Phospho	6.4	189.7	2	82.4 (M:82.4)	1.2	751.45	1707
1708		true	tr|E1B725|E1B725_BOVIN	Uncharacterized protein OS=Bos taurus GN=GLA PE=3 SV=2	3		5.6	49.8	1	82.4 (M:82.4)	8.0	9.41	1708
1709		true	tr|E1BLR1|E1BLR1_BOVIN	Uncharacterized protein OS=Bos taurus GN=SPATA2 PE=4 SV=1	4	Carbamyl, Phospho	8.9	57.3	1	82.3 (M:82.3)	5.6	753.48	1709
1710		true	tr|G3N067|G3N067_BOVIN	Uncharacterized protein OS=Bos taurus GN=CCDC138 PE=4 SV=1	3	Carbamidomethyl, Carbamyl, Oxidation, Phospho	8.7	77.5	2	82.3 (M:82.3)	5.9	720.57	1710
1711		true	tr|Q862J7|Q862J7_BOVIN	Similar to cyclophilin B (Fragment) OS=Bos taurus PE=2 SV=1	3	Carbamyl, Oxidation, Phospho	9.7	11.0	1	82.3 (M:82.3)	26.0	468.84	1711
1712		true	sp|P36225-2|MAP4_BOVIN	Isoform 2 of Microtubule-associated protein 4 OS=Bos taurus GN=MAP4	3	Carbamyl, Oxidation, Phospho	4.7	107.5	8	82.3 (M:82.3)	3.0	411.90	1712
1713		true	tr|N0E6I4|N0E6I4_BOVIN	Casein kinase II subunit beta OS=Bos taurus GN=Csnk2b-Ly6g5b PE=2 SV=1	3	Carbamidomethyl, Carbamyl, Carboxymethyl, Oxidation, Phospho	4.3	16.9	8	82.3 (M:82.3)	34.0	16936.49	1713
1714		true	tr|A5PK42|A5PK42_BOVIN	TTC25 protein OS=Bos taurus GN=TTC25 PE=2 SV=1	1	Carbamyl, Glu->pyro-Glu	5.6	78.3	1	82.2 (M:82.2)	1.2	17.76	1714
1715		true	sp|P15690|NDUS1_BOVIN	NADH-ubiquinone oxidoreductase 75 kDa subunit, mitochondrial OS=Bos taurus GN=NDUFS1 PE=1 SV=1	4	Carbamidomethyl, Carbamyl, Carboxymethyl, Oxidation, Phospho	5.8	79.4	1	82.2 (M:82.2)	3.4	19856.24	1715
1716		true	tr|E1BI28|E1BI28_BOVIN	Uncharacterized protein OS=Bos taurus GN=GM2A PE=4 SV=1	2		5.3	20.9	1	82.1 (M:82.1)	9.3	12.48	1716
1717		true	tr|E1BCV4|E1BCV4_BOVIN	Uncharacterized protein OS=Bos taurus GN=NUP98 PE=4 SV=2	1	Carbamidomethyl, Carbamyl, Carboxymethyl, Oxidation, Phospho	5.7	197.5	1	82.1 (M:82.1)	1.0	5.05	1717
1718		true	tr|A6QNZ5|A6QNZ5_BOVIN	MGC151537 protein OS=Bos taurus GN=MGC151537 PE=2 SV=1	2	Phospho	9.6	86.2	2	82.1 (M:82.1)	1.3	875.95	1718
1719		true	sp|Q8WN96|ITPR2_BOVIN	Inositol 1,4,5-trisphosphate receptor type 2 OS=Bos taurus GN=ITPR2 PE=2 SV=1	3	Carbamyl, Phospho	6.0	307.6	2	82.0 (M:82.0)	1.0	821.49	1719
1720		true	sp|Q2NL05|KIF2A_BOVIN	Kinesin-like protein KIF2A OS=Bos taurus GN=KIF2A PE=2 SV=1	3	Carbamyl, Oxidation, Phospho	6.1	74.9	3	81.9 (M:81.9)	5.0	725.38	1720
1721		true	tr|F1N0D3|F1N0D3_BOVIN	Receptor protein-tyrosine kinase OS=Bos taurus GN=AXL PE=4 SV=2	5	Carbamidomethyl, Carbamyl, Carboxymethyl, Oxidation, Phospho	5.5	98.2	1	81.9 (M:81.9)	6.2	21802.94	1721
1722		true	sp|Q2KJE5|G3PT_BOVIN	Glyceraldehyde-3-phosphate dehydrogenase, testis-specific OS=Bos taurus GN=GAPDHS PE=2 SV=1	3	Carbamyl, Phospho	8.3	43.3	1	81.8 (M:81.8)	6.6	702.73	1722
1723		true	tr|E1BJV7|E1BJV7_BOVIN	Uncharacterized protein OS=Bos taurus GN=ZNF618 PE=4 SV=2	1	Carbamidomethyl, Carbamyl, Carboxymethyl, Phospho, Glu->pyro-Glu	6.6	101.6	1	81.8 (M:81.8)	1.8	27677.00	1723
1724		true	tr|F1N6C1|F1N6C1_BOVIN	Uncharacterized protein (Fragment) OS=Bos taurus GN=LRRK1 PE=4 SV=1	2	Carbamidomethyl, Carbamyl, Oxidation, Phospho	6.2	221.4	2	81.7 (M:81.7)	0.9	697.69	1724
1725		true	tr|E1BM95|E1BM95_BOVIN	Uncharacterized protein (Fragment) OS=Bos taurus GN=SCLT1 PE=4 SV=2	3	Carbamyl, Phospho	5.6	60.3	1	81.6 (M:81.6)	3.5	711.59	1725
1726		true	sp|Q3T054|RAN_BOVIN	GTP-binding nuclear protein Ran OS=Bos taurus GN=RAN PE=2 SV=3	3	Carbamyl, Phospho	7.0	24.4	3	81.6 (M:81.6)	13.4	644.04	1726
1727		true	tr|F1MEA6|F1MEA6_BOVIN	DIS3-like exonuclease 1 OS=Bos taurus GN=DIS3L PE=3 SV=2	3	Carbamidomethyl, Carbamyl, Carboxymethyl, Oxidation, Phospho	6.0	120.5	2	81.6 (M:81.6)	1.4	31161.54	1727
1728		true	sp|Q2KIU7|RSPH9_BOVIN	Radial spoke head protein 9 homolog OS=Bos taurus GN=RSPH9 PE=2 SV=1	2	Carbamyl, Oxidation, Phospho, Glu->pyro-Glu	5.4	31.3	1	81.6 (M:81.6)	4.0	558.15	1728
1729		true	tr|E1B8F6|E1B8F6_BOVIN	Uncharacterized protein OS=Bos taurus GN=PEX6 PE=3 SV=1	3	Carbamidomethyl, Carbamyl, Carboxymethyl, Oxidation, Phospho	6.2	103.7	1	81.5 (M:81.5)	3.1	49406.26	1729
1730		true	tr|E1BN72|E1BN72_BOVIN	Uncharacterized protein OS=Bos taurus GN=NIM1K PE=4 SV=1	3	Carbamidomethyl, Carbamyl, Carboxymethyl, Oxidation, Phospho	8.3	49.4	1	81.5 (M:81.5)	4.6	19363.94	1730
1731		true	tr|F1MEC7|F1MEC7_BOVIN	Uncharacterized protein OS=Bos taurus GN=NARF PE=4 SV=1	2	Carbamidomethyl, Gln->pyro-Glu, Carbamyl, Carboxymethyl, Phospho	6.0	50.8	2	81.5 (M:81.5)	5.9	34250.62	1731
1732		true	tr|F1MBU9|F1MBU9_BOVIN	Uncharacterized protein (Fragment) OS=Bos taurus GN=PIK3C2B PE=4 SV=2	1	Carbamyl, Oxidation, Phospho	6.8	184.9	1	81.4 (M:81.4)	0.5	42.90	1732
1733		true	sp|Q3SZ65|IF4A2_BOVIN	Eukaryotic initiation factor 4A-II OS=Bos taurus GN=EIF4A2 PE=2 SV=1	1	Phospho	5.3	46.4	1	81.4 (M:81.4)	3.4	10.47	1733
1734		true	tr|E1B9Y4|E1B9Y4_BOVIN	Uncharacterized protein OS=Bos taurus GN=C16orf46 PE=4 SV=1	3	Carbamyl, Phospho	8.6	43.9	1	81.4 (M:81.4)	8.9	655.61	1734
1735		true	sp|P48820|RBP2_BOVIN	E3 SUMO-protein ligase RanBP2 (Fragment) OS=Bos taurus GN=RANBP2 PE=2 SV=2	2	Carbamyl, Phospho	5.0	120.4	1	81.2 (M:81.2)	1.9	28.69	1735
1736		true	tr|E1BNG9|E1BNG9_BOVIN	Uncharacterized protein (Fragment) OS=Bos taurus GN=BRIP1 PE=4 SV=2	2	Carbamidomethyl, Carbamyl, Carboxymethyl, Phospho	6.7	123.1	3	81.2 (M:81.2)	2.8	21522.10	1736
1737		true	tr|E1BKL4|E1BKL4_BOVIN	Uncharacterized protein OS=Bos taurus GN=CILP2 PE=4 SV=1	2	Carbamidomethyl, Carbamyl, Oxidation, Phospho	8.7	126.3	1	81.2 (M:81.2)	2.1	832.91	1737
1738		true	tr|F1MDU9|F1MDU9_BOVIN	Uncharacterized protein OS=Bos taurus GN=HEATR1 PE=4 SV=2	3	Carbamyl	6.2	242.1	1	81.2 (M:81.2)	1.1	1047.53	1738
1739		true	sp|P27595|HXK1_BOVIN	Hexokinase-1 OS=Bos taurus GN=HK1 PE=2 SV=1	1	Carbamyl, Oxidation, Phospho	6.6	103.0	1	81.2 (M:81.2)	0.9	1122.71	1739
1740		true	tr|D1Z306|D1Z306_BOVIN	Cysteine-rich secretory protein LCCL domain containing 2 OS=Bos taurus GN=CRISPLD2 PE=2 SV=1	2	Carbamyl	8.7	55.5	1	81.1 (M:81.1)	4.6	773.38	1740
1741		true	tr|Q08DU6|Q08DU6_BOVIN	B lymphoid tyrosine kinase OS=Bos taurus GN=BLK PE=2 SV=1	3	Gln->pyro-Glu, Carbamyl, Phospho	7.6	56.9	1	81.1 (M:81.1)	4.0	978.22	1741
1742		true	sp|A6QQZ0|GDAP1_BOVIN	Ganglioside-induced differentiation-associated protein 1 OS=Bos taurus GN=GDAP1 PE=2 SV=1	4	Carbamyl, Oxidation, Phospho	8.9	41.2	1	81.1 (M:81.1)	7.5	293.30	1742
1743		true	tr|Q3ZBL3|Q3ZBL3_BOVIN	Inositol hexakisphosphate kinase 2 OS=Bos taurus GN=IP6K2 PE=2 SV=1	1	Carbamidomethyl, Carbamyl, Oxidation, Phospho	6.0	48.9	1	81.1 (M:81.1)	2.4	813.55	1743
1744		true	tr|Q08DC3|Q08DC3_BOVIN	KIAA1949 OS=Bos taurus GN=KIAA1949 PE=2 SV=1	2	Carbamyl, Phospho	5.6	66.9	1	81.1 (M:81.1)	6.2	266.00	1744
1745		true	tr|F1MSS8|F1MSS8_BOVIN	Uncharacterized protein OS=Bos taurus GN=ZNF532 PE=4 SV=2	1	Carbamyl, Phospho	9.0	140.8	1	81.0 (M:81.0)	1.1	43.92	1745
1746		true	tr|E1BCU6|E1BCU6_BOVIN	Uncharacterized protein OS=Bos taurus GN=TCN1 PE=1 SV=1	3	Oxidation	6.4	47.2	1	81.0 (M:81.0)	6.6	22.30	1746
1747		true	tr|E1BDZ4|E1BDZ4_BOVIN	Uncharacterized protein OS=Bos taurus GN=NLRP14 PE=4 SV=2	3	Carbamidomethyl, Carbamyl, Carboxymethyl, Oxidation, Phospho	5.6	124.9	1	81.0 (M:81.0)	1.9	20495.53	1747
1748		true	tr|Q3T0N2|Q3T0N2_BOVIN	Lysine--tRNA ligase OS=Bos taurus GN=KARS PE=2 SV=1	3	Carbamyl, Oxidation	6.3	71.3	2	80.9 (M:80.9)	4.2	690.11	1748
1749		true	tr|F1MM78|F1MM78_BOVIN	Uncharacterized protein OS=Bos taurus GN=ZCCHC8 PE=4 SV=2	2	Carbamidomethyl, Carbamyl, Carboxymethyl, Oxidation, Phospho	4.8	79.0	1	80.9 (M:80.9)	5.2	250.78	1749
1750		true	tr|F1MYY8|F1MYY8_BOVIN	Uncharacterized protein OS=Bos taurus GN=GTF3C5 PE=4 SV=2	2	Carbamyl, Phospho	8.2	60.0	1	80.9 (M:80.9)	2.3	460.54	1750
1751		true	sp|Q27958|DPOLB_BOVIN	DNA polymerase beta OS=Bos taurus GN=POLB PE=2 SV=3	2	Carbamyl, Phospho	9.1	38.2	1	80.8 (M:80.8)	6.3	43.92	1751
1752		true	sp|Q2YDJ0|NUSAP_BOVIN	Nucleolar and spindle-associated protein 1 OS=Bos taurus GN=NUSAP1 PE=2 SV=1	3	Carbamyl, Phospho, Glu->pyro-Glu	10.1	52.3	1	80.8 (M:80.8)	4.3	790.49	1752
1753		true	tr|E1B9B6|E1B9B6_BOVIN	Uncharacterized protein OS=Bos taurus GN=NUAK1 PE=4 SV=1	1	Carbamidomethyl, Carbamyl, Phospho	9.0	74.0	1	80.8 (M:80.8)	2.0	61.21	1753
1754		true	tr|E1BHF6|E1BHF6_BOVIN	Uncharacterized protein OS=Bos taurus GN=SIPA1L3 PE=4 SV=2	1	Carbamidomethyl, Carbamyl	8.7	196.8	1	80.8 (M:80.8)	0.5	5.32	1754
1755		true	sp|Q32LA7|H2AV_BOVIN	Histone H2A.V OS=Bos taurus GN=H2AFV PE=2 SV=3	2	Carbamyl, Phospho	10.6	13.5	3	80.8 (M:80.8)	18.0	443.32	1755
1756		true	tr|F6RBT3|F6RBT3_BOVIN	Uncharacterized protein OS=Bos taurus GN=LRPAP1 PE=1 SV=1	3		7.0	41.9	2	80.8 (M:80.8)	9.1	12.21	1756
1757		true	tr|G3MZC0|G3MZC0_BOVIN	Uncharacterized protein (Fragment) OS=Bos taurus PE=4 SV=1	3	Carbamyl, Phospho	7.7	54.8	2	80.8 (M:80.8)	6.2	564.95	1757
1758		true	tr|A5D9H1|A5D9H1_BOVIN	Inositol(Myo)-1(Or 4)-monophosphatase 1 OS=Bos taurus GN=IMPA1 PE=2 SV=1	3	Carbamidomethyl, Carbamyl, Oxidation	5.0	30.0	2	80.7 (M:80.7)	11.6	671.58	1758
1759		true	tr|E1BFY8|E1BFY8_BOVIN	Uncharacterized protein OS=Bos taurus GN=LGI3 PE=4 SV=2	2	Carbamidomethyl, Carbamyl, Carboxymethyl, Oxidation, Phospho	8.7	60.4	1	80.6 (M:80.6)	3.3	18351.24	1759
1760		true	sp|Q3ZC49|LRC39_BOVIN	Leucine-rich repeat-containing protein 39 OS=Bos taurus GN=LRRC39 PE=2 SV=1	2	Carbamidomethyl, Carbamyl, Oxidation, Phospho	5.7	38.8	1	80.6 (M:80.6)	5.1	34.40	1760
1761		true	tr|F1MAV4|F1MAV4_BOVIN	Uncharacterized protein OS=Bos taurus GN=BARD1 PE=4 SV=2	1	Carbamidomethyl, Carbamyl, Phospho	8.9	85.7	1	80.6 (M:80.6)	0.9	63.12	1761
1762		true	tr|F1N1Q8|F1N1Q8_BOVIN	Uncharacterized protein (Fragment) OS=Bos taurus GN=LNPEP PE=4 SV=2	2	Carbamyl, Oxidation, Phospho	5.6	116.8	1	80.6 (M:80.6)	0.7	20.93	1762
1763		true	tr|A8E4P2|A8E4P2_BOVIN	FARSB protein OS=Bos taurus GN=FARSB PE=2 SV=1	4	Carbamidomethyl, Carbamyl, Oxidation, Phospho	7.2	66.3	1	80.6 (M:80.6)	7.1	769.22	1763
1764		true	tr|A4IFE6|A4IFE6_BOVIN	ABCE1 protein OS=Bos taurus GN=ABCE1 PE=2 SV=1	3	Carbamyl, Phospho	8.6	67.2	1	80.6 (M:80.6)	4.7	531.13	1764
1765		true	sp|Q2HJE4|UBP15_BOVIN	Ubiquitin carboxyl-terminal hydrolase 15 OS=Bos taurus GN=USP15 PE=2 SV=1	4	Carbamidomethyl, Carbamyl, Carboxymethyl, Oxidation, Phospho	5.0	109.4	1	80.6 (M:80.6)	4.4	14608.75	1765
1766		true	tr|A4IFJ9|A4IFJ9_BOVIN	ATP6V1C2 protein OS=Bos taurus GN=ATP6V1C2 PE=2 SV=1	3	Carbamyl, Oxidation, Phospho	6.4	48.7	1	80.5 (M:80.5)	3.5	452.51	1766
1767		true	tr|G3N0Q6|G3N0Q6_BOVIN	Uncharacterized protein OS=Bos taurus GN=SIGLEC5 PE=4 SV=1	2	Carbamidomethyl	5.4	60.7	2	80.5 (M:80.5)	5.4	13.73	1767
1768		true	tr|F1MCL3|F1MCL3_BOVIN	Uncharacterized protein OS=Bos taurus GN=GRIN2B PE=4 SV=2	3	Carbamidomethyl, Carbamyl, Oxidation, Phospho	6.4	166.7	1	80.5 (M:80.5)	1.3	664.99	1768
1769		true	tr|F1MJ31|F1MJ31_BOVIN	Uncharacterized protein OS=Bos taurus GN=AK9 PE=4 SV=2	2	Carbamidomethyl, Carbamyl, Carboxymethyl, Oxidation, Phospho	4.9	220.8	3	80.5 (M:80.5)	0.8	13.54	1769
1770		true	tr|E1BCE0|E1BCE0_BOVIN	Uncharacterized protein (Fragment) OS=Bos taurus GN=DNAJC8 PE=4 SV=2	2	Carbamyl, Phospho	9.2	30.7	1	80.4 (M:80.4)	6.9	53.86	1770
1771		true	tr|F1MUE0|F1MUE0_BOVIN	Uncharacterized protein (Fragment) OS=Bos taurus GN=KCNT1 PE=4 SV=2	1	Carbamidomethyl, Carboxymethyl, Oxidation	7.2	134.3	1	80.4 (M:80.4)	0.8	19.86	1771
1772		true	tr|E1BJL3|E1BJL3_BOVIN	Uncharacterized protein OS=Bos taurus GN=BACH1 PE=4 SV=1	2	Carbamidomethyl, Carbamyl, Carboxymethyl, Phospho	5.0	81.7	1	80.4 (M:80.4)	3.8	24689.39	1772
1773		true	sp|P12641|GB_BHV2B	Envelope glycoprotein B OS=Bovine herpesvirus 2 (strain BMV) PE=3 SV=2	3	Carbamyl, Oxidation, Phospho, Glu->pyro-Glu	6.7	101.8	1	80.4 (M:80.4)	2.9	503.03	1773
1774		true	tr|E1BMA8|E1BMA8_BOVIN	Dystrobrevin OS=Bos taurus GN=DTNA PE=3 SV=2	2	Gln->pyro-Glu, Carbamyl, Oxidation	6.6	83.7	2	80.4 (M:80.4)	0.9	1248.24	1774
1775		true	tr|U5T990|U5T990_COWPX	CPXV036 protein OS=Cowpox virus GN=CPXV036 PE=4 SV=1	2	Carbamidomethyl, Carbamyl, Carboxymethyl, Oxidation, Phospho, Glu->pyro-Glu	9.1	26.9	19	80.4 (M:80.4)	7.4	25805.66	1775
1776		true	tr|G3N0S0|G3N0S0_BOVIN	Uncharacterized protein OS=Bos taurus GN=UIMC1 PE=4 SV=1	3	Carbamidomethyl, Carbamyl, Carboxymethyl, Phospho	5.5	80.8	2	80.3 (M:80.3)	4.7	23129.67	1776
1777		true	tr|A6QPP3|A6QPP3_BOVIN	Fibroblast growth factor OS=Bos taurus GN=FGF13 PE=2 SV=1	2	Carbamyl, Oxidation, Phospho, Glu->pyro-Glu	8.8	28.8	2	80.3 (M:80.3)	3.9	960.01	1777
1778		true	tr|A7MB37|A7MB37_BOVIN	AKAP8 protein OS=Bos taurus GN=AKAP8 PE=2 SV=1	3	Carbamidomethyl, Carbamyl, Carboxymethyl, Oxidation, Phospho, Glu->pyro-Glu	5.0	75.1	2	80.2 (M:80.2)	4.1	35.34	1778
1779		true	tr|F1MZA7|F1MZA7_BOVIN	Uncharacterized protein OS=Bos taurus GN=URB1 PE=4 SV=2	3	Carbamyl, Phospho	6.3	251.6	1	80.2 (M:80.2)	1.7	657.35	1779
1780		true	tr|A8KC77|A8KC77_BOVIN	EIF5 protein (Fragment) OS=Bos taurus GN=EIF5 PE=2 SV=1	3	Carbamyl, Oxidation, Phospho	5.0	34.5	2	80.2 (M:80.2)	6.7	678.92	1780
1781		true	tr|F1N0Q0|F1N0Q0_BOVIN	Uncharacterized protein OS=Bos taurus GN=LRRC48 PE=4 SV=2	2	Carbamyl, Phospho	4.6	60.8	2	80.2 (M:80.2)	3.1	1060.61	1781
1782		true	tr|F1MX73|F1MX73_BOVIN	Uncharacterized protein (Fragment) OS=Bos taurus GN=MIPEP PE=3 SV=1	3	Carbamyl, Oxidation, Phospho	7.9	81.0	1	80.2 (M:80.2)	3.4	812.36	1782
1783		true	tr|E1BN28|E1BN28_BOVIN	Uncharacterized protein OS=Bos taurus GN=FMN2 PE=4 SV=2	3	Carbamidomethyl, Gln->pyro-Glu, Carbamyl, Oxidation, Phospho	6.0	150.3	1	80.2 (M:80.2)	1.9	533.20	1783
1784		true	tr|E1B9X0|E1B9X0_BOVIN	Sodium channel protein OS=Bos taurus GN=SCN4A PE=3 SV=2	2	Gln->pyro-Glu, Carbamyl, Phospho	5.0	207.2	1	80.1 (M:80.1)	1.5	597.73	1784
1785		true	tr|E1BPX6|E1BPX6_BOVIN	DNA-directed RNA polymerase OS=Bos taurus GN=POLR3B PE=3 SV=1	3	Carbamyl, Oxidation, Phospho	8.8	127.7	1	80.0 (M:80.0)	2.8	492.39	1785
1786		true	tr|E1BPL5|E1BPL5_BOVIN	Uncharacterized protein OS=Bos taurus GN=KDM4A PE=4 SV=1	3	Carbamidomethyl, Carbamyl, Carboxymethyl, Oxidation, Phospho	5.5	120.8	1	80.0 (M:80.0)	1.8	35908.51	1786
1787		true	sp|A4IF97|ML12B_BOVIN	Myosin regulatory light chain 12B OS=Bos taurus GN=MYL12B PE=2 SV=1	2		4.7	19.7	4	80.0 (M:80.0)	11.7	11.50	1787
1788		true	tr|F1MWN8|F1MWN8_BOVIN	Uncharacterized protein (Fragment) OS=Bos taurus GN=CFAP58 PE=4 SV=1	2	Carbamyl, Oxidation, Phospho	7.4	104.0	1	79.9 (M:79.9)	2.2	524.36	1788
1789		true	tr|F1MP88|F1MP88_BOVIN	Uncharacterized protein OS=Bos taurus GN=DACT1 PE=4 SV=2	2	Carbamyl, Phospho, Glu->pyro-Glu	9.1	90.2	1	79.9 (M:79.9)	2.5	673.04	1789
1790		true	tr|G1EUQ2|G1EUQ2_BHV4	Putative uncharacterized protein ORF 17 OS=Bovine herpesvirus 4 GN=ORF 17 PE=4 SV=1	3	Carbamyl, Phospho	6.4	57.4	3	79.9 (M:79.9)	4.5	569.70	1790
1791		true	tr|F1MF57|F1MF57_BOVIN	Uncharacterized protein OS=Bos taurus GN=NEBL PE=4 SV=2	2	Carbamyl, Phospho	8.4	116.6	1	79.9 (M:79.9)	1.9	863.64	1791
1792		true	tr|E1BE55|E1BE55_BOVIN	Uncharacterized protein OS=Bos taurus GN=SUGP2 PE=4 SV=1	3	Carbamyl, Oxidation, Phospho	6.0	121.5	1	79.8 (M:79.8)	2.5	69.88	1792
1793		true	tr|F1MVP6|F1MVP6_BOVIN	Uncharacterized protein (Fragment) OS=Bos taurus PE=4 SV=2	3	Oxidation, Phospho	4.9	186.5	2	79.8 (M:79.8)	2.0	830.34	1793
1794		true	tr|F1MPU1|F1MPU1_BOVIN	Uncharacterized protein (Fragment) OS=Bos taurus GN=MED12L PE=4 SV=2	1	Carbamyl, Phospho	8.1	242.8	1	79.8 (M:79.8)	0.5	859.43	1794
1795		true	tr|F1MS14|F1MS14_BOVIN	Uncharacterized protein OS=Bos taurus GN=ICE1 PE=4 SV=2	2	Carbamyl, Oxidation, Phospho	5.4	230.8	1	79.8 (M:79.8)	1.1	712.38	1795
1796		true	tr|G0XTA9|G0XTA9_COWPX	Ser/thr kinase OS=Cowpox virus GN=CPXV_FIN2000_MAN_054 PE=4 SV=1	2	Carbamyl, Phospho	7.2	52.1	9	79.8 (M:79.8)	4.6	818.46	1796
1797		true	tr|E1BP42|E1BP42_BOVIN	Uncharacterized protein (Fragment) OS=Bos taurus GN=CSAD PE=3 SV=2	3	Carbamyl, Oxidation	7.9	64.3	2	79.8 (M:79.8)	3.1	422.34	1797
1798		true	tr|A5D7N6|A5D7N6_BOVIN	Kinesin-like protein OS=Bos taurus GN=KIF23 PE=2 SV=1	2	Carbamyl, Phospho	8.6	109.0	1	79.7 (M:79.7)	2.0	576.54	1798
1799		true	tr|F1MRP4|F1MRP4_BOVIN	Uncharacterized protein OS=Bos taurus GN=SYT10 PE=4 SV=2	3	Carbamidomethyl, Carbamyl, Carboxymethyl, Oxidation, Phospho	7.6	59.1	1	79.7 (M:79.7)	4.0	29659.96	1799
1800		true	sp|Q2TBG8|UCHL3_BOVIN	Ubiquitin carboxyl-terminal hydrolase isozyme L3 OS=Bos taurus GN=UCHL3 PE=2 SV=1	2		4.8	26.2	1	79.7 (M:79.7)	11.7	11.78	1800
1801		true	tr|Q3SYT9|Q3SYT9_BOVIN	Poly(RC) binding protein 2 OS=Bos taurus GN=PCBP2 PE=2 SV=1	3	Carbamidomethyl, Carbamyl, Carboxymethyl, Oxidation, Phospho	6.6	36.8	2	79.7 (M:79.7)	11.5	20062.93	1801
1802		true	tr|E1BGJ4|E1BGJ4_BOVIN	Alpha-mannosidase OS=Bos taurus GN=MAN2A2 PE=3 SV=1	3	Carbamidomethyl	6.6	130.1	1	79.7 (M:79.7)	2.6	7.91	1802
1803		true	tr|E1BN37|E1BN37_BOVIN	Uncharacterized protein OS=Bos taurus GN=MARCH9 PE=4 SV=1	4	Oxidation, Phospho	9.3	37.6	1	79.6 (M:79.6)	5.2	1004.80	1803
1804		true	tr|E1BN47|E1BN47_BOVIN	Cytoplasmic FMR1-interacting protein 1 OS=Bos taurus GN=CYFIP1 PE=4 SV=2	3	Carbamyl, Oxidation, Phospho	6.3	148.7	1	79.6 (M:79.6)	1.9	668.66	1804
1805		true	sp|E1BB52|CDK13_BOVIN	Cyclin-dependent kinase 13 OS=Bos taurus GN=CDK13 PE=3 SV=1	3	Carbamyl, Phospho	9.7	164.6	1	79.6 (M:79.6)	1.9	770.90	1805
1806		true	tr|E1BPP2|E1BPP2_BOVIN	Uncharacterized protein OS=Bos taurus GN=BMS1 PE=4 SV=1	3	Carbamyl, Oxidation, Phospho	5.9	147.1	1	79.6 (M:79.6)	2.3	396.29	1806
1807		true	tr|F1MW73|F1MW73_BOVIN	Uncharacterized protein OS=Bos taurus GN=MGC148692 PE=4 SV=2	4	Carbamidomethyl, Carbamyl, Carboxymethyl	6.5	138.4	1	79.5 (M:79.5)	1.9	29867.49	1807
1808		true	tr|G3MZK3|G3MZK3_BOVIN	Janus kinase and microtubule-interacting protein 1 OS=Bos taurus GN=JAKMIP1 PE=4 SV=1	4	Carbamyl, Oxidation, Phospho	5.5	97.8	2	79.5 (M:79.5)	4.6	592.66	1808
1809		true	tr|F1MJ20|F1MJ20_BOVIN	Uncharacterized protein (Fragment) OS=Bos taurus GN=ARHGAP28 PE=4 SV=2	3	Carbamyl, Oxidation, Phospho	8.9	79.3	1	79.5 (M:79.5)	5.5	558.83	1809
1810		true	sp|P43481|KIT_BOVIN	Mast/stem cell growth factor receptor Kit OS=Bos taurus GN=KIT PE=2 SV=1	3	Carbamidomethyl, Carbamyl, Oxidation, Phospho, Glu->pyro-Glu	6.4	109.6	3	79.4 (M:79.4)	4.7	742.11	1810
1811		true	tr|E1B718|E1B718_BOVIN	Uncharacterized protein OS=Bos taurus GN=FMNL3 PE=4 SV=2	2	Carbamyl, Phospho	6.6	111.1	1	79.4 (M:79.4)	1.6	90.86	1811
1812		true	tr|A4FV92|A4FV92_BOVIN	CYP27A1 protein OS=Bos taurus GN=CYP27A1 PE=2 SV=1	2	Carbamyl, Phospho	9.3	60.3	1	79.4 (M:79.4)	4.5	547.72	1812
1813		true	tr|F1N0D6|F1N0D6_BOVIN	Tyrosine-protein kinase (Fragment) OS=Bos taurus GN=JAK1 PE=3 SV=2	2	Carbamyl, Phospho, Glu->pyro-Glu	7.4	133.6	2	79.4 (M:79.4)	1.4	530.53	1813
1814		true	sp|Q3T0K2|TCPG_BOVIN	T-complex protein 1 subunit gamma OS=Bos taurus GN=CCT3 PE=1 SV=1	3	Oxidation, Phospho	6.4	60.5	3	79.3 (M:79.3)	4.8	64.82	1814
1815		true	tr|Q24K07|Q24K07_BOVIN	Vacuolar protein sorting 11 homolog (S. cerevisiae) OS=Bos taurus GN=VPS11 PE=2 SV=1	2	Carbamyl, Phospho	6.4	107.5	2	79.3 (M:79.3)	1.2	66.76	1815
1816		true	tr|E1BFI1|E1BFI1_BOVIN	Uncharacterized protein OS=Bos taurus GN=CLHC1 PE=4 SV=1	2	Carbamidomethyl, Carbamyl, Carboxymethyl, Oxidation, Phospho	5.7	67.3	2	79.3 (M:79.3)	3.1	762.78	1816
1817		true	tr|E1B8Z0|E1B8Z0_BOVIN	Uncharacterized protein OS=Bos taurus GN=BRPF3 PE=4 SV=2	1	Carbamyl, Oxidation, Phospho, Glu->pyro-Glu	6.5	132.8	1	79.3 (M:79.3)	0.0	666.85	1817
1818		true	tr|F1MHT1|F1MHT1_BOVIN	Uncharacterized protein OS=Bos taurus GN=AGL PE=4 SV=2	2	Carbamyl, Oxidation, Phospho	6.3	174.0	1	79.2 (M:79.2)	1.3	709.57	1818
1819		true	tr|A7YWB6|A7YWB6_BOVIN	LOC539596 protein OS=Bos taurus GN=LOC539596 PE=2 SV=1	4	Gln->pyro-Glu, Carbamyl, Oxidation, Phospho	6.8	74.4	2	79.2 (M:79.2)	5.3	407.72	1819
1820		true	sp|Q3ZC31|HEM0_BOVIN	5-aminolevulinate synthase, erythroid-specific, mitochondrial OS=Bos taurus GN=ALAS2 PE=2 SV=1	2	Carbamidomethyl, Carbamyl, Oxidation, Phospho	7.9	65.1	1	79.2 (M:79.2)	5.8	457.00	1820
1821		true	sp|A2VE45|TT30A_BOVIN	Tetratricopeptide repeat protein 30A OS=Bos taurus GN=TTC30A PE=2 SV=1	4	Carbamyl, Oxidation, Phospho	5.1	76.3	1	79.2 (M:79.2)	2.6	845.98	1821
1822		true	tr|F1MFG6|F1MFG6_BOVIN	Serine/threonine-protein kinase N1 (Fragment) OS=Bos taurus GN=PKN1 PE=4 SV=2	2	Carbamyl, Phospho	6.2	103.5	2	79.2 (M:79.2)	2.3	1020.02	1822
1823		true	tr|Q8JTS2|Q8JTS2_LSDV	Putative virion core protein OS=Lumpy skin disease virus GN=LW101 PE=4 SV=1	2	Carbamyl	5.7	104.1	1	79.1 (M:79.1)	1.1	921.56	1823
1824		true	tr|Q9XSY0|Q9XSY0_BOVIN	Argininosuccinate lyase (Fragment) OS=Bos taurus GN=ASL PE=4 SV=1	4	Carbamyl, Phospho	5.5	4.5	1	79.1 (M:79.1)	79.5	697.61	1824
1825		true	sp|A6QP79|COL12_BOVIN	Collectin-12 OS=Bos taurus GN=COLEC12 PE=2 SV=1	2	Carbamyl, Phospho	5.4	81.7	1	79.0 (M:79.0)	3.0	10.39	1825
1826		true	tr|E1BLD1|E1BLD1_BOVIN	Uncharacterized protein OS=Bos taurus GN=HECTD1 PE=4 SV=2	1	Carbamidomethyl, Carbamyl, Carboxymethyl	5.2	289.2	1	79.0 (M:79.0)	0.3	27.66	1826
1827		true	tr|E1B9Z2|E1B9Z2_BOVIN	Uncharacterized protein OS=Bos taurus GN=LETM2 PE=4 SV=2	3	Carbamyl, Phospho	9.6	56.1	1	79.0 (M:79.0)	6.9	430.28	1827
1828		true	tr|E1BN85|E1BN85_BOVIN	Uncharacterized protein OS=Bos taurus GN=GTF2IRD1 PE=4 SV=2	3	Carbamyl, Oxidation, Phospho	6.5	105.9	1	79.0 (M:79.0)	2.8	499.58	1828
1829		true	tr|F1MBM9|F1MBM9_BOVIN	Uncharacterized protein OS=Bos taurus GN=ARHGEF7 PE=4 SV=2	1	Carbamyl, Phospho	6.2	97.1	1	78.9 (M:78.9)	1.0	27.87	1829
1830		true	tr|G5E5S3|G5E5S3_BOVIN	Kinesin-like protein (Fragment) OS=Bos taurus GN=KIF14 PE=3 SV=1	4	Carbamidomethyl, Carbamyl, Carboxymethyl, Phospho	5.9	141.4	1	78.8 (M:78.8)	3.9	13342.87	1830
1831		true	tr|G3N0F6|G3N0F6_BOVIN	Uncharacterized protein (Fragment) OS=Bos taurus GN=LOC537655 PE=4 SV=1	1	Carbamyl, Oxidation, Phospho	5.1	65.1	1	78.7 (M:78.7)	1.4	72.64	1831
1832		true	tr|A5D969|A5D969_BOVIN	Nuclear autoantigenic sperm protein OS=Bos taurus GN=NASP PE=2 SV=1	2	Carbamyl, Phospho	4.4	49.0	2	78.7 (M:78.7)	4.4	528.19	1832
1833		true	tr|G3MXK8|G3MXK8_BOVIN	Uncharacterized protein (Fragment) OS=Bos taurus GN=PRTN3 PE=3 SV=1	2		9.0	26.7	1	78.6 (M:78.6)	8.5	11.13	1833
1834		true	tr|E1BMH1|E1BMH1_BOVIN	Sodium channel protein OS=Bos taurus GN=SCN2A PE=3 SV=1	2	Carbamidomethyl, Carbamyl, Carboxymethyl, Oxidation, Phospho	5.5	227.7	3	78.6 (M:78.6)	0.6	35176.60	1834
1835		true	tr|F1MEN2|F1MEN2_BOVIN	Uncharacterized protein (Fragment) OS=Bos taurus GN=SPECC1 PE=4 SV=2	1	Carbamyl, Phospho, Glu->pyro-Glu	5.5	107.7	1	78.6 (M:78.6)	0.7	1196.56	1835
1836		true	tr|Q65784|Q65784_BVDV	Glycoprotein E2 (Fragment) OS=Bovine viral diarrhea virus PE=4 SV=1	2	Carbamidomethyl, Carbamyl, Carboxymethyl, Phospho	9.3	5.5	4	78.6 (M:78.6)	18.0	31.12	1836
1837		true	tr|E1BKQ9|E1BKQ9_BOVIN	Polypeptide N-acetylgalactosaminyltransferase OS=Bos taurus GN=GALNT5 PE=3 SV=2	2	Carbamyl, Phospho	9.5	106.7	1	78.6 (M:78.6)	2.0	557.70	1837
1838		true	tr|M0QW12|M0QW12_BOVIN	Sodium channel protein OS=Bos taurus GN=SCN1A PE=3 SV=1	1	Carbamyl, Oxidation, Phospho	5.7	227.6	1	78.5 (M:78.5)	0.4	79.37	1838
1839		true	sp|A7MBI0|PACN1_BOVIN	Protein kinase C and casein kinase substrate in neurons protein 1 OS=Bos taurus GN=PACSIN1 PE=2 SV=1	2	Carbamidomethyl, Carbamyl, Carboxymethyl, Oxidation, Phospho	5.1	50.6	1	78.5 (M:78.5)	4.1	957.75	1839
1840		true	tr|Q0VD36|Q0VD36_BOVIN	KDEL (Lys-Asp-Glu-Leu) containing 1 OS=Bos taurus GN=KDELC1 PE=2 SV=1	2	Carbamyl, Oxidation, Phospho, Glu->pyro-Glu	7.3	58.2	1	78.5 (M:78.5)	4.2	51.53	1840
1841		true	tr|Q148J4|Q148J4_BOVIN	RAB2A, member RAS oncogene family OS=Bos taurus GN=RAB2A PE=2 SV=1	2	Carbamidomethyl, Carboxymethyl, Phospho	7.0	20.8	2	78.4 (M:78.4)	6.9	6.37	1841
1842		true	tr|A5PJZ4|A5PJZ4_BOVIN	HECTD3 protein OS=Bos taurus GN=HECTD3 PE=2 SV=1	2	Carbamidomethyl	5.4	97.2	2	78.4 (M:78.4)	2.2	531.98	1842
1843		true	tr|E1BA29|E1BA29_BOVIN	Uncharacterized protein OS=Bos taurus GN=GNAQ PE=4 SV=1	2		5.5	42.1	3	78.4 (M:78.4)	5.3	11.43	1843
1844		true	sp|Q58DK4|TKFC_BOVIN	Triokinase/FMN cyclase OS=Bos taurus GN=TKFC PE=2 SV=1	3	Carbamyl, Oxidation, Phospho, Glu->pyro-Glu	6.4	59.1	2	78.2 (M:78.2)	6.1	12.31	1844
1845		true	tr|F1N3X1|F1N3X1_BOVIN	Uncharacterized protein OS=Bos taurus GN=LOC100125949 PE=4 SV=1	2	Carbamyl	11.3	21.6	5	78.1 (M:78.1)	3.4	50.41	1845
1846		true	tr|F1N2L5|F1N2L5_BOVIN	Uncharacterized protein OS=Bos taurus GN=MROH6 PE=4 SV=2	2	Carbamyl, Phospho	9.8	76.3	1	78.0 (M:78.0)	1.5	823.75	1846
1847		true	tr|F1MRX7|F1MRX7_BOVIN	Uncharacterized protein OS=Bos taurus GN=PDZRN3 PE=4 SV=2	4	Carbamyl, Oxidation, Phospho, Glu->pyro-Glu	5.6	118.4	1	78.0 (M:78.0)	4.0	53.80	1847
1848		true	tr|G3MZE1|G3MZE1_BOVIN	Uncharacterized protein (Fragment) OS=Bos taurus GN=BTBD18 PE=4 SV=1	2	Carbamyl, Phospho	4.9	72.9	1	78.0 (M:78.0)	1.2	30.07	1848
1849		true	tr|F1MPB1|F1MPB1_BOVIN	Uncharacterized protein OS=Bos taurus GN=GNPTAB PE=4 SV=2	3	Carbamyl, Oxidation, Phospho	7.2	142.4	1	78.0 (M:78.0)	2.6	353.17	1849
1850		true	tr|F1MUZ8|F1MUZ8_BOVIN	Aspartoacylase OS=Bos taurus GN=ASPA PE=3 SV=1	2	Carbamyl, Phospho, Glu->pyro-Glu	6.0	35.7	3	77.9 (M:77.9)	5.4	80.58	1850
1851		true	tr|F1MNU9|F1MNU9_BOVIN	Uncharacterized protein OS=Bos taurus GN=ANKS6 PE=4 SV=2	3	Carbamyl, Oxidation, Phospho, Glu->pyro-Glu	6.6	91.6	1	77.9 (M:77.9)	6.1	495.96	1851
1852		true	sp|Q08DK3|KLH20_BOVIN	Kelch-like protein 20 OS=Bos taurus GN=KLHL20 PE=2 SV=3	4	Carbamidomethyl, Carbamyl, Oxidation, Phospho	6.5	67.9	1	77.9 (M:77.9)	5.4	439.87	1852
1853		true	tr|F1MMC7|F1MMC7_BOVIN	Uncharacterized protein OS=Bos taurus GN=MYO1F PE=4 SV=2	2	Carbamidomethyl, Carboxymethyl, Oxidation, Phospho	9.2	124.9	1	77.9 (M:77.9)	2.0	480.70	1853
1854		true	tr|F1MKY9|F1MKY9_BOVIN	Uncharacterized protein OS=Bos taurus GN=ALPK2 PE=4 SV=2	3	Carbamyl, Phospho	5.6	228.4	1	77.8 (M:77.8)	1.4	568.98	1854
1855		true	tr|Q2HJD6|Q2HJD6_BOVIN	CUX1 protein (Fragment) OS=Bos taurus GN=CUX1 PE=2 SV=1	2	Carbamyl, Phospho	5.3	77.1	2	77.8 (M:77.8)	1.3	910.76	1855
1856		true	tr|F1MQG6|F1MQG6_BOVIN	Uncharacterized protein OS=Bos taurus GN=ACIN1 PE=4 SV=1	2	Carbamyl, Phospho	5.8	150.7	1	77.7 (M:77.7)	1.5	546.35	1856
1857		true	tr|F1N768|F1N768_BOVIN	Uncharacterized protein OS=Bos taurus GN=PPP1R12C PE=4 SV=2	1	Carbamyl, Glu->pyro-Glu	5.4	84.5	1	77.7 (M:77.7)	0.9	100.66	1857
1858		true	sp|P38408|GNA14_BOVIN	Guanine nucleotide-binding protein subunit alpha-14 OS=Bos taurus GN=GNA14 PE=2 SV=1	1	Carbamyl	5.8	41.5	1	77.6 (M:77.6)	2.3	10.91	1858
1859		true	tr|E1BCV2|E1BCV2_BOVIN	Uncharacterized protein OS=Bos taurus GN=DDIAS PE=4 SV=1	2	Carbamidomethyl, Carbamyl, Carboxymethyl, Oxidation, Phospho, Glu->pyro-Glu	8.1	108.9	1	77.6 (M:77.6)	2.2	781.36	1859
1860		true	tr|G3X7J6|G3X7J6_BOVIN	Uncharacterized protein OS=Bos taurus GN=EXD3 PE=4 SV=1	1	Carbamyl, Oxidation	8.7	79.6	1	77.6 (M:77.6)	1.0	42.19	1860
1861		true	tr|E1B7M6|E1B7M6_BOVIN	Phosphoinositide phospholipase C OS=Bos taurus GN=PLCB2 PE=4 SV=2	3	Carbamyl, Oxidation, Phospho	5.9	132.7	1	77.5 (M:77.5)	3.2	544.49	1861
1862		true	tr|U5TG18|U5TG18_COWPX	CPXV217 protein OS=Cowpox virus GN=CPXV217 PE=3 SV=1	1	Carbamyl, Oxidation, Phospho	5.1	43.7	1	77.5 (M:77.5)	2.6	817.36	1862
1863		true	sp|Q3ZCH0|GRP75_BOVIN	Stress-70 protein, mitochondrial OS=Bos taurus GN=HSPA9 PE=2 SV=1	3	Carbamyl, Oxidation, Phospho	6.0	73.7	1	77.4 (M:77.4)	6.9	691.40	1863
1864		true	tr|Q6F5T0|Q6F5T0_BVDV	Structural glycoprotein E2 (Fragment) OS=Bovine viral diarrhea virus GN=E2 PE=4 SV=1	3	Carbamidomethyl, Carbamyl, Phospho	8.7	15.6	4	77.3 (M:77.3)	17.9	475.02	1864
1865		true	tr|F1MGF7|F1MGF7_BOVIN	Uncharacterized protein OS=Bos taurus GN=CDK5RAP2 PE=4 SV=2	1	Carbamyl, Oxidation	5.3	212.6	1	77.3 (M:77.3)	0.6	809.10	1865
1866		true	tr|F1MKW3|F1MKW3_BOVIN	Uncharacterized protein (Fragment) OS=Bos taurus GN=PLEKHS1 PE=4 SV=2	4	Carbamidomethyl, Carbamyl, Carboxymethyl, Oxidation, Phospho	6.5	52.7	1	77.2 (M:77.2)	9.9	25211.75	1866
1867		true	tr|E1BNG2|E1BNG2_BOVIN	alpha-1,2-Mannosidase OS=Bos taurus GN=MAN1A1 PE=3 SV=2	1	Carbamyl, Oxidation, Phospho	6.4	73.5	1	77.2 (M:77.2)	1.7	11.48	1867
1868		true	tr|F1MKA8|F1MKA8_BOVIN	Uncharacterized protein OS=Bos taurus GN=BNC1 PE=4 SV=2	3	Carbamyl, Oxidation, Phospho	6.7	111.7	1	77.1 (M:77.1)	2.7	567.69	1868
1869		true	tr|E1BA84|E1BA84_BOVIN	Uncharacterized protein OS=Bos taurus GN=ELF4 PE=3 SV=1	1	Carbamidomethyl, Carboxymethyl, Phospho	5.5	70.9	1	77.1 (M:77.1)	1.2	51761.26	1869
1870		true	tr|F1N206|F1N206_BOVIN	Dihydrolipoyl dehydrogenase OS=Bos taurus GN=DLD PE=1 SV=2	1	Carbamidomethyl, Carbamyl, Oxidation, Phospho	7.6	54.2	1	77.1 (M:77.1)	2.4	683.45	1870
1871		true	tr|F1MVW4|F1MVW4_BOVIN	Uncharacterized protein (Fragment) OS=Bos taurus GN=XPO4 PE=4 SV=2	2	Carbamidomethyl, Carbamyl, Carboxymethyl, Phospho	5.0	129.8	2	77.1 (M:77.1)	1.1	16.75	1871
1872		true	tr|F1MIZ7|F1MIZ7_BOVIN	Uncharacterized protein OS=Bos taurus GN=TROVE2 PE=4 SV=2	2	Carbamidomethyl, Carbamyl, Oxidation, Phospho	7.5	60.3	1	77.1 (M:77.1)	3.9	10.13	1872
1873		true	tr|E1B9W6|E1B9W6_BOVIN	Uncharacterized protein OS=Bos taurus GN=ADCY10 PE=4 SV=2	2	Carbamidomethyl, Carbamyl, Carboxymethyl, Oxidation, Phospho	6.2	186.6	2	77.0 (M:77.0)	2.5	12593.23	1873
1874		true	tr|A6QPV4|A6QPV4_BOVIN	PPIL5 protein OS=Bos taurus GN=PPIL5 PE=2 SV=1	2	Carbamyl, Phospho	9.3	47.8	1	77.0 (M:77.0)	3.8	599.47	1874
1875		true	sp|P17462|VP2_ROTBU	Inner capsid protein VP2 OS=Rotavirus A (strain Cow/United Kingdom/UK/1975 G6-P7[5]-I2-R2-C2-M2-A3-N2-T7-E2-H3) PE=1 SV=1	2	Carbamyl, Oxidation, Phospho	5.8	102.4	4	77.0 (M:77.0)	2.0	558.61	1875
1876		true	tr|F1N1V0|F1N1V0_BOVIN	HBS1-like protein OS=Bos taurus GN=HBS1L PE=4 SV=1	2	Carbamidomethyl, Carbamyl, Carboxymethyl, Oxidation, Phospho, Glu->pyro-Glu	6.2	75.8	2	76.9 (M:76.9)	3.8	20536.73	1876
1877		true	tr|F1N279|F1N279_BOVIN	Uncharacterized protein (Fragment) OS=Bos taurus GN=ROBO1 PE=4 SV=2	4	Carbamyl, Phospho	5.7	161.8	2	76.8 (M:76.8)	3.3	412.33	1877
1878		true	tr|G3N0D9|G3N0D9_BOVIN	Uncharacterized protein OS=Bos taurus GN=BRD1 PE=4 SV=1	2	Carbamidomethyl, Carbamyl, Phospho	9.3	131.9	1	76.8 (M:76.8)	1.4	890.06	1878
1879		true	tr|E1BMF4|E1BMF4_BOVIN	Uncharacterized protein OS=Bos taurus GN=KIDINS220 PE=4 SV=2	3	Carbamyl, Oxidation, Phospho	6.2	196.0	1	76.8 (M:76.8)	1.6	676.27	1879
1880		true	tr|A5D7V0|A5D7V0_BOVIN	PRR11 protein OS=Bos taurus GN=PRR11 PE=2 SV=1	2	Phospho	10.6	40.1	2	76.8 (M:76.8)	0.0	1031.61	1880
1881		true	tr|F1MM05|F1MM05_BOVIN	Uncharacterized protein OS=Bos taurus GN=MAU2 PE=4 SV=2	1	Carbamyl, Phospho	6.8	69.0	1	76.7 (M:76.7)	1.8	12.50	1881
1882		true	sp|Q8BDD7|VE1_BPV3	Replication protein E1 OS=Bovine papillomavirus type 3 GN=E1 PE=3 SV=1	3	Carbamidomethyl, Carboxymethyl, Phospho	6.1	69.4	3	76.7 (M:76.7)	3.8	20803.57	1882
1883		true	tr|A7Z031|A7Z031_BOVIN	RASEF protein OS=Bos taurus GN=RASEF PE=2 SV=1	2	Carbamyl, Oxidation, Phospho	5.1	82.7	1	76.7 (M:76.7)	3.1	780.10	1883
1884		true	tr|E1BEY2|E1BEY2_BOVIN	Uncharacterized protein OS=Bos taurus GN=VWCE PE=4 SV=2	1	Carbamidomethyl, Carbamyl, Carboxymethyl, Phospho	5.9	99.4	1	76.7 (M:76.7)	0.9	10.74	1884
1885		true	tr|F1N413|F1N413_BOVIN	Uncharacterized protein (Fragment) OS=Bos taurus GN=EHMT2 PE=4 SV=2	2	Carbamyl, Phospho	5.5	138.6	2	76.7 (M:76.7)	0.6	1137.08	1885
1886		true	tr|M5BST2|M5BST2_THACB	Coiled-coil domain-containing protein 130 OS=Thanatephorus cucumeris (strain AG1-IB / isolate 7/3/14) GN=Ccdc130 PE=4 SV=1	3	Carbamyl, Phospho	9.5	40.9	1	76.6 (M:76.6)	6.8	1030.95	1886
1887		true	tr|E1BKZ9|E1BKZ9_BOVIN	Uncharacterized protein OS=Bos taurus GN=SORT1 PE=4 SV=1	2	Carbamidomethyl, Carbamyl, Carboxymethyl, Phospho	5.7	91.8	1	76.6 (M:76.6)	2.0	29409.91	1887
1888		true	tr|F1MCE3|F1MCE3_BOVIN	Uncharacterized protein (Fragment) OS=Bos taurus GN=C1orf168 PE=4 SV=2	3	Carbamyl	8.6	81.6	3	76.6 (M:76.6)	2.9	507.57	1888
1889		true	sp|Q3SZ54|IF4A1_BOVIN	Eukaryotic initiation factor 4A-I OS=Bos taurus GN=EIF4A1 PE=2 SV=1	2		5.3	46.1	1	76.4 (M:76.4)	5.4	641.05	1889
1890		true	tr|E1BM27|E1BM27_BOVIN	Uncharacterized protein (Fragment) OS=Bos taurus GN=CLMN PE=4 SV=2	3	Carbamyl, Phospho	5.0	112.8	1	76.4 (M:76.4)	3.8	256.80	1890
1891		true	tr|F1MQ43|F1MQ43_BOVIN	Uncharacterized protein OS=Bos taurus GN=DOCK9 PE=4 SV=2	4	Carbamidomethyl, Carbamyl, Carboxymethyl, Phospho	7.4	238.8	1	76.3 (M:76.3)	1.9	20654.76	1891
1892		true	tr|E1BLR9|E1BLR9_BOVIN	Uncharacterized protein OS=Bos taurus GN=CPD PE=4 SV=2	3	Carbamyl, Phospho	5.3	122.5	1	76.3 (M:76.3)	3.1	258.33	1892
1893		true	tr|F1MK90|F1MK90_BOVIN	Uncharacterized protein OS=Bos taurus GN=DNAJC1 PE=4 SV=2	2	Carbamidomethyl, Carbamyl	9.1	62.8	2	76.2 (M:76.2)	1.5	40.62	1893
1894		true	tr|E1BDE8|E1BDE8_BOVIN	Uncharacterized protein OS=Bos taurus GN=RBPJL PE=4 SV=2	2	Carbamidomethyl, Carbamyl, Carboxymethyl, Phospho	7.1	56.2	1	76.2 (M:76.2)	2.9	20.92	1894
1895		true	tr|G3N0K5|G3N0K5_BOVIN	Uncharacterized protein OS=Bos taurus GN=TTK PE=4 SV=1	3	Carbamyl, Oxidation, Phospho, Glu->pyro-Glu	8.3	90.0	2	76.2 (M:76.2)	3.9	332.86	1895
1896		true	tr|E1BAN8|E1BAN8_BOVIN	Uncharacterized protein OS=Bos taurus GN=INO80 PE=4 SV=1	2	Carbamyl, Oxidation, Phospho, Glu->pyro-Glu	9.4	177.6	1	76.2 (M:76.2)	1.5	821.05	1896
1897		true	tr|Q0R343|Q0R343_BOVIN	Protein O-fucosyltransferase 2a OS=Bos taurus GN=pofut2 PE=2 SV=1	2	Carbamyl	5.9	49.7	4	76.2 (M:76.2)	4.2	9.19	1897
1898		true	sp|A7MBJ5|CAND1_BOVIN	Cullin-associated NEDD8-dissociated protein 1 OS=Bos taurus GN=CAND1 PE=2 SV=1	1	Carbamyl, Oxidation, Phospho	5.5	136.3	1	76.1 (M:76.1)	0.7	855.67	1898
1899		true	sp|P07107|ACBP_BOVIN	Acyl-CoA-binding protein OS=Bos taurus GN=DBI PE=1 SV=2	3	Phospho	6.1	10.0	1	76.1 (M:76.1)	39.1	18.84	1899
1900		true	tr|A0JNP3|A0JNP3_BOVIN	LOC539475 protein (Fragment) OS=Bos taurus GN=LOC539475 PE=2 SV=1	1	Carbamyl, Phospho	10.1	15.7	1	76.0 (M:76.0)	4.4	1102.80	1900
1901		true	tr|F1MLG0|F1MLG0_BOVIN	Uncharacterized protein OS=Bos taurus GN=FBXW11 PE=4 SV=2	3	Carbamidomethyl, Carbamyl, Carboxymethyl, Oxidation, Phospho	7.0	61.0	1	76.0 (M:76.0)	3.8	30834.09	1901
1902		true	tr|G3X6D7|G3X6D7_BOVIN	Phosphatidylinositol 5-phosphate 4-kinase type-2 gamma (Fragment) OS=Bos taurus GN=PIP4K2C PE=4 SV=1	3	Carbamyl	5.7	41.2	2	76.0 (M:76.0)	11.6	484.97	1902
1903		true	tr|G3MZB0|G3MZB0_BOVIN	Uncharacterized protein OS=Bos taurus GN=GSTO2 PE=4 SV=1	2	Carbamyl, Phospho	8.5	24.4	2	76.0 (M:76.0)	2.9	24.96	1903
1904		true	tr|Q1MW34|Q1MW34_BOVIN	Myogenic regulatory factor 4 (Fragment) OS=Bos taurus GN=MRF4 PE=2 SV=1	2	Carbamyl, Phospho	6.4	24.2	2	75.9 (M:75.9)	6.5	872.43	1904
1905		true	tr|Q0VC37|Q0VC37_BOVIN	DNAation factor, 45kDa, alpha polypeptide OS=Bos taurus GN=DFFA PE=2 SV=1	1	Carbamidomethyl, Carbamyl, Carboxymethyl, Oxidation, Phospho	4.9	36.4	1	75.9 (M:75.9)	3.6	791.09	1905
1906		true	tr|E1BPI1|E1BPI1_BOVIN	Transporter OS=Bos taurus GN=SLC6A11 PE=3 SV=2	2	Carbamidomethyl, Carbamyl, Oxidation, Phospho	6.5	70.1	1	75.9 (M:75.9)	3.2	518.70	1906
1907		true	tr|Q08E54|Q08E54_BOVIN	Amyloid beta (A4) protein OS=Bos taurus GN=APP PE=2 SV=1	2	Oxidation, Phospho	4.8	78.5	1	75.9 (M:75.9)	2.9	11.31	1907
1908		true	tr|F1MIU3|F1MIU3_BOVIN	Transmembrane channel-like protein OS=Bos taurus GN=TMC5 PE=3 SV=2	2	Carbamyl, Phospho	6.5	113.7	1	75.8 (M:75.8)	2.9	10.56	1908
1909		true	sp|Q08DK4|GHC1_BOVIN	Mitochondrial glutamate carrier 1 OS=Bos taurus GN=SLC25A22 PE=2 SV=1	3	Carbamyl, Oxidation, Phospho	9.4	34.5	1	75.8 (M:75.8)	6.8	634.17	1909
1910		true	tr|F1MER3|F1MER3_BOVIN	Uncharacterized protein OS=Bos taurus GN=CWC25 PE=4 SV=1	3	Carbamyl, Oxidation, Phospho	10.2	49.6	3	75.8 (M:75.8)	6.4	616.37	1910
1911		true	tr|F1MAZ8|F1MAZ8_BOVIN	Uncharacterized protein OS=Bos taurus GN=MARK3 PE=4 SV=2	3	Carbamyl, Phospho, Glu->pyro-Glu	9.5	88.9	1	75.8 (M:75.8)	3.3	485.41	1911
1912		true	tr|G3MW10|G3MW10_BOVIN	Uncharacterized protein (Fragment) OS=Bos taurus GN=LOC100299180 PE=3 SV=1	2	Carbamyl, Phospho	6.7	126.7	3	75.8 (M:75.8)	2.1	731.18	1912
1913		true	tr|F1N2E4|F1N2E4_BOVIN	Uncharacterized protein (Fragment) OS=Bos taurus GN=EMILIN3 PE=4 SV=2	2	Carbamyl, Phospho	6.6	77.8	1	75.8 (M:75.8)	2.4	784.01	1913
1914		true	tr|F1MW38|F1MW38_BOVIN	Uncharacterized protein OS=Bos taurus GN=CRIM1 PE=4 SV=2	1	Carbamidomethyl, Carbamyl, Phospho	5.2	113.9	1	75.8 (M:75.8)	1.8	36.39	1914
1915		true	tr|Q99D22|Q99D22_BHV4	Putative uncharacterized protein ORF 6 OS=Bovine herpesvirus 4 GN=ORF 6 PE=4 SV=1	3	Carbamyl, Oxidation, Phospho	6.2	128.1	3	75.8 (M:75.8)	2.4	910.94	1915
1916		true	tr|E1B8C7|E1B8C7_BOVIN	Uncharacterized protein OS=Bos taurus GN=MDM1 PE=4 SV=2	4	Carbamyl, Phospho	9.2	81.8	1	75.8 (M:75.8)	4.1	617.08	1916
1917		true	tr|G3N0G4|G3N0G4_BOVIN	Uncharacterized protein (Fragment) OS=Bos taurus GN=UNC79 PE=4 SV=1	3	Carbamidomethyl, Carbamyl, Carboxymethyl, Oxidation, Phospho	6.0	297.9	3	75.8 (M:75.8)	1.2	29241.28	1917
1918		true	tr|Q3MHZ0|Q3MHZ0_BOVIN	FLOT1 protein (Fragment) OS=Bos taurus GN=FLOT1 PE=2 SV=1	2	Carbamyl, Oxidation, Phospho	6.8	46.4	2	75.7 (M:75.7)	7.6	406.53	1918
1919		true	tr|Q0VBY4|Q0VBY4_BOVIN	Tumor protein D52-like 1 OS=Bos taurus GN=TPD52L1 PE=2 SV=1	2		5.8	22.8	1	75.7 (M:75.7)	11.5	10.58	1919
1920		true	tr|R4J9I7|R4J9I7_BTV1X	VP2 OS=Bluetongue virus 10 PE=4 SV=1	2	Carbamidomethyl, Gln->pyro-Glu, Carbamyl, Phospho	7.0	111.1	2	75.7 (M:75.7)	2.4	742.26	1920
1921		true	tr|F1MFL0|F1MFL0_BOVIN	Uncharacterized protein (Fragment) OS=Bos taurus GN=PRUNE2 PE=4 SV=2	2	Carbamyl, Oxidation, Phospho, Glu->pyro-Glu	4.3	340.7	1	75.7 (M:75.7)	1.1	662.28	1921
1922		true	tr|F1MJH8|F1MJH8_BOVIN	Uncharacterized protein (Fragment) OS=Bos taurus GN=ARHGAP18 PE=4 SV=2	3	Carbamyl, Oxidation	7.1	71.1	3	75.7 (M:75.7)	5.7	622.46	1922
1923		true	tr|G3MXX6|G3MXX6_BOVIN	Uncharacterized protein (Fragment) OS=Bos taurus GN=CCDC40 PE=4 SV=1	2	Carbamyl, Oxidation, Phospho	6.2	102.9	2	75.7 (M:75.7)	1.7	912.60	1923
1924		true	tr|G3N3S4|G3N3S4_BOVIN	Actin-related protein 2/3 complex subunit 4 OS=Bos taurus GN=ARPC4 PE=4 SV=1	2	Carbamidomethyl, Carbamyl, Oxidation, Phospho	8.7	97.3	2	75.6 (M:75.6)	0.0	854.74	1924
1925		true	tr|E1BNE0|E1BNE0_BOVIN	Tyrosine-protein kinase OS=Bos taurus GN=FER PE=3 SV=1	2	Carbamyl, Oxidation, Phospho	7.0	94.7	1	75.6 (M:75.6)	1.9	52.63	1925
1926		true	tr|F1MPE5|F1MPE5_BOVIN	Uncharacterized protein (Fragment) OS=Bos taurus GN=IPO5 PE=4 SV=2	2	Carbamyl, Oxidation, Phospho	4.8	124.9	2	75.5 (M:75.5)	1.8	789.58	1926
1927		true	tr|G3MYR4|G3MYR4_BOVIN	Gamma-aminobutyric acid receptor subunit gamma-2 OS=Bos taurus GN=GABRG2 PE=3 SV=1	2	Carbamyl, Oxidation, Phospho	8.8	54.2	4	75.5 (M:75.5)	1.9	41.99	1927
1928		true	tr|E1BE15|E1BE15_BOVIN	Uncharacterized protein OS=Bos taurus GN=SEMA3D PE=4 SV=2	3	Carbamidomethyl, Carbamyl, Carboxymethyl, Oxidation, Phospho	7.9	89.7	4	75.5 (M:75.5)	4.2	14058.41	1928
1929		true	tr|Q0P5E0|Q0P5E0_BOVIN	Lymphocyte-specific protein 1 OS=Bos taurus GN=LSP1 PE=1 SV=1	2	Carbamyl, Phospho	4.7	39.3	1	75.5 (M:75.5)	6.1	657.96	1929
1930		true	tr|F1MZ25|F1MZ25_BOVIN	Uncharacterized protein OS=Bos taurus GN=FCHO1 PE=4 SV=2	1	Carbamyl, Oxidation, Phospho	6.5	96.9	1	75.4 (M:75.4)	0.0	659.61	1930
1931		true	tr|F1N3I4|F1N3I4_BOVIN	Uncharacterized protein OS=Bos taurus GN=MYOF PE=4 SV=2	2	Carbamidomethyl, Carbamyl, Phospho	5.9	234.5	1	75.4 (M:75.4)	1.4	296.95	1931
1932		true	tr|A5PK71|A5PK71_BOVIN	PACRG protein OS=Bos taurus GN=PACRG PE=2 SV=1	3	Carbamidomethyl, Carboxymethyl, Phospho	8.5	29.3	1	75.4 (M:75.4)	13.6	23484.82	1932
1933		true	tr|A6QR12|A6QR12_BOVIN	Uncharacterized protein OS=Bos taurus GN=YME1L1 PE=2 SV=1	2	Carbamidomethyl, Carbamyl, Carboxymethyl, Phospho	8.7	80.0	1	75.4 (M:75.4)	2.1	18905.43	1933
1934		true	tr|F1MHX7|F1MHX7_BOVIN	Uncharacterized protein OS=Bos taurus GN=LARP4B PE=4 SV=2	2	Carbamidomethyl, Carbamyl, Carboxymethyl, Phospho	8.8	80.1	1	75.4 (M:75.4)	2.5	46120.63	1934
1935		true	tr|E1B8T0|E1B8T0_BOVIN	Uncharacterized protein OS=Bos taurus GN=FAM193A PE=4 SV=2	2	Carbamyl, Phospho	6.3	132.9	1	75.3 (M:75.3)	1.5	856.86	1935
1936		true	tr|B3FXL2|B3FXL2_BOVIN	Interleukin-1 receptor-associated kinase 2 transcript variant 2 OS=Bos taurus GN=Irak2 PE=2 SV=1	3	Carbamidomethyl, Carbamyl, Carboxymethyl, Oxidation, Phospho, Glu->pyro-Glu	5.2	41.9	4	75.3 (M:75.3)	6.5	39453.35	1936
1937		true	sp|P21615|RDRP_ROTBU	RNA-directed RNA polymerase OS=Rotavirus A (strain Cow/United Kingdom/UK/1975 G6-P7[5]-I2-R2-C2-M2-A3-N2-T7-E2-H3) PE=2 SV=1	4	Carbamyl, Oxidation, Phospho	8.3	124.9	4	75.3 (M:75.3)	2.9	633.93	1937
1938		true	sp|Q5EAE0-2|ERGI3_BOVIN	Isoform 2 of Endoplasmic reticulum-Golgi intermediate compartment protein 3 OS=Bos taurus GN=ERGIC3	4	Carbamidomethyl, Carbamyl, Carboxymethyl, Oxidation, Phospho	5.6	26.4	7	75.3 (M:75.3)	10.4	36519.91	1938
1939		true	sp|Q2TBI4|TRAP1_BOVIN	Heat shock protein 75 kDa, mitochondrial OS=Bos taurus GN=TRAP1 PE=2 SV=1	2	Carbamyl, Glu->pyro-Glu	6.7	79.3	1	75.2 (M:75.2)	3.6	16.84	1939
1940		true	tr|E1BEW6|E1BEW6_BOVIN	Uncharacterized protein OS=Bos taurus GN=EXOSC7 PE=4 SV=1	2	Carbamidomethyl, Carbamyl, Carboxymethyl, Oxidation, Phospho	5.0	31.7	1	75.1 (M:75.1)	3.8	629.91	1940
1941		true	tr|F1MF02|F1MF02_BOVIN	Uncharacterized protein OS=Bos taurus GN=SLAIN2 PE=4 SV=1	3	Carbamyl, Phospho	7.7	49.5	2	75.1 (M:75.1)	4.6	990.96	1941
1942		true	sp|Q3SZM5|NEUA_BOVIN	N-acylneuraminate cytidylyltransferase OS=Bos taurus GN=CMAS PE=2 SV=1	2	Carbamidomethyl, Carbamyl, Phospho	8.2	48.4	2	75.1 (M:75.1)	2.5	736.02	1942
1943		true	tr|G5E5T4|G5E5T4_BOVIN	Uncharacterized protein (Fragment) OS=Bos taurus PE=4 SV=1	3	Carbamyl, Phospho	4.8	49.7	1	75.0 (M:75.0)	7.9	461.18	1943
1944		true	tr|Q2KIR9|Q2KIR9_BOVIN	Leucine rich repeat containing 46 OS=Bos taurus GN=LRRC46 PE=2 SV=1	4	Carbamyl, Phospho	5.1	35.9	1	75.0 (M:75.0)	13.3	244.58	1944
1945		true	sp|Q03763|DSG1_BOVIN	Desmoglein-1 OS=Bos taurus GN=DSG1 PE=1 SV=1	2	Carbamidomethyl, Carbamyl, Carboxymethyl, Oxidation, Phospho	5.0	112.2	2	74.9 (M:74.9)	2.5	21643.61	1945
1946		true	tr|Q9QCQ1|Q9QCQ1_LSDV	Major envelope protein OS=Lumpy skin disease virus GN=LW028 PE=4 SV=1	1	Carbamidomethyl, Carbamyl, Carboxymethyl, Phospho	7.1	41.3	1	74.9 (M:74.9)	3.2	799.39	1946
1947		true	tr|F1MID8|F1MID8_BOVIN	X-linked retinitis pigmentosa GTPase regulator-interacting protein 1 (Fragment) OS=Bos taurus GN=RPGRIP1 PE=4 SV=2	2	Carbamyl, Phospho	5.1	103.4	2	74.9 (M:74.9)	0.0	729.13	1947
1948		true	tr|E1BDF9|E1BDF9_BOVIN	Uncharacterized protein OS=Bos taurus GN=PCDH19 PE=4 SV=2	2	Carbamyl, Phospho, Glu->pyro-Glu	5.1	120.7	1	74.8 (M:74.8)	1.2	912.62	1948
1949		true	sp|O18789|RS2_BOVIN	40S ribosomal protein S2 OS=Bos taurus GN=RPS2 PE=2 SV=2	4	Carbamidomethyl, Carbamyl, Phospho	10.3	31.2	2	74.8 (M:74.8)	13.3	291.84	1949
1950		true	tr|A5PKJ5|A5PKJ5_BOVIN	UNC45A protein OS=Bos taurus GN=UNC45A PE=2 SV=1	3	Carbamidomethyl, Oxidation, Phospho	6.1	101.8	1	74.8 (M:74.8)	2.7	443.76	1950
1951		true	tr|F1N7G5|F1N7G5_BOVIN	Uncharacterized protein OS=Bos taurus GN=CCDC11 PE=4 SV=2	3	Carbamyl, Glu->pyro-Glu	8.8	62.0	1	74.8 (M:74.8)	4.5	852.21	1951
1952		true	tr|A2VDS9|A2VDS9_BOVIN	Vasopressin V1a receptor OS=Bos taurus GN=AVPR1A PE=2 SV=1	2	Carbamidomethyl, Carbamyl, Carboxymethyl, Oxidation, Phospho	9.6	46.5	1	74.8 (M:74.8)	5.5	413.92	1952
1953		true	tr|E1B7R0|E1B7R0_BOVIN	DIS3-like exonuclease 2 OS=Bos taurus GN=DIS3L2 PE=3 SV=2	3	Carbamidomethyl, Carbamyl, Phospho	5.9	99.1	1	74.8 (M:74.8)	4.1	511.12	1953
1954		true	tr|F1MGJ5|F1MGJ5_BOVIN	Uncharacterized protein (Fragment) OS=Bos taurus GN=SEL1L PE=4 SV=2	3	Carbamidomethyl, Gln->pyro-Glu, Oxidation	5.9	94.2	1	74.8 (M:74.8)	4.2	564.78	1954
1955		true	tr|E1BPW3|E1BPW3_BOVIN	Uncharacterized protein (Fragment) OS=Bos taurus GN=FAM135A PE=4 SV=2	3	Carbamidomethyl, Carbamyl, Carboxymethyl, Oxidation, Phospho	5.2	165.0	1	74.8 (M:74.8)	2.1	21594.98	1955
1956		true	tr|G3N242|G3N242_BOVIN	Uncharacterized protein OS=Bos taurus GN=RUNX1T1 PE=4 SV=1	4	Carbamidomethyl, Carbamyl, Carboxymethyl, Phospho	10.1	23.6	2	74.6 (M:74.6)	14.3	21363.60	1956
1957		true	sp|Q3ZBR5|TTC1_BOVIN	Tetratricopeptide repeat protein 1 OS=Bos taurus GN=TTC1 PE=2 SV=1	3	Carbamidomethyl, Carbamyl, Oxidation, Phospho	4.8	33.6	1	74.6 (M:74.6)	3.4	391.77	1957
1958		true	tr|E1BET1|E1BET1_BOVIN	Uncharacterized protein OS=Bos taurus GN=SIPA1L2 PE=4 SV=2	3	Carbamidomethyl, Carbamyl, Phospho	6.2	189.5	1	74.6 (M:74.6)	2.2	457.71	1958
1959		true	tr|F1MF34|F1MF34_BOVIN	Uncharacterized protein OS=Bos taurus GN=LCA5 PE=4 SV=2	3	Carbamyl, Phospho	9.3	77.8	1	74.5 (M:74.5)	3.5	677.46	1959
1960		true	tr|F1MHM7|F1MHM7_BOVIN	Uncharacterized protein OS=Bos taurus GN=CEBPZ PE=4 SV=1	2	Carbamyl, Oxidation, Phospho	5.4	122.1	2	74.4 (M:74.4)	2.7	40.00	1960
1961		true	tr|F1N7D5|F1N7D5_BOVIN	Uncharacterized protein OS=Bos taurus GN=MYO1H PE=4 SV=2	1	Carbamyl, Oxidation, Phospho	9.0	120.8	1	74.3 (M:74.3)	1.5	503.58	1961
1962		true	tr|F6Q3H3|F6Q3H3_BOVIN	Uncharacterized protein OS=Bos taurus GN=TTI1 PE=4 SV=1	2	Carbamidomethyl, Carbamyl, Carboxymethyl, Oxidation, Phospho	5.5	121.3	3	74.3 (M:74.3)	1.6	1088.71	1962
1963		true	tr|E1BIQ6|E1BIQ6_BOVIN	Uncharacterized protein OS=Bos taurus GN=BACH2 PE=4 SV=1	3	Carbamidomethyl, Carbamyl, Carboxymethyl, Oxidation, Phospho	5.0	92.3	1	74.2 (M:74.2)	3.6	36668.78	1963
1964		true	tr|F1MQU6|F1MQU6_BOVIN	Uncharacterized protein (Fragment) OS=Bos taurus PE=4 SV=2	3	Carbamidomethyl, Carbamyl, Carboxymethyl	9.3	70.9	1	74.1 (M:74.1)	2.7	34145.32	1964
1965		true	sp|Q3SYS6|CHP1_BOVIN	Calcineurin B homologous protein 1 OS=Bos taurus GN=CHP1 PE=2 SV=1	2	Carbamyl	5.0	22.4	1	74.1 (M:74.1)	13.3	58.41	1965
1966		true	tr|E1BF07|E1BF07_BOVIN	Uncharacterized protein OS=Bos taurus GN=ZNF541 PE=4 SV=2	2	Carbamyl, Oxidation, Phospho	8.1	146.1	2	74.1 (M:74.1)	2.0	17.42	1966
1967		true	tr|Q2TBQ1|Q2TBQ1_BOVIN	Coagulation factor XIII, B polypeptide OS=Bos taurus GN=F13B PE=2 SV=1	2	Carbamidomethyl, Carbamyl, Oxidation, Phospho	6.3	75.1	1	74.1 (M:74.1)	5.4	41.20	1967
1968		true	tr|E1BMW2|E1BMW2_BOVIN	Uncharacterized protein (Fragment) OS=Bos taurus PE=4 SV=2	2	Carbamyl, Phospho	8.6	106.8	1	74.0 (M:74.0)	2.3	779.55	1968
1969		true	sp|Q3ZBY2|TAGL3_BOVIN	Transgelin-3 OS=Bos taurus GN=TAGLN3 PE=2 SV=1	4	Carbamidomethyl, Gln->pyro-Glu, Carbamyl, Carboxymethyl, Oxidation	6.8	22.5	1	74.0 (M:74.0)	16.1	20901.56	1969
1970		true	tr|F1N6H6|F1N6H6_BOVIN	Uncharacterized protein OS=Bos taurus GN=EPHA10 PE=4 SV=2	3	Carbamyl, Phospho, Glu->pyro-Glu	6.7	109.3	1	73.9 (M:73.9)	3.4	594.84	1970
1971		true	tr|Q3T0J4|Q3T0J4_BOVIN	Heme oxygenase (Decycling) 2 OS=Bos taurus GN=HMOX2 PE=2 SV=1	3	Carbamyl, Oxidation, Phospho	6.0	22.3	2	73.9 (M:73.9)	12.9	770.50	1971
1972		true	tr|F1MLJ0|F1MLJ0_BOVIN	Uncharacterized protein OS=Bos taurus GN=WIZ PE=4 SV=2	3	Carbamyl, Oxidation, Phospho	9.6	103.2	1	73.9 (M:73.9)	4.0	601.92	1972
1973		true	tr|E1BGK8|E1BGK8_BOVIN	Histone-lysine N-methyltransferase, H3 lysine-79 specific OS=Bos taurus GN=DOT1L PE=3 SV=2	3	Carbamyl, Oxidation	9.4	182.0	1	73.9 (M:73.9)	1.3	684.92	1973
1974		true	tr|D5HSX1|D5HSX1_BOVIN	cGMP-dependent protein kinase OS=Bos taurus GN=PRKG2 PE=3 SV=1	2	Carbamyl, Phospho	8.7	87.1	1	73.8 (M:73.8)	3.1	324.32	1974
1975		true	tr|A3KN39|A3KN39_BOVIN	NCAPG protein OS=Bos taurus GN=NCAPG PE=2 SV=1	2	Carbamyl, Oxidation, Phospho, Glu->pyro-Glu	5.4	114.8	3	73.8 (M:73.8)	0.8	52.27	1975
1976		true	sp|E1BPH3|TDRD5_BOVIN	Tudor domain-containing protein 5 OS=Bos taurus GN=TDRD5 PE=3 SV=1	3	Carbamidomethyl, Carbamyl, Carboxymethyl, Phospho	7.2	109.6	2	73.8 (M:73.8)	3.5	15142.48	1976
1977		true	sp|P19035|APOC3_BOVIN	Apolipoprotein C-III OS=Bos taurus GN=APOC3 PE=1 SV=2	2		5.0	10.7	1	73.8 (M:73.8)	28.1	10.83	1977
1978		true	tr|O12381|O12381_BLV	Pol protein (Fragment) OS=Bovine leukemia virus GN=pol PE=4 SV=1	3	Carbamyl, Phospho	9.1	39.8	18	73.8 (M:73.8)	6.4	599.53	1978
1979		true	sp|Q8BB04|VP3_ROTRF	Protein VP3 OS=Rotavirus A (strain Cow/France/RF/1975 G6-P6[1]-I2-R2-C2-M2-A3-N2-T6-E2-H3) PE=2 SV=1	2	Carbamyl, Oxidation, Phospho	7.3	98.0	4	73.8 (M:73.8)	0.8	15.89	1979
1980		true	tr|A2VDQ0|A2VDQ0_BOVIN	Intraflagellar transport 81 homolog (Chlamydomonas) OS=Bos taurus GN=IFT81 PE=2 SV=1	2	Carbamyl, Oxidation, Phospho	8.8	79.4	1	73.7 (M:73.7)	3.1	40.65	1980
1981		true	tr|F1N2X3|F1N2X3_BOVIN	Uncharacterized protein (Fragment) OS=Bos taurus GN=FRMPD2 PE=4 SV=2	1	Carbamyl, Oxidation, Phospho	6.0	143.5	1	73.7 (M:73.7)	0.0	53.82	1981
1982		true	tr|F1MNB7|F1MNB7_BOVIN	Uncharacterized protein OS=Bos taurus GN=SNX25 PE=4 SV=2	2	Carbamyl, Oxidation, Phospho	7.3	98.4	1	73.7 (M:73.7)	2.7	466.23	1982
1983		true	tr|F1MP52|F1MP52_BOVIN	Uncharacterized protein (Fragment) OS=Bos taurus GN=SHC3 PE=4 SV=1	3	Carbamidomethyl, Carbamyl, Oxidation, Phospho	6.4	45.2	1	73.7 (M:73.7)	8.7	776.39	1983
1984		true	tr|E1BDZ8|E1BDZ8_BOVIN	Enhancer of polycomb homolog OS=Bos taurus GN=EPC2 PE=3 SV=1	4	Carbamidomethyl, Carbamyl, Carboxymethyl, Oxidation, Phospho	9.1	91.1	1	73.7 (M:73.7)	6.8	19097.64	1984
1985		true	tr|A5D791|A5D791_BOVIN	EIF2AK3 protein OS=Bos taurus GN=EIF2AK3 PE=2 SV=1	2	Carbamidomethyl, Carbamyl, Carboxymethyl, Oxidation, Phospho, Glu->pyro-Glu	5.3	124.5	1	73.7 (M:73.7)	2.2	59.17	1985
1986		true	tr|E1BNU3|E1BNU3_BOVIN	Uncharacterized protein OS=Bos taurus GN=KANK3 PE=4 SV=2	2	Carbamyl, Oxidation, Phospho	5.0	84.6	1	73.7 (M:73.7)	2.2	85.71	1986
1987		true	tr|E1AXU0|E1AXU0_BOVIN	Cardiomyopathy associated protein 1 OS=Bos taurus GN=CMYA1 PE=2 SV=1	3	Carbamidomethyl, Carbamyl, Phospho	6.0	194.7	1	73.6 (M:73.6)	2.1	350.61	1987
1988		true	tr|G3N001|G3N001_BOVIN	Uncharacterized protein OS=Bos taurus GN=LRRC14B PE=4 SV=1	2	Carbamyl	8.1	56.1	1	73.6 (M:73.6)	3.1	19.30	1988
1989		true	tr|F1N753|F1N753_BOVIN	Uncharacterized protein (Fragment) OS=Bos taurus GN=BEND2 PE=4 SV=2	4	Carbamyl, Oxidation, Phospho	4.6	68.9	1	73.6 (M:73.6)	4.9	877.86	1989
1990		true	sp|Q8MI28|LBN_BOVIN	Limbin OS=Bos taurus GN=EVC2 PE=2 SV=1	4	Carbamyl, Phospho	6.3	137.7	2	73.6 (M:73.6)	2.8	600.47	1990
1991		true	tr|G3N0H2|G3N0H2_BOVIN	Uncharacterized protein (Fragment) OS=Bos taurus GN=C2orf16 PE=4 SV=1	3	Carbamyl, Oxidation, Phospho	10.0	195.5	1	73.6 (M:73.6)	2.2	438.21	1991
1992		true	tr|G3MXJ2|G3MXJ2_BOVIN	Uncharacterized protein (Fragment) OS=Bos taurus GN=GIMAP8 PE=4 SV=1	3	Carbamyl, Phospho	6.6	73.7	3	73.6 (M:73.6)	4.7	815.79	1992
1993		true	tr|E1B6X6|E1B6X6_BOVIN	Uncharacterized protein OS=Bos taurus GN=BAZ1B PE=4 SV=2	2	Carbamyl, Oxidation, Phospho	8.7	170.5	1	73.6 (M:73.6)	1.6	857.33	1993
1994		true	tr|F1MUA7|F1MUA7_BOVIN	Uncharacterized protein (Fragment) OS=Bos taurus GN=KIAA1598 PE=4 SV=2	2	Gln->pyro-Glu, Carbamyl, Oxidation, Phospho	5.9	69.0	1	73.6 (M:73.6)	2.8	1026.72	1994
1995		true	tr|F1MD79|F1MD79_BOVIN	Uncharacterized protein (Fragment) OS=Bos taurus GN=ANKFY1 PE=4 SV=2	1	Carbamyl, Phospho	5.7	130.0	1	73.6 (M:73.6)	1.7	387.50	1995
1996		true	tr|F1MZK6|F1MZK6_BOVIN	Uncharacterized protein (Fragment) OS=Bos taurus GN=MROH2A PE=4 SV=2	3	Carbamidomethyl, Carbamyl, Carboxymethyl, Oxidation, Phospho	6.9	177.9	1	73.6 (M:73.6)	1.8	23805.04	1996
1997		true	tr|F1MZ84|F1MZ84_BOVIN	Piwi-like protein (Fragment) OS=Bos taurus GN=PIWIL4 PE=3 SV=2	2	Gln->pyro-Glu, Carbamyl, Oxidation, Phospho, Glu->pyro-Glu	9.2	96.7	1	73.6 (M:73.6)	2.5	932.79	1997
1998		true	tr|Q3SZ56|Q3SZ56_BOVIN	Nucleoporin 88kDa OS=Bos taurus GN=NUP88 PE=2 SV=1	3	Carbamidomethyl, Carbamyl, Oxidation, Phospho, Glu->pyro-Glu	5.7	83.7	1	73.5 (M:73.5)	2.3	817.53	1998
1999		true	tr|A6QP89|A6QP89_BOVIN	MYBPC1 protein OS=Bos taurus GN=MYBPC1 PE=2 SV=1	3	Carbamyl, Phospho	5.6	133.9	1	73.5 (M:73.5)	2.5	840.41	1999
[truncated: 6,423 more rows]
